# Supplementary material for: Neuronal methylome reveals CREB-associated neuro-axonal impairment in multiple sclerosis
Source: Clin Epigenetics. 2019 May 30;11:86. doi: 10.1186/s13148-019-0678-1 (PMC6543588; doi:10.1186/s13148-019-0678-1)
Supplement: Supplementary file 6 — Table S5. 5mC-DMRs, 5hmC-DhMRs and BS-DMRs (cohort 2). (XLSX 508 kb) [file 13148_2019_678_MOESM6_ESM.xlsx]

## Sheet: TS5. 5mC-DMRs
Supplementary Table 5. 5mC-DMRs, 5hmC-DhMRs and BS-DMRs (cohort 2).
DMR_ID	Chr	Start	Stop	no.cpgs	minfdr	Stouffer	maxbetafc	meanbetafc	ProbeIDs	UCSC_RefGene_Group	UCSC_RefGene_Name	CpG in other DMRs	cgi	conserved_tfbs
1	chr7	5389516	5391705	14	6.13857e-37	5.5461e-05	-0.226296	-0.0895804	cg04939944	Body	TNRC18	BS	shore	NA
1	chr7	5389516	5391705	14	6.13857e-37	5.5461e-05	-0.226296	-0.0895804	cg10327399	Body	TNRC18	BS	shore	NA
1	chr7	5389516	5391705	14	6.13857e-37	5.5461e-05	-0.226296	-0.0895804	cg10546562	Body	TNRC18	BS	shore	NA
1	chr7	5389516	5391705	14	6.13857e-37	5.5461e-05	-0.226296	-0.0895804	cg25148306	Body	TNRC18	BS	shore	NA
1	chr7	5389516	5391705	14	6.13857e-37	5.5461e-05	-0.226296	-0.0895804	cg04193909	Body	TNRC18	BS	shore	NA
1	chr7	5389516	5391705	14	6.13857e-37	5.5461e-05	-0.226296	-0.0895804	cg17199010	Body	TNRC18	BS	shore	NA
1	chr7	5389516	5391705	14	6.13857e-37	5.5461e-05	-0.226296	-0.0895804	cg13972711	Body	TNRC18	BS	shore	NA
1	chr7	5389516	5391705	14	6.13857e-37	5.5461e-05	-0.226296	-0.0895804	cg20025824	Body	TNRC18		shore	NA
1	chr7	5389516	5391705	14	6.13857e-37	5.5461e-05	-0.226296	-0.0895804	cg18250135	Body	TNRC18		shore	NA
1	chr7	5389516	5391705	14	6.13857e-37	5.5461e-05	-0.226296	-0.0895804	cg09794469	Body	TNRC18		island	NA
1	chr7	5389516	5391705	14	6.13857e-37	5.5461e-05	-0.226296	-0.0895804	cg00135038	Body	TNRC18		island	NA
1	chr7	5389516	5391705	14	6.13857e-37	5.5461e-05	-0.226296	-0.0895804	cg05511613	Body	TNRC18		island	NA
1	chr7	5389516	5391705	14	6.13857e-37	5.5461e-05	-0.226296	-0.0895804	cg26312950	Body	TNRC18		island	NA
1	chr7	5389516	5391705	14	6.13857e-37	5.5461e-05	-0.226296	-0.0895804	cg18728076	Body	TNRC18		shore	NA
2	chr11	66102055	66102686	6	9.58603e-24	6.63921e-05	-0.259234	-0.200166	cg20749584	Body	RIN1	5hmC	island	NA
2	chr11	66102055	66102686	6	9.58603e-24	6.63921e-05	-0.259234	-0.200166	cg07948432	Body	RIN1	5hmC	island	NA
2	chr11	66102055	66102686	6	9.58603e-24	6.63921e-05	-0.259234	-0.200166	cg04808027	Body	RIN1	5hmC	island	NA
2	chr11	66102055	66102686	6	9.58603e-24	6.63921e-05	-0.259234	-0.200166	cg12912663	Body	RIN1	5hmC	island	NA
2	chr11	66102055	66102686	6	9.58603e-24	6.63921e-05	-0.259234	-0.200166	cg12068791	Body	RIN1	5hmC	shore	NA
2	chr11	66102055	66102686	6	9.58603e-24	6.63921e-05	-0.259234	-0.200166	cg12062782	Body	RIN1	5hmC	shore	NA
3	chr1	18808559	18809764	8	2.40765e-22	9.23102e-05	-0.330389	-0.228391	cg15131316	1stExon	KLHDC7A		island	NA
3	chr1	18808559	18809764	8	2.40765e-22	9.23102e-05	-0.330389	-0.228391	cg10011018	1stExon	KLHDC7A		island	NA
3	chr1	18808559	18809764	8	2.40765e-22	9.23102e-05	-0.330389	-0.228391	cg24076588	1stExon	KLHDC7A		shore	NA
3	chr1	18808559	18809764	8	2.40765e-22	9.23102e-05	-0.330389	-0.228391	cg03733578	1stExon	KLHDC7A		island	NA
3	chr1	18808559	18809764	8	2.40765e-22	9.23102e-05	-0.330389	-0.228391	cg06662140	1stExon	KLHDC7A		island	NA
3	chr1	18808559	18809764	8	2.40765e-22	9.23102e-05	-0.330389	-0.228391	cg23281527	1stExon	KLHDC7A		island	V$CMYB_01
3	chr1	18808559	18809764	8	2.40765e-22	9.23102e-05	-0.330389	-0.228391	cg07632391	1stExon	KLHDC7A		island	NA
3	chr1	18808559	18809764	8	2.40765e-22	9.23102e-05	-0.330389	-0.228391	cg21693033	1stExon	KLHDC7A		shore	NA
4	chr22	24822802	24823554	10	2.33784e-25	0.00015397	-0.154279	-0.111657	cg04250930	TSS1500	ADORA2A	BS	shelf	NA
4	chr22	24822802	24823554	10	2.33784e-25	0.00015397	-0.154279	-0.111657	cg12793123	1stExon;5'UTR	ADORA2A;ADORA2A	BS	shelf	NA
4	chr22	24822802	24823554	10	2.33784e-25	0.00015397	-0.154279	-0.111657	cg26354221	TSS1500	ADORA2A	BS	shore	NA
4	chr22	24822802	24823554	10	2.33784e-25	0.00015397	-0.154279	-0.111657	cg26001125	TSS1500	ADORA2A	BS	shelf	NA
4	chr22	24822802	24823554	10	2.33784e-25	0.00015397	-0.154279	-0.111657	cg15499799	TSS1500	ADORA2A	BS	shelf	NA
4	chr22	24822802	24823554	10	2.33784e-25	0.00015397	-0.154279	-0.111657	cg01373166	TSS200	ADORA2A	BS	shelf	NA
4	chr22	24822802	24823554	10	2.33784e-25	0.00015397	-0.154279	-0.111657	cg08025954	TSS200	ADORA2A	BS	shelf	NA
4	chr22	24822802	24823554	10	2.33784e-25	0.00015397	-0.154279	-0.111657	cg23763137	TSS200	ADORA2A	BS	shelf	NA
4	chr22	24822802	24823554	10	2.33784e-25	0.00015397	-0.154279	-0.111657	cg20660269	TSS200	ADORA2A	BS	shelf	NA
4	chr22	24822802	24823554	10	2.33784e-25	0.00015397	-0.154279	-0.111657	cg02237342	TSS200	ADORA2A	BS	shelf	NA
5	chr14	101525995	101527144	14	1.5095e-20	0.000222002	-0.237913	-0.13582	cg14355941	TSS1500	MIR496	5hmC, BS	open sea	NA
5	chr14	101525995	101527144	14	1.5095e-20	0.000222002	-0.237913	-0.13582	cg02883666	TSS1500	MIR496	5hmC, BS	open sea	NA
5	chr14	101525995	101527144	14	1.5095e-20	0.000222002	-0.237913	-0.13582	cg19631264	TSS200	MIR496	BS	open sea	NA
5	chr14	101525995	101527144	14	1.5095e-20	0.000222002	-0.237913	-0.13582	cg26116969	TSS200	MIR496	BS	open sea	NA
5	chr14	101525995	101527144	14	1.5095e-20	0.000222002	-0.237913	-0.13582	cg15171962	TSS200	MIR496	BS	open sea	NA
5	chr14	101525995	101527144	14	1.5095e-20	0.000222002	-0.237913	-0.13582	cg21176597	TSS200	MIR496	BS	open sea	NA
5	chr14	101525995	101527144	14	1.5095e-20	0.000222002	-0.237913	-0.13582	cg23468699	TSS200;TSS1500	MIR496;MIR377	BS	open sea	NA
5	chr14	101525995	101527144	14	1.5095e-20	0.000222002	-0.237913	-0.13582	cg11869269	TSS1500	MIR377	BS	open sea	NA
5	chr14	101525995	101527144	14	1.5095e-20	0.000222002	-0.237913	-0.13582	cg20474788	TSS1500	MIR377	BS	open sea	NA
5	chr14	101525995	101527144	14	1.5095e-20	0.000222002	-0.237913	-0.13582	cg18588811	TSS1500	MIR377	BS	open sea	V$STAT_01
5	chr14	101525995	101527144	14	1.5095e-20	0.000222002	-0.237913	-0.13582	cg06753050	TSS1500;TSS200	MIR496;MIR154	5hmC	open sea	NA
5	chr14	101525995	101527144	14	1.5095e-20	0.000222002	-0.237913	-0.13582	cg05249271	TSS1500;TSS200	MIR496;MIR154	5hmC	open sea	NA
5	chr14	101525995	101527144	14	1.5095e-20	0.000222002	-0.237913	-0.13582	cg15508280	TSS1500;TSS200	MIR496;MIR154	5hmC	open sea	NA
5	chr14	101525995	101527144	14	1.5095e-20	0.000222002	-0.237913	-0.13582	cg09213165	Body;TSS1500	MIR154;MIR496	5hmC	open sea	NA
6	chr12	122711988	122712925	10	3.70322e-21	0.000276583	-0.225042	-0.148493	cg08622923	TSS200;TSS200;TSS200;TSS200	DIABLO;DIABLO;DIABLO;DIABLO	5hmC	shore	NA
6	chr12	122711988	122712925	10	3.70322e-21	0.000276583	-0.225042	-0.148493	cg14506192	Body;5'UTR;5'UTR;Body;1stExon;1stExon	DIABLO;DIABLO;DIABLO;DIABLO;DIABLO;DIABLO	5hmC	shore	NA
6	chr12	122711988	122712925	10	3.70322e-21	0.000276583	-0.225042	-0.148493	cg10802680	TSS200;TSS200;TSS200;TSS200	DIABLO;DIABLO;DIABLO;DIABLO	5hmC	shore	NA
6	chr12	122711988	122712925	10	3.70322e-21	0.000276583	-0.225042	-0.148493	cg14094409	TSS200;TSS200;TSS200;TSS200	DIABLO;DIABLO;DIABLO;DIABLO	5hmC	shore	NA
6	chr12	122711988	122712925	10	3.70322e-21	0.000276583	-0.225042	-0.148493	cg11804414	TSS200;TSS200;TSS200;TSS200	DIABLO;DIABLO;DIABLO;DIABLO	5hmC	shore	NA
6	chr12	122711988	122712925	10	3.70322e-21	0.000276583	-0.225042	-0.148493	cg21805118	TSS200;TSS200;TSS200;TSS200	DIABLO;DIABLO;DIABLO;DIABLO	5hmC	shore	NA
6	chr12	122711988	122712925	10	3.70322e-21	0.000276583	-0.225042	-0.148493	cg09123760	TSS200;TSS200;TSS200;TSS200	DIABLO;DIABLO;DIABLO;DIABLO	5hmC	shore	NA
6	chr12	122711988	122712925	10	3.70322e-21	0.000276583	-0.225042	-0.148493	cg13587802	TSS1500;TSS1500;TSS1500;TSS1500	DIABLO;DIABLO;DIABLO;DIABLO	5hmC	shore	NA
6	chr12	122711988	122712925	10	3.70322e-21	0.000276583	-0.225042	-0.148493	cg09736286	TSS1500;TSS1500;TSS1500;TSS1500	DIABLO;DIABLO;DIABLO;DIABLO		shore	NA
7	chr5	177811198	177811648	3	7.70943e-24	0.000420142	-0.325077	-0.227672	cg08930131	Body	COL23A1		open sea	NA
7	chr5	177811198	177811648	3	7.70943e-24	0.000420142	-0.325077	-0.227672	cg02087079	Body	COL23A1		open sea	NA
7	chr5	177811198	177811648	3	7.70943e-24	0.000420142	-0.325077	-0.227672	cg00234625	Body	COL23A1		open sea	NA
8	chr16	54227790	54228582	8	7.82935e-19	0.000428674	-0.167591	-0.0854351	cg27520536				island	NA
8	chr16	54227790	54228582	8	7.82935e-19	0.000428674	-0.167591	-0.0854351	cg27057022				shore	NA
8	chr16	54227790	54228582	8	7.82935e-19	0.000428674	-0.167591	-0.0854351	cg00647658				shore	NA
8	chr16	54227790	54228582	8	7.82935e-19	0.000428674	-0.167591	-0.0854351	cg05067427				shore	NA
8	chr16	54227790	54228582	8	7.82935e-19	0.000428674	-0.167591	-0.0854351	cg16500916				shore	NA
8	chr16	54227790	54228582	8	7.82935e-19	0.000428674	-0.167591	-0.0854351	cg03687532				island	NA
8	chr16	54227790	54228582	8	7.82935e-19	0.000428674	-0.167591	-0.0854351	cg07506749				island	NA
8	chr16	54227790	54228582	8	7.82935e-19	0.000428674	-0.167591	-0.0854351	cg05332854				shore	NA
9	chr11	597597	599090	9	4.70913e-28	0.000511179	-0.159197	-0.0785841	cg02461776	Body	PHRF1	BS	shore	NA
9	chr11	597597	599090	9	4.70913e-28	0.000511179	-0.159197	-0.0785841	cg07615816	Body	PHRF1	BS	shore	NA
9	chr11	597597	599090	9	4.70913e-28	0.000511179	-0.159197	-0.0785841	cg18766821	Body	PHRF1	BS	shore	NA
9	chr11	597597	599090	9	4.70913e-28	0.000511179	-0.159197	-0.0785841	cg14305262	Body	PHRF1	BS	shore	NA
9	chr11	597597	599090	9	4.70913e-28	0.000511179	-0.159197	-0.0785841	cg24052417	Body	PHRF1	BS	shore	NA
9	chr11	597597	599090	9	4.70913e-28	0.000511179	-0.159197	-0.0785841	cg12288982	Body	PHRF1	BS	shore	NA
9	chr11	597597	599090	9	4.70913e-28	0.000511179	-0.159197	-0.0785841	cg12921473	Body	PHRF1	BS	shore	NA
9	chr11	597597	599090	9	4.70913e-28	0.000511179	-0.159197	-0.0785841	cg03851192	Body	PHRF1		island	NA
9	chr11	597597	599090	9	4.70913e-28	0.000511179	-0.159197	-0.0785841	cg25300829	Body	PHRF1		island	NA
10	chr7	1718485	1718682	4	2.99974e-23	0.00057953	-0.242494	-0.191413	cg21151950				open sea	NA
10	chr7	1718485	1718682	4	2.99974e-23	0.00057953	-0.242494	-0.191413	cg06163738				open sea	NA
10	chr7	1718485	1718682	4	2.99974e-23	0.00057953	-0.242494	-0.191413	cg10032110				open sea	NA
10	chr7	1718485	1718682	4	2.99974e-23	0.00057953	-0.242494	-0.191413	cg19744326				open sea	NA
11	chr17	20798895	20799714	11	5.13663e-40	0.000721739	-0.219531	-0.112187	cg08288433	TSS200	CCDC144NL	5hmC	island	NA
11	chr17	20798895	20799714	11	5.13663e-40	0.000721739	-0.219531	-0.112187	cg06809326	TSS200	CCDC144NL	5hmC	island	NA
11	chr17	20798895	20799714	11	5.13663e-40	0.000721739	-0.219531	-0.112187	cg22570042	TSS200	CCDC144NL	5hmC	island	NA
11	chr17	20798895	20799714	11	5.13663e-40	0.000721739	-0.219531	-0.112187	cg21980100	TSS200	CCDC144NL	5hmC	island	NA
11	chr17	20798895	20799714	11	5.13663e-40	0.000721739	-0.219531	-0.112187	cg06633402	Body	CCDC144NL	5hmC	shore	NA
11	chr17	20798895	20799714	11	5.13663e-40	0.000721739	-0.219531	-0.112187	cg18251984	1stExon	CCDC144NL	5hmC	island	NA
11	chr17	20798895	20799714	11	5.13663e-40	0.000721739	-0.219531	-0.112187	cg08458692	1stExon;5'UTR	CCDC144NL;CCDC144NL	5hmC	island	NA
11	chr17	20798895	20799714	11	5.13663e-40	0.000721739	-0.219531	-0.112187	cg14560110	TSS200	CCDC144NL	5hmC	island	NA
11	chr17	20798895	20799714	11	5.13663e-40	0.000721739	-0.219531	-0.112187	cg22516161	TSS200	CCDC144NL	5hmC	island	NA
11	chr17	20798895	20799714	11	5.13663e-40	0.000721739	-0.219531	-0.112187	cg25893857	TSS1500	CCDC144NL	5hmC	island	NA
11	chr17	20798895	20799714	11	5.13663e-40	0.000721739	-0.219531	-0.112187	cg11633473	TSS1500	CCDC144NL	5hmC	island	NA
12	chr10	134993146	134994455	9	2.30023e-16	0.000729657	-0.143633	-0.115223	cg04939649	Body	KNDC1		shore	NA
12	chr10	134993146	134994455	9	2.30023e-16	0.000729657	-0.143633	-0.115223	cg24177611	Body	KNDC1		island	NA
12	chr10	134993146	134994455	9	2.30023e-16	0.000729657	-0.143633	-0.115223	cg00909156	Body	KNDC1		island	NA
12	chr10	134993146	134994455	9	2.30023e-16	0.000729657	-0.143633	-0.115223	cg20731384	Body	KNDC1		shore	NA
12	chr10	134993146	134994455	9	2.30023e-16	0.000729657	-0.143633	-0.115223	cg13609319	Body	KNDC1		shore	NA
12	chr10	134993146	134994455	9	2.30023e-16	0.000729657	-0.143633	-0.115223	cg18398637	Body	KNDC1		shore	NA
12	chr10	134993146	134994455	9	2.30023e-16	0.000729657	-0.143633	-0.115223	cg06517181	Body	KNDC1		shore	NA
12	chr10	134993146	134994455	9	2.30023e-16	0.000729657	-0.143633	-0.115223	cg08815970	Body	KNDC1		shore	NA
12	chr10	134993146	134994455	9	2.30023e-16	0.000729657	-0.143633	-0.115223	cg09274040	Body	KNDC1		shore	NA
13	chr22	42548356	42549153	5	1.01411e-15	0.00081655	-0.175393	-0.14354	cg05082376				island	NA
13	chr22	42548356	42549153	5	1.01411e-15	0.00081655	-0.175393	-0.14354	cg17050807				island	NA
13	chr22	42548356	42549153	5	1.01411e-15	0.00081655	-0.175393	-0.14354	cg15557168				island	NA
13	chr22	42548356	42549153	5	1.01411e-15	0.00081655	-0.175393	-0.14354	cg13677785				island	NA
13	chr22	42548356	42549153	5	1.01411e-15	0.00081655	-0.175393	-0.14354	cg15128208				island	NA
14	chr14	105359836	105360327	5	2.76372e-25	0.00100475	-0.319354	-0.15159	cg10289790	Body;Body	KIAA0284;KIAA0284	5hmC	island	NA
14	chr14	105359836	105360327	5	2.76372e-25	0.00100475	-0.319354	-0.15159	cg15297752	Body;Body	KIAA0284;KIAA0284	5hmC	island	NA
14	chr14	105359836	105360327	5	2.76372e-25	0.00100475	-0.319354	-0.15159	cg11121935	Body;Body	KIAA0284;KIAA0284	5hmC	island	NA
14	chr14	105359836	105360327	5	2.76372e-25	0.00100475	-0.319354	-0.15159	cg06887444	Body;Body	KIAA0284;KIAA0284	5hmC	island	NA
14	chr14	105359836	105360327	5	2.76372e-25	0.00100475	-0.319354	-0.15159	cg25073967	Body;Body	KIAA0284;KIAA0284	5hmC	shore	NA
15	chr4	3043019	3043752	4	1.021e-17	0.00120847	-0.171263	-0.117443	cg14003022				island	NA
15	chr4	3043019	3043752	4	1.021e-17	0.00120847	-0.171263	-0.117443	cg02566259				island	NA
15	chr4	3043019	3043752	4	1.021e-17	0.00120847	-0.171263	-0.117443	cg01807241				island	NA
15	chr4	3043019	3043752	4	1.021e-17	0.00120847	-0.171263	-0.117443	cg06421590				shore	NA
16	chr10	99338056	99338240	4	8.97816e-18	0.00143052	-0.19556	-0.132687	cg27469738	Body;Body	ANKRD2;ANKRD2		island	NA
16	chr10	99338056	99338240	4	8.97816e-18	0.00143052	-0.19556	-0.132687	cg25397029	Body;Body	ANKRD2;ANKRD2		island	NA
16	chr10	99338056	99338240	4	8.97816e-18	0.00143052	-0.19556	-0.132687	cg13994504	Body;Body	ANKRD2;ANKRD2		island	NA
17	chr10	105232723	105233423	6	7.87761e-13	0.00144397	-0.180715	-0.145818	cg08942004	3'UTR	CALHM3		shore	NA
17	chr10	105232723	105233423	6	7.87761e-13	0.00144397	-0.180715	-0.145818	cg20017132	Body	CALHM3		island	NA
17	chr10	105232723	105233423	6	7.87761e-13	0.00144397	-0.180715	-0.145818	cg17159890	Body	CALHM3		island	NA
17	chr10	105232723	105233423	6	7.87761e-13	0.00144397	-0.180715	-0.145818	cg15452135	Body	CALHM3		island	NA
17	chr10	105232723	105233423	6	7.87761e-13	0.00144397	-0.180715	-0.145818	cg06859037	Body	CALHM3		island	NA
17	chr10	105232723	105233423	6	7.87761e-13	0.00144397	-0.180715	-0.145818	cg23603852	Body	CALHM3		island	NA
18	chr16	2131718	2132527	6	1.06658e-12	0.00181384	-0.0955588	-0.0766317	cg26688936	Body;Body;Body	TSC2;TSC2;TSC2		shelf	NA
18	chr16	2131718	2132527	6	1.06658e-12	0.00181384	-0.0955588	-0.0766317	cg04725426	Body;Body;Body	TSC2;TSC2;TSC2		shelf	NA
18	chr16	2131718	2132527	6	1.06658e-12	0.00181384	-0.0955588	-0.0766317	cg08779982	Body;Body;Body	TSC2;TSC2;TSC2		shelf	NA
18	chr16	2131718	2132527	6	1.06658e-12	0.00181384	-0.0955588	-0.0766317	cg02504384	Body;Body;Body	TSC2;TSC2;TSC2		shelf	NA
18	chr16	2131718	2132527	6	1.06658e-12	0.00181384	-0.0955588	-0.0766317	cg06330323	Body;Body;Body	TSC2;TSC2;TSC2		shore	NA
18	chr16	2131718	2132527	6	1.06658e-12	0.00181384	-0.0955588	-0.0766317	cg02364279	Body;Body;Body	TSC2;TSC2;TSC2		shore	NA
19	chr5	180047407	180048893	5	9.04598e-35	0.00182684	-0.289903	-0.172815	cg18719563	Body;Body	FLT4;FLT4	5hmC	island	NA
19	chr5	180047407	180048893	5	9.04598e-35	0.00182684	-0.289903	-0.172815	cg06077821	Body;Body	FLT4;FLT4	5hmC	island	NA
19	chr5	180047407	180048893	5	9.04598e-35	0.00182684	-0.289903	-0.172815	cg07263853	Body;Body	FLT4;FLT4		island	NA
19	chr5	180047407	180048893	5	9.04598e-35	0.00182684	-0.289903	-0.172815	cg20746634	Body;Body	FLT4;FLT4		island	NA
19	chr5	180047407	180048893	5	9.04598e-35	0.00182684	-0.289903	-0.172815	cg00866500	Body;Body	FLT4;FLT4		island	NA
20	chr2	242811149	242811962	6	5.6886e-16	0.00187283	-0.140085	-0.0576931	cg22924060	TSS200	C2orf85		shelf	NA
20	chr2	242811149	242811962	6	5.6886e-16	0.00187283	-0.140085	-0.0576931	cg23491841	TSS1500	C2orf85		shelf	NA
20	chr2	242811149	242811962	6	5.6886e-16	0.00187283	-0.140085	-0.0576931	cg24290756	TSS1500	C2orf85		shelf	NA
20	chr2	242811149	242811962	6	5.6886e-16	0.00187283	-0.140085	-0.0576931	cg03170013	TSS200	C2orf85		shelf	NA
20	chr2	242811149	242811962	6	5.6886e-16	0.00187283	-0.140085	-0.0576931	cg27628891	TSS200	C2orf85		shelf	NA
20	chr2	242811149	242811962	6	5.6886e-16	0.00187283	-0.140085	-0.0576931	cg27490404	1stExon	C2orf85		shelf	NA
21	chr16	314666	314811	2	1.14847e-27	0.00209036	-0.187961	-0.182531	cg08713437	Body	ITFG3	5hmC	shelf	NA
21	chr16	314666	314811	2	1.14847e-27	0.00209036	-0.187961	-0.182531	cg00418913	Body	ITFG3	5hmC	shelf	V$PAX5_02
22	chr9	140172631	140173956	5	2.33529e-14	0.00216358	-0.173474	-0.133455	cg07717632	5'UTR	C9orf167	BS	island	NA
22	chr9	140172631	140173956	5	2.33529e-14	0.00216358	-0.173474	-0.133455	cg09381737	Body	C9orf167	BS	island	NA
22	chr9	140172631	140173956	5	2.33529e-14	0.00216358	-0.173474	-0.133455	cg14409810	5'UTR	C9orf167	BS	island	NA
22	chr9	140172631	140173956	5	2.33529e-14	0.00216358	-0.173474	-0.133455	cg14018215	Body	C9orf167	BS	island	NA
22	chr9	140172631	140173956	5	2.33529e-14	0.00216358	-0.173474	-0.133455	cg02219116	Body	C9orf167	BS	island	NA
23	chr7	4174939	4175865	8	2.89762e-14	0.00255886	-0.209026	-0.130113	cg10795342	Body;Body	SDK1;SDK1		open sea	NA
23	chr7	4174939	4175865	8	2.89762e-14	0.00255886	-0.209026	-0.130113	cg25596006	Body;Body	SDK1;SDK1		open sea	NA
23	chr7	4174939	4175865	8	2.89762e-14	0.00255886	-0.209026	-0.130113	cg07926598	Body;Body	SDK1;SDK1		open sea	NA
23	chr7	4174939	4175865	8	2.89762e-14	0.00255886	-0.209026	-0.130113	cg19691505	Body;Body	SDK1;SDK1		open sea	NA
23	chr7	4174939	4175865	8	2.89762e-14	0.00255886	-0.209026	-0.130113	cg01667575	Body;Body	SDK1;SDK1		open sea	NA
23	chr7	4174939	4175865	8	2.89762e-14	0.00255886	-0.209026	-0.130113	cg11780546	Body;Body	SDK1;SDK1		open sea	NA
23	chr7	4174939	4175865	8	2.89762e-14	0.00255886	-0.209026	-0.130113	cg06621691	Body;Body	SDK1;SDK1		open sea	NA
23	chr7	4174939	4175865	8	2.89762e-14	0.00255886	-0.209026	-0.130113	cg13153353	Body;Body	SDK1;SDK1		open sea	NA
24	chr12	4554295	4555311	13	3.0735e-21	0.00277826	-0.168916	-0.0840731	cg25948690	1stExon	FGF6		island	V$AHRARNT_01
24	chr12	4554295	4555311	13	3.0735e-21	0.00277826	-0.168916	-0.0840731	cg01731341	Body	FGF6		shore	NA
24	chr12	4554295	4555311	13	3.0735e-21	0.00277826	-0.168916	-0.0840731	cg16927811	1stExon	FGF6		island	NA
24	chr12	4554295	4555311	13	3.0735e-21	0.00277826	-0.168916	-0.0840731	cg07919028	1stExon	FGF6		island	NA
24	chr12	4554295	4555311	13	3.0735e-21	0.00277826	-0.168916	-0.0840731	cg25360518	1stExon	FGF6		island	NA
24	chr12	4554295	4555311	13	3.0735e-21	0.00277826	-0.168916	-0.0840731	cg15985470	5'UTR;1stExon	FGF6;FGF6		shore	V$MYOGNF1_01;V$ARNT_01;V$MYCMAX_01;V$NMYC_01;V$USF_C
24	chr12	4554295	4555311	13	3.0735e-21	0.00277826	-0.168916	-0.0840731	cg21902327	TSS200	FGF6		shore	V$MEF2_01
24	chr12	4554295	4555311	13	3.0735e-21	0.00277826	-0.168916	-0.0840731	cg07307789	TSS200	FGF6		shore	NA
24	chr12	4554295	4555311	13	3.0735e-21	0.00277826	-0.168916	-0.0840731	cg08957683	TSS200	FGF6		shore	NA
24	chr12	4554295	4555311	13	3.0735e-21	0.00277826	-0.168916	-0.0840731	cg24965248	TSS200	FGF6		shore	NA
24	chr12	4554295	4555311	13	3.0735e-21	0.00277826	-0.168916	-0.0840731	cg19018201	TSS200	FGF6		shore	NA
24	chr12	4554295	4555311	13	3.0735e-21	0.00277826	-0.168916	-0.0840731	cg08289700	TSS200	FGF6		shore	NA
24	chr12	4554295	4555311	13	3.0735e-21	0.00277826	-0.168916	-0.0840731	cg02583247	TSS1500	FGF6		shore	NA
25	chr15	69325271	69325560	5	5.18685e-12	0.00281228	-0.369433	-0.248815	cg02670903	Body;Body	MIR548H4;NOX5	BS	island	NA
25	chr15	69325271	69325560	5	5.18685e-12	0.00281228	-0.369433	-0.248815	cg27118929	Body;Body	MIR548H4;NOX5	BS	shore	NA
25	chr15	69325271	69325560	5	5.18685e-12	0.00281228	-0.369433	-0.248815	cg19461383	Body;Body	MIR548H4;NOX5	BS	island	NA
25	chr15	69325271	69325560	5	5.18685e-12	0.00281228	-0.369433	-0.248815	cg22952917	Body;Body	MIR548H4;NOX5	BS	island	NA
25	chr15	69325271	69325560	5	5.18685e-12	0.00281228	-0.369433	-0.248815	cg06680906	Body;Body	MIR548H4;NOX5	BS	island	NA
26	chr19	51587102	51587945	3	7.54619e-12	0.00283828	-0.149492	-0.0563651	cg25263454	1stExon;5'UTR	KLK14;KLK14	5hmC	open sea	NA
26	chr19	51587102	51587945	3	7.54619e-12	0.00283828	-0.149492	-0.0563651	cg24425175	TSS1500	KLK14	5hmC	open sea	NA
26	chr19	51587102	51587945	3	7.54619e-12	0.00283828	-0.149492	-0.0563651	cg12683641	5'UTR	KLK14		open sea	NA
27	chr19	49054962	49055443	7	3.3421e-11	0.00288649	-0.177125	-0.0908634	cg12250421	TSS1500	SULT2B1	5hmC	open sea	NA
27	chr19	49054962	49055443	7	3.3421e-11	0.00288649	-0.177125	-0.0908634	cg15149098	TSS1500	SULT2B1	5hmC	open sea	NA
27	chr19	49054962	49055443	7	3.3421e-11	0.00288649	-0.177125	-0.0908634	cg03039843	TSS200	SULT2B1	5hmC	open sea	NA
27	chr19	49054962	49055443	7	3.3421e-11	0.00288649	-0.177125	-0.0908634	cg23097961	TSS200	SULT2B1	5hmC	open sea	NA
27	chr19	49054962	49055443	7	3.3421e-11	0.00288649	-0.177125	-0.0908634	cg00698688	1stExon;5'UTR	SULT2B1;SULT2B1	5hmC	open sea	NA
27	chr19	49054962	49055443	7	3.3421e-11	0.00288649	-0.177125	-0.0908634	cg08151612	1stExon;5'UTR	SULT2B1;SULT2B1	5hmC	open sea	NA
27	chr19	49054962	49055443	7	3.3421e-11	0.00288649	-0.177125	-0.0908634	cg07543967	1stExon;5'UTR	SULT2B1;SULT2B1	5hmC	open sea	V$AREB6_03
28	chr4	69435250	69435601	3	3.11055e-12	0.00296367	-0.31217	-0.178598	cg07973162	TSS1500;TSS1500	UGT2B15;UGT2B17	BS	open sea	NA
28	chr4	69435250	69435601	3	3.11055e-12	0.00296367	-0.31217	-0.178598	cg07952421	TSS1500;TSS1500	UGT2B15;UGT2B17	BS	open sea	NA
28	chr4	69435250	69435601	3	3.11055e-12	0.00296367	-0.31217	-0.178598	cg10632656	TSS1500;TSS1500	UGT2B15;UGT2B17	BS	open sea	NA
29	chr2	3285967	3286479	4	1.71503e-16	0.00300737	-0.0825196	-0.0416922	cg03646994	Body	TSSC1		shore	NA
29	chr2	3285967	3286479	4	1.71503e-16	0.00300737	-0.0825196	-0.0416922	cg15775218	Body	TSSC1		island	NA
29	chr2	3285967	3286479	4	1.71503e-16	0.00300737	-0.0825196	-0.0416922	cg25411977	Body	TSSC1		island	NA
29	chr2	3285967	3286479	4	1.71503e-16	0.00300737	-0.0825196	-0.0416922	cg15913725	Body	TSSC1		island	NA
30	chr19	43857717	43858174	4	2.26881e-16	0.00304716	-0.14174	-0.0899065	cg11906444	Body	CD177		open sea	NA
30	chr19	43857717	43858174	4	2.26881e-16	0.00304716	-0.14174	-0.0899065	cg15742245	TSS200	CD177		open sea	NA
30	chr19	43857717	43858174	4	2.26881e-16	0.00304716	-0.14174	-0.0899065	cg14101398	1stExon;5'UTR	CD177;CD177		open sea	NA
30	chr19	43857717	43858174	4	2.26881e-16	0.00304716	-0.14174	-0.0899065	cg05275595	1stExon	CD177		open sea	NA
31	chr8	19468450	19468555	2	8.83675e-16	0.00309767	-0.256478	-0.20682	cg17190363	Body;5'UTR	CSGALNACT1;CSGALNACT1		open sea	NA
31	chr8	19468450	19468555	2	8.83675e-16	0.00309767	-0.256478	-0.20682	cg03957420	Body;5'UTR	CSGALNACT1;CSGALNACT1		open sea	NA
32	chr6	168857165	168858078	5	8.08213e-17	0.0031065	-0.17499	-0.127261	cg13705956	Body;Body	SMOC2;SMOC2	5hmC	open sea	NA
32	chr6	168857165	168858078	5	8.08213e-17	0.0031065	-0.17499	-0.127261	cg16588799	Body;Body	SMOC2;SMOC2	5hmC	open sea	NA
32	chr6	168857165	168858078	5	8.08213e-17	0.0031065	-0.17499	-0.127261	cg16053651	Body;Body	SMOC2;SMOC2	5hmC	open sea	NA
32	chr6	168857165	168858078	5	8.08213e-17	0.0031065	-0.17499	-0.127261	cg20045841	Body;Body	SMOC2;SMOC2		open sea	NA
32	chr6	168857165	168858078	5	8.08213e-17	0.0031065	-0.17499	-0.127261	cg18996760	Body;Body	SMOC2;SMOC2		open sea	NA
33	chr4	3425256	3426150	5	4.53106e-13	0.00313112	-0.168378	-0.103132	cg21601032	Body;Body;Body	RGS12;RGS12;RGS12		open sea	NA
33	chr4	3425256	3426150	5	4.53106e-13	0.00313112	-0.168378	-0.103132	cg04641962	Body;Body;Body	RGS12;RGS12;RGS12		open sea	V$MEIS1AHOXA9_01
33	chr4	3425256	3426150	5	4.53106e-13	0.00313112	-0.168378	-0.103132	cg18447232	Body;Body;Body	RGS12;RGS12;RGS12		open sea	NA
33	chr4	3425256	3426150	5	4.53106e-13	0.00313112	-0.168378	-0.103132	cg26106417	Body;Body;Body	RGS12;RGS12;RGS12		open sea	NA
33	chr4	3425256	3426150	5	4.53106e-13	0.00313112	-0.168378	-0.103132	cg15111822	Body;Body;Body	RGS12;RGS12;RGS12		open sea	NA
33	chr4	3425256	3426150	5	4.53106e-13	0.00313112	-0.168378	-0.103132	cg18194738	Body;Body;Body	RGS12;RGS12;RGS12		open sea	NA
34	chr8	22078982	22079882	7	9.12565e-14	0.00336113	-0.114104	-0.0793718	cg04011470	Body;Body	PHYHIP;PHYHIP		island	NA
34	chr8	22078982	22079882	7	9.12565e-14	0.00336113	-0.114104	-0.0793718	cg07438238	Body;Body	PHYHIP;PHYHIP		shore	NA
34	chr8	22078982	22079882	7	9.12565e-14	0.00336113	-0.114104	-0.0793718	cg01894631	Body;Body	PHYHIP;PHYHIP		island	NA
34	chr8	22078982	22079882	7	9.12565e-14	0.00336113	-0.114104	-0.0793718	cg17481197	Body;Body	PHYHIP;PHYHIP		island	NA
34	chr8	22078982	22079882	7	9.12565e-14	0.00336113	-0.114104	-0.0793718	cg07200386	Body;Body	PHYHIP;PHYHIP		island	NA
34	chr8	22078982	22079882	7	9.12565e-14	0.00336113	-0.114104	-0.0793718	cg00575769	Body;Body	PHYHIP;PHYHIP		island	NA
34	chr8	22078982	22079882	7	9.12565e-14	0.00336113	-0.114104	-0.0793718	cg20086660	Body;Body	PHYHIP;PHYHIP		shore	NA
35	chr11	1007218	1008337	6	2.57577e-14	0.0033934	-0.163778	-0.118114	cg19851113	Body	AP2A2	5hmC	island	NA
35	chr11	1007218	1008337	6	2.57577e-14	0.0033934	-0.163778	-0.118114	cg25073705	Body	AP2A2	5hmC	island	NA
35	chr11	1007218	1008337	6	2.57577e-14	0.0033934	-0.163778	-0.118114	cg14389139	Body	AP2A2		shore	NA
35	chr11	1007218	1008337	6	2.57577e-14	0.0033934	-0.163778	-0.118114	cg17676835	Body	AP2A2		shore	NA
35	chr11	1007218	1008337	6	2.57577e-14	0.0033934	-0.163778	-0.118114	cg15908627	Body	AP2A2		shore	NA
35	chr11	1007218	1008337	6	2.57577e-14	0.0033934	-0.163778	-0.118114	cg08134592	Body	AP2A2		shore	NA
36	chr21	36164119	36164414	4	5.68101e-12	0.00343462	-0.225126	-0.153288	cg27211894	3'UTR;3'UTR	RUNX1;RUNX1	BS	island	NA
36	chr21	36164119	36164414	4	5.68101e-12	0.00343462	-0.225126	-0.153288	cg24336374	3'UTR;3'UTR	RUNX1;RUNX1	BS	shore	NA
36	chr21	36164119	36164414	4	5.68101e-12	0.00343462	-0.225126	-0.153288	cg06862831	3'UTR;3'UTR	RUNX1;RUNX1	BS	island	NA
36	chr21	36164119	36164414	4	5.68101e-12	0.00343462	-0.225126	-0.153288	cg16507755	3'UTR;3'UTR	RUNX1;RUNX1	BS	island	NA
37	chr8	141248632	141249567	5	1.18027e-12	0.00364692	-0.105875	-0.0680985	cg03918756	Body;Body	TRAPPC9;TRAPPC9		open sea	NA
37	chr8	141248632	141249567	5	1.18027e-12	0.00364692	-0.105875	-0.0680985	cg23401796	Body;Body	TRAPPC9;TRAPPC9		open sea	NA
37	chr8	141248632	141249567	5	1.18027e-12	0.00364692	-0.105875	-0.0680985	cg11152943	Body;Body	TRAPPC9;TRAPPC9		open sea	NA
37	chr8	141248632	141249567	5	1.18027e-12	0.00364692	-0.105875	-0.0680985	cg25229048	Body;Body	TRAPPC9;TRAPPC9		open sea	NA
37	chr8	141248632	141249567	5	1.18027e-12	0.00364692	-0.105875	-0.0680985	cg08504029	Body;Body	TRAPPC9;TRAPPC9		open sea	NA
38	chr16	87738756	87739453	6	8.25096e-21	0.00368963	-0.0942777	-0.0526884	cg06908618	TSS200	LOC100129637		shore	NA
38	chr16	87738756	87739453	6	8.25096e-21	0.00368963	-0.0942777	-0.0526884	cg09891393	Body	LOC100129637		island	NA
38	chr16	87738756	87739453	6	8.25096e-21	0.00368963	-0.0942777	-0.0526884	cg04145522	Body	LOC100129637		island	NA
38	chr16	87738756	87739453	6	8.25096e-21	0.00368963	-0.0942777	-0.0526884	cg01624637	TSS200	LOC100129637		shore	NA
38	chr16	87738756	87739453	6	8.25096e-21	0.00368963	-0.0942777	-0.0526884	cg27338807	TSS200	LOC100129637		shore	NA
38	chr16	87738756	87739453	6	8.25096e-21	0.00368963	-0.0942777	-0.0526884	cg03579904	TSS200	LOC100129637		shore	NA
39	chr4	3413683	3414302	3	2.48953e-16	0.00378388	-0.155199	-0.137488	cg23030040	Body;Body;Body	RGS12;RGS12;RGS12		shore	NA
39	chr4	3413683	3414302	3	2.48953e-16	0.00378388	-0.155199	-0.137488	cg19396363	Body;Body;Body	RGS12;RGS12;RGS12		shore	NA
39	chr4	3413683	3414302	3	2.48953e-16	0.00378388	-0.155199	-0.137488	cg07891069	Body;Body;Body	RGS12;RGS12;RGS12		shore	NA
40	chr16	938049	938681	4	5.68034e-15	0.00379902	-0.192455	-0.136839	cg07377859	Body	LMF1		open sea	NA
40	chr16	938049	938681	4	5.68034e-15	0.00379902	-0.192455	-0.136839	cg04682685	Body	LMF1		open sea	NA
40	chr16	938049	938681	4	5.68034e-15	0.00379902	-0.192455	-0.136839	cg10301401	Body	LMF1		open sea	NA
40	chr16	938049	938681	4	5.68034e-15	0.00379902	-0.192455	-0.136839	cg02094810	Body	LMF1		open sea	NA
41	chr10	134895446	134896478	4	6.12392e-13	0.00380695	-0.149591	-0.112363	cg14503168			5hmC	shore	NA
41	chr10	134895446	134896478	4	6.12392e-13	0.00380695	-0.149591	-0.112363	cg11028710			5hmC	shore	NA
41	chr10	134895446	134896478	4	6.12392e-13	0.00380695	-0.149591	-0.112363	cg11368900				shore	NA
41	chr10	134895446	134896478	4	6.12392e-13	0.00380695	-0.149591	-0.112363	cg24345639				shore	NA
42	chr8	144808965	144811385	9	1.68008e-30	0.00383142	-0.308712	-0.124957	cg01612292	Body	FAM83H	5hmC	island	NA
42	chr8	144808965	144811385	9	1.68008e-30	0.00383142	-0.308712	-0.124957	cg07962934	Body	FAM83H	5hmC	island	NA
42	chr8	144808965	144811385	9	1.68008e-30	0.00383142	-0.308712	-0.124957	cg25468618	Body	FAM83H	5hmC	island	NA
42	chr8	144808965	144811385	9	1.68008e-30	0.00383142	-0.308712	-0.124957	cg13911690	Body	FAM83H		island	NA
42	chr8	144808965	144811385	9	1.68008e-30	0.00383142	-0.308712	-0.124957	cg09380067	Body	FAM83H		island	NA
42	chr8	144808965	144811385	9	1.68008e-30	0.00383142	-0.308712	-0.124957	cg01399317	Body	FAM83H		island	V$E47_01
42	chr8	144808965	144811385	9	1.68008e-30	0.00383142	-0.308712	-0.124957	cg13735469	Body	FAM83H		island	NA
42	chr8	144808965	144811385	9	1.68008e-30	0.00383142	-0.308712	-0.124957	cg20519035	Body	FAM83H		island	NA
42	chr8	144808965	144811385	9	1.68008e-30	0.00383142	-0.308712	-0.124957	cg22054580	Body	FAM83H		island	NA
43	chr17	80573287	80573887	3	4.54934e-15	0.0038944	-0.148669	-0.0878553	cg25363258	3'UTR	WDR45L		shore	NA
43	chr17	80573287	80573887	3	4.54934e-15	0.0038944	-0.148669	-0.0878553	cg12167135	Body	WDR45L		shelf	NA
43	chr17	80573287	80573887	3	4.54934e-15	0.0038944	-0.148669	-0.0878553	cg14060471	3'UTR	WDR45L		shore	NA
44	chr16	58545346	58545502	3	5.31771e-17	0.00394265	-0.104429	-0.0853176	cg09217878	Body;Body;Body	NDRG4;NDRG4;NDRG4		shelf	NA
44	chr16	58545346	58545502	3	5.31771e-17	0.00394265	-0.104429	-0.0853176	cg00581595	Body;Body;Body	NDRG4;NDRG4;NDRG4		shelf	NA
44	chr16	58545346	58545502	3	5.31771e-17	0.00394265	-0.104429	-0.0853176	cg04194840	3'UTR;3'UTR;3'UTR	NDRG4;NDRG4;NDRG4		shelf	NA
45	chr13	53507972	53508092	3	2.2992e-11	0.00395217	-0.156683	-0.116753	cg08903619				open sea	NA
45	chr13	53507972	53508092	3	2.2992e-11	0.00395217	-0.156683	-0.116753	cg03562855				open sea	NA
45	chr13	53507972	53508092	3	2.2992e-11	0.00395217	-0.156683	-0.116753	cg01199793				open sea	NA
46	chr2	10559669	10559952	2	2.04963e-16	0.00399309	-0.12662	-0.111473	cg11456513	5'UTR;5'UTR	HPCAL1;HPCAL1		shore	NA
46	chr2	10559669	10559952	2	2.04963e-16	0.00399309	-0.12662	-0.111473	cg24271378	5'UTR;5'UTR	HPCAL1;HPCAL1		island	NA
46	chr2	10559669	10559952	2	2.04963e-16	0.00399309	-0.12662	-0.111473	cg11074834	Body;Body	HPCAL1;HPCAL1		island	NA
47	chr1	897308	897590	3	7.22538e-14	0.00401959	-0.146995	-0.142384	cg16968662	Body	KLHL17		island	NA
47	chr1	897308	897590	3	7.22538e-14	0.00401959	-0.146995	-0.142384	cg07696918	Body	KLHL17		island	NA
47	chr1	897308	897590	3	7.22538e-14	0.00401959	-0.146995	-0.142384	cg04359978	Body	KLHL17		island	NA
48	chr16	6623995	6624293	4	9.18354e-11	0.00412298	-0.119867	-0.0884017	cg16427239	5'UTR;5'UTR	A2BP1;A2BP1		open sea	NA
48	chr16	6623995	6624293	4	9.18354e-11	0.00412298	-0.119867	-0.0884017	cg01914555	5'UTR;5'UTR	A2BP1;A2BP1		open sea	NA
48	chr16	6623995	6624293	4	9.18354e-11	0.00412298	-0.119867	-0.0884017	cg06560026	5'UTR;5'UTR	A2BP1;A2BP1		open sea	NA
48	chr16	6623995	6624293	4	9.18354e-11	0.00412298	-0.119867	-0.0884017	cg07891288	5'UTR;5'UTR	A2BP1;A2BP1		open sea	NA
49	chr19	899547	899652	3	7.02172e-12	0.00419367	-0.140161	-0.124145	cg25814612	Body	C19orf22		island	NA
49	chr19	899547	899652	3	7.02172e-12	0.00419367	-0.140161	-0.124145	cg06315884	Body	C19orf22		island	NA
49	chr19	899547	899652	3	7.02172e-12	0.00419367	-0.140161	-0.124145	cg16709214	Body	C19orf22		island	NA
50	chr19	47969156	47969574	4	3.32525e-11	0.0043272	-0.169853	-0.110432	cg10786489	Body	SLC8A2		island	NA
50	chr19	47969156	47969574	4	3.32525e-11	0.0043272	-0.169853	-0.110432	cg09243106	Body	SLC8A2		island	NA
50	chr19	47969156	47969574	4	3.32525e-11	0.0043272	-0.169853	-0.110432	cg11328253	Body	SLC8A2		island	NA
50	chr19	47969156	47969574	4	3.32525e-11	0.0043272	-0.169853	-0.110432	cg11977139	Body	SLC8A2		shore	NA
51	chr19	710823	711001	3	2.68985e-12	0.00436258	-0.0456982	-0.033751	cg19925025	Body;Body	PALM;PALM		island	NA
51	chr19	710823	711001	3	2.68985e-12	0.00436258	-0.0456982	-0.033751	cg05913684	Body;Body	PALM;PALM		island	NA
51	chr19	710823	711001	3	2.68985e-12	0.00436258	-0.0456982	-0.033751	cg20631351	Body;Body	PALM;PALM		island	NA
52	chr7	50468399	50469042	3	1.39605e-13	0.00438081	-0.105283	-0.0912983	cg23720063	3'UTR	IKZF1		shore	NA
52	chr7	50468399	50469042	3	1.39605e-13	0.00438081	-0.105283	-0.0912983	cg18044562	3'UTR	IKZF1		island	NA
52	chr7	50468399	50469042	3	1.39605e-13	0.00438081	-0.105283	-0.0912983	cg26789038	3'UTR	IKZF1		shore	NA
53	chr19	35786580	35787193	5	5.00005e-14	0.00443676	0.162239	0.105058	cg11902728	Body;Body	MAG;MAG		island	V$MYCMAX_03;V$ARNT_02;V$MAX_01;V$NMYC_01
53	chr19	35786580	35787193	5	5.00005e-14	0.00443676	0.162239	0.105058	cg22266001	Body;Body	MAG;MAG		island	NA
53	chr19	35786580	35787193	5	5.00005e-14	0.00443676	0.162239	0.105058	cg15005368	Body;Body	MAG;MAG		island	NA
53	chr19	35786580	35787193	5	5.00005e-14	0.00443676	0.162239	0.105058	cg02127209	Body;Body	MAG;MAG		island	NA
53	chr19	35786580	35787193	5	5.00005e-14	0.00443676	0.162239	0.105058	cg18155720	Body;Body	MAG;MAG		shore	NA
54	chr7	157624788	157624958	3	6.26101e-17	0.00444011	-0.086156	-0.0585408	cg20083900	Body;Body;Body	PTPRN2;PTPRN2;PTPRN2		open sea	NA
54	chr7	157624788	157624958	3	6.26101e-17	0.00444011	-0.086156	-0.0585408	cg07176561	Body;Body;Body	PTPRN2;PTPRN2;PTPRN2		open sea	NA
54	chr7	157624788	157624958	3	6.26101e-17	0.00444011	-0.086156	-0.0585408	cg20717798	Body;Body;Body	PTPRN2;PTPRN2;PTPRN2		open sea	NA
55	chr7	157691177	157691684	6	2.05637e-13	0.00449631	-0.220679	-0.1001	cg19128364	Body;Body;Body	PTPRN2;PTPRN2;PTPRN2		shore	NA
55	chr7	157691177	157691684	6	2.05637e-13	0.00449631	-0.220679	-0.1001	cg09377301	Body;Body;Body	PTPRN2;PTPRN2;PTPRN2		shore	NA
55	chr7	157691177	157691684	6	2.05637e-13	0.00449631	-0.220679	-0.1001	cg13696531	Body;Body;Body	PTPRN2;PTPRN2;PTPRN2		shore	NA
55	chr7	157691177	157691684	6	2.05637e-13	0.00449631	-0.220679	-0.1001	cg01262413	Body;Body;Body	PTPRN2;PTPRN2;PTPRN2		shore	NA
55	chr7	157691177	157691684	6	2.05637e-13	0.00449631	-0.220679	-0.1001	cg09193751	Body;Body;Body	PTPRN2;PTPRN2;PTPRN2		shore	NA
55	chr7	157691177	157691684	6	2.05637e-13	0.00449631	-0.220679	-0.1001	cg25858232	Body;Body;Body	PTPRN2;PTPRN2;PTPRN2		shore	NA
56	chr17	78896012	78897137	7	1.23868e-22	0.00453007	-0.184801	-0.0897239	cg21734751	Body;Body	RPTOR;RPTOR	5hmC	island	NA
56	chr17	78896012	78897137	7	1.23868e-22	0.00453007	-0.184801	-0.0897239	cg17052885	Body;Body	RPTOR;RPTOR	5hmC	shore	NA
56	chr17	78896012	78897137	7	1.23868e-22	0.00453007	-0.184801	-0.0897239	cg12044293	Body;Body	RPTOR;RPTOR	5hmC	island	NA
56	chr17	78896012	78897137	7	1.23868e-22	0.00453007	-0.184801	-0.0897239	cg17144164	Body;Body	RPTOR;RPTOR	5hmC	island	NA
56	chr17	78896012	78897137	7	1.23868e-22	0.00453007	-0.184801	-0.0897239	cg24744721	Body;Body	RPTOR;RPTOR	5hmC	shore	NA
56	chr17	78896012	78897137	7	1.23868e-22	0.00453007	-0.184801	-0.0897239	cg06358794	Body;Body	RPTOR;RPTOR	5hmC	shore	NA
56	chr17	78896012	78897137	7	1.23868e-22	0.00453007	-0.184801	-0.0897239	cg26290973	Body;Body	RPTOR;RPTOR	5hmC	shore	NA
57	chr7	1062212	1063357	10	3.43303e-24	0.00453187	-0.114845	-0.0495737	cg10089657	Body;TSS200;Body;Body	C7orf50;MIR339;C7orf50;C7orf50		island	NA
57	chr7	1062212	1063357	10	3.43303e-24	0.00453187	-0.114845	-0.0495737	cg17581870	Body;Body;TSS1500;Body	C7orf50;C7orf50;MIR339;C7orf50		island	NA
57	chr7	1062212	1063357	10	3.43303e-24	0.00453187	-0.114845	-0.0495737	cg23771792	Body;Body;Body	C7orf50;C7orf50;C7orf50		shore	NA
57	chr7	1062212	1063357	10	3.43303e-24	0.00453187	-0.114845	-0.0495737	cg04894116	Body;Body;Body	C7orf50;C7orf50;C7orf50		shore	NA
57	chr7	1062212	1063357	10	3.43303e-24	0.00453187	-0.114845	-0.0495737	cg27205928	Body;Body;Body;Body	C7orf50;C7orf50;C7orf50;MIR339		island	NA
57	chr7	1062212	1063357	10	3.43303e-24	0.00453187	-0.114845	-0.0495737	cg04095257	Body;TSS200;Body;Body	C7orf50;MIR339;C7orf50;C7orf50		island	NA
57	chr7	1062212	1063357	10	3.43303e-24	0.00453187	-0.114845	-0.0495737	cg16492851	Body;TSS200;Body;Body	C7orf50;MIR339;C7orf50;C7orf50		island	NA
57	chr7	1062212	1063357	10	3.43303e-24	0.00453187	-0.114845	-0.0495737	cg04682977	Body;TSS200;Body;Body	C7orf50;MIR339;C7orf50;C7orf50		island	NA
57	chr7	1062212	1063357	10	3.43303e-24	0.00453187	-0.114845	-0.0495737	cg19730982	Body;TSS200;Body;Body	C7orf50;MIR339;C7orf50;C7orf50		island	NA
57	chr7	1062212	1063357	10	3.43303e-24	0.00453187	-0.114845	-0.0495737	cg00511027	Body;Body;TSS1500;Body	C7orf50;C7orf50;MIR339;C7orf50		island	NA
57	chr7	1062212	1063357	10	3.43303e-24	0.00453187	-0.114845	-0.0495737	cg09174653	Body;Body;TSS1500;Body	C7orf50;C7orf50;MIR339;C7orf50		shore	NA
58	chr1	230414293	230415902	8	3.66839e-20	0.00456742	-0.245367	-0.105183	cg12723251	Body	GALNT2	5hmC	shore	NA
58	chr1	230414293	230415902	8	3.66839e-20	0.00456742	-0.245367	-0.105183	cg00589617	3'UTR	GALNT2	5hmC	island	NA
58	chr1	230414293	230415902	8	3.66839e-20	0.00456742	-0.245367	-0.105183	cg19727396	Body	GALNT2	5hmC	shore	V$AHR_01
58	chr1	230414293	230415902	8	3.66839e-20	0.00456742	-0.245367	-0.105183	cg24591105	3'UTR	GALNT2	5hmC	shore	NA
58	chr1	230414293	230415902	8	3.66839e-20	0.00456742	-0.245367	-0.105183	cg05697274	3'UTR	GALNT2	5hmC	island	NA
58	chr1	230414293	230415902	8	3.66839e-20	0.00456742	-0.245367	-0.105183	cg17100751	Body	GALNT2		shore	NA
58	chr1	230414293	230415902	8	3.66839e-20	0.00456742	-0.245367	-0.105183	cg24250902	3'UTR	GALNT2		island	NA
58	chr1	230414293	230415902	8	3.66839e-20	0.00456742	-0.245367	-0.105183	cg03144619	3'UTR	GALNT2		island	NA
58	chr1	230414293	230415902	8	3.66839e-20	0.00456742	-0.245367	-0.105183	cg00526336	3'UTR	GALNT2		shore	NA
59	chr19	53540845	53541287	4	7.34108e-19	0.00463556	-0.119017	-0.0797823	cg17509563				island	NA
59	chr19	53540845	53541287	4	7.34108e-19	0.00463556	-0.119017	-0.0797823	cg07962338				island	NA
59	chr19	53540845	53541287	4	7.34108e-19	0.00463556	-0.119017	-0.0797823	cg02758612				island	NA
59	chr19	53540845	53541287	4	7.34108e-19	0.00463556	-0.119017	-0.0797823	cg05294813				shore	NA
60	chr11	859532	860157	5	3.21743e-17	0.00487737	-0.0678571	-0.0415762	cg24134897	5'UTR;Body;Body;Body;Body;Body;Body	TSPAN4;TSPAN4;TSPAN4;TSPAN4;TSPAN4;TSPAN4;TSPAN4		shore	NA
60	chr11	859532	860157	5	3.21743e-17	0.00487737	-0.0678571	-0.0415762	cg14277925	5'UTR;Body;Body;Body;Body;Body;Body	TSPAN4;TSPAN4;TSPAN4;TSPAN4;TSPAN4;TSPAN4;TSPAN4		shore	NA
60	chr11	859532	860157	5	3.21743e-17	0.00487737	-0.0678571	-0.0415762	cg18028767	5'UTR;Body;Body;Body;Body;Body;Body	TSPAN4;TSPAN4;TSPAN4;TSPAN4;TSPAN4;TSPAN4;TSPAN4		shore	NA
60	chr11	859532	860157	5	3.21743e-17	0.00487737	-0.0678571	-0.0415762	cg13071185	5'UTR;Body;Body;Body;Body;Body;Body	TSPAN4;TSPAN4;TSPAN4;TSPAN4;TSPAN4;TSPAN4;TSPAN4		shore	NA
60	chr11	859532	860157	5	3.21743e-17	0.00487737	-0.0678571	-0.0415762	cg23534766	5'UTR;Body;Body;Body;Body;Body;Body	TSPAN4;TSPAN4;TSPAN4;TSPAN4;TSPAN4;TSPAN4;TSPAN4		shore	NA
61	chr1	203829775	203830200	3	3.64637e-13	0.00489191	-0.0572409	-0.0473978	cg06642677	TSS1500	SNRPE		shore	NA
61	chr1	203829775	203830200	3	3.64637e-13	0.00489191	-0.0572409	-0.0473978	cg15481791	TSS1500	SNRPE		shore	NA
61	chr1	203829775	203830200	3	3.64637e-13	0.00489191	-0.0572409	-0.0473978	cg11405475	TSS1500	SNRPE		shore	NA
62	chr7	157466994	157467966	4	5.19511e-11	0.00489631	-0.206841	-0.145833	cg13538299	Body;Body;Body	PTPRN2;PTPRN2;PTPRN2		open sea	NA
62	chr7	157466994	157467966	4	5.19511e-11	0.00489631	-0.206841	-0.145833	cg07354008	Body;Body;Body	PTPRN2;PTPRN2;PTPRN2		open sea	NA
62	chr7	157466994	157467966	4	5.19511e-11	0.00489631	-0.206841	-0.145833	cg15972572	Body;Body;Body	PTPRN2;PTPRN2;PTPRN2		open sea	NA
62	chr7	157466994	157467966	4	5.19511e-11	0.00489631	-0.206841	-0.145833	cg19739098	Body;Body;Body	PTPRN2;PTPRN2;PTPRN2		open sea	NA
63	chr17	6329050	6329091	2	4.73979e-13	0.00493442	-0.222897	-0.195802	cg04902669	Body;Body;Body	AIPL1;AIPL1;AIPL1		open sea	V$ZID_01
63	chr17	6329050	6329091	2	4.73979e-13	0.00493442	-0.222897	-0.195802	cg08819023	Body;Body;Body	AIPL1;AIPL1;AIPL1		open sea	NA
64	chr10	134541379	134541472	2	1.03901e-15	0.00497871	-0.152356	-0.131193	cg04744514	Body	INPP5A	5hmC	shore	NA
64	chr10	134541379	134541472	2	1.03901e-15	0.00497871	-0.152356	-0.131193	cg20210689	Body	INPP5A	5hmC	shore	NA
65	chr7	150744274	150744599	3	5.44192e-13	0.00499255	-0.0706066	-0.0653284	cg01106572	TSS1500;TSS1500;3'UTR;TSS1500	ACCN3;ACCN3;ABCB8;ACCN3		shore	NA
65	chr7	150744274	150744599	3	5.44192e-13	0.00499255	-0.0706066	-0.0653284	cg07243147	TSS1500;TSS1500;3'UTR;TSS1500	ACCN3;ACCN3;ABCB8;ACCN3		shore	NA
65	chr7	150744274	150744599	3	5.44192e-13	0.00499255	-0.0706066	-0.0653284	cg12513221	TSS1500;TSS1500;3'UTR;TSS1500	ACCN3;ACCN3;ABCB8;ACCN3		shore	NA
66	chr11	488017	488555	3	4.6856e-13	0.00502522	-0.156343	-0.140358	cg21075020	Body	PTDSS2		shore	NA
66	chr11	488017	488555	3	4.6856e-13	0.00502522	-0.156343	-0.140358	cg02694576	Body	PTDSS2		shore	NA
66	chr11	488017	488555	3	4.6856e-13	0.00502522	-0.156343	-0.140358	cg05919523	Body	PTDSS2		shore	NA
67	chr7	978268	978305	3	1.88759e-12	0.00509002	-0.125411	-0.0840166	cg26209816	Body	ADAP1		shore	NA
67	chr7	978268	978305	3	1.88759e-12	0.00509002	-0.125411	-0.0840166	cg19436016	Body	ADAP1		shore	NA
67	chr7	978268	978305	3	1.88759e-12	0.00509002	-0.125411	-0.0840166	cg22940273	Body	ADAP1		shore	NA
68	chr1	1109486	1110107	3	3.3786e-14	0.00520464	-0.234853	-0.183769	cg03278726	5'UTR	TTLL10	BS	island	V$PAX4_04
68	chr1	1109486	1110107	3	3.3786e-14	0.00520464	-0.234853	-0.183769	cg10143960	5'UTR	TTLL10	BS	island	NA
68	chr1	1109486	1110107	3	3.3786e-14	0.00520464	-0.234853	-0.183769	cg18770446	5'UTR	TTLL10	BS	island	NA
68	chr1	1109486	1110107	3	3.3786e-14	0.00520464	-0.234853	-0.183769	cg22047469	5'UTR	TTLL10	BS	island	NA
69	chr5	179740743	179741120	4	4.03385e-10	0.00525458	-0.173321	-0.158132	cg23221052	Body	GFPT2		island	NA
69	chr5	179740743	179741120	4	4.03385e-10	0.00525458	-0.173321	-0.158132	cg13944838	Body	GFPT2		island	NA
69	chr5	179740743	179741120	4	4.03385e-10	0.00525458	-0.173321	-0.158132	cg23248424	Body	GFPT2		island	NA
69	chr5	179740743	179741120	4	4.03385e-10	0.00525458	-0.173321	-0.158132	cg02891314	Body	GFPT2		island	NA
70	chr11	62414700	62415024	3	1.15565e-12	0.00535831	-0.103465	-0.0212597	cg12954619	TSS1500;TSS1500;Body	GANAB;GANAB;INTS5	5hmC	shore	NA
70	chr11	62414700	62415024	3	1.15565e-12	0.00535831	-0.103465	-0.0212597	cg16260700	TSS1500;TSS1500;Body	GANAB;GANAB;INTS5	5hmC	shore	NA
70	chr11	62414700	62415024	3	1.15565e-12	0.00535831	-0.103465	-0.0212597	cg23508264	TSS1500;TSS1500;Body	GANAB;GANAB;INTS5	5hmC	shore	NA
71	chr4	618753	619865	10	2.63123e-22	0.00543832	-0.179452	-0.102076	cg12435792	1stExon;1stExon;5'UTR;5'UTR	PDE6B;PDE6B;PDE6B;PDE6B	5hmC	shore	NA
71	chr4	618753	619865	10	2.63123e-22	0.00543832	-0.179452	-0.102076	cg06444452	1stExon;1stExon	PDE6B;PDE6B	5hmC	island	NA
71	chr4	618753	619865	10	2.63123e-22	0.00543832	-0.179452	-0.102076	cg06648812	TSS200;TSS200	PDE6B;PDE6B	5hmC	shore	NA
71	chr4	618753	619865	10	2.63123e-22	0.00543832	-0.179452	-0.102076	cg03033111	TSS200;TSS200	PDE6B;PDE6B	5hmC	shore	NA
71	chr4	618753	619865	10	2.63123e-22	0.00543832	-0.179452	-0.102076	cg19463531	TSS200;TSS200	PDE6B;PDE6B	5hmC	shore	NA
71	chr4	618753	619865	10	2.63123e-22	0.00543832	-0.179452	-0.102076	cg04926732	TSS200;TSS200	PDE6B;PDE6B	5hmC	shore	NA
71	chr4	618753	619865	10	2.63123e-22	0.00543832	-0.179452	-0.102076	cg05078019	1stExon;1stExon;5'UTR;5'UTR	PDE6B;PDE6B;PDE6B;PDE6B	5hmC	shore	NA
71	chr4	618753	619865	10	2.63123e-22	0.00543832	-0.179452	-0.102076	cg09382601	1stExon;1stExon	PDE6B;PDE6B	5hmC	island	NA
71	chr4	618753	619865	10	2.63123e-22	0.00543832	-0.179452	-0.102076	cg02237540	1stExon;1stExon	PDE6B;PDE6B	5hmC	island	NA
71	chr4	618753	619865	10	2.63123e-22	0.00543832	-0.179452	-0.102076	cg02031260	TSS1500;TSS1500	PDE6B;PDE6B		shore	NA
72	chr7	1778765	1779084	2	9.09633e-13	0.00550395	-0.261176	-0.245382	cg07905119	5'UTR	ELFN1		open sea	NA
72	chr7	1778765	1779084	2	9.09633e-13	0.00550395	-0.261176	-0.245382	cg23699062	5'UTR	ELFN1		open sea	NA
72	chr7	1778765	1779084	2	9.09633e-13	0.00550395	-0.261176	-0.245382	cg02057013	5'UTR	ELFN1		open sea	NA
73	chr18	72837386	72837782	5	1.9402e-11	0.0055078	-0.249737	-0.160124	cg21412355				shore	V$SRF_01
73	chr18	72837386	72837782	5	1.9402e-11	0.0055078	-0.249737	-0.160124	cg21894287				island	NA
73	chr18	72837386	72837782	5	1.9402e-11	0.0055078	-0.249737	-0.160124	cg18709881				island	NA
73	chr18	72837386	72837782	5	1.9402e-11	0.0055078	-0.249737	-0.160124	cg14395744				island	NA
73	chr18	72837386	72837782	5	1.9402e-11	0.0055078	-0.249737	-0.160124	cg13460311				shore	NA
74	chr13	113537534	113538109	6	7.99669e-13	0.00552305	-0.140654	-0.0950866	cg20617344	3'UTR;3'UTR	ATP11A;ATP11A		shore	NA
74	chr13	113537534	113538109	6	7.99669e-13	0.00552305	-0.140654	-0.0950866	cg13394990	3'UTR;3'UTR	ATP11A;ATP11A		shore	NA
74	chr13	113537534	113538109	6	7.99669e-13	0.00552305	-0.140654	-0.0950866	cg11504718	3'UTR;3'UTR	ATP11A;ATP11A		shore	NA
74	chr13	113537534	113538109	6	7.99669e-13	0.00552305	-0.140654	-0.0950866	cg03450076	3'UTR;3'UTR	ATP11A;ATP11A		shore	NA
74	chr13	113537534	113538109	6	7.99669e-13	0.00552305	-0.140654	-0.0950866	cg19963178	3'UTR;3'UTR	ATP11A;ATP11A		shore	NA
74	chr13	113537534	113538109	6	7.99669e-13	0.00552305	-0.140654	-0.0950866	cg14555604	3'UTR;3'UTR	ATP11A;ATP11A		shore	NA
75	chr15	22946914	22947045	3	1.89637e-10	0.00556937	-0.16864	-0.139124	cg00213606	Body	CYFIP1		shore	NA
75	chr15	22946914	22947045	3	1.89637e-10	0.00556937	-0.16864	-0.139124	cg14984066	Body	CYFIP1		shore	NA
75	chr15	22946914	22947045	3	1.89637e-10	0.00556937	-0.16864	-0.139124	cg19648954	Body	CYFIP1		shore	NA
76	chr5	178266060	178266137	2	2.6826e-12	0.00564514	-0.283524	-0.270765	cg25547848				open sea	NA
76	chr5	178266060	178266137	2	2.6826e-12	0.00564514	-0.283524	-0.270765	cg11282828				open sea	NA
77	chr10	589143	589375	3	1.36375e-11	0.00574204	-0.0679356	-0.0536629	cg13874012	Body	DIP2C		open sea	NA
77	chr10	589143	589375	3	1.36375e-11	0.00574204	-0.0679356	-0.0536629	cg05544394	Body	DIP2C		open sea	NA
77	chr10	589143	589375	3	1.36375e-11	0.00574204	-0.0679356	-0.0536629	cg14957660	Body	DIP2C		open sea	NA
78	chr19	750024	751098	4	1.06312e-13	0.00584081	-0.13394	-0.115211	cg17376813	TSS1500	C19orf21		shelf	NA
78	chr19	750024	751098	4	1.06312e-13	0.00584081	-0.13394	-0.115211	cg26229361	TSS1500	C19orf21		shelf	NA
78	chr19	750024	751098	4	1.06312e-13	0.00584081	-0.13394	-0.115211	cg15225810	TSS1500	C19orf21		shelf	NA
78	chr19	750024	751098	4	1.06312e-13	0.00584081	-0.13394	-0.115211	cg03018001	TSS200	C19orf21		shelf	NA
79	chr13	23412250	23412622	4	3.02418e-13	0.00595632	-0.118512	-0.0808602	cg00748494				island	NA
79	chr13	23412250	23412622	4	3.02418e-13	0.00595632	-0.118512	-0.0808602	cg14395298				island	NA
79	chr13	23412250	23412622	4	3.02418e-13	0.00595632	-0.118512	-0.0808602	cg14089267				island	NA
79	chr13	23412250	23412622	4	3.02418e-13	0.00595632	-0.118512	-0.0808602	cg24702360				island	NA
80	chr6	29571074	29572219	11	3.07645e-16	0.00600535	-0.113216	-0.0684839	cg18656132	Body;Body;Body	GABBR1;GABBR1;GABBR1	5hmC	open sea	NA
80	chr6	29571074	29572219	11	3.07645e-16	0.00600535	-0.113216	-0.0684839	cg07169712	Body;Body;Body	GABBR1;GABBR1;GABBR1	5hmC	open sea	V$RREB1_01;V$TAXCREB_01
80	chr6	29571074	29572219	11	3.07645e-16	0.00600535	-0.113216	-0.0684839	cg12166917	Body;Body;Body	GABBR1;GABBR1;GABBR1	5hmC	open sea	V$TAXCREB_01
80	chr6	29571074	29572219	11	3.07645e-16	0.00600535	-0.113216	-0.0684839	cg00806253	Body;Body;Body	GABBR1;GABBR1;GABBR1	5hmC	open sea	V$TAXCREB_01
80	chr6	29571074	29572219	11	3.07645e-16	0.00600535	-0.113216	-0.0684839	cg12083232	Body;Body;Body	GABBR1;GABBR1;GABBR1	5hmC	open sea	NA
80	chr6	29571074	29572219	11	3.07645e-16	0.00600535	-0.113216	-0.0684839	cg15136600	Body;Body;Body	GABBR1;GABBR1;GABBR1	5hmC	open sea	NA
80	chr6	29571074	29572219	11	3.07645e-16	0.00600535	-0.113216	-0.0684839	cg21652192	Body;Body;Body	GABBR1;GABBR1;GABBR1	5hmC	open sea	NA
80	chr6	29571074	29572219	11	3.07645e-16	0.00600535	-0.113216	-0.0684839	cg20067272	Body;Body;Body	GABBR1;GABBR1;GABBR1	5hmC	open sea	NA
80	chr6	29571074	29572219	11	3.07645e-16	0.00600535	-0.113216	-0.0684839	cg05437995	Body;Body;Body	GABBR1;GABBR1;GABBR1	5hmC	open sea	NA
80	chr6	29571074	29572219	11	3.07645e-16	0.00600535	-0.113216	-0.0684839	cg27527874	3'UTR;3'UTR;3'UTR	GABBR1;GABBR1;GABBR1		open sea	NA
80	chr6	29571074	29572219	11	3.07645e-16	0.00600535	-0.113216	-0.0684839	cg03160788	Body;Body;Body	GABBR1;GABBR1;GABBR1		open sea	NA
81	chr7	157342543	157342801	3	7.9328e-25	0.00609809	-0.158069	-0.12841	cg20159095	Body;Body;Body	PTPRN2;PTPRN2;PTPRN2	5hmC	open sea	NA
81	chr7	157342543	157342801	3	7.9328e-25	0.00609809	-0.158069	-0.12841	cg09226185	Body;Body;Body	PTPRN2;PTPRN2;PTPRN2	5hmC	shelf	NA
81	chr7	157342543	157342801	3	7.9328e-25	0.00609809	-0.158069	-0.12841	cg04212285	Body;Body;Body	PTPRN2;PTPRN2;PTPRN2	5hmC	shelf	NA
82	chr19	17691465	17691691	3	2.24166e-10	0.00618623	-0.160059	-0.114769	cg19726935	Body	GLT25D1		island	NA
82	chr19	17691465	17691691	3	2.24166e-10	0.00618623	-0.160059	-0.114769	cg14800299	Body	GLT25D1		island	NA
82	chr19	17691465	17691691	3	2.24166e-10	0.00618623	-0.160059	-0.114769	cg10730370	Body	GLT25D1		island	NA
83	chr10	132632041	132632473	5	2.41707e-14	0.00620868	-0.220604	-0.139263	cg08483912			5hmC	open sea	NA
83	chr10	132632041	132632473	5	2.41707e-14	0.00620868	-0.220604	-0.139263	cg03912661			5hmC	open sea	NA
83	chr10	132632041	132632473	5	2.41707e-14	0.00620868	-0.220604	-0.139263	cg16430256			5hmC	open sea	NA
83	chr10	132632041	132632473	5	2.41707e-14	0.00620868	-0.220604	-0.139263	cg05351173			5hmC	open sea	NA
83	chr10	132632041	132632473	5	2.41707e-14	0.00620868	-0.220604	-0.139263	cg02948497			5hmC	open sea	NA
84	chr16	70680104	70680817	8	1.25587e-15	0.0062156	-0.0730209	-0.0424535	cg26831220	TSS200	IL34		open sea	NA
84	chr16	70680104	70680817	8	1.25587e-15	0.0062156	-0.0730209	-0.0424535	cg04917208	TSS1500	IL34		open sea	NA
84	chr16	70680104	70680817	8	1.25587e-15	0.0062156	-0.0730209	-0.0424535	cg01447350	TSS1500	IL34		open sea	NA
84	chr16	70680104	70680817	8	1.25587e-15	0.0062156	-0.0730209	-0.0424535	cg01782798	TSS200	IL34		open sea	NA
84	chr16	70680104	70680817	8	1.25587e-15	0.0062156	-0.0730209	-0.0424535	cg12347740	TSS200	IL34		open sea	NA
84	chr16	70680104	70680817	8	1.25587e-15	0.0062156	-0.0730209	-0.0424535	cg04164048	1stExon;5'UTR	IL34;IL34		open sea	NA
84	chr16	70680104	70680817	8	1.25587e-15	0.0062156	-0.0730209	-0.0424535	cg04012053	1stExon;5'UTR	IL34;IL34		open sea	NA
84	chr16	70680104	70680817	8	1.25587e-15	0.0062156	-0.0730209	-0.0424535	cg08402568	1stExon;5'UTR	IL34;IL34		open sea	NA
85	chr7	2082850	2083583	7	2.05035e-16	0.00641279	-0.257487	-0.139017	cg11792186	Body;Body;Body	MAD1L1;MAD1L1;MAD1L1	5hmC	open sea	NA
85	chr7	2082850	2083583	7	2.05035e-16	0.00641279	-0.257487	-0.139017	cg15914316	Body;Body;Body	MAD1L1;MAD1L1;MAD1L1	5hmC	open sea	NA
85	chr7	2082850	2083583	7	2.05035e-16	0.00641279	-0.257487	-0.139017	cg24577389	Body;Body;Body	MAD1L1;MAD1L1;MAD1L1	5hmC	open sea	NA
85	chr7	2082850	2083583	7	2.05035e-16	0.00641279	-0.257487	-0.139017	cg14010305	Body;Body;Body	MAD1L1;MAD1L1;MAD1L1	5hmC	open sea	NA
85	chr7	2082850	2083583	7	2.05035e-16	0.00641279	-0.257487	-0.139017	cg18483265	Body;Body;Body	MAD1L1;MAD1L1;MAD1L1	5hmC	open sea	NA
85	chr7	2082850	2083583	7	2.05035e-16	0.00641279	-0.257487	-0.139017	cg02304222	Body;Body;Body	MAD1L1;MAD1L1;MAD1L1		open sea	NA
85	chr7	2082850	2083583	7	2.05035e-16	0.00641279	-0.257487	-0.139017	cg25352924	Body;Body;Body	MAD1L1;MAD1L1;MAD1L1		open sea	NA
86	chr19	48908102	48908557	5	3.02947e-14	0.00667737	-0.110736	-0.0878118	cg02807849	Body	GRIN2D		shore	NA
86	chr19	48908102	48908557	5	3.02947e-14	0.00667737	-0.110736	-0.0878118	cg17969540	Body	GRIN2D		island	NA
86	chr19	48908102	48908557	5	3.02947e-14	0.00667737	-0.110736	-0.0878118	cg06932616	Body	GRIN2D		island	NA
86	chr19	48908102	48908557	5	3.02947e-14	0.00667737	-0.110736	-0.0878118	cg17377463	Body	GRIN2D		island	NA
87	chr6	28945182	28945507	8	4.73146e-21	0.00669674	-0.0394144	-0.0219351	cg01516851				open sea	NA
87	chr6	28945182	28945507	8	4.73146e-21	0.00669674	-0.0394144	-0.0219351	cg02846841				open sea	NA
87	chr6	28945182	28945507	8	4.73146e-21	0.00669674	-0.0394144	-0.0219351	cg12707135				open sea	NA
87	chr6	28945182	28945507	8	4.73146e-21	0.00669674	-0.0394144	-0.0219351	cg22685807				open sea	NA
87	chr6	28945182	28945507	8	4.73146e-21	0.00669674	-0.0394144	-0.0219351	cg10919664				open sea	NA
87	chr6	28945182	28945507	8	4.73146e-21	0.00669674	-0.0394144	-0.0219351	cg08873424				open sea	NA
87	chr6	28945182	28945507	8	4.73146e-21	0.00669674	-0.0394144	-0.0219351	cg24126967				open sea	NA
87	chr6	28945182	28945507	8	4.73146e-21	0.00669674	-0.0394144	-0.0219351	cg10739715				open sea	NA
88	chr16	87730071	87730651	6	1.02675e-10	0.00672062	-0.163357	-0.0624697	cg26446350	Body	JPH3		open sea	NA
88	chr16	87730071	87730651	6	1.02675e-10	0.00672062	-0.163357	-0.0624697	cg05008386	Body	JPH3		open sea	NA
88	chr16	87730071	87730651	6	1.02675e-10	0.00672062	-0.163357	-0.0624697	cg27605414	Body	JPH3		open sea	NA
88	chr16	87730071	87730651	6	1.02675e-10	0.00672062	-0.163357	-0.0624697	cg16557526	3'UTR	JPH3		open sea	NA
88	chr16	87730071	87730651	6	1.02675e-10	0.00672062	-0.163357	-0.0624697	cg08922090	3'UTR	JPH3		open sea	NA
88	chr16	87730071	87730651	6	1.02675e-10	0.00672062	-0.163357	-0.0624697	cg09391949	3'UTR	JPH3		open sea	NA
89	chr1	6035549	6036414	3	5.38288e-14	0.00684391	-0.134286	-0.0937564	cg26003933	Body	NPHP4		open sea	NA
89	chr1	6035549	6036414	3	5.38288e-14	0.00684391	-0.134286	-0.0937564	cg09275986	Body	NPHP4		open sea	NA
89	chr1	6035549	6036414	3	5.38288e-14	0.00684391	-0.134286	-0.0937564	cg15550953	Body	NPHP4		open sea	NA
90	chr6	168551339	168551491	3	2.58166e-10	0.00693587	-0.13495	-0.0940001	cg04305440				open sea	NA
90	chr6	168551339	168551491	3	2.58166e-10	0.00693587	-0.13495	-0.0940001	cg25764935				open sea	NA
90	chr6	168551339	168551491	3	2.58166e-10	0.00693587	-0.13495	-0.0940001	cg18920489				open sea	NA
91	chr19	16045054	16045119	2	3.65449e-15	0.00747115	0.15282	0.11681	cg18449879	1stExon;Body	CYP4F11;CYP4F11		open sea	NA
91	chr19	16045054	16045119	2	3.65449e-15	0.00747115	0.15282	0.11681	cg24655310	1stExon;Body	CYP4F11;CYP4F11		open sea	NA
92	chr12	132329040	132329481	4	9.98373e-13	0.00762744	-0.126845	-0.095829	cg09444206	Body	MMP17		shore	NA
92	chr12	132329040	132329481	4	9.98373e-13	0.00762744	-0.126845	-0.095829	cg25772039	Body	MMP17		island	NA
92	chr12	132329040	132329481	4	9.98373e-13	0.00762744	-0.126845	-0.095829	cg20519577	Body	MMP17		island	NA
92	chr12	132329040	132329481	4	9.98373e-13	0.00762744	-0.126845	-0.095829	cg24569427	Body	MMP17		island	NA
93	chr11	61522178	61523045	8	3.27103e-15	0.00764935	0.150454	0.0918222	cg11179625	TSS200;Body;Body	C11orf9;C11orf9;DKFZP434K028		shelf	NA
93	chr11	61522178	61523045	8	3.27103e-15	0.00764935	0.150454	0.0918222	cg05373256	Body;Body;TSS1500	C11orf9;DKFZP434K028;C11orf9		shelf	NA
93	chr11	61522178	61523045	8	3.27103e-15	0.00764935	0.150454	0.0918222	cg22627427	Body;Body;TSS1500	C11orf9;DKFZP434K028;C11orf9		shelf	NA
93	chr11	61522178	61523045	8	3.27103e-15	0.00764935	0.150454	0.0918222	cg05881566	TSS200;Body;Body	C11orf9;C11orf9;DKFZP434K028		shelf	NA
93	chr11	61522178	61523045	8	3.27103e-15	0.00764935	0.150454	0.0918222	cg11060910	TSS200;Body;Body	C11orf9;C11orf9;DKFZP434K028		shelf	NA
93	chr11	61522178	61523045	8	3.27103e-15	0.00764935	0.150454	0.0918222	cg07486017	TSS200;Body;Body	C11orf9;C11orf9;DKFZP434K028		shelf	V$HEN1_02;V$PAX4_01
93	chr11	61522178	61523045	8	3.27103e-15	0.00764935	0.150454	0.0918222	cg06137032	TSS200;Body;Body	C11orf9;C11orf9;DKFZP434K028		shelf	V$HEN1_02;V$PAX4_01
93	chr11	61522178	61523045	8	3.27103e-15	0.00764935	0.150454	0.0918222	cg01178188	Body;Body;Body	C11orf9;C11orf9;DKFZP434K028		shelf	NA
94	chr7	155582776	155582853	2	2.57063e-14	0.00770594	-0.0911501	-0.0816297	cg05501419				shelf	NA
94	chr7	155582776	155582853	2	2.57063e-14	0.00770594	-0.0911501	-0.0816297	cg09176727				shelf	NA
95	chr11	64507260	64507835	2	6.11805e-11	0.0079374	-0.130656	-0.128725	cg10701232	Body;Body;Body	RASGRP2;RASGRP2;RASGRP2		shelf	V$BACH1_01;V$AP1_01;V$BACH2_01
95	chr11	64507260	64507835	2	6.11805e-11	0.0079374	-0.130656	-0.128725	cg08357230	Body;Body;Body	RASGRP2;RASGRP2;RASGRP2		shore	NA
96	chr2	241807747	241807924	3	3.53042e-10	0.00812981	-0.146544	-0.119931	cg24371033	TSS1500	AGXT		open sea	NA
96	chr2	241807747	241807924	3	3.53042e-10	0.00812981	-0.146544	-0.119931	cg17461448	TSS1500	AGXT		open sea	NA
96	chr2	241807747	241807924	3	3.53042e-10	0.00812981	-0.146544	-0.119931	cg16967583	TSS1500	AGXT		open sea	NA
97	chr13	111277423	111277611	3	1.96277e-11	0.00813743	-0.134121	-0.126393	cg21664614	Body	CARKD		island	V$AP4_01
97	chr13	111277423	111277611	3	1.96277e-11	0.00813743	-0.134121	-0.126393	cg06258529	Body	CARKD		island	NA
97	chr13	111277423	111277611	3	1.96277e-11	0.00813743	-0.134121	-0.126393	cg16682206	Body	CARKD		island	NA
98	chr9	132402804	132403257	2	1.27817e-11	0.00825683	-0.0838296	-0.063717	cg14057241	Body;Body	ASB6;ASB6		shore	NA
98	chr9	132402804	132403257	2	1.27817e-11	0.00825683	-0.0838296	-0.063717	cg00632853	Body;Body	ASB6;ASB6		shore	NA
99	chr1	1490676	1490906	3	2.82688e-12	0.00833569	-0.155682	-0.110317	cg16277776	Body	SSU72		shore	NA
99	chr1	1490676	1490906	3	2.82688e-12	0.00833569	-0.155682	-0.110317	cg07211239	Body	SSU72		shore	NA
99	chr1	1490676	1490906	3	2.82688e-12	0.00833569	-0.155682	-0.110317	cg10987926	Body	SSU72		shore	NA
100	chr22	40814878	40815101	3	5.84636e-15	0.00834197	-0.140827	-0.0859528	cg06803995	Body	MKL1		island	V$COMP1_01
100	chr22	40814878	40815101	3	5.84636e-15	0.00834197	-0.140827	-0.0859528	cg08362785	Body	MKL1		island	NA
100	chr22	40814878	40815101	3	5.84636e-15	0.00834197	-0.140827	-0.0859528	cg17237086	Body	MKL1		island	NA
101	chr6	29626990	29627395	8	2.72921e-11	0.00841648	0.193095	0.0977977	cg23174322	Body;Body;Body;Body;Body;Body;Body;Body;Body;Body;Body	MOG;MOG;MOG;MOG;MOG;MOG;MOG;MOG;MOG;MOG;MOG		open sea	NA
101	chr6	29626990	29627395	8	2.72921e-11	0.00841648	0.193095	0.0977977	cg06297863	Body;Body;Body;Body;Body;Body;Body;Body;Body;Body;Body	MOG;MOG;MOG;MOG;MOG;MOG;MOG;MOG;MOG;MOG;MOG		open sea	NA
101	chr6	29626990	29627395	8	2.72921e-11	0.00841648	0.193095	0.0977977	cg25654517	Body;Body;Body;Body;Body;Body;Body;Body;Body;Body;Body	MOG;MOG;MOG;MOG;MOG;MOG;MOG;MOG;MOG;MOG;MOG		open sea	NA
101	chr6	29626990	29627395	8	2.72921e-11	0.00841648	0.193095	0.0977977	cg13682912	Body;Body;Body;Body;Body;Body;Body;Body;Body;Body;Body	MOG;MOG;MOG;MOG;MOG;MOG;MOG;MOG;MOG;MOG;MOG		open sea	NA
101	chr6	29626990	29627395	8	2.72921e-11	0.00841648	0.193095	0.0977977	cg02589899	Body;Body;Body;Body;Body;Body;Body;Body;Body;Body;Body	MOG;MOG;MOG;MOG;MOG;MOG;MOG;MOG;MOG;MOG;MOG		open sea	V$TAXCREB_02
101	chr6	29626990	29627395	8	2.72921e-11	0.00841648	0.193095	0.0977977	cg14656245	Body;Body;Body;Body;Body;Body;Body;Body;Body;Body;Body	MOG;MOG;MOG;MOG;MOG;MOG;MOG;MOG;MOG;MOG;MOG		open sea	NA
101	chr6	29626990	29627395	8	2.72921e-11	0.00841648	0.193095	0.0977977	cg25017994	Body;Body;Body;Body;Body;Body;Body;Body;Body;Body;Body	MOG;MOG;MOG;MOG;MOG;MOG;MOG;MOG;MOG;MOG;MOG		open sea	NA
101	chr6	29626990	29627395	8	2.72921e-11	0.00841648	0.193095	0.0977977	cg02450267	Body;Body;Body;Body;Body;Body;Body;Body;Body;Body;Body	MOG;MOG;MOG;MOG;MOG;MOG;MOG;MOG;MOG;MOG;MOG		open sea	NA
102	chr12	57587422	57587773	4	2.2526e-12	0.00864476	-0.0913608	-0.0827552	cg24219985	TSS1500;Body	MIR1228;LRP1		open sea	NA
102	chr12	57587422	57587773	4	2.2526e-12	0.00864476	-0.0913608	-0.0827552	cg10989175	TSS1500;Body	MIR1228;LRP1		open sea	V$TST1_01
102	chr12	57587422	57587773	4	2.2526e-12	0.00864476	-0.0913608	-0.0827552	cg16521032	TSS1500;Body	MIR1228;LRP1		open sea	NA
102	chr12	57587422	57587773	4	2.2526e-12	0.00864476	-0.0913608	-0.0827552	cg05776138	TSS1500;Body	MIR1228;LRP1		open sea	NA
103	chr8	703870	704148	3	4.61536e-10	0.00875137	-0.127954	-0.111558	cg15984406				open sea	NA
103	chr8	703870	704148	3	4.61536e-10	0.00875137	-0.127954	-0.111558	cg05140937				open sea	NA
103	chr8	703870	704148	3	4.61536e-10	0.00875137	-0.127954	-0.111558	cg17966488				open sea	NA
104	chr7	41732833	41733448	4	2.26543e-12	0.00883884	-0.124343	-0.0778806	cg07650391	TSS200;TSS200;Body	LOC285954;LOC285954;INHBA		open sea	NA
104	chr7	41732833	41733448	4	2.26543e-12	0.00883884	-0.124343	-0.0778806	cg18676273	Body;TSS1500;TSS1500	INHBA;LOC285954;LOC285954		open sea	NA
104	chr7	41732833	41733448	4	2.26543e-12	0.00883884	-0.124343	-0.0778806	cg05877565	Body;TSS1500;TSS1500	INHBA;LOC285954;LOC285954		open sea	NA
104	chr7	41732833	41733448	4	2.26543e-12	0.00883884	-0.124343	-0.0778806	cg00285343	TSS200;TSS200;Body	LOC285954;LOC285954;INHBA		open sea	NA
105	chr16	89037013	89037481	2	5.2606e-11	0.00884189	-0.221679	-0.165471	cg00574917	Body	CBFA2T3		shelf	NA
105	chr16	89037013	89037481	2	5.2606e-11	0.00884189	-0.221679	-0.165471	cg06204040	Body	CBFA2T3		shelf	NA
106	chr16	368524	368761	3	1.71974e-10	0.00904306	-0.234319	-0.21254	cg01929285	Body;Body	AXIN1;AXIN1		open sea	NA
106	chr16	368524	368761	3	1.71974e-10	0.00904306	-0.234319	-0.21254	cg26525629	Body;Body	AXIN1;AXIN1		open sea	NA
106	chr16	368524	368761	3	1.71974e-10	0.00904306	-0.234319	-0.21254	cg00602726	Body;Body	AXIN1;AXIN1		open sea	NA
107	chr12	104443742	104444418	10	7.09143e-14	0.00914179	0.0875754	0.0523884	cg27156359	5'UTR;1stExon	GLT8D2;GLT8D2		open sea	NA
107	chr12	104443742	104444418	10	7.09143e-14	0.00914179	0.0875754	0.0523884	cg07328579	5'UTR;1stExon	GLT8D2;GLT8D2		open sea	NA
107	chr12	104443742	104444418	10	7.09143e-14	0.00914179	0.0875754	0.0523884	cg08101375	TSS200	GLT8D2		open sea	NA
107	chr12	104443742	104444418	10	7.09143e-14	0.00914179	0.0875754	0.0523884	cg00987461	TSS200	GLT8D2		open sea	NA
107	chr12	104443742	104444418	10	7.09143e-14	0.00914179	0.0875754	0.0523884	cg16721177	TSS200	GLT8D2		open sea	NA
107	chr12	104443742	104444418	10	7.09143e-14	0.00914179	0.0875754	0.0523884	cg14849798	TSS200	GLT8D2		open sea	NA
107	chr12	104443742	104444418	10	7.09143e-14	0.00914179	0.0875754	0.0523884	cg21988041	TSS200	GLT8D2		open sea	NA
107	chr12	104443742	104444418	10	7.09143e-14	0.00914179	0.0875754	0.0523884	cg18924222	TSS1500	GLT8D2		open sea	NA
107	chr12	104443742	104444418	10	7.09143e-14	0.00914179	0.0875754	0.0523884	cg09809567	TSS1500	GLT8D2		open sea	NA
107	chr12	104443742	104444418	10	7.09143e-14	0.00914179	0.0875754	0.0523884	cg04922803	TSS1500	GLT8D2		open sea	NA
108	chr20	61668419	61668469	2	5.80672e-17	0.00938559	-0.210965	-0.166538	cg24143873	TSS200	NCRNA00029		shore	NA
108	chr20	61668419	61668469	2	5.80672e-17	0.00938559	-0.210965	-0.166538	cg04402891	TSS200	NCRNA00029		shore	NA
109	chr19	1371189	1371281	2	3.86883e-10	0.00940354	-0.197795	-0.191518	cg25566714	Body;Body	MUM1;MUM1		island	NA
109	chr19	1371189	1371281	2	3.86883e-10	0.00940354	-0.197795	-0.191518	cg14062238	Body;Body	MUM1;MUM1		island	NA
110	chr22	50893625	50894039	2	5.54429e-11	0.0096074	-0.0935751	-0.0837096	cg04175049	Body	SBF1		shore	NA
110	chr22	50893625	50894039	2	5.54429e-11	0.0096074	-0.0935751	-0.0837096	cg21289422	Body	SBF1		shore	NA
111	chr19	1880126	1880136	2	1.09169e-12	0.00973132	-0.136321	-0.101637	cg03939371	Body;Body	FAM108A1;FAM108A1		island	NA
111	chr19	1880126	1880136	2	1.09169e-12	0.00973132	-0.136321	-0.101637	cg14654587	Body;Body	FAM108A1;FAM108A1		island	NA
112	chr19	5141399	5142198	3	1.45627e-16	0.009837	-0.10549	-0.0733803	cg14580919	Body	KDM4B		island	NA
112	chr19	5141399	5142198	3	1.45627e-16	0.009837	-0.10549	-0.0733803	cg19764940	Body	KDM4B		island	NA
112	chr19	5141399	5142198	3	1.45627e-16	0.009837	-0.10549	-0.0733803	cg25949093	Body	KDM4B		island	NA
113	chr3	42705828	42706106	4	2.27068e-14	0.00996997	-0.149168	-0.0644922	cg23202468	Body	ZBTB47		open sea	NA
113	chr3	42705828	42706106	4	2.27068e-14	0.00996997	-0.149168	-0.0644922	cg03540622	Body	ZBTB47		open sea	NA
113	chr3	42705828	42706106	4	2.27068e-14	0.00996997	-0.149168	-0.0644922	cg06181470	Body	ZBTB47		open sea	NA
113	chr3	42705828	42706106	4	2.27068e-14	0.00996997	-0.149168	-0.0644922	cg13613891	3'UTR	ZBTB47		open sea	NA
114	chr16	29153300	29153407	3	5.46396e-10	0.0100858	-0.187701	-0.115001	cg04749453				island	NA
114	chr16	29153300	29153407	3	5.46396e-10	0.0100858	-0.187701	-0.115001	cg06871736				island	NA
114	chr16	29153300	29153407	3	5.46396e-10	0.0100858	-0.187701	-0.115001	cg09039112				island	NA
115	chr19	15512044	15512550	3	9.20104e-13	0.0102862	-0.191404	-0.134226	cg10754777	Body	AKAP8L	5hmC	island	NA
115	chr19	15512044	15512550	3	9.20104e-13	0.0102862	-0.191404	-0.134226	cg27393769	Body	AKAP8L	5hmC	island	NA
115	chr19	15512044	15512550	3	9.20104e-13	0.0102862	-0.191404	-0.134226	cg00022594	Body	AKAP8L	5hmC	shore	NA
116	chr18	29264051	29264431	3	1.04579e-11	0.0103529	-0.0285137	-0.0199408	cg21674153	Body	B4GALT6		shore	NA
116	chr18	29264051	29264431	3	1.04579e-11	0.0103529	-0.0285137	-0.0199408	cg01090609	Body	B4GALT6		shore	NA
116	chr18	29264051	29264431	3	1.04579e-11	0.0103529	-0.0285137	-0.0199408	cg16304527	1stExon;5'UTR	B4GALT6;B4GALT6		shore	NA
117	chr4	141564017	141564127	2	5.67145e-10	0.0104151	-0.160435	-0.141842	cg23631385	Body	TBC1D9	5hmC	open sea	NA
117	chr4	141564017	141564127	2	5.67145e-10	0.0104151	-0.160435	-0.141842	cg03135535	Body	TBC1D9	5hmC	open sea	NA
118	chr7	157462004	157464230	8	1.10375e-16	0.0107795	-0.173669	-0.0886915	cg24688143	Body;Body;Body	PTPRN2;PTPRN2;PTPRN2		open sea	NA
118	chr7	157462004	157464230	8	1.10375e-16	0.0107795	-0.173669	-0.0886915	cg11309704	Body;Body;Body	PTPRN2;PTPRN2;PTPRN2		open sea	V$USF_Q6
118	chr7	157462004	157464230	8	1.10375e-16	0.0107795	-0.173669	-0.0886915	cg02956699	Body;Body;Body	PTPRN2;PTPRN2;PTPRN2		open sea	NA
118	chr7	157462004	157464230	8	1.10375e-16	0.0107795	-0.173669	-0.0886915	cg24794322	Body;Body;Body	PTPRN2;PTPRN2;PTPRN2		open sea	NA
118	chr7	157462004	157464230	8	1.10375e-16	0.0107795	-0.173669	-0.0886915	cg02855778	Body;Body;Body	PTPRN2;PTPRN2;PTPRN2		open sea	NA
118	chr7	157462004	157464230	8	1.10375e-16	0.0107795	-0.173669	-0.0886915	cg26706676	Body;Body;Body	PTPRN2;PTPRN2;PTPRN2		open sea	NA
118	chr7	157462004	157464230	8	1.10375e-16	0.0107795	-0.173669	-0.0886915	cg06819373	Body;Body;Body	PTPRN2;PTPRN2;PTPRN2		open sea	NA
118	chr7	157462004	157464230	8	1.10375e-16	0.0107795	-0.173669	-0.0886915	cg09598596	Body;Body;Body	PTPRN2;PTPRN2;PTPRN2		open sea	NA
118	chr7	157462004	157464230	8	1.10375e-16	0.0107795	-0.173669	-0.0886915	cg09833475	Body;Body;Body	PTPRN2;PTPRN2;PTPRN2		open sea	NA
118	chr7	157462004	157464230	8	1.10375e-16	0.0107795	-0.173669	-0.0886915	cg26510723	Body;Body;Body	PTPRN2;PTPRN2;PTPRN2		open sea	NA
119	chr7	98985712	98985799	3	5.52402e-10	0.0108615	-0.132508	-0.0934809	cg11963202	Body	ARPC1B		open sea	NA
119	chr7	98985712	98985799	3	5.52402e-10	0.0108615	-0.132508	-0.0934809	cg21842944	Body	ARPC1B		open sea	NA
119	chr7	98985712	98985799	3	5.52402e-10	0.0108615	-0.132508	-0.0934809	cg18470468	Body	ARPC1B		open sea	NA
120	chr7	2760692	2760784	2	2.83976e-16	0.0108769	-0.206722	-0.162524	cg23627948				shelf	NA
120	chr7	2760692	2760784	2	2.83976e-16	0.0108769	-0.206722	-0.162524	cg23779604				shelf	NA
121	chr16	723016	723047	2	6.97355e-10	0.0108832	-0.260099	-0.202211	cg09355190	Body	RHOT2	5hmC	shore	NA
121	chr16	723016	723047	2	6.97355e-10	0.0108832	-0.260099	-0.202211	cg03246570	Body	RHOT2	5hmC	shore	NA
122	chr3	126328226	126328594	3	9.79339e-15	0.0109286	-0.153504	-0.0953241	cg02205072	TSS1500	TXNRD3IT1		open sea	NA
122	chr3	126328226	126328594	3	9.79339e-15	0.0109286	-0.153504	-0.0953241	cg27616378	TSS1500	TXNRD3IT1		open sea	NA
122	chr3	126328226	126328594	3	9.79339e-15	0.0109286	-0.153504	-0.0953241	cg25948075	TSS1500	TXNRD3IT1		open sea	NA
123	chr12	129417179	129417379	3	3.48117e-10	0.0110185	-0.185616	-0.142645	cg02612335	Body	GLT1D1		open sea	NA
123	chr12	129417179	129417379	3	3.48117e-10	0.0110185	-0.185616	-0.142645	cg16287252	Body	GLT1D1		open sea	NA
123	chr12	129417179	129417379	3	3.48117e-10	0.0110185	-0.185616	-0.142645	cg21486646	Body	GLT1D1		open sea	NA
124	chr17	4486136	4487399	7	4.68857e-15	0.0111201	-0.147182	-0.0800773	cg26317834	TSS1500	SMTNL2		shore	NA
124	chr17	4486136	4487399	7	4.68857e-15	0.0111201	-0.147182	-0.0800773	cg01720228	TSS1500;TSS1500	SMTNL2;SMTNL2		shore	NA
124	chr17	4486136	4487399	7	4.68857e-15	0.0111201	-0.147182	-0.0800773	cg24135491	TSS200;TSS1500	SMTNL2;SMTNL2		shore	NA
124	chr17	4486136	4487399	7	4.68857e-15	0.0111201	-0.147182	-0.0800773	cg25585129	TSS1500;TSS1500	SMTNL2;SMTNL2		shore	NA
124	chr17	4486136	4487399	7	4.68857e-15	0.0111201	-0.147182	-0.0800773	cg18102738	TSS200;TSS1500	SMTNL2;SMTNL2		shore	NA
124	chr17	4486136	4487399	7	4.68857e-15	0.0111201	-0.147182	-0.0800773	cg13375589	TSS200;TSS1500	SMTNL2;SMTNL2		shore	NA
124	chr17	4486136	4487399	7	4.68857e-15	0.0111201	-0.147182	-0.0800773	cg24917104	TSS1500;5'UTR	SMTNL2;SMTNL2		island	NA
125	chr16	1204876	1205342	2	3.57697e-17	0.0111899	-0.17608	-0.137375	cg10399269	Body;Body	CACNA1H;CACNA1H		shore	NA
125	chr16	1204876	1205342	2	3.57697e-17	0.0111899	-0.17608	-0.137375	cg01895442	Body;Body	CACNA1H;CACNA1H		shore	NA
125	chr16	1204876	1205342	2	3.57697e-17	0.0111899	-0.17608	-0.137375	cg09238049	Body;Body	CACNA1H;CACNA1H		shore	NA
126	chr7	98869768	98869778	2	9.17943e-11	0.0113426	-0.122401	-0.103227	cg15807655	TSS1500	MYH16		open sea	NA
126	chr7	98869768	98869778	2	9.17943e-11	0.0113426	-0.122401	-0.103227	cg17654107	TSS1500	MYH16		open sea	NA
127	chr8	848352	848452	2	4.0304e-10	0.0113947	-0.1509	-0.122578	cg03063943				shore	NA
127	chr8	848352	848452	2	4.0304e-10	0.0113947	-0.1509	-0.122578	cg05616965				shore	NA
128	chr1	21112950	21113554	5	4.27811e-13	0.0116187	-0.0206135	-0.0088603	cg20613337	TSS200	HP1BP3		island	NA
128	chr1	21112950	21113554	5	4.27811e-13	0.0116187	-0.0206135	-0.0088603	cg00577361	5'UTR	HP1BP3		island	NA
128	chr1	21112950	21113554	5	4.27811e-13	0.0116187	-0.0206135	-0.0088603	cg21695487	5'UTR	HP1BP3		island	NA
128	chr1	21112950	21113554	5	4.27811e-13	0.0116187	-0.0206135	-0.0088603	cg18436758	TSS200	HP1BP3		island	NA
128	chr1	21112950	21113554	5	4.27811e-13	0.0116187	-0.0206135	-0.0088603	cg23097509	TSS1500	HP1BP3		island	NA
129	chr11	2555203	2555576	4	1.59968e-12	0.0116453	-0.136458	-0.0100263	cg02258534	Body;Body	KCNQ1;KCNQ1		island	NA
129	chr11	2555203	2555576	4	1.59968e-12	0.0116453	-0.136458	-0.0100263	cg18729298	Body;Body	KCNQ1;KCNQ1		shore	NA
129	chr11	2555203	2555576	4	1.59968e-12	0.0116453	-0.136458	-0.0100263	cg07824422	Body;Body	KCNQ1;KCNQ1		island	NA
129	chr11	2555203	2555576	4	1.59968e-12	0.0116453	-0.136458	-0.0100263	cg05898618	Body;Body	KCNQ1;KCNQ1		island	NA
130	chr17	79042364	79042967	2	7.6235e-12	0.0118708	-0.180135	-0.131568	cg11543393	Body;Body;Body;Body	BAIAP2;BAIAP2;BAIAP2;BAIAP2		shelf	NA
130	chr17	79042364	79042967	2	7.6235e-12	0.0118708	-0.180135	-0.131568	cg00146249	Body;Body;Body;Body	BAIAP2;BAIAP2;BAIAP2;BAIAP2		shelf	NA
131	chr16	1815103	1815198	3	1.23694e-10	0.0119462	-0.0887436	-0.0707306	cg08082791	Body;Body	MAPK8IP3;MAPK8IP3		shore	NA
131	chr16	1815103	1815198	3	1.23694e-10	0.0119462	-0.0887436	-0.0707306	cg08287288	Body;Body	MAPK8IP3;MAPK8IP3		shore	V$COMP1_01;V$CDPCR3HD_01
131	chr16	1815103	1815198	3	1.23694e-10	0.0119462	-0.0887436	-0.0707306	cg06646646	Body;Body	MAPK8IP3;MAPK8IP3		shore	V$PPARG_03
132	chr16	2146389	2146423	2	2.1734e-11	0.0120222	-0.17772	-0.144172	cg04668677	Body;Body	PKD1;PKD1		shelf	NA
132	chr16	2146389	2146423	2	2.1734e-11	0.0120222	-0.17772	-0.144172	cg08237309	Body;Body	PKD1;PKD1		shelf	NA
133	chr17	80879439	80879483	2	4.32275e-10	0.012028	-0.113398	-0.0981579	cg22043788	Body	TBCD		open sea	NA
133	chr17	80879439	80879483	2	4.32275e-10	0.012028	-0.113398	-0.0981579	cg08759238	Body	TBCD		open sea	NA
134	chr16	88164558	88164581	2	1.24793e-10	0.0121604	-0.15978	-0.140134	cg00737916				shore	NA
134	chr16	88164558	88164581	2	1.24793e-10	0.0121604	-0.15978	-0.140134	cg03926906				shore	NA
135	chr19	1467921	1467979	3	7.99254e-12	0.0125306	0.0947675	0.0827754	cg10808783	Body	APC2	BS	island	NA
135	chr19	1467921	1467979	3	7.99254e-12	0.0125306	0.0947675	0.0827754	cg10094078	Body	APC2	BS	island	NA
135	chr19	1467921	1467979	3	7.99254e-12	0.0125306	0.0947675	0.0827754	cg03306486	Body	APC2	BS	island	NA
135	chr19	1467921	1467979	3	7.99254e-12	0.0125306	0.0947675	0.0827754	cg19333963	Body	APC2	BS	island	NA
136	chr10	372589	373069	3	9.42165e-22	0.0126185	-0.210636	-0.137916	cg24386905	Body	DIP2C	5hmC	shore	NA
136	chr10	372589	373069	3	9.42165e-22	0.0126185	-0.210636	-0.137916	cg22831256	Body	DIP2C	5hmC	island	NA
136	chr10	372589	373069	3	9.42165e-22	0.0126185	-0.210636	-0.137916	cg22866998	Body	DIP2C		shore	NA
137	chr3	57113245	57113767	5	2.82493e-15	0.0127823	0.0407675	-0.00518833	cg11741902	5'UTR	ARHGEF3		island	NA
137	chr3	57113245	57113767	5	2.82493e-15	0.0127823	0.0407675	-0.00518833	cg16978797	TSS200	ARHGEF3		island	NA
137	chr3	57113245	57113767	5	2.82493e-15	0.0127823	0.0407675	-0.00518833	cg26259546	TSS200	ARHGEF3		island	NA
137	chr3	57113245	57113767	5	2.82493e-15	0.0127823	0.0407675	-0.00518833	cg11430718	TSS1500	ARHGEF3		island	NA
137	chr3	57113245	57113767	5	2.82493e-15	0.0127823	0.0407675	-0.00518833	cg10147507	TSS1500	ARHGEF3		island	NA
138	chr17	75524062	75524155	3	4.54842e-10	0.012839	-0.0321744	-0.0304438	cg12659114				shore	NA
138	chr17	75524062	75524155	3	4.54842e-10	0.012839	-0.0321744	-0.0304438	cg02807192				shore	NA
138	chr17	75524062	75524155	3	4.54842e-10	0.012839	-0.0321744	-0.0304438	cg26534812				shore	NA
139	chr1	3634811	3635210	6	7.44025e-11	0.0129387	0.178854	0.084197	cg14084907	Body;Body;Body;Body	TP73;TP73;TP73;TP73		island	NA
139	chr1	3634811	3635210	6	7.44025e-11	0.0129387	0.178854	0.084197	cg08764037	Body;Body;Body;Body	TP73;TP73;TP73;TP73		island	NA
139	chr1	3634811	3635210	6	7.44025e-11	0.0129387	0.178854	0.084197	cg03760518	Body;Body;Body;Body	TP73;TP73;TP73;TP73		island	NA
139	chr1	3634811	3635210	6	7.44025e-11	0.0129387	0.178854	0.084197	cg06376715	Body;Body;Body;Body	TP73;TP73;TP73;TP73		island	NA
139	chr1	3634811	3635210	6	7.44025e-11	0.0129387	0.178854	0.084197	cg22039909	Body;Body;Body;Body	TP73;TP73;TP73;TP73		island	NA
139	chr1	3634811	3635210	6	7.44025e-11	0.0129387	0.178854	0.084197	cg25352980	Body;Body;Body;Body	TP73;TP73;TP73;TP73		shore	NA
140	chr14	101347044	101347358	6	9.85997e-15	0.0130533	-0.257189	-0.118919	cg23546343	1stExon;TSS200;TSS1500	RTL1;MIR431;MIR433	5hmC	shore	NA
140	chr14	101347044	101347358	6	9.85997e-15	0.0130533	-0.257189	-0.118919	cg06165706	1stExon;TSS200;TSS1500	RTL1;MIR431;MIR433	5hmC	shore	NA
140	chr14	101347044	101347358	6	9.85997e-15	0.0130533	-0.257189	-0.118919	cg18340059	1stExon;TSS200;TSS1500	RTL1;MIR431;MIR433	5hmC	shore	NA
140	chr14	101347044	101347358	6	9.85997e-15	0.0130533	-0.257189	-0.118919	cg15516314	1stExon;TSS200;TSS1500	RTL1;MIR431;MIR433	5hmC	shore	NA
140	chr14	101347044	101347358	6	9.85997e-15	0.0130533	-0.257189	-0.118919	cg02022380	TSS1500;1stExon;TSS1500;3'UTR	MIR431;RTL1;MIR433;RTL1		shore	NA
140	chr14	101347044	101347358	6	9.85997e-15	0.0130533	-0.257189	-0.118919	cg07087646	Body;1stExon;TSS1500	MIR431;RTL1;MIR433		shore	NA
141	chr12	52215972	52216298	5	6.29334e-11	0.0131449	-0.129842	-0.0987916	cg26697033	TSS200	FIGNL2		shore	NA
141	chr12	52215972	52216298	5	6.29334e-11	0.0131449	-0.129842	-0.0987916	cg07529392	1stExon	FIGNL2		island	NA
141	chr12	52215972	52216298	5	6.29334e-11	0.0131449	-0.129842	-0.0987916	cg06074307	TSS200	FIGNL2		shore	NA
141	chr12	52215972	52216298	5	6.29334e-11	0.0131449	-0.129842	-0.0987916	cg13431962	TSS200	FIGNL2		shore	NA
141	chr12	52215972	52216298	5	6.29334e-11	0.0131449	-0.129842	-0.0987916	cg09266551	TSS200	FIGNL2		shore	NA
142	chr10	29759227	29759299	2	2.83618e-10	0.0133789	-0.151208	-0.150893	cg17096262	Body;Body	SVIL;SVIL		open sea	NA
142	chr10	29759227	29759299	2	2.83618e-10	0.0133789	-0.151208	-0.150893	cg26508239	Body;Body	SVIL;SVIL		open sea	V$FOXO1_02;V$FOXO3_01;V$FOXO4_02;V$FREAC2_01;V$FREAC7_01
143	chr17	48913317	48913424	3	3.34832e-14	0.0140437	-0.120968	-0.0958567	cg06442865	1stExon	WFIKKN2		open sea	NA
143	chr17	48913317	48913424	3	3.34832e-14	0.0140437	-0.120968	-0.0958567	cg14350358	1stExon	WFIKKN2		open sea	NA
143	chr17	48913317	48913424	3	3.34832e-14	0.0140437	-0.120968	-0.0958567	cg11280756	1stExon	WFIKKN2		open sea	NA
144	chr1	11708564	11709271	5	1.90452e-13	0.0145194	0.115237	0.0740238	cg25276694	Body	FBXO2		island	NA
144	chr1	11708564	11709271	5	1.90452e-13	0.0145194	0.115237	0.0740238	cg24878594	3'UTR	FBXO2		shore	NA
144	chr1	11708564	11709271	5	1.90452e-13	0.0145194	0.115237	0.0740238	cg13986670	Body	FBXO2		island	V$CP2_01;V$RREB1_01
144	chr1	11708564	11709271	5	1.90452e-13	0.0145194	0.115237	0.0740238	cg00085122	Body	FBXO2		island	NA
144	chr1	11708564	11709271	5	1.90452e-13	0.0145194	0.115237	0.0740238	cg18792022	Body	FBXO2		island	NA
145	chr4	25090198	25090665	6	1.26237e-12	0.0146532	-0.0414742	-0.0228742	cg17688837				shore	NA
145	chr4	25090198	25090665	6	1.26237e-12	0.0146532	-0.0414742	-0.0228742	cg06759629				island	NA
145	chr4	25090198	25090665	6	1.26237e-12	0.0146532	-0.0414742	-0.0228742	cg01218619				island	NA
145	chr4	25090198	25090665	6	1.26237e-12	0.0146532	-0.0414742	-0.0228742	cg19312667				island	NA
145	chr4	25090198	25090665	6	1.26237e-12	0.0146532	-0.0414742	-0.0228742	cg02428792				shore	NA
145	chr4	25090198	25090665	6	1.26237e-12	0.0146532	-0.0414742	-0.0228742	cg26262055				shore	NA
146	chr2	128158047	128159058	6	1.04643e-17	0.014822	-0.170665	-0.0998081	cg13226232				island	NA
146	chr2	128158047	128159058	6	1.04643e-17	0.014822	-0.170665	-0.0998081	cg02280644				island	NA
146	chr2	128158047	128159058	6	1.04643e-17	0.014822	-0.170665	-0.0998081	cg00551088				shore	NA
146	chr2	128158047	128159058	6	1.04643e-17	0.014822	-0.170665	-0.0998081	cg25568114				island	NA
146	chr2	128158047	128159058	6	1.04643e-17	0.014822	-0.170665	-0.0998081	cg05582690				island	NA
146	chr2	128158047	128159058	6	1.04643e-17	0.014822	-0.170665	-0.0998081	cg11909975				shore	NA
147	chr1	244952269	244952394	3	1.97225e-15	0.014942	-0.21613	-0.170631	cg03596681				open sea	NA
147	chr1	244952269	244952394	3	1.97225e-15	0.014942	-0.21613	-0.170631	cg04345751				open sea	NA
147	chr1	244952269	244952394	3	1.97225e-15	0.014942	-0.21613	-0.170631	cg24462001				open sea	NA
148	chr10	134073307	134073911	4	3.02134e-11	0.0151568	-0.1494	-0.0904615	cg25197240	Body	STK32C	5hmC	shore	NA
148	chr10	134073307	134073911	4	3.02134e-11	0.0151568	-0.1494	-0.0904615	cg08386897	Body	STK32C	5hmC	shore	NA
148	chr10	134073307	134073911	4	3.02134e-11	0.0151568	-0.1494	-0.0904615	cg10843401	Body	STK32C	5hmC	shore	NA
148	chr10	134073307	134073911	4	3.02134e-11	0.0151568	-0.1494	-0.0904615	cg24158028	Body	STK32C		shore	NA
149	chr17	79792777	79793795	12	2.00921e-13	0.0153194	-0.122304	-0.0550466	cg21320221	TSS200	DYSFIP1	5hmC	shore	NA
149	chr17	79792777	79793795	12	2.00921e-13	0.0153194	-0.122304	-0.0550466	cg23596678	TSS200	DYSFIP1	5hmC	shore	NA
149	chr17	79792777	79793795	12	2.00921e-13	0.0153194	-0.122304	-0.0550466	cg24380489	TSS200	DYSFIP1	5hmC	shore	NA
149	chr17	79792777	79793795	12	2.00921e-13	0.0153194	-0.122304	-0.0550466	cg02862897	TSS200	DYSFIP1	5hmC	shore	NA
149	chr17	79792777	79793795	12	2.00921e-13	0.0153194	-0.122304	-0.0550466	cg02408850	TSS1500	DYSFIP1	5hmC	shore	NA
149	chr17	79792777	79793795	12	2.00921e-13	0.0153194	-0.122304	-0.0550466	cg12008350	TSS1500	DYSFIP1	5hmC	shore	NA
149	chr17	79792777	79793795	12	2.00921e-13	0.0153194	-0.122304	-0.0550466	cg00666559	TSS1500	DYSFIP1	5hmC	shore	NA
149	chr17	79792777	79793795	12	2.00921e-13	0.0153194	-0.122304	-0.0550466	cg03750525	TSS1500	DYSFIP1	5hmC	shelf	NA
149	chr17	79792777	79793795	12	2.00921e-13	0.0153194	-0.122304	-0.0550466	cg26066277	1stExon	DYSFIP1		shore	NA
149	chr17	79792777	79793795	12	2.00921e-13	0.0153194	-0.122304	-0.0550466	cg23708206	5'UTR;1stExon	DYSFIP1;DYSFIP1		shore	NA
149	chr17	79792777	79793795	12	2.00921e-13	0.0153194	-0.122304	-0.0550466	cg26657725	TSS200	DYSFIP1		shore	NA
149	chr17	79792777	79793795	12	2.00921e-13	0.0153194	-0.122304	-0.0550466	cg12713445	TSS200	DYSFIP1		shore	NA
150	chr17	80858539	80859946	7	6.90845e-13	0.015384	-0.168547	-0.0642712	cg06791695	Body	TBCD	5hmC	shelf	NA
150	chr17	80858539	80859946	7	6.90845e-13	0.015384	-0.168547	-0.0642712	cg08153595	Body	TBCD	5hmC	shelf	NA
150	chr17	80858539	80859946	7	6.90845e-13	0.015384	-0.168547	-0.0642712	cg25022289	Body	TBCD	5hmC	shelf	NA
150	chr17	80858539	80859946	7	6.90845e-13	0.015384	-0.168547	-0.0642712	cg21376658	Body	TBCD	5hmC	shelf	NA
150	chr17	80858539	80859946	7	6.90845e-13	0.015384	-0.168547	-0.0642712	cg17579154	Body	TBCD		shore	NA
150	chr17	80858539	80859946	7	6.90845e-13	0.015384	-0.168547	-0.0642712	cg22990129	Body	TBCD		shore	NA
150	chr17	80858539	80859946	7	6.90845e-13	0.015384	-0.168547	-0.0642712	cg02768197	Body	TBCD		shore	NA
150	chr17	80858539	80859946	7	6.90845e-13	0.015384	-0.168547	-0.0642712	cg23549774	Body	TBCD		shore	NA
151	chr6	30420981	30421376	10	6.02716e-12	0.0153931	0.128518	0.0644411	cg26922678			BS	shore	NA
151	chr6	30420981	30421376	10	6.02716e-12	0.0153931	0.128518	0.0644411	cg15946590			BS	shore	NA
151	chr6	30420981	30421376	10	6.02716e-12	0.0153931	0.128518	0.0644411	cg05685892			BS	shore	NA
151	chr6	30420981	30421376	10	6.02716e-12	0.0153931	0.128518	0.0644411	cg08710841			BS	shore	NA
151	chr6	30420981	30421376	10	6.02716e-12	0.0153931	0.128518	0.0644411	cg19116197			BS	shore	NA
151	chr6	30420981	30421376	10	6.02716e-12	0.0153931	0.128518	0.0644411	cg23778943			BS	shore	NA
151	chr6	30420981	30421376	10	6.02716e-12	0.0153931	0.128518	0.0644411	cg26690915			BS	shore	NA
151	chr6	30420981	30421376	10	6.02716e-12	0.0153931	0.128518	0.0644411	cg09289820			BS	shore	NA
151	chr6	30420981	30421376	10	6.02716e-12	0.0153931	0.128518	0.0644411	cg01975734			BS	shore	NA
151	chr6	30420981	30421376	10	6.02716e-12	0.0153931	0.128518	0.0644411	cg26310483			BS	shore	NA
152	chr8	145721560	145722190	5	7.16773e-14	0.0156023	-0.122283	-0.0793041	cg00994323	TSS1500	PPP1R16A		shelf	NA
152	chr8	145721560	145722190	5	7.16773e-14	0.0156023	-0.122283	-0.0793041	cg21518261	TSS1500	PPP1R16A		shelf	NA
152	chr8	145721560	145722190	5	7.16773e-14	0.0156023	-0.122283	-0.0793041	cg26078439	TSS1500	PPP1R16A		shelf	NA
152	chr8	145721560	145722190	5	7.16773e-14	0.0156023	-0.122283	-0.0793041	cg12515371	TSS200	PPP1R16A		shelf	NA
152	chr8	145721560	145722190	5	7.16773e-14	0.0156023	-0.122283	-0.0793041	cg22563697	5'UTR;1stExon	PPP1R16A;PPP1R16A		shelf	NA
153	chr19	58982330	58982507	2	9.57754e-11	0.0157576	-0.186693	-0.154225	cg24124365	Body	ZNF324		island	NA
153	chr19	58982330	58982507	2	9.57754e-11	0.0157576	-0.186693	-0.154225	cg07100957	Body	ZNF324		island	NA
154	chr17	8924093	8924309	2	3.7509e-21	0.015861	0.178268	0.105828	cg14615768	TSS1500	NTN1		shore	NA
154	chr17	8924093	8924309	2	3.7509e-21	0.015861	0.178268	0.105828	cg17072465	TSS1500	NTN1		island	V$PAX3_01
155	chr14	104639296	104639580	2	9.22026e-11	0.0159371	-0.134332	-0.0928585	cg01539224	Body	KIF26A		island	NA
155	chr14	104639296	104639580	2	9.22026e-11	0.0159371	-0.134332	-0.0928585	cg26181907	Body	KIF26A		island	NA
156	chr17	6899758	6900356	4	6.99515e-11	0.0162132	-0.140697	-0.103629	cg05657792	Body	ALOX12		island	NA
156	chr17	6899758	6900356	4	6.99515e-11	0.0162132	-0.140697	-0.103629	cg25987502	Body	ALOX12		island	NA
156	chr17	6899758	6900356	4	6.99515e-11	0.0162132	-0.140697	-0.103629	cg08946332	Body	ALOX12		island	NA
156	chr17	6899758	6900356	4	6.99515e-11	0.0162132	-0.140697	-0.103629	cg22741997	Body	ALOX12		island	NA
157	chr12	102271755	102272136	2	1.20818e-14	0.0163563	0.108632	0.0715571	cg07905054	Body	DRAM1		shore	NA
157	chr12	102271755	102272136	2	1.20818e-14	0.0163563	0.108632	0.0715571	cg19722371	Body	DRAM1		island	NA
158	chr6	33588219	33588302	3	3.2779e-10	0.0165365	0.0631534	0.0407356	cg24603235	TSS1500	ITPR3		shore	NA
158	chr6	33588219	33588302	3	3.2779e-10	0.0165365	0.0631534	0.0407356	cg19889152	TSS1500	ITPR3		shore	NA
158	chr6	33588219	33588302	3	3.2779e-10	0.0165365	0.0631534	0.0407356	cg14639225	TSS1500	ITPR3		shore	NA
159	chr19	40728617	40729386	4	3.36052e-14	0.0167723	-0.120503	-0.0696396	cg10722426	Body	CNTD2		island	NA
159	chr19	40728617	40729386	4	3.36052e-14	0.0167723	-0.120503	-0.0696396	cg26456563	3'UTR	CNTD2		island	NA
159	chr19	40728617	40729386	4	3.36052e-14	0.0167723	-0.120503	-0.0696396	cg08871608	Body	CNTD2		island	NA
159	chr19	40728617	40729386	4	3.36052e-14	0.0167723	-0.120503	-0.0696396	cg19605788	Body	CNTD2		island	NA
160	chr2	242665522	242666066	5	5.22903e-12	0.0169086	-0.184638	-0.130792	cg21244745	3'UTR	ING5		shore	NA
160	chr2	242665522	242666066	5	5.22903e-12	0.0169086	-0.184638	-0.130792	cg17530031	3'UTR	ING5		shore	NA
160	chr2	242665522	242666066	5	5.22903e-12	0.0169086	-0.184638	-0.130792	cg15141204	3'UTR	ING5		shore	NA
160	chr2	242665522	242666066	5	5.22903e-12	0.0169086	-0.184638	-0.130792	cg20896437	3'UTR	ING5		shore	NA
160	chr2	242665522	242666066	5	5.22903e-12	0.0169086	-0.184638	-0.130792	cg13262212	3'UTR	ING5		shore	NA
161	chr22	50644361	50645200	6	8.88206e-30	0.01697	-0.253621	-0.101471	cg25934700	Body	SELO	5hmC	island	NA
161	chr22	50644361	50645200	6	8.88206e-30	0.01697	-0.253621	-0.101471	cg16919420	Body	SELO	5hmC	island	V$PAX2_01;V$HTF_01;V$XBP1_01
161	chr22	50644361	50645200	6	8.88206e-30	0.01697	-0.253621	-0.101471	cg10201084	Body	SELO	5hmC	shore	NA
161	chr22	50644361	50645200	6	8.88206e-30	0.01697	-0.253621	-0.101471	cg07366553	Body	SELO	5hmC	shore	NA
161	chr22	50644361	50645200	6	8.88206e-30	0.01697	-0.253621	-0.101471	cg21874862	Body	SELO	5hmC	island	NA
161	chr22	50644361	50645200	6	8.88206e-30	0.01697	-0.253621	-0.101471	cg24993400	Body	SELO	5hmC	shore	NA
162	chr12	53612551	53613154	4	1.10317e-18	0.0171864	-0.0586209	-0.0387886	cg13937905	Body;Body	RARG;RARG		shore	NA
162	chr12	53612551	53613154	4	1.10317e-18	0.0171864	-0.0586209	-0.0387886	cg10592478	Body;Body	RARG;RARG		shore	NA
162	chr12	53612551	53613154	4	1.10317e-18	0.0171864	-0.0586209	-0.0387886	cg09107344	Body;Body	RARG;RARG		shore	NA
162	chr12	53612551	53613154	4	1.10317e-18	0.0171864	-0.0586209	-0.0387886	cg20059012	Body;Body	RARG;RARG		shore	NA
163	chr15	101389272	101389394	3	5.03222e-10	0.01723	-0.153931	-0.136407	cg17221377			BS	shore	NA
163	chr15	101389272	101389394	3	5.03222e-10	0.01723	-0.153931	-0.136407	cg25878441			BS	shore	NA
163	chr15	101389272	101389394	3	5.03222e-10	0.01723	-0.153931	-0.136407	cg16548362			BS	shore	NA
164	chr7	157890968	157891327	2	1.02126e-19	0.0172832	-0.13737	-0.129049	cg07879612	Body;Body;Body	PTPRN2;PTPRN2;PTPRN2	5hmC	island	NA
164	chr7	157890968	157891327	2	1.02126e-19	0.0172832	-0.13737	-0.129049	cg11053171	Body;Body;Body	PTPRN2;PTPRN2;PTPRN2	5hmC	island	NA
165	chr17	72915897	72916000	2	1.81016e-10	0.0176757	-0.185504	-0.167622	cg22674497	Body	USH1G		island	NA
165	chr17	72915897	72916000	2	1.81016e-10	0.0176757	-0.185504	-0.167622	cg06697425	Body	USH1G		island	NA
166	chr8	143427461	143427976	5	5.27393e-11	0.0177887	-0.254935	-0.120364	cg06454464	Body	TSNARE1	5hmC	shore	NA
166	chr8	143427461	143427976	5	5.27393e-11	0.0177887	-0.254935	-0.120364	cg22931466	Body	TSNARE1	5hmC	shore	NA
166	chr8	143427461	143427976	5	5.27393e-11	0.0177887	-0.254935	-0.120364	cg11926839	Body	TSNARE1	5hmC	shore	NA
166	chr8	143427461	143427976	5	5.27393e-11	0.0177887	-0.254935	-0.120364	cg17372408	Body	TSNARE1	5hmC	shore	NA
166	chr8	143427461	143427976	5	5.27393e-11	0.0177887	-0.254935	-0.120364	cg23890910	Body	TSNARE1	5hmC	shore	NA
166	chr8	143427461	143427976	5	5.27393e-11	0.0177887	-0.254935	-0.120364	cg05202073	Body	TSNARE1		shore	NA
167	chr16	8806359	8807043	13	9.92088e-20	0.0178199	-0.0685068	-0.0296059	cg01881182	5'UTR;TSS1500	ABAT;ABAT		open sea	NA
167	chr16	8806359	8807043	13	9.92088e-20	0.0178199	-0.0685068	-0.0296059	cg05372963	5'UTR;1stExon;5'UTR	ABAT;ABAT;ABAT		open sea	NA
167	chr16	8806359	8807043	13	9.92088e-20	0.0178199	-0.0685068	-0.0296059	cg07336964	5'UTR;TSS1500	ABAT;ABAT		open sea	NA
167	chr16	8806359	8807043	13	9.92088e-20	0.0178199	-0.0685068	-0.0296059	cg16586594	5'UTR;TSS1500	ABAT;ABAT		open sea	NA
167	chr16	8806359	8807043	13	9.92088e-20	0.0178199	-0.0685068	-0.0296059	cg26778345	5'UTR;TSS1500	ABAT;ABAT		open sea	NA
167	chr16	8806359	8807043	13	9.92088e-20	0.0178199	-0.0685068	-0.0296059	cg08241330	5'UTR;TSS200	ABAT;ABAT		open sea	NA
167	chr16	8806359	8807043	13	9.92088e-20	0.0178199	-0.0685068	-0.0296059	cg08834902	5'UTR;TSS200	ABAT;ABAT		open sea	V$MEIS1_01
167	chr16	8806359	8807043	13	9.92088e-20	0.0178199	-0.0685068	-0.0296059	cg00231389	5'UTR;TSS200	ABAT;ABAT		open sea	V$RFX1_02
167	chr16	8806359	8807043	13	9.92088e-20	0.0178199	-0.0685068	-0.0296059	cg00220102	5'UTR;TSS200	ABAT;ABAT		open sea	V$RFX1_02
167	chr16	8806359	8807043	13	9.92088e-20	0.0178199	-0.0685068	-0.0296059	cg04332619	5'UTR;1stExon;5'UTR	ABAT;ABAT;ABAT		open sea	NA
167	chr16	8806359	8807043	13	9.92088e-20	0.0178199	-0.0685068	-0.0296059	cg01221157	5'UTR;1stExon;5'UTR	ABAT;ABAT;ABAT		open sea	NA
167	chr16	8806359	8807043	13	9.92088e-20	0.0178199	-0.0685068	-0.0296059	cg10292855	5'UTR;1stExon;5'UTR	ABAT;ABAT;ABAT		open sea	NA
167	chr16	8806359	8807043	13	9.92088e-20	0.0178199	-0.0685068	-0.0296059	cg26915924	5'UTR;1stExon;5'UTR	ABAT;ABAT;ABAT		open sea	NA
168	chr12	132293520	132293702	3	5.77943e-10	0.018256	-0.193257	-0.142113	cg05650719				island	NA
168	chr12	132293520	132293702	3	5.77943e-10	0.018256	-0.193257	-0.142113	cg04876069				island	NA
168	chr12	132293520	132293702	3	5.77943e-10	0.018256	-0.193257	-0.142113	cg26750617				island	NA
169	chr5	471171	471385	3	4.87102e-12	0.0182961	-0.105951	-0.0782243	cg10902033	Body	LOC25845	BS	shore	NA
169	chr5	471171	471385	3	4.87102e-12	0.0182961	-0.105951	-0.0782243	cg02379784	Body	LOC25845	BS	shore	NA
169	chr5	471171	471385	3	4.87102e-12	0.0182961	-0.105951	-0.0782243	cg18329423	Body	LOC25845	BS	shore	NA
170	chr7	5520933	5521770	6	5.12144e-12	0.0185305	-0.149382	-0.0890909	cg04305325	Body	FBXL18	5hmC	island	NA
170	chr7	5520933	5521770	6	5.12144e-12	0.0185305	-0.149382	-0.0890909	cg16554627	3'UTR	FBXL18	5hmC	shore	NA
170	chr7	5520933	5521770	6	5.12144e-12	0.0185305	-0.149382	-0.0890909	cg04784014	3'UTR	FBXL18	5hmC	shore	NA
170	chr7	5520933	5521770	6	5.12144e-12	0.0185305	-0.149382	-0.0890909	cg02356002	Body	FBXL18	5hmC	island	NA
170	chr7	5520933	5521770	6	5.12144e-12	0.0185305	-0.149382	-0.0890909	cg11155002	Body	FBXL18	5hmC	island	NA
170	chr7	5520933	5521770	6	5.12144e-12	0.0185305	-0.149382	-0.0890909	cg13877423	Body	FBXL18		shore	NA
171	chr2	233749413	233750055	6	1.9602e-12	0.0186133	-0.122159	-0.0696839	cg21728844	Body;Body	NGEF;NGEF		open sea	NA
171	chr2	233749413	233750055	6	1.9602e-12	0.0186133	-0.122159	-0.0696839	cg16596103	Body;Body	NGEF;NGEF		open sea	NA
171	chr2	233749413	233750055	6	1.9602e-12	0.0186133	-0.122159	-0.0696839	cg20388707	Body;Body	NGEF;NGEF		open sea	NA
171	chr2	233749413	233750055	6	1.9602e-12	0.0186133	-0.122159	-0.0696839	cg06829186	Body;Body	NGEF;NGEF		open sea	NA
171	chr2	233749413	233750055	6	1.9602e-12	0.0186133	-0.122159	-0.0696839	cg03936315	Body;Body	NGEF;NGEF		open sea	NA
171	chr2	233749413	233750055	6	1.9602e-12	0.0186133	-0.122159	-0.0696839	cg24367967	Body;Body	NGEF;NGEF		open sea	NA
172	chr17	78866235	78866579	2	6.63498e-12	0.0186622	-0.108365	-0.100526	cg11476241	Body;Body	RPTOR;RPTOR		shelf	NA
172	chr17	78866235	78866579	2	6.63498e-12	0.0186622	-0.108365	-0.100526	cg24327522	Body;Body	RPTOR;RPTOR		shelf	NA
173	chr16	4732262	4733181	6	6.70816e-16	0.0189529	-0.176021	-0.0610809	cg03963853	Body;Body;Body;Body	MGRN1;MGRN1;MGRN1;MGRN1	5hmC	island	NA
173	chr16	4732262	4733181	6	6.70816e-16	0.0189529	-0.176021	-0.0610809	cg07248377	Body;Body;Body;Body	MGRN1;MGRN1;MGRN1;MGRN1	5hmC	island	NA
173	chr16	4732262	4733181	6	6.70816e-16	0.0189529	-0.176021	-0.0610809	cg00504410	Body;Body;Body;Body	MGRN1;MGRN1;MGRN1;MGRN1		island	NA
173	chr16	4732262	4733181	6	6.70816e-16	0.0189529	-0.176021	-0.0610809	cg10908196	Body;Body;Body;Body	MGRN1;MGRN1;MGRN1;MGRN1		island	NA
173	chr16	4732262	4733181	6	6.70816e-16	0.0189529	-0.176021	-0.0610809	cg01861603	Body;Body;Body;Body	MGRN1;MGRN1;MGRN1;MGRN1		island	NA
173	chr16	4732262	4733181	6	6.70816e-16	0.0189529	-0.176021	-0.0610809	cg16520815	Body;Body;Body;Body	MGRN1;MGRN1;MGRN1;MGRN1		island	NA
174	chr2	3063115	3063671	6	3.92733e-10	0.0190679	-0.133579	-0.0856105	cg05373263				shore	NA
174	chr2	3063115	3063671	6	3.92733e-10	0.0190679	-0.133579	-0.0856105	cg01290791				shore	NA
174	chr2	3063115	3063671	6	3.92733e-10	0.0190679	-0.133579	-0.0856105	cg02115559				shore	NA
174	chr2	3063115	3063671	6	3.92733e-10	0.0190679	-0.133579	-0.0856105	cg05698294				shore	NA
174	chr2	3063115	3063671	6	3.92733e-10	0.0190679	-0.133579	-0.0856105	cg06320642				island	NA
174	chr2	3063115	3063671	6	3.92733e-10	0.0190679	-0.133579	-0.0856105	cg19907479				island	NA
174	chr2	3063115	3063671	6	3.92733e-10	0.0190679	-0.133579	-0.0856105	cg23243474				island	NA
174	chr2	3063115	3063671	6	3.92733e-10	0.0190679	-0.133579	-0.0856105	cg07586391				island	NA
174	chr2	3063115	3063671	6	3.92733e-10	0.0190679	-0.133579	-0.0856105	cg06076512				island	NA
175	chr10	134971594	134972063	4	1.2025e-16	0.0192363	-0.140472	-0.0991502	cg15784580			5hmC	island	NA
175	chr10	134971594	134972063	4	1.2025e-16	0.0192363	-0.140472	-0.0991502	cg14372635			5hmC	shore	NA
175	chr10	134971594	134972063	4	1.2025e-16	0.0192363	-0.140472	-0.0991502	cg13580027				shore	NA
176	chr16	87551658	87552124	3	1.6033e-15	0.0194265	-0.126199	-0.0818363	cg07180475				open sea	NA
176	chr16	87551658	87552124	3	1.6033e-15	0.0194265	-0.126199	-0.0818363	cg03328360				open sea	NA
176	chr16	87551658	87552124	3	1.6033e-15	0.0194265	-0.126199	-0.0818363	cg02577580				open sea	NA
177	chr17	74018465	74018510	2	1.91837e-10	0.0200464	-0.175885	-0.135894	cg00282731	Body	EVPL		island	V$HEN1_02;V$LMO2COM_01
177	chr17	74018465	74018510	2	1.91837e-10	0.0200464	-0.175885	-0.135894	cg22608492	Body	EVPL		island	NA
178	chr7	158750384	158750417	2	5.44844e-10	0.0205454	-0.0885738	-0.0744548	cg11945929				island	NA
178	chr7	158750384	158750417	2	5.44844e-10	0.0205454	-0.0885738	-0.0744548	cg10079374				island	NA
179	chr16	1440498	1440688	3	2.9009e-10	0.0207973	-0.220384	-0.151343	cg09717923				island	NA
179	chr16	1440498	1440688	3	2.9009e-10	0.0207973	-0.220384	-0.151343	cg06458258				island	NA
179	chr16	1440498	1440688	3	2.9009e-10	0.0207973	-0.220384	-0.151343	cg23103675				island	NA
180	chr11	528207	528653	4	7.24149e-18	0.0208588	-0.167871	-0.0968477	cg21039438			5hmC	open sea	NA
180	chr11	528207	528653	4	7.24149e-18	0.0208588	-0.167871	-0.0968477	cg15343812			5hmC	open sea	NA
180	chr11	528207	528653	4	7.24149e-18	0.0208588	-0.167871	-0.0968477	cg13167353			5hmC	open sea	NA
180	chr11	528207	528653	4	7.24149e-18	0.0208588	-0.167871	-0.0968477	cg13226968			5hmC	open sea	NA
181	chr7	1716623	1717324	4	8.99503e-18	0.02124	-0.172673	-0.0963959	cg07826246				open sea	NA
181	chr7	1716623	1717324	4	8.99503e-18	0.02124	-0.172673	-0.0963959	cg12510512				open sea	NA
181	chr7	1716623	1717324	4	8.99503e-18	0.02124	-0.172673	-0.0963959	cg16172864				open sea	NA
181	chr7	1716623	1717324	4	8.99503e-18	0.02124	-0.172673	-0.0963959	cg13665021				open sea	NA
182	chr5	143026740	143026910	2	1.1116e-11	0.0212918	-0.206143	-0.136729	cg13291607				open sea	NA
182	chr5	143026740	143026910	2	1.1116e-11	0.0212918	-0.206143	-0.136729	cg23194776				open sea	NA
183	chr19	3648642	3648690	2	6.58736e-10	0.0213209	-0.178538	-0.112187	cg02859655	Body	PIP5K1C		island	NA
183	chr19	3648642	3648690	2	6.58736e-10	0.0213209	-0.178538	-0.112187	cg20969388	Body	PIP5K1C		island	NA
184	chr16	89357477	89358232	4	7.29497e-16	0.0213981	-0.161857	-0.0978584	cg09220891	Body	ANKRD11		open sea	NA
184	chr16	89357477	89358232	4	7.29497e-16	0.0213981	-0.161857	-0.0978584	cg09776094	Body	ANKRD11		open sea	NA
184	chr16	89357477	89358232	4	7.29497e-16	0.0213981	-0.161857	-0.0978584	cg27207530	Body	ANKRD11		open sea	NA
184	chr16	89357477	89358232	4	7.29497e-16	0.0213981	-0.161857	-0.0978584	cg02487202	Body	ANKRD11		open sea	NA
185	chr17	80862597	80862764	2	3.32331e-12	0.0219818	-0.168547	-0.146263	cg25020142	Body	TBCD		shore	NA
185	chr17	80862597	80862764	2	3.32331e-12	0.0219818	-0.168547	-0.146263	cg16218516	Body	TBCD		shore	NA
186	chr10	82295723	82296072	3	2.83512e-10	0.0220753	-0.087785	-0.0806416	cg24440658				island	NA
186	chr10	82295723	82296072	3	2.83512e-10	0.0220753	-0.087785	-0.0806416	cg15642854				island	NA
186	chr10	82295723	82296072	3	2.83512e-10	0.0220753	-0.087785	-0.0806416	cg09981929				island	NA
187	chr7	157502370	157502620	4	1.27223e-16	0.0221361	-0.1284	-0.0767169	cg13816552	Body;Body;Body	PTPRN2;PTPRN2;PTPRN2	5hmC	shore	NA
187	chr7	157502370	157502620	4	1.27223e-16	0.0221361	-0.1284	-0.0767169	cg13401196	Body;Body;Body	PTPRN2;PTPRN2;PTPRN2	5hmC	shore	NA
187	chr7	157502370	157502620	4	1.27223e-16	0.0221361	-0.1284	-0.0767169	cg11340881	Body;Body;Body	PTPRN2;PTPRN2;PTPRN2	5hmC	shore	NA
187	chr7	157502370	157502620	4	1.27223e-16	0.0221361	-0.1284	-0.0767169	cg00231927	Body;Body;Body	PTPRN2;PTPRN2;PTPRN2	5hmC	shore	NA
188	chr17	839526	839839	3	4.13035e-18	0.0223987	-0.116511	-0.0848856	cg10065210	Body	NXN	5hmC	open sea	NA
188	chr17	839526	839839	3	4.13035e-18	0.0223987	-0.116511	-0.0848856	cg26003785	Body	NXN	5hmC	open sea	NA
188	chr17	839526	839839	3	4.13035e-18	0.0223987	-0.116511	-0.0848856	cg04300161	Body	NXN		open sea	NA
189	chr11	70257280	70257555	2	7.68168e-12	0.0224571	-0.165003	-0.160884	cg09522613	Body;Body	CTTN;CTTN		island	NA
189	chr11	70257280	70257555	2	7.68168e-12	0.0224571	-0.165003	-0.160884	cg11263997	Body;Body	CTTN;CTTN		island	NA
190	chr6	10099432	10099656	3	2.95779e-10	0.0233933	-0.101633	-0.0837229	cg16613240				open sea	NA
190	chr6	10099432	10099656	3	2.95779e-10	0.0233933	-0.101633	-0.0837229	cg01256227				open sea	NA
190	chr6	10099432	10099656	3	2.95779e-10	0.0233933	-0.101633	-0.0837229	cg09285851				open sea	NA
191	chr20	36572422	36573019	4	8.10713e-13	0.0239036	-0.140164	-0.0846526	cg09337248	Body	VSTM2L	5hmC	island	NA
191	chr20	36572422	36573019	4	8.10713e-13	0.0239036	-0.140164	-0.0846526	cg17071589	3'UTR	VSTM2L	5hmC	island	NA
191	chr20	36572422	36573019	4	8.10713e-13	0.0239036	-0.140164	-0.0846526	cg17868287	Body	VSTM2L		island	V$AHRARNT_02;V$PAX2_01
191	chr20	36572422	36573019	4	8.10713e-13	0.0239036	-0.140164	-0.0846526	cg08580545	3'UTR	VSTM2L		shore	NA
192	chr10	71177158	71177172	3	1.0893e-11	0.0245685	-0.145144	-0.0819104	cg18675128	TSS1500	TACR2	5hmC	open sea	NA
192	chr10	71177158	71177172	3	1.0893e-11	0.0245685	-0.145144	-0.0819104	cg02303677	TSS1500	TACR2	5hmC	open sea	NA
192	chr10	71177158	71177172	3	1.0893e-11	0.0245685	-0.145144	-0.0819104	cg26866174	TSS1500	TACR2	5hmC	open sea	NA
193	chr2	241611931	241612421	5	1.2752e-11	0.0254508	-0.167708	-0.0875369	cg22040202				island	NA
193	chr2	241611931	241612421	5	1.2752e-11	0.0254508	-0.167708	-0.0875369	cg01231921				island	NA
193	chr2	241611931	241612421	5	1.2752e-11	0.0254508	-0.167708	-0.0875369	cg23290121				island	NA
193	chr2	241611931	241612421	5	1.2752e-11	0.0254508	-0.167708	-0.0875369	cg02367133				island	NA
193	chr2	241611931	241612421	5	1.2752e-11	0.0254508	-0.167708	-0.0875369	cg10393227				island	NA
194	chr17	10102232	10102558	4	2.1109e-13	0.0255209	-0.0354406	-0.0236593	cg06339542	TSS1500	GAS7		island	NA
194	chr17	10102232	10102558	4	2.1109e-13	0.0255209	-0.0354406	-0.0236593	cg19011844	TSS1500	GAS7		island	NA
194	chr17	10102232	10102558	4	2.1109e-13	0.0255209	-0.0354406	-0.0236593	cg24513224	TSS1500	GAS7		island	NA
194	chr17	10102232	10102558	4	2.1109e-13	0.0255209	-0.0354406	-0.0236593	cg13991233	TSS1500	GAS7		shore	NA
195	chr5	2111458	2112561	8	1.98219e-21	0.0255907	0.0759752	-0.00869339	cg03540794				island	NA
195	chr5	2111458	2112561	8	1.98219e-21	0.0255907	0.0759752	-0.00869339	cg16288562				shore	NA
195	chr5	2111458	2112561	8	1.98219e-21	0.0255907	0.0759752	-0.00869339	cg23319696				island	NA
195	chr5	2111458	2112561	8	1.98219e-21	0.0255907	0.0759752	-0.00869339	cg04475936				island	V$ZID_01
195	chr5	2111458	2112561	8	1.98219e-21	0.0255907	0.0759752	-0.00869339	cg13294846				island	NA
195	chr5	2111458	2112561	8	1.98219e-21	0.0255907	0.0759752	-0.00869339	cg20933239				island	NA
195	chr5	2111458	2112561	8	1.98219e-21	0.0255907	0.0759752	-0.00869339	cg23008238				island	NA
195	chr5	2111458	2112561	8	1.98219e-21	0.0255907	0.0759752	-0.00869339	cg02534659				shore	NA
196	chr7	2764503	2764599	2	3.65682e-10	0.0259513	-0.234559	-0.140142	cg06624267				open sea	NA
196	chr7	2764503	2764599	2	3.65682e-10	0.0259513	-0.234559	-0.140142	cg03366574				open sea	NA
197	chr4	2943901	2944178	2	1.45173e-10	0.0261944	-0.155353	-0.104891	cg14264079	Body;Body	C4orf10;NOP14		open sea	NA
197	chr4	2943901	2944178	2	1.45173e-10	0.0261944	-0.155353	-0.104891	cg27217555	Body;Body	C4orf10;NOP14		open sea	NA
198	chr13	45768695	45768901	2	2.32682e-14	0.0266081	-0.101153	-0.057998	cg21457147	Body;Body	GTF2F2;KCTD4		open sea	NA
198	chr13	45768695	45768901	2	2.32682e-14	0.0266081	-0.101153	-0.057998	cg04439215	5'UTR;Body	KCTD4;GTF2F2		open sea	NA
199	chr1	3511710	3512243	5	2.57033e-12	0.0270666	-0.151967	-0.0924706	cg20707157	Body	MEGF6		island	NA
199	chr1	3511710	3512243	5	2.57033e-12	0.0270666	-0.151967	-0.0924706	cg20826162	Body	MEGF6		island	NA
199	chr1	3511710	3512243	5	2.57033e-12	0.0270666	-0.151967	-0.0924706	cg25361694	Body	MEGF6		island	NA
199	chr1	3511710	3512243	5	2.57033e-12	0.0270666	-0.151967	-0.0924706	cg17153775	Body	MEGF6		island	NA
199	chr1	3511710	3512243	5	2.57033e-12	0.0270666	-0.151967	-0.0924706	cg03957235	Body	MEGF6		shore	NA
200	chr1	158111350	158111495	2	2.9009e-10	0.0274687	-0.0970348	-0.0735731	cg17859359				open sea	NA
200	chr1	158111350	158111495	2	2.9009e-10	0.0274687	-0.0970348	-0.0735731	cg11136041				open sea	NA
201	chr12	132691719	132692186	4	8.00218e-11	0.0278928	-0.114456	-0.0797583	cg04678868	Body;TSS1500	GALNT9;GALNT9		shore	NA
201	chr12	132691719	132692186	4	8.00218e-11	0.0278928	-0.114456	-0.0797583	cg05133340	Body;TSS1500	GALNT9;GALNT9		shore	NA
201	chr12	132691719	132692186	4	8.00218e-11	0.0278928	-0.114456	-0.0797583	cg17083475	Body;TSS1500	GALNT9;GALNT9		shore	NA
201	chr12	132691719	132692186	4	8.00218e-11	0.0278928	-0.114456	-0.0797583	cg14702541	Body	GALNT9		shore	NA
202	chr16	86715152	86715554	3	1.01511e-10	0.0281684	-0.09982	-0.0843176	cg00962707				shore	NA
202	chr16	86715152	86715554	3	1.01511e-10	0.0281684	-0.09982	-0.0843176	cg01063579				island	NA
202	chr16	86715152	86715554	3	1.01511e-10	0.0281684	-0.09982	-0.0843176	cg01627212				shore	NA
203	chr6	170450803	170451590	3	2.47957e-21	0.0283644	-0.130218	-0.0799476	cg26806713				shore	NA
203	chr6	170450803	170451590	3	2.47957e-21	0.0283644	-0.130218	-0.0799476	cg00929465				shore	NA
203	chr6	170450803	170451590	3	2.47957e-21	0.0283644	-0.130218	-0.0799476	cg01957150				island	NA
204	chr14	102680187	102680429	2	2.34775e-10	0.0285876	-0.158692	-0.112358	cg20897046	Body	WDR20		shore	NA
204	chr14	102680187	102680429	2	2.34775e-10	0.0285876	-0.158692	-0.112358	cg10182244	Body	WDR20		island	NA
204	chr14	102680187	102680429	2	2.34775e-10	0.0285876	-0.158692	-0.112358	cg16783572	Body	WDR20		island	NA
205	chr1	92012148	92012499	3	1.54033e-10	0.028689	0.159688	0.109058	cg12403142			BS	island	NA
205	chr1	92012148	92012499	3	1.54033e-10	0.028689	0.159688	0.109058	cg05527459			BS	shore	NA
205	chr1	92012148	92012499	3	1.54033e-10	0.028689	0.159688	0.109058	cg21854759				island	NA
206	chr1	9664205	9664395	4	7.85715e-11	0.0290688	-0.11915	-0.0769035	cg15685988	Body;3'UTR	TMEM201;TMEM201		open sea	NA
206	chr1	9664205	9664395	4	7.85715e-11	0.0290688	-0.11915	-0.0769035	cg14258107	Body;3'UTR	TMEM201;TMEM201		open sea	NA
206	chr1	9664205	9664395	4	7.85715e-11	0.0290688	-0.11915	-0.0769035	cg26824326	Body;3'UTR	TMEM201;TMEM201		open sea	NA
206	chr1	9664205	9664395	4	7.85715e-11	0.0290688	-0.11915	-0.0769035	cg03741850	Body;3'UTR	TMEM201;TMEM201		open sea	NA
207	chr17	74524852	74525125	3	5.45448e-10	0.0290982	-0.13314	-0.0859402	cg24126567	Body	CYGB		open sea	NA
207	chr17	74524852	74525125	3	5.45448e-10	0.0290982	-0.13314	-0.0859402	cg24726137	Body	CYGB		open sea	NA
207	chr17	74524852	74525125	3	5.45448e-10	0.0290982	-0.13314	-0.0859402	cg11814882	Body	CYGB		open sea	NA
208	chr3	47890815	47891476	7	2.03484e-21	0.0296411	-0.17947	-0.0628021	cg24450180	Body;Body	DHX30;DHX30		island	NA
208	chr3	47890815	47891476	7	2.03484e-21	0.0296411	-0.17947	-0.0628021	cg15085006	Body;Body;TSS1500	DHX30;DHX30;MIR1226		shore	NA
208	chr3	47890815	47891476	7	2.03484e-21	0.0296411	-0.17947	-0.0628021	cg05411186	Body;Body;TSS200	DHX30;DHX30;MIR1226		shore	NA
208	chr3	47890815	47891476	7	2.03484e-21	0.0296411	-0.17947	-0.0628021	cg01090930	Body;Body;TSS200	DHX30;DHX30;MIR1226		shore	NA
208	chr3	47890815	47891476	7	2.03484e-21	0.0296411	-0.17947	-0.0628021	cg20173193	Body;Body	DHX30;DHX30		island	NA
208	chr3	47890815	47891476	7	2.03484e-21	0.0296411	-0.17947	-0.0628021	cg01484266	Body;Body	DHX30;DHX30		island	NA
208	chr3	47890815	47891476	7	2.03484e-21	0.0296411	-0.17947	-0.0628021	cg21069814	Body;Body	DHX30;DHX30		island	V$ZID_01
209	chr12	132976722	132976866	2	3.28984e-10	0.0299245	0.0608782	0.0607159	cg22245980				shore	NA
209	chr12	132976722	132976866	2	3.28984e-10	0.0299245	0.0608782	0.0607159	cg04574346				island	NA
210	chr22	30639611	30639730	2	5.19009e-11	0.0300654	-0.127614	-0.0402606	cg02375178	3'UTR	LIF		shore	NA
210	chr22	30639611	30639730	2	5.19009e-11	0.0300654	-0.127614	-0.0402606	cg07316313	Body	LIF		island	NA
211	chr17	80329944	80330901	8	5.87213e-16	0.0301763	-0.159894	-0.0622598	cg13391313				shore	NA
211	chr17	80329944	80330901	8	5.87213e-16	0.0301763	-0.159894	-0.0622598	cg09224821				island	NA
211	chr17	80329944	80330901	8	5.87213e-16	0.0301763	-0.159894	-0.0622598	cg26149244				island	NA
211	chr17	80329944	80330901	8	5.87213e-16	0.0301763	-0.159894	-0.0622598	cg26090619				island	NA
211	chr17	80329944	80330901	8	5.87213e-16	0.0301763	-0.159894	-0.0622598	cg23389808				shore	NA
211	chr17	80329944	80330901	8	5.87213e-16	0.0301763	-0.159894	-0.0622598	cg16423811	TSS1500	UTS2R		shore	NA
211	chr17	80329944	80330901	8	5.87213e-16	0.0301763	-0.159894	-0.0622598	cg10634115	TSS1500	UTS2R		shore	NA
211	chr17	80329944	80330901	8	5.87213e-16	0.0301763	-0.159894	-0.0622598	cg04191236	TSS1500	UTS2R		shore	NA
212	chr10	11386143	11386866	4	8.32204e-21	0.0301969	-0.136208	-0.0778128	cg12488005				shore	NA
212	chr10	11386143	11386866	4	8.32204e-21	0.0301969	-0.136208	-0.0778128	cg22935192				island	NA
212	chr10	11386143	11386866	4	8.32204e-21	0.0301969	-0.136208	-0.0778128	cg02939598				island	NA
212	chr10	11386143	11386866	4	8.32204e-21	0.0301969	-0.136208	-0.0778128	cg02464921				island	NA
213	chr16	4748915	4749556	6	9.92922e-12	0.0302064	-0.153142	-0.0966741	cg00387982	Body	ANKS3	5hmC	open sea	NA
213	chr16	4748915	4749556	6	9.92922e-12	0.0302064	-0.153142	-0.0966741	cg03681679	Body	ANKS3	5hmC	open sea	NA
213	chr16	4748915	4749556	6	9.92922e-12	0.0302064	-0.153142	-0.0966741	cg00181419	Body	ANKS3	5hmC	open sea	NA
213	chr16	4748915	4749556	6	9.92922e-12	0.0302064	-0.153142	-0.0966741	cg09466397	Body	ANKS3	5hmC	open sea	NA
213	chr16	4748915	4749556	6	9.92922e-12	0.0302064	-0.153142	-0.0966741	cg09851072	Body	ANKS3	5hmC	open sea	NA
213	chr16	4748915	4749556	6	9.92922e-12	0.0302064	-0.153142	-0.0966741	cg26544435	Body	ANKS3	5hmC	open sea	NA
214	chr16	1217652	1217857	2	4.65974e-10	0.0305291	-0.0409816	-0.0357572	cg09242293	Body;Body	CACNA1H;CACNA1H		shore	NA
214	chr16	1217652	1217857	2	4.65974e-10	0.0305291	-0.0409816	-0.0357572	cg07687354	Body;Body	CACNA1H;CACNA1H		shore	NA
215	chr17	3850285	3851110	4	2.25059e-40	0.0307179	-0.190982	-0.127653	cg13561792	Body;Body;Body;Body;Body;Body;Body	ATP2A3;ATP2A3;ATP2A3;ATP2A3;ATP2A3;ATP2A3;ATP2A3	5hmC	shore	NA
215	chr17	3850285	3851110	4	2.25059e-40	0.0307179	-0.190982	-0.127653	cg05158913	Body;Body;Body;Body;Body;Body;Body	ATP2A3;ATP2A3;ATP2A3;ATP2A3;ATP2A3;ATP2A3;ATP2A3	5hmC	island	NA
215	chr17	3850285	3851110	4	2.25059e-40	0.0307179	-0.190982	-0.127653	cg19849151	Body;Body;Body;Body;Body;Body;Body	ATP2A3;ATP2A3;ATP2A3;ATP2A3;ATP2A3;ATP2A3;ATP2A3	5hmC	island	NA
215	chr17	3850285	3851110	4	2.25059e-40	0.0307179	-0.190982	-0.127653	cg11869281	Body;Body;Body;Body;Body;Body;Body	ATP2A3;ATP2A3;ATP2A3;ATP2A3;ATP2A3;ATP2A3;ATP2A3	5hmC	island	NA
216	chr16	10912331	10912718	6	2.32959e-15	0.0307852	-0.0795672	-0.0291131	cg02007567	TSS200	FAM18A	BS	island	NA
216	chr16	10912331	10912718	6	2.32959e-15	0.0307852	-0.0795672	-0.0291131	cg09175009	TSS200	FAM18A	BS	island	NA
216	chr16	10912331	10912718	6	2.32959e-15	0.0307852	-0.0795672	-0.0291131	cg26952618	1stExon;5'UTR	FAM18A;FAM18A	BS	island	NA
216	chr16	10912331	10912718	6	2.32959e-15	0.0307852	-0.0795672	-0.0291131	cg09684846	TSS200	FAM18A	BS	island	NA
216	chr16	10912331	10912718	6	2.32959e-15	0.0307852	-0.0795672	-0.0291131	cg21839338	Body	FAM18A		island	NA
216	chr16	10912331	10912718	6	2.32959e-15	0.0307852	-0.0795672	-0.0291131	cg03309770	1stExon;5'UTR	FAM18A;FAM18A		island	NA
217	chr1	37513430	37513490	2	1.62832e-10	0.0313714	-0.0552364	-0.0425454	cg16557698				open sea	NA
217	chr1	37513430	37513490	2	1.62832e-10	0.0313714	-0.0552364	-0.0425454	cg14178083				open sea	NA
217	chr1	37513430	37513490	2	1.62832e-10	0.0313714	-0.0552364	-0.0425454	cg09363841				open sea	NA
218	chr13	20735316	20735370	4	7.221e-10	0.0317093	-0.0614148	-0.0292745	cg03384979	TSS200	GJA3		island	NA
218	chr13	20735316	20735370	4	7.221e-10	0.0317093	-0.0614148	-0.0292745	cg20367421	TSS200	GJA3		island	NA
218	chr13	20735316	20735370	4	7.221e-10	0.0317093	-0.0614148	-0.0292745	cg13530621	TSS200	GJA3		island	NA
218	chr13	20735316	20735370	4	7.221e-10	0.0317093	-0.0614148	-0.0292745	cg17049889	TSS200	GJA3		island	NA
219	chr20	62368956	62369504	4	8.70171e-13	0.0317376	-0.0535262	-0.0387276	cg21849932	Body	LIME1		island	NA
219	chr20	62368956	62369504	4	8.70171e-13	0.0317376	-0.0535262	-0.0387276	cg18725573	Body	LIME1		island	NA
219	chr20	62368956	62369504	4	8.70171e-13	0.0317376	-0.0535262	-0.0387276	cg01176363	Body	LIME1		island	NA
219	chr20	62368956	62369504	4	8.70171e-13	0.0317376	-0.0535262	-0.0387276	cg05643964	Body	LIME1		island	NA
220	chr6	88854953	88855255	2	1.97867e-12	0.03203	-0.0996845	-0.0734911	cg21572719	5'UTR;5'UTR;TSS200;5'UTR;5'UTR;5'UTR	CNR1;CNR1;CNR1;CNR1;CNR1;CNR1		open sea	NA
220	chr6	88854953	88855255	2	1.97867e-12	0.03203	-0.0996845	-0.0734911	cg24276445	Body;Body;1stExon;Body;Body;Body	CNR1;CNR1;CNR1;CNR1;CNR1;CNR1		open sea	NA
221	chr2	10192422	10192518	3	1.09613e-12	0.0325596	-0.176165	-0.110856	cg21047938	Body	KLF11		open sea	NA
221	chr2	10192422	10192518	3	1.09613e-12	0.0325596	-0.176165	-0.110856	cg07966251	Body	KLF11		open sea	NA
221	chr2	10192422	10192518	3	1.09613e-12	0.0325596	-0.176165	-0.110856	cg03454669	Body	KLF11		open sea	NA
222	chr5	76937963	76937980	2	3.49981e-11	0.0330207	-0.0647154	-0.0528394	cg26327666				shore	NA
222	chr5	76937963	76937980	2	3.49981e-11	0.0330207	-0.0647154	-0.0528394	cg17355329				shore	NA
223	chr19	4371730	4371934	3	1.44269e-11	0.0331826	-0.12079	-0.0885178	cg26930135	Body	SH3GL1		island	NA
223	chr19	4371730	4371934	3	1.44269e-11	0.0331826	-0.12079	-0.0885178	cg08186575	Body	SH3GL1		island	NA
223	chr19	4371730	4371934	3	1.44269e-11	0.0331826	-0.12079	-0.0885178	cg24928938	Body	SH3GL1		island	NA
224	chr16	88804373	88804971	4	2.14366e-24	0.033627	-0.154816	-0.113405	cg06855137	Body	FAM38A	5hmC	shore	NA
224	chr16	88804373	88804971	4	2.14366e-24	0.033627	-0.154816	-0.113405	cg02443732	Body	FAM38A	5hmC	shore	NA
224	chr16	88804373	88804971	4	2.14366e-24	0.033627	-0.154816	-0.113405	cg10366867	Body	FAM38A	5hmC	shore	NA
224	chr16	88804373	88804971	4	2.14366e-24	0.033627	-0.154816	-0.113405	cg07067448	Body	FAM38A	5hmC	shore	V$E2F_02
225	chr21	46876658	46876904	2	2.11654e-11	0.0345325	0.15402	0.131469	cg10415509	Body;Body;Body	COL18A1;COL18A1;COL18A1		shore	NA
225	chr21	46876658	46876904	2	2.11654e-11	0.0345325	0.15402	0.131469	cg04622125	Body;Body;1stExon	COL18A1;COL18A1;COL18A1		island	NA
226	chr17	43663208	43663579	2	3.81216e-12	0.0348168	-0.0280779	-0.0243567	cg22968622				island	NA
226	chr17	43663208	43663579	2	3.81216e-12	0.0348168	-0.0280779	-0.0243567	cg17117718				island	NA
227	chr1	228503693	228503882	3	1.37065e-12	0.0350852	-0.212553	-0.140891	cg18857768	Body;Body	OBSCN;OBSCN		island	V$XBP1_01
227	chr1	228503693	228503882	3	1.37065e-12	0.0350852	-0.212553	-0.140891	cg03419458	Body;Body	OBSCN;OBSCN		island	NA
227	chr1	228503693	228503882	3	1.37065e-12	0.0350852	-0.212553	-0.140891	cg08881871	Body;Body	OBSCN;OBSCN		island	NA
228	chr2	215675105	215675637	4	3.21824e-15	0.035213	0.13019	0.0704833	cg24607575	TSS1500	BARD1		shore	NA
228	chr2	215675105	215675637	4	3.21824e-15	0.035213	0.13019	0.0704833	cg12091944	TSS1500	BARD1		shore	NA
228	chr2	215675105	215675637	4	3.21824e-15	0.035213	0.13019	0.0704833	cg24715680	TSS1500	BARD1		shore	NA
228	chr2	215675105	215675637	4	3.21824e-15	0.035213	0.13019	0.0704833	cg08563601	TSS1500	BARD1		shore	NA
229	chr10	134221503	134222218	5	3.74062e-13	0.0356309	-0.108093	-0.0699871	cg13506288	3'UTR;Body	PWWP2B;PWWP2B		shelf	NA
229	chr10	134221503	134222218	5	3.74062e-13	0.0356309	-0.108093	-0.0699871	cg00818106	3'UTR;Body	PWWP2B;PWWP2B		shore	NA
229	chr10	134221503	134222218	5	3.74062e-13	0.0356309	-0.108093	-0.0699871	cg08751508	3'UTR;Body	PWWP2B;PWWP2B		shelf	NA
229	chr10	134221503	134222218	5	3.74062e-13	0.0356309	-0.108093	-0.0699871	cg06547490	3'UTR;Body	PWWP2B;PWWP2B		shelf	NA
229	chr10	134221503	134222218	5	3.74062e-13	0.0356309	-0.108093	-0.0699871	cg00045902	3'UTR;Body	PWWP2B;PWWP2B		shelf	NA
230	chr15	89876213	89876978	5	8.74568e-20	0.0359221	-0.162234	-0.0677645	cg14480343	Body;Body	POLG;POLG		island	NA
230	chr15	89876213	89876978	5	8.74568e-20	0.0359221	-0.162234	-0.0677645	cg04001880	Body;Body	POLG;POLG		shore	NA
230	chr15	89876213	89876978	5	8.74568e-20	0.0359221	-0.162234	-0.0677645	cg04339246	Body;Body	POLG;POLG		island	NA
230	chr15	89876213	89876978	5	8.74568e-20	0.0359221	-0.162234	-0.0677645	cg27576615	Body;Body	POLG;POLG		island	NA
230	chr15	89876213	89876978	5	8.74568e-20	0.0359221	-0.162234	-0.0677645	cg10843046	Body;Body	POLG;POLG		shore	NA
231	chr19	46526100	46526508	8	6.51591e-13	0.0361104	0.140737	0.055825	cg12215528	1stExon	PGLYRP1		island	NA
231	chr19	46526100	46526508	8	6.51591e-13	0.0361104	0.140737	0.055825	cg14001023	1stExon;5'UTR	PGLYRP1;PGLYRP1		island	NA
231	chr19	46526100	46526508	8	6.51591e-13	0.0361104	0.140737	0.055825	cg07519471	1stExon	PGLYRP1		island	NA
231	chr19	46526100	46526508	8	6.51591e-13	0.0361104	0.140737	0.055825	cg08693172	TSS200	PGLYRP1		island	NA
231	chr19	46526100	46526508	8	6.51591e-13	0.0361104	0.140737	0.055825	cg22559329	TSS200	PGLYRP1		shore	NA
231	chr19	46526100	46526508	8	6.51591e-13	0.0361104	0.140737	0.055825	cg10862535	TSS200	PGLYRP1		shore	NA
231	chr19	46526100	46526508	8	6.51591e-13	0.0361104	0.140737	0.055825	cg08682981	TSS200	PGLYRP1		shore	NA
231	chr19	46526100	46526508	8	6.51591e-13	0.0361104	0.140737	0.055825	cg26767632	TSS200	PGLYRP1		shore	NA
232	chr12	111757755	111758092	3	8.39849e-18	0.0361653	-0.132248	-0.0982466	cg04195892	Body	CUX2		island	NA
232	chr12	111757755	111758092	3	8.39849e-18	0.0361653	-0.132248	-0.0982466	cg22147968	Body	CUX2		island	NA
232	chr12	111757755	111758092	3	8.39849e-18	0.0361653	-0.132248	-0.0982466	cg01252513	Body	CUX2		island	NA
233	chr8	144461130	144462851	11	1.84876e-13	0.0365652	-0.187998	-0.094394	cg23961973	Body	RHPN1		shore	NA
233	chr8	144461130	144462851	11	1.84876e-13	0.0365652	-0.187998	-0.094394	cg22437276	Body	RHPN1		island	NA
233	chr8	144461130	144462851	11	1.84876e-13	0.0365652	-0.187998	-0.094394	cg14437072	Body	RHPN1		shore	NA
233	chr8	144461130	144462851	11	1.84876e-13	0.0365652	-0.187998	-0.094394	cg13074173	Body	RHPN1		island	NA
233	chr8	144461130	144462851	11	1.84876e-13	0.0365652	-0.187998	-0.094394	cg22914595	Body	RHPN1		island	NA
233	chr8	144461130	144462851	11	1.84876e-13	0.0365652	-0.187998	-0.094394	cg24187101	Body	RHPN1		island	NA
233	chr8	144461130	144462851	11	1.84876e-13	0.0365652	-0.187998	-0.094394	cg23041896	Body	RHPN1		island	V$ROAZ_01
233	chr8	144461130	144462851	11	1.84876e-13	0.0365652	-0.187998	-0.094394	cg15678861	Body	RHPN1		shore	NA
233	chr8	144461130	144462851	11	1.84876e-13	0.0365652	-0.187998	-0.094394	cg10787409	Body	RHPN1		island	NA
233	chr8	144461130	144462851	11	1.84876e-13	0.0365652	-0.187998	-0.094394	cg14317001	Body	RHPN1		island	NA
233	chr8	144461130	144462851	11	1.84876e-13	0.0365652	-0.187998	-0.094394	cg25555098	Body	RHPN1		island	NA
234	chr7	151421620	151422150	5	1.10948e-11	0.0368709	-0.16849	-0.120768	cg02387974	Body;Body	PRKAG2;PRKAG2		island	NA
234	chr7	151421620	151422150	5	1.10948e-11	0.0368709	-0.16849	-0.120768	cg01246802	Body;Body	PRKAG2;PRKAG2		shore	NA
234	chr7	151421620	151422150	5	1.10948e-11	0.0368709	-0.16849	-0.120768	cg12937183	Body;Body	PRKAG2;PRKAG2		island	NA
234	chr7	151421620	151422150	5	1.10948e-11	0.0368709	-0.16849	-0.120768	cg02752334	Body;Body	PRKAG2;PRKAG2		island	NA
234	chr7	151421620	151422150	5	1.10948e-11	0.0368709	-0.16849	-0.120768	cg16396223	Body;Body	PRKAG2;PRKAG2		island	NA
235	chr15	22992214	22992979	5	8.74611e-20	0.0373484	-0.164995	-0.0777468	cg02723913	Body;Body	CYFIP1;CYFIP1		open sea	NA
235	chr15	22992214	22992979	5	8.74611e-20	0.0373484	-0.164995	-0.0777468	cg22871797	Body;Body	CYFIP1;CYFIP1		open sea	NA
235	chr15	22992214	22992979	5	8.74611e-20	0.0373484	-0.164995	-0.0777468	cg06099188	Body;Body	CYFIP1;CYFIP1		open sea	NA
235	chr15	22992214	22992979	5	8.74611e-20	0.0373484	-0.164995	-0.0777468	cg17896808	Body;Body	CYFIP1;CYFIP1		open sea	NA
235	chr15	22992214	22992979	5	8.74611e-20	0.0373484	-0.164995	-0.0777468	cg05454389	Body;Body	CYFIP1;CYFIP1		open sea	NA
236	chr8	27182871	27183342	7	2.22187e-13	0.0376772	-0.0558054	-0.0219969	cg23693289	5'UTR;5'UTR;1stExon;5'UTR;5'UTR;1stExon	PTK2B;PTK2B;PTK2B;PTK2B;PTK2B;PTK2B	BS	island	NA
236	chr8	27182871	27183342	7	2.22187e-13	0.0376772	-0.0558054	-0.0219969	cg06815112	TSS1500;5'UTR;TSS200;5'UTR	PTK2B;PTK2B;PTK2B;PTK2B	BS	shore	NA
236	chr8	27182871	27183342	7	2.22187e-13	0.0376772	-0.0558054	-0.0219969	cg18234130	5'UTR;TSS200;5'UTR;TSS200	PTK2B;PTK2B;PTK2B;PTK2B	BS	shore	NA
236	chr8	27182871	27183342	7	2.22187e-13	0.0376772	-0.0558054	-0.0219969	cg21186296	5'UTR;TSS200;5'UTR;TSS200	PTK2B;PTK2B;PTK2B;PTK2B	BS	shore	NA
236	chr8	27182871	27183342	7	2.22187e-13	0.0376772	-0.0558054	-0.0219969	cg23736307	5'UTR;TSS200;5'UTR;TSS200	PTK2B;PTK2B;PTK2B;PTK2B	BS	shore	NA
236	chr8	27182871	27183342	7	2.22187e-13	0.0376772	-0.0558054	-0.0219969	cg07216194	5'UTR;TSS200;5'UTR;TSS200	PTK2B;PTK2B;PTK2B;PTK2B	BS	shore	NA
236	chr8	27182871	27183342	7	2.22187e-13	0.0376772	-0.0558054	-0.0219969	cg14221460	5'UTR;5'UTR;5'UTR;5'UTR	PTK2B;PTK2B;PTK2B;PTK2B	BS	island	NA
237	chr5	149546691	149546946	3	1.54033e-10	0.0378744	-0.120305	-0.0817633	cg23266594	1stExon	CDX1		island	V$PAX5_01
237	chr5	149546691	149546946	3	1.54033e-10	0.0378744	-0.120305	-0.0817633	cg11503274	Body	CDX1		island	NA
237	chr5	149546691	149546946	3	1.54033e-10	0.0378744	-0.120305	-0.0817633	cg00919055	Body	CDX1		island	NA
238	chr5	6348534	6348914	3	9.63855e-14	0.0387619	-0.188501	-0.100843	cg21622381				open sea	NA
238	chr5	6348534	6348914	3	9.63855e-14	0.0387619	-0.188501	-0.100843	cg08747034				open sea	NA
238	chr5	6348534	6348914	3	9.63855e-14	0.0387619	-0.188501	-0.100843	cg18772109				open sea	NA
239	chr17	40332420	40332792	3	4.12898e-15	0.039365	-0.0311018	-0.0185321	cg22120714	Body	KCNH4		shore	NA
239	chr17	40332420	40332792	3	4.12898e-15	0.039365	-0.0311018	-0.0185321	cg06427514	Body	KCNH4		island	NA
239	chr17	40332420	40332792	3	4.12898e-15	0.039365	-0.0311018	-0.0185321	cg23905542	Body	KCNH4		island	NA
240	chr4	83719895	83720629	10	1.78844e-12	0.0399528	-0.0410365	-0.0120823	cg13080195	5'UTR;5'UTR;1stExon;1stExon	SCD5;SCD5;SCD5;SCD5		island	NA
240	chr4	83719895	83720629	10	1.78844e-12	0.0399528	-0.0410365	-0.0120823	cg10972353	5'UTR;5'UTR;1stExon;1stExon	SCD5;SCD5;SCD5;SCD5		island	NA
240	chr4	83719895	83720629	10	1.78844e-12	0.0399528	-0.0410365	-0.0120823	cg26820911	TSS200;TSS200	SCD5;SCD5		island	NA
240	chr4	83719895	83720629	10	1.78844e-12	0.0399528	-0.0410365	-0.0120823	cg14825221	TSS200;TSS200	SCD5;SCD5		island	NA
240	chr4	83719895	83720629	10	1.78844e-12	0.0399528	-0.0410365	-0.0120823	cg02442412	TSS200;TSS200	SCD5;SCD5		island	NA
240	chr4	83719895	83720629	10	1.78844e-12	0.0399528	-0.0410365	-0.0120823	cg10724771	TSS200;TSS200	SCD5;SCD5		island	NA
240	chr4	83719895	83720629	10	1.78844e-12	0.0399528	-0.0410365	-0.0120823	cg20947775	TSS1500;TSS1500	SCD5;SCD5		island	NA
240	chr4	83719895	83720629	10	1.78844e-12	0.0399528	-0.0410365	-0.0120823	cg27147000	TSS1500;TSS1500	SCD5;SCD5		shore	NA
240	chr4	83719895	83720629	10	1.78844e-12	0.0399528	-0.0410365	-0.0120823	cg20740157	TSS1500;TSS1500	SCD5;SCD5		shore	NA
241	chr4	8109007	8109411	2	1.08625e-15	0.039975	-0.179506	-0.106521	cg04442017	Body;Body;Body;Body;Body;Body;Body	ABLIM2;ABLIM2;ABLIM2;ABLIM2;ABLIM2;ABLIM2;ABLIM2		open sea	NA
241	chr4	8109007	8109411	2	1.08625e-15	0.039975	-0.179506	-0.106521	cg14333520	Body;Body;Body;Body;Body;Body;Body	ABLIM2;ABLIM2;ABLIM2;ABLIM2;ABLIM2;ABLIM2;ABLIM2		open sea	NA
242	chr7	42267719	42268072	3	7.35312e-11	0.040671	0.0504978	0.00580903	cg06310816	5'UTR	GLI3		island	NA
242	chr7	42267719	42268072	3	7.35312e-11	0.040671	0.0504978	0.00580903	cg17390350	5'UTR	GLI3		island	NA
242	chr7	42267719	42268072	3	7.35312e-11	0.040671	0.0504978	0.00580903	cg02370770	5'UTR	GLI3		shore	NA
243	chr19	1953811	1955983	8	5.41255e-11	0.0408867	-0.234392	-0.119166	cg08552290	Body;5'UTR	C19orf34;CSNK1G2		island	NA
243	chr19	1953811	1955983	8	5.41255e-11	0.0408867	-0.234392	-0.119166	cg27582986	TSS1500;5'UTR	C19orf34;CSNK1G2		shore	NA
243	chr19	1953811	1955983	8	5.41255e-11	0.0408867	-0.234392	-0.119166	cg07527467	Body;5'UTR	C19orf34;CSNK1G2		island	NA
243	chr19	1953811	1955983	8	5.41255e-11	0.0408867	-0.234392	-0.119166	cg01471710	Body;5'UTR	C19orf34;CSNK1G2		island	NA
243	chr19	1953811	1955983	8	5.41255e-11	0.0408867	-0.234392	-0.119166	cg26984183	5'UTR;5'UTR	CSNK1G2;C19orf34		shore	NA
243	chr19	1953811	1955983	8	5.41255e-11	0.0408867	-0.234392	-0.119166	cg10610099	5'UTR;1stExon;5'UTR	CSNK1G2;C19orf34;C19orf34		shore	NA
243	chr19	1953811	1955983	8	5.41255e-11	0.0408867	-0.234392	-0.119166	cg11654037	TSS200;5'UTR	C19orf34;CSNK1G2		shore	NA
243	chr19	1953811	1955983	8	5.41255e-11	0.0408867	-0.234392	-0.119166	cg02968914	TSS1500;5'UTR	C19orf34;CSNK1G2		island	NA
243	chr19	1953811	1955983	8	5.41255e-11	0.0408867	-0.234392	-0.119166	cg02990598	TSS1500;5'UTR	C19orf34;CSNK1G2		island	NA
243	chr19	1953811	1955983	8	5.41255e-11	0.0408867	-0.234392	-0.119166	cg07946961	TSS1500;5'UTR	C19orf34;CSNK1G2		shore	NA
244	chr5	1324528	1325156	6	4.22449e-13	0.0410686	-0.221564	-0.121283	cg14500614	Body	CLPTM1L	5hmC	open sea	NA
244	chr5	1324528	1325156	6	4.22449e-13	0.0410686	-0.221564	-0.121283	cg06665485	Body	CLPTM1L	5hmC	open sea	NA
244	chr5	1324528	1325156	6	4.22449e-13	0.0410686	-0.221564	-0.121283	cg25077823	Body	CLPTM1L	5hmC	open sea	NA
244	chr5	1324528	1325156	6	4.22449e-13	0.0410686	-0.221564	-0.121283	cg02053265	Body	CLPTM1L	5hmC	open sea	NA
244	chr5	1324528	1325156	6	4.22449e-13	0.0410686	-0.221564	-0.121283	cg26720682	Body	CLPTM1L	5hmC	open sea	NA
244	chr5	1324528	1325156	6	4.22449e-13	0.0410686	-0.221564	-0.121283	cg09826697	Body	CLPTM1L	5hmC	open sea	NA
245	chr7	150109704	150110226	4	2.66005e-21	0.0430671	-0.187466	-0.0585317	cg09135201			5hmC	open sea	NA
245	chr7	150109704	150110226	4	2.66005e-21	0.0430671	-0.187466	-0.0585317	cg21104546			5hmC	open sea	NA
245	chr7	150109704	150110226	4	2.66005e-21	0.0430671	-0.187466	-0.0585317	cg10658768			5hmC	open sea	NA
245	chr7	150109704	150110226	4	2.66005e-21	0.0430671	-0.187466	-0.0585317	cg15391375			5hmC	open sea	NA
246	chr1	53925658	53926227	5	9.95472e-12	0.0440443	-0.127628	-0.078371	cg07220007	Body	DMRTB1	5hmC	island	NA
246	chr1	53925658	53926227	5	9.95472e-12	0.0440443	-0.127628	-0.078371	cg16252727	1stExon	DMRTB1	5hmC	island	NA
246	chr1	53925658	53926227	5	9.95472e-12	0.0440443	-0.127628	-0.078371	cg05885647	Body	DMRTB1	5hmC	island	NA
246	chr1	53925658	53926227	5	9.95472e-12	0.0440443	-0.127628	-0.078371	cg07203271	Body	DMRTB1	5hmC	island	NA
246	chr1	53925658	53926227	5	9.95472e-12	0.0440443	-0.127628	-0.078371	cg07598331	Body	DMRTB1		island	NA
247	chr6	31779308	31779620	7	6.32034e-11	0.0441091	-0.0921852	-0.0452183	cg09777095	Body	HSPA1L		shelf	NA
247	chr6	31779308	31779620	7	6.32034e-11	0.0441091	-0.0921852	-0.0452183	cg19628456	Body	HSPA1L		shelf	NA
247	chr6	31779308	31779620	7	6.32034e-11	0.0441091	-0.0921852	-0.0452183	cg12400664	Body	HSPA1L		shelf	NA
247	chr6	31779308	31779620	7	6.32034e-11	0.0441091	-0.0921852	-0.0452183	cg08167286	Body	HSPA1L		shelf	NA
247	chr6	31779308	31779620	7	6.32034e-11	0.0441091	-0.0921852	-0.0452183	cg04484826	Body	HSPA1L		shelf	NA
247	chr6	31779308	31779620	7	6.32034e-11	0.0441091	-0.0921852	-0.0452183	cg26097381	Body	HSPA1L		shelf	NA
247	chr6	31779308	31779620	7	6.32034e-11	0.0441091	-0.0921852	-0.0452183	cg13053202	Body	HSPA1L		shelf	NA
248	chr9	139140775	139140987	2	2.8276e-10	0.0442701	-0.0831391	-0.0678181	cg13513188				shore	NA
248	chr9	139140775	139140987	2	2.8276e-10	0.0442701	-0.0831391	-0.0678181	cg08938448				shore	NA
249	chr1	230457906	230458393	6	1.19948e-11	0.0447937	-0.073485	-0.0293119	cg05266497	3'UTR	PGBD5		open sea	NA
249	chr1	230457906	230458393	6	1.19948e-11	0.0447937	-0.073485	-0.0293119	cg04095826	3'UTR	PGBD5		open sea	NA
249	chr1	230457906	230458393	6	1.19948e-11	0.0447937	-0.073485	-0.0293119	cg03347632	3'UTR	PGBD5		open sea	NA
249	chr1	230457906	230458393	6	1.19948e-11	0.0447937	-0.073485	-0.0293119	cg05888583	3'UTR	PGBD5		open sea	NA
249	chr1	230457906	230458393	6	1.19948e-11	0.0447937	-0.073485	-0.0293119	cg27224809	3'UTR	PGBD5		open sea	NA
249	chr1	230457906	230458393	6	1.19948e-11	0.0447937	-0.073485	-0.0293119	cg21547054	3'UTR	PGBD5		open sea	NA
250	chr6	170268691	170268808	3	6.64344e-11	0.0450163	0.168798	0.100852	cg15288329				open sea	NA
250	chr6	170268691	170268808	3	6.64344e-11	0.0450163	0.168798	0.100852	cg09378448				open sea	NA
250	chr6	170268691	170268808	3	6.64344e-11	0.0450163	0.168798	0.100852	cg03363478				open sea	NA
251	chr17	81032067	81032822	4	2.33183e-13	0.0453456	-0.167138	-0.101309	cg25162533			5hmC	shore	NA
251	chr17	81032067	81032822	4	2.33183e-13	0.0453456	-0.167138	-0.101309	cg03950492				island	NA
251	chr17	81032067	81032822	4	2.33183e-13	0.0453456	-0.167138	-0.101309	cg07447845				island	NA
251	chr17	81032067	81032822	4	2.33183e-13	0.0453456	-0.167138	-0.101309	cg07394799				island	NA
252	chr7	158270995	158271757	3	1.24227e-29	0.0462945	-0.256945	-0.13772	cg04313978	Body;Body;Body	PTPRN2;PTPRN2;PTPRN2	5hmC	open sea	NA
252	chr7	158270995	158271757	3	1.24227e-29	0.0462945	-0.256945	-0.13772	cg17812313	Body;Body;Body	PTPRN2;PTPRN2;PTPRN2	5hmC	open sea	NA
252	chr7	158270995	158271757	3	1.24227e-29	0.0462945	-0.256945	-0.13772	cg08151051	Body;Body;Body	PTPRN2;PTPRN2;PTPRN2		open sea	NA
253	chr2	241721504	241722281	5	2.4613e-16	0.0462985	-0.263296	-0.129249	cg05116145	Body	KIF1A	5hmC	island	NA
253	chr2	241721504	241722281	5	2.4613e-16	0.0462985	-0.263296	-0.129249	cg01662942	Body	KIF1A	5hmC	island	NA
253	chr2	241721504	241722281	5	2.4613e-16	0.0462985	-0.263296	-0.129249	cg17500202	Body	KIF1A	5hmC	island	NA
253	chr2	241721504	241722281	5	2.4613e-16	0.0462985	-0.263296	-0.129249	cg22414499	Body	KIF1A	5hmC	shore	NA
253	chr2	241721504	241722281	5	2.4613e-16	0.0462985	-0.263296	-0.129249	cg17033457	Body	KIF1A		island	NA
254	chr6	31803294	31803832	6	1.17019e-11	0.0467829	-0.0717063	-0.0291898	cg14850580	5'UTR;5'UTR	C6orf48;C6orf48		shore	NA
254	chr6	31803294	31803832	6	1.17019e-11	0.0467829	-0.0717063	-0.0291898	cg24164884	5'UTR;5'UTR	C6orf48;C6orf48		shore	NA
254	chr6	31803294	31803832	6	1.17019e-11	0.0467829	-0.0717063	-0.0291898	cg15948916	5'UTR;5'UTR;TSS1500	C6orf48;C6orf48;SNORD52		shore	NA
254	chr6	31803294	31803832	6	1.17019e-11	0.0467829	-0.0717063	-0.0291898	cg26720073	5'UTR;5'UTR;TSS1500	C6orf48;C6orf48;SNORD52		shore	NA
254	chr6	31803294	31803832	6	1.17019e-11	0.0467829	-0.0717063	-0.0291898	cg12060786	5'UTR;5'UTR;TSS1500	C6orf48;C6orf48;SNORD52		shore	NA
254	chr6	31803294	31803832	6	1.17019e-11	0.0467829	-0.0717063	-0.0291898	cg21395626	5'UTR;5'UTR;TSS1500	C6orf48;C6orf48;SNORD52		shore	NA
255	chr10	133510829	133511418	2	4.82388e-19	0.0468688	-0.167006	-0.112857	cg02103843				shelf	NA
255	chr10	133510829	133511418	2	4.82388e-19	0.0468688	-0.167006	-0.112857	cg17227726				shelf	NA
256	chr5	1144488	1145044	4	4.7297e-11	0.0470566	-0.154659	-0.0897658	cg00080423				open sea	NA
256	chr5	1144488	1145044	4	4.7297e-11	0.0470566	-0.154659	-0.0897658	cg10921168				open sea	NA
256	chr5	1144488	1145044	4	4.7297e-11	0.0470566	-0.154659	-0.0897658	cg25589932				open sea	NA
256	chr5	1144488	1145044	4	4.7297e-11	0.0470566	-0.154659	-0.0897658	cg18836287				open sea	NA
257	chr6	28601269	28601519	14	2.81713e-13	0.0476179	-0.145729	-0.0697767	cg16731266				shore	NA
257	chr6	28601269	28601519	14	2.81713e-13	0.0476179	-0.145729	-0.0697767	cg07017437				shore	NA
257	chr6	28601269	28601519	14	2.81713e-13	0.0476179	-0.145729	-0.0697767	cg25653641				shore	NA
257	chr6	28601269	28601519	14	2.81713e-13	0.0476179	-0.145729	-0.0697767	cg22572476				shore	NA
257	chr6	28601269	28601519	14	2.81713e-13	0.0476179	-0.145729	-0.0697767	cg19488431				shore	NA
257	chr6	28601269	28601519	14	2.81713e-13	0.0476179	-0.145729	-0.0697767	cg27535677				shore	NA
257	chr6	28601269	28601519	14	2.81713e-13	0.0476179	-0.145729	-0.0697767	cg22497095				shore	NA
257	chr6	28601269	28601519	14	2.81713e-13	0.0476179	-0.145729	-0.0697767	cg26865747				shore	NA
257	chr6	28601269	28601519	14	2.81713e-13	0.0476179	-0.145729	-0.0697767	cg03759229				shore	NA
257	chr6	28601269	28601519	14	2.81713e-13	0.0476179	-0.145729	-0.0697767	cg13565129				shore	NA
257	chr6	28601269	28601519	14	2.81713e-13	0.0476179	-0.145729	-0.0697767	cg20851828				shore	NA
257	chr6	28601269	28601519	14	2.81713e-13	0.0476179	-0.145729	-0.0697767	cg14654363				shore	NA
257	chr6	28601269	28601519	14	2.81713e-13	0.0476179	-0.145729	-0.0697767	cg00990380				shore	NA
257	chr6	28601269	28601519	14	2.81713e-13	0.0476179	-0.145729	-0.0697767	cg12763978				shore	NA
258	chr7	158265485	158265561	2	1.30961e-10	0.0478184	-0.119726	-0.0810138	cg14157417	Body;Body;Body	PTPRN2;PTPRN2;PTPRN2		open sea	NA
258	chr7	158265485	158265561	2	1.30961e-10	0.0478184	-0.119726	-0.0810138	cg24204878	Body;Body;Body	PTPRN2;PTPRN2;PTPRN2		open sea	NA
259	chr21	43526662	43526787	2	5.92213e-14	0.0479153	-0.140558	-0.104929	cg03240473	Body;Body;Body	UMODL1;UMODL1;C21orf128		island	NA
259	chr21	43526662	43526787	2	5.92213e-14	0.0479153	-0.140558	-0.104929	cg09849774	Body;Body;Body	UMODL1;UMODL1;C21orf128		island	NA
260	chr5	74807308	74807542	3	2.98158e-10	0.0500715	-0.0204162	-0.0109965	cg02083373	Body;TSS200;TSS200;TSS200	COL4A3BP;COL4A3BP;POLK;COL4A3BP		island	NA
260	chr5	74807308	74807542	3	2.98158e-10	0.0500715	-0.0204162	-0.0109965	cg27061947	TSS1500;5'UTR;Body;1stExon;5'UTR;1stExon	POLK;COL4A3BP;COL4A3BP;COL4A3BP;COL4A3BP;COL4A3BP		island	NA
260	chr5	74807308	74807542	3	2.98158e-10	0.0500715	-0.0204162	-0.0109965	cg08957039	Body;TSS200;TSS200;TSS200	COL4A3BP;COL4A3BP;POLK;COL4A3BP		island	NA
261	chr7	2827064	2827233	2	9.41013e-14	0.0502475	-0.193378	-0.117102	cg18634690	Body	GNA12	5hmC	open sea	NA
261	chr7	2827064	2827233	2	9.41013e-14	0.0502475	-0.193378	-0.117102	cg19422369	Body	GNA12	5hmC	open sea	NA
262	chr7	158807362	158807979	2	2.74478e-16	0.0515288	-0.165398	-0.107035	cg00718175	Body	LOC154822		open sea	NA
262	chr7	158807362	158807979	2	2.74478e-16	0.0515288	-0.165398	-0.107035	cg26536863	Body	LOC154822		open sea	NA
263	chr7	1882776	1883251	4	1.83244e-10	0.0531288	-0.148529	-0.0901249	cg12432903	Body;Body;Body	MAD1L1;MAD1L1;MAD1L1		shore	NA
263	chr7	1882776	1883251	4	1.83244e-10	0.0531288	-0.148529	-0.0901249	cg08264122	Body;Body;Body	MAD1L1;MAD1L1;MAD1L1		shore	NA
263	chr7	1882776	1883251	4	1.83244e-10	0.0531288	-0.148529	-0.0901249	cg04871173	Body;Body;Body	MAD1L1;MAD1L1;MAD1L1		shore	NA
263	chr7	1882776	1883251	4	1.83244e-10	0.0531288	-0.148529	-0.0901249	cg26402169	Body;Body;Body	MAD1L1;MAD1L1;MAD1L1		shore	NA
263	chr7	1882776	1883251	4	1.83244e-10	0.0531288	-0.148529	-0.0901249	cg25814293	Body;Body;Body	MAD1L1;MAD1L1;MAD1L1		shore	NA
264	chr11	102826090	102826469	2	1.51173e-10	0.0531741	-0.0994953	-0.0880016	cg13041032	Body	MMP13		open sea	NA
264	chr11	102826090	102826469	2	1.51173e-10	0.0531741	-0.0994953	-0.0880016	cg22658979	TSS200	MMP13		open sea	NA
265	chr1	244007281	244007303	2	2.36502e-10	0.0533886	-0.133539	-0.0965965	cg19503731	TSS1500;TSS1500	AKT3;AKT3		open sea	NA
265	chr1	244007281	244007303	2	2.36502e-10	0.0533886	-0.133539	-0.0965965	cg22637834	TSS1500;TSS1500	AKT3;AKT3		open sea	NA
266	chr1	11713867	11714254	4	8.18304e-11	0.0534218	-0.0555442	-0.0373941	cg26829322	TSS1500;Body;TSS1500;TSS1500;TSS1500	FBXO44;FBXO2;FBXO44;FBXO44;FBXO44	BS	shore	NA
266	chr1	11713867	11714254	4	8.18304e-11	0.0534218	-0.0555442	-0.0373941	cg05796704	TSS1500;Body;TSS1500;TSS1500;TSS1500	FBXO44;FBXO2;FBXO44;FBXO44;FBXO44	BS	island	NA
266	chr1	11713867	11714254	4	8.18304e-11	0.0534218	-0.0555442	-0.0373941	cg22697136	TSS1500;Body;TSS1500;TSS200;TSS1500	FBXO44;FBXO2;FBXO44;FBXO44;FBXO44	BS	island	NA
266	chr1	11713867	11714254	4	8.18304e-11	0.0534218	-0.0555442	-0.0373941	cg01420388	TSS1500;Body;TSS1500;TSS200;TSS1500	FBXO44;FBXO2;FBXO44;FBXO44;FBXO44	BS	island	V$E2F_02
267	chr16	88974944	88975259	3	3.76395e-12	0.0541825	-0.0979822	-0.0416144	cg05267735	5'UTR;Body	CBFA2T3;CBFA2T3		shore	NA
267	chr16	88974944	88975259	3	3.76395e-12	0.0541825	-0.0979822	-0.0416144	cg02633398	5'UTR;Body	CBFA2T3;CBFA2T3		shore	NA
267	chr16	88974944	88975259	3	3.76395e-12	0.0541825	-0.0979822	-0.0416144	cg05489661	5'UTR;Body	CBFA2T3;CBFA2T3		shore	NA
268	chr16	750365	750399	2	9.37035e-11	0.0541964	-0.0739015	-0.0620421	cg27222295	5'UTR	FBXL16		shore	NA
268	chr16	750365	750399	2	9.37035e-11	0.0541964	-0.0739015	-0.0620421	cg06355570	5'UTR	FBXL16		island	NA
269	chr7	142970319	142970460	2	4.44286e-12	0.0543205	-0.178197	-0.110967	cg13976610			5hmC	open sea	NA
269	chr7	142970319	142970460	2	4.44286e-12	0.0543205	-0.178197	-0.110967	cg08161136			5hmC	open sea	NA
270	chr17	9548278	9548902	8	1.83891e-14	0.0563364	-0.0202493	-0.00326994	cg06934988	TSS200	USP43		island	NA
270	chr17	9548278	9548902	8	1.83891e-14	0.0563364	-0.0202493	-0.00326994	cg11855759	TSS200	USP43		island	NA
270	chr17	9548278	9548902	8	1.83891e-14	0.0563364	-0.0202493	-0.00326994	cg05332306	TSS1500	USP43		shore	NA
270	chr17	9548278	9548902	8	1.83891e-14	0.0563364	-0.0202493	-0.00326994	cg13408776	TSS1500	USP43		island	NA
270	chr17	9548278	9548902	8	1.83891e-14	0.0563364	-0.0202493	-0.00326994	cg24975662	TSS200	USP43		island	NA
270	chr17	9548278	9548902	8	1.83891e-14	0.0563364	-0.0202493	-0.00326994	cg14589466	TSS200	USP43		island	NA
270	chr17	9548278	9548902	8	1.83891e-14	0.0563364	-0.0202493	-0.00326994	cg12869623	TSS200	USP43		island	NA
270	chr17	9548278	9548902	8	1.83891e-14	0.0563364	-0.0202493	-0.00326994	cg14372333	TSS200	USP43		island	NA
271	chr14	105779532	105779952	5	1.07347e-10	0.0565441	0.143754	0.0853522	cg16162970	TSS1500;TSS1500	PACS2;PACS2		shore	NA
271	chr14	105779532	105779952	5	1.07347e-10	0.0565441	0.143754	0.0853522	cg14501119				shore	NA
271	chr14	105779532	105779952	5	1.07347e-10	0.0565441	0.143754	0.0853522	cg00241281	TSS1500;TSS1500	PACS2;PACS2		shore	NA
271	chr14	105779532	105779952	5	1.07347e-10	0.0565441	0.143754	0.0853522	cg09278107	TSS1500;TSS1500	PACS2;PACS2		shore	NA
271	chr14	105779532	105779952	5	1.07347e-10	0.0565441	0.143754	0.0853522	cg00808648	TSS1500;TSS1500	PACS2;PACS2		shore	NA
272	chr9	139582389	139582673	3	7.84851e-13	0.05779	-0.105501	-0.0168562	cg15720535	TSS1500;TSS1500	AGPAT2;AGPAT2		island	NA
272	chr9	139582389	139582673	3	7.84851e-13	0.05779	-0.105501	-0.0168562	cg03571320	TSS1500;TSS1500	AGPAT2;AGPAT2		island	NA
272	chr9	139582389	139582673	3	7.84851e-13	0.05779	-0.105501	-0.0168562	cg13422804	TSS1500;TSS1500	AGPAT2;AGPAT2		shore	NA
273	chr17	52946	52964	2	4.38639e-10	0.0594622	-0.105128	-0.0898705	cg16883805				shelf	NA
273	chr17	52946	52964	2	4.38639e-10	0.0594622	-0.105128	-0.0898705	cg20354929				shelf	NA
274	chr10	127464762	127465013	2	2.8886e-10	0.0612095	-0.125672	-0.0904002	cg12533479	TSS1500	MMP21		shore	NA
274	chr10	127464762	127465013	2	2.8886e-10	0.0612095	-0.125672	-0.0904002	cg04358037	TSS1500	MMP21		shore	NA
275	chr8	126441997	126442747	11	3.79469e-11	0.0625442	-0.0223972	-0.0111915	cg02700454	TSS1500	TRIB1		island	NA
275	chr8	126441997	126442747	11	3.79469e-11	0.0625442	-0.0223972	-0.0111915	cg04882727	TSS1500	TRIB1		island	NA
275	chr8	126441997	126442747	11	3.79469e-11	0.0625442	-0.0223972	-0.0111915	cg12286194	TSS200	TRIB1		island	NA
275	chr8	126441997	126442747	11	3.79469e-11	0.0625442	-0.0223972	-0.0111915	cg00184235	TSS200	TRIB1		island	NA
275	chr8	126441997	126442747	11	3.79469e-11	0.0625442	-0.0223972	-0.0111915	cg09504829	TSS200	TRIB1		island	NA
275	chr8	126441997	126442747	11	3.79469e-11	0.0625442	-0.0223972	-0.0111915	cg00627621	TSS200	TRIB1		island	V$HTF_01
275	chr8	126441997	126442747	11	3.79469e-11	0.0625442	-0.0223972	-0.0111915	cg02519415	TSS200	TRIB1		island	V$CEBPA_01;V$CEBPB_02
275	chr8	126441997	126442747	11	3.79469e-11	0.0625442	-0.0223972	-0.0111915	cg14389810	5'UTR;1stExon	TRIB1;TRIB1		island	NA
275	chr8	126441997	126442747	11	3.79469e-11	0.0625442	-0.0223972	-0.0111915	cg05316555	5'UTR;1stExon	TRIB1;TRIB1		island	NA
275	chr8	126441997	126442747	11	3.79469e-11	0.0625442	-0.0223972	-0.0111915	cg08715135	5'UTR;1stExon	TRIB1;TRIB1		island	NA
276	chr17	79031376	79031394	2	5.76824e-10	0.0626633	-0.0489567	-0.0367986	cg03926640	Body;Body;Body;Body	BAIAP2;BAIAP2;BAIAP2;BAIAP2		open sea	NA
276	chr17	79031376	79031394	2	5.76824e-10	0.0626633	-0.0489567	-0.0367986	cg12779301	Body;Body;Body;Body	BAIAP2;BAIAP2;BAIAP2;BAIAP2		open sea	V$MYCMAX_02
277	chr1	28198451	28198968	7	3.02495e-15	0.0627269	0.109888	0.0105144	cg09579933	TSS1500;TSS1500;TSS1500	C1orf38;C1orf38;C1orf38		shore	NA
277	chr1	28198451	28198968	7	3.02495e-15	0.0627269	0.109888	0.0105144	cg19251242	TSS1500;TSS1500;TSS1500	C1orf38;C1orf38;C1orf38		shore	NA
277	chr1	28198451	28198968	7	3.02495e-15	0.0627269	0.109888	0.0105144	cg00338002	TSS1500;TSS1500;TSS1500	C1orf38;C1orf38;C1orf38		shore	NA
277	chr1	28198451	28198968	7	3.02495e-15	0.0627269	0.109888	0.0105144	cg25015504	TSS200;TSS200;TSS200	C1orf38;C1orf38;C1orf38		shore	NA
277	chr1	28198451	28198968	7	3.02495e-15	0.0627269	0.109888	0.0105144	cg27565366	TSS200;TSS200;TSS200	C1orf38;C1orf38;C1orf38		shore	NA
277	chr1	28198451	28198968	7	3.02495e-15	0.0627269	0.109888	0.0105144	cg06936079	TSS200;TSS200;TSS200	C1orf38;C1orf38;C1orf38		shore	NA
277	chr1	28198451	28198968	7	3.02495e-15	0.0627269	0.109888	0.0105144	cg00856002	TSS200;TSS200;TSS200	C1orf38;C1orf38;C1orf38		shore	NA
278	chr10	135082008	135082349	5	5.07717e-16	0.0637205	-0.11734	-0.0751861	cg04225554	Body;Body;Body	ADAM8;ADAM8;ADAM8	5hmC	shore	NA
278	chr10	135082008	135082349	5	5.07717e-16	0.0637205	-0.11734	-0.0751861	cg07807481	Body;Body;Body	ADAM8;ADAM8;ADAM8	5hmC	island	NA
278	chr10	135082008	135082349	5	5.07717e-16	0.0637205	-0.11734	-0.0751861	cg03553964	Body;Body;Body	ADAM8;ADAM8;ADAM8	5hmC	island	NA
278	chr10	135082008	135082349	5	5.07717e-16	0.0637205	-0.11734	-0.0751861	cg13893566	Body;Body;Body	ADAM8;ADAM8;ADAM8	5hmC	island	NA
278	chr10	135082008	135082349	5	5.07717e-16	0.0637205	-0.11734	-0.0751861	cg05838113	Body;Body;Body	ADAM8;ADAM8;ADAM8	5hmC	island	NA
279	chr19	51529628	51529999	5	1.86278e-13	0.0656961	-0.117157	-0.057252	cg26310000	Body;5'UTR;1stExon;5'UTR;5'UTR	KLK11;KLK11;KLK11;KLK11;KLK11	5hmC	open sea	NA
279	chr19	51529628	51529999	5	1.86278e-13	0.0656961	-0.117157	-0.057252	cg19912337	Body;5'UTR;5'UTR;5'UTR	KLK11;KLK11;KLK11;KLK11	5hmC	open sea	NA
279	chr19	51529628	51529999	5	1.86278e-13	0.0656961	-0.117157	-0.057252	cg19318380	Body;5'UTR;TSS200;5'UTR	KLK11;KLK11;KLK11;KLK11	5hmC	open sea	NA
279	chr19	51529628	51529999	5	1.86278e-13	0.0656961	-0.117157	-0.057252	cg05267952	Body;5'UTR;TSS200;5'UTR	KLK11;KLK11;KLK11;KLK11	5hmC	open sea	NA
279	chr19	51529628	51529999	5	1.86278e-13	0.0656961	-0.117157	-0.057252	cg08814947	Body;5'UTR;TSS200;5'UTR	KLK11;KLK11;KLK11;KLK11	5hmC	open sea	NA
280	chr19	1108560	1108566	2	8.03982e-10	0.0657931	-0.281546	-0.178228	cg22597120	Body;Body	SBNO2;SBNO2		island	NA
280	chr19	1108560	1108566	2	8.03982e-10	0.0657931	-0.281546	-0.178228	cg24712567	Body;Body	SBNO2;SBNO2		island	NA
281	chr4	647322	647751	4	5.12085e-10	0.0669147	-0.171966	-0.0953697	cg11301215	5'UTR;Body;Body	PDE6B;PDE6B;PDE6B		shore	NA
281	chr4	647322	647751	4	5.12085e-10	0.0669147	-0.171966	-0.0953697	cg04795389	5'UTR;Body;Body	PDE6B;PDE6B;PDE6B		island	NA
281	chr4	647322	647751	4	5.12085e-10	0.0669147	-0.171966	-0.0953697	cg12616592	5'UTR;Body;Body	PDE6B;PDE6B;PDE6B		island	NA
281	chr4	647322	647751	4	5.12085e-10	0.0669147	-0.171966	-0.0953697	cg05198297	5'UTR;Body;Body	PDE6B;PDE6B;PDE6B		shore	NA
282	chr1	226074408	226075069	3	6.23545e-14	0.0673518	0.132336	0.00241627	cg11186155	3'UTR	LEFTY1		shore	NA
282	chr1	226074408	226075069	3	6.23545e-14	0.0673518	0.132336	0.00241627	cg01472176	Body	LEFTY1		shore	NA
282	chr1	226074408	226075069	3	6.23545e-14	0.0673518	0.132336	0.00241627	cg19817882	Body	LEFTY1		shore	NA
283	chr11	123396299	123396593	5	5.47656e-12	0.0689453	-0.0412366	-0.0227845	cg06174296	1stExon;5'UTR	GRAMD1B;GRAMD1B		open sea	NA
283	chr11	123396299	123396593	5	5.47656e-12	0.0689453	-0.0412366	-0.0227845	cg26393964	TSS1500	GRAMD1B		open sea	V$TATA_01
283	chr11	123396299	123396593	5	5.47656e-12	0.0689453	-0.0412366	-0.0227845	cg14374432	TSS200	GRAMD1B		open sea	NA
283	chr11	123396299	123396593	5	5.47656e-12	0.0689453	-0.0412366	-0.0227845	cg01699740	TSS200	GRAMD1B		open sea	V$YY1_02
283	chr11	123396299	123396593	5	5.47656e-12	0.0689453	-0.0412366	-0.0227845	cg04800788	1stExon;5'UTR	GRAMD1B;GRAMD1B		open sea	NA
284	chr14	75389066	75389280	4	4.54297e-13	0.069674	-0.0806623	-0.0377869	cg03030879	5'UTR;1stExon	RPS6KL1;RPS6KL1		shore	NA
284	chr14	75389066	75389280	4	4.54297e-13	0.069674	-0.0806623	-0.0377869	cg18664866	TSS200	RPS6KL1		shore	NA
284	chr14	75389066	75389280	4	4.54297e-13	0.069674	-0.0806623	-0.0377869	cg02858826	TSS200	RPS6KL1		shore	NA
284	chr14	75389066	75389280	4	4.54297e-13	0.069674	-0.0806623	-0.0377869	cg03394422	TSS200	RPS6KL1		shore	NA
285	chr4	3250226	3251386	11	2.39001e-17	0.0699975	-0.147073	-0.0624182	cg23210109	TSS200;TSS200	C4orf44;C4orf44		island	NA
285	chr4	3250226	3251386	11	2.39001e-17	0.0699975	-0.147073	-0.0624182	cg14017193	TSS200;TSS200	C4orf44;C4orf44		island	NA
285	chr4	3250226	3251386	11	2.39001e-17	0.0699975	-0.147073	-0.0624182	cg15813460	5'UTR;5'UTR;1stExon;1stExon	C4orf44;C4orf44;C4orf44;C4orf44		island	NA
285	chr4	3250226	3251386	11	2.39001e-17	0.0699975	-0.147073	-0.0624182	cg16913361	TSS1500;TSS1500	C4orf44;C4orf44		shore	NA
285	chr4	3250226	3251386	11	2.39001e-17	0.0699975	-0.147073	-0.0624182	cg03108827	TSS1500;TSS1500	C4orf44;C4orf44		shore	NA
285	chr4	3250226	3251386	11	2.39001e-17	0.0699975	-0.147073	-0.0624182	cg21043481	TSS200;TSS200	C4orf44;C4orf44		island	NA
285	chr4	3250226	3251386	11	2.39001e-17	0.0699975	-0.147073	-0.0624182	cg17127235	TSS200;TSS200	C4orf44;C4orf44		island	NA
285	chr4	3250226	3251386	11	2.39001e-17	0.0699975	-0.147073	-0.0624182	cg05202136	5'UTR;5'UTR;1stExon;1stExon	C4orf44;C4orf44;C4orf44;C4orf44		island	NA
285	chr4	3250226	3251386	11	2.39001e-17	0.0699975	-0.147073	-0.0624182	cg13784474	1stExon;1stExon	C4orf44;C4orf44		island	V$TCF11MAFG_01;V$PAX2_01
285	chr4	3250226	3251386	11	2.39001e-17	0.0699975	-0.147073	-0.0624182	cg05733917	1stExon;1stExon	C4orf44;C4orf44		island	NA
285	chr4	3250226	3251386	11	2.39001e-17	0.0699975	-0.147073	-0.0624182	cg00420354	Body;Body	C4orf44;C4orf44		island	NA
286	chr10	415359	415489	3	3.64149e-11	0.0703499	-0.166702	-0.0965227	cg24131452	Body	DIP2C		shore	NA
286	chr10	415359	415489	3	3.64149e-11	0.0703499	-0.166702	-0.0965227	cg24136740	Body	DIP2C		shore	NA
286	chr10	415359	415489	3	3.64149e-11	0.0703499	-0.166702	-0.0965227	cg06920946	Body	DIP2C		shore	NA
287	chr2	74729710	74730948	13	1.55087e-21	0.0708412	0.09021	0.0238746	cg13921570	Body;TSS200	LOC151534;LBX2		island	NA
287	chr2	74729710	74730948	13	1.55087e-21	0.0708412	0.09021	0.0238746	cg01295339	Body;TSS200	LBX2;LOC151534		island	NA
287	chr2	74729710	74730948	13	1.55087e-21	0.0708412	0.09021	0.0238746	cg08490768	1stExon;Body;5'UTR	LBX2;LOC151534;LBX2		island	NA
287	chr2	74729710	74730948	13	1.55087e-21	0.0708412	0.09021	0.0238746	cg00573355	1stExon;Body;5'UTR	LBX2;LOC151534;LBX2		island	NA
287	chr2	74729710	74730948	13	1.55087e-21	0.0708412	0.09021	0.0238746	cg07515251	1stExon;Body;5'UTR	LBX2;LOC151534;LBX2		island	NA
287	chr2	74729710	74730948	13	1.55087e-21	0.0708412	0.09021	0.0238746	cg09011732	Body;TSS200	LOC151534;LBX2		island	NA
287	chr2	74729710	74730948	13	1.55087e-21	0.0708412	0.09021	0.0238746	cg02845591	Body;TSS200	LOC151534;LBX2		island	NA
287	chr2	74729710	74730948	13	1.55087e-21	0.0708412	0.09021	0.0238746	cg25503044	Body;TSS200	LOC151534;LBX2		island	NA
287	chr2	74729710	74730948	13	1.55087e-21	0.0708412	0.09021	0.0238746	cg22237735	Body;TSS200	LOC151534;LBX2		island	NA
287	chr2	74729710	74730948	13	1.55087e-21	0.0708412	0.09021	0.0238746	cg08193322	Body;TSS200	LOC151534;LBX2		island	NA
287	chr2	74729710	74730948	13	1.55087e-21	0.0708412	0.09021	0.0238746	cg05745223	Body;TSS200	LOC151534;LBX2		island	NA
287	chr2	74729710	74730948	13	1.55087e-21	0.0708412	0.09021	0.0238746	cg05490924	Body;TSS1500	LOC151534;LBX2		island	NA
287	chr2	74729710	74730948	13	1.55087e-21	0.0708412	0.09021	0.0238746	cg08984836	Body;TSS1500	LOC151534;LBX2		island	NA
288	chr16	67183003	67183725	3	3.19475e-14	0.071112	0.147574	-0.00700917	cg07224531	Body	B3GNT9		island	NA
288	chr16	67183003	67183725	3	3.19475e-14	0.071112	0.147574	-0.00700917	cg06889547	3'UTR	B3GNT9		shore	NA
288	chr16	67183003	67183725	3	3.19475e-14	0.071112	0.147574	-0.00700917	cg05333146	Body	B3GNT9		island	NA
289	chr1	16347984	16347995	2	5.2606e-11	0.0711854	-0.113397	-0.0791379	cg11528029	TSS1500;TSS1500	CLCNKA;CLCNKA	5hmC	open sea	NA
289	chr1	16347984	16347995	2	5.2606e-11	0.0711854	-0.113397	-0.0791379	cg16591681	TSS1500;TSS1500	CLCNKA;CLCNKA	5hmC	open sea	NA
290	chr2	636606	636937	2	3.17066e-16	0.0715467	-0.292839	-0.159926	cg14515364				island	NA
290	chr2	636606	636937	2	3.17066e-16	0.0715467	-0.292839	-0.159926	cg14636804				island	NA
291	chr16	1222028	1222188	2	8.30028e-10	0.0746028	-0.0895742	-0.05911	cg06232466	Body;Body	CACNA1H;CACNA1H		island	NA
291	chr16	1222028	1222188	2	8.30028e-10	0.0746028	-0.0895742	-0.05911	cg13866910	Body;Body	CACNA1H;CACNA1H		island	NA
292	chr11	46741299	46741405	3	1.10222e-10	0.0748465	-0.150811	-0.0680867	cg09004691	Body	F2	5hmC	open sea	NA
292	chr11	46741299	46741405	3	1.10222e-10	0.0748465	-0.150811	-0.0680867	cg13527922	Body	F2	5hmC	open sea	NA
293	chr7	157981945	157982427	4	6.95041e-11	0.0754879	-0.124704	-0.0970392	cg02078164	Body;Body;Body	PTPRN2;PTPRN2;PTPRN2		shore	NA
293	chr7	157981945	157982427	4	6.95041e-11	0.0754879	-0.124704	-0.0970392	cg19589728	Body;Body;Body	PTPRN2;PTPRN2;PTPRN2		shore	NA
293	chr7	157981945	157982427	4	6.95041e-11	0.0754879	-0.124704	-0.0970392	cg10231116	Body;Body;Body	PTPRN2;PTPRN2;PTPRN2		shore	NA
293	chr7	157981945	157982427	4	6.95041e-11	0.0754879	-0.124704	-0.0970392	cg27194152	Body;Body;Body	PTPRN2;PTPRN2;PTPRN2		shore	NA
294	chr1	168356537	168356606	3	2.94573e-13	0.0755958	-0.0433564	-0.0258189	cg10555800				open sea	V$RFX1_02
294	chr1	168356537	168356606	3	2.94573e-13	0.0755958	-0.0433564	-0.0258189	cg22695117				open sea	NA
294	chr1	168356537	168356606	3	2.94573e-13	0.0755958	-0.0433564	-0.0258189	cg20678082				open sea	NA
295	chr19	49109288	49109564	2	1.89392e-10	0.0774261	-0.186847	-0.066906	cg26555905	Body;TSS1500	FAM83E;SPACA4		shelf	NA
295	chr19	49109288	49109564	2	1.89392e-10	0.0774261	-0.186847	-0.066906	cg00754617	Body;TSS1500	FAM83E;SPACA4		shelf	NA
296	chr19	52005651	52005990	3	1.1299e-12	0.0790283	-0.0748039	-0.0471503	cg18986165	TSS1500	SIGLEC12		open sea	NA
296	chr19	52005651	52005990	3	1.1299e-12	0.0790283	-0.0748039	-0.0471503	cg14953197	TSS1500	SIGLEC12		open sea	NA
296	chr19	52005651	52005990	3	1.1299e-12	0.0790283	-0.0748039	-0.0471503	cg17872326	TSS1500	SIGLEC12		open sea	NA
297	chr4	25378308	25378980	6	3.00995e-16	0.0793458	-0.050649	-0.0184777	cg15863950	TSS200	ANAPC4		shore	NA
297	chr4	25378308	25378980	6	3.00995e-16	0.0793458	-0.050649	-0.0184777	cg13918811	TSS1500	ANAPC4		shore	NA
297	chr4	25378308	25378980	6	3.00995e-16	0.0793458	-0.050649	-0.0184777	cg00094256	TSS1500	ANAPC4		shore	NA
297	chr4	25378308	25378980	6	3.00995e-16	0.0793458	-0.050649	-0.0184777	cg02678013	TSS1500	ANAPC4		shore	NA
297	chr4	25378308	25378980	6	3.00995e-16	0.0793458	-0.050649	-0.0184777	cg22845362	5'UTR	ANAPC4		island	NA
297	chr4	25378308	25378980	6	3.00995e-16	0.0793458	-0.050649	-0.0184777	cg08684761	5'UTR	ANAPC4		island	NA
298	chr7	5633068	5633086	2	6.02892e-12	0.079422	-0.0158515	-0.0099145	cg18724565	1stExon	FSCN1		island	NA
298	chr7	5633068	5633086	2	6.02892e-12	0.079422	-0.0158515	-0.0099145	cg22447539	1stExon	FSCN1		island	NA
299	chr16	1363957	1365052	5	7.90122e-39	0.0798241	-0.282038	-0.123429	cg06703573	Body;Body;Body;Body	UBE2I;UBE2I;UBE2I;UBE2I	5hmC	island	NA
299	chr16	1363957	1365052	5	7.90122e-39	0.0798241	-0.282038	-0.123429	cg08626605	5'UTR;5'UTR;5'UTR;5'UTR	UBE2I;UBE2I;UBE2I;UBE2I	5hmC	island	NA
299	chr16	1363957	1365052	5	7.90122e-39	0.0798241	-0.282038	-0.123429	cg07511587	Body;Body;Body;Body	UBE2I;UBE2I;UBE2I;UBE2I	5hmC	island	NA
299	chr16	1363957	1365052	5	7.90122e-39	0.0798241	-0.282038	-0.123429	cg02920178	Body;Body;Body;Body	UBE2I;UBE2I;UBE2I;UBE2I	5hmC	shore	NA
299	chr16	1363957	1365052	5	7.90122e-39	0.0798241	-0.282038	-0.123429	cg01503184	Body;Body;Body;Body	UBE2I;UBE2I;UBE2I;UBE2I	5hmC	shore	NA
300	chr16	4659207	4659775	4	2.13214e-11	0.0810902	-0.264879	-0.112497	cg08819417	3'UTR	FAM100A		island	V$AREB6_01
300	chr16	4659207	4659775	4	2.13214e-11	0.0810902	-0.264879	-0.112497	cg04383436	3'UTR	FAM100A		shore	NA
300	chr16	4659207	4659775	4	2.13214e-11	0.0810902	-0.264879	-0.112497	cg05009047	3'UTR	FAM100A		island	NA
300	chr16	4659207	4659775	4	2.13214e-11	0.0810902	-0.264879	-0.112497	cg05660160	Body	FAM100A		shore	NA
301	chr2	233323532	233324053	5	7.33803e-13	0.082835	-0.158293	-0.0971845	cg26181818	3'UTR	ALPI		island	NA
301	chr2	233323532	233324053	5	7.33803e-13	0.082835	-0.158293	-0.0971845	cg12307638	Body	ALPI		island	NA
301	chr2	233323532	233324053	5	7.33803e-13	0.082835	-0.158293	-0.0971845	cg23238134	Body	ALPI		island	NA
301	chr2	233323532	233324053	5	7.33803e-13	0.082835	-0.158293	-0.0971845	cg22199969	Body	ALPI		island	NA
301	chr2	233323532	233324053	5	7.33803e-13	0.082835	-0.158293	-0.0971845	cg22094845	3'UTR	ALPI		shore	NA
302	chr4	183369754	183370059	2	3.04174e-10	0.084306	-0.0157288	-0.0112246	cg02422426	Body	ODZ3		island	NA
302	chr4	183369754	183370059	2	3.04174e-10	0.084306	-0.0157288	-0.0112246	cg19082230	Body	ODZ3		island	NA
303	chr15	91427184	91427848	5	7.59589e-16	0.0847786	0.103228	0.035035	cg09397246	TSS1500;TSS1500;TSS1500;TSS1500	FES;FES;FES;FES		shore	NA
303	chr15	91427184	91427848	5	7.59589e-16	0.0847786	0.103228	0.035035	cg25647583	TSS1500;TSS1500;TSS1500;TSS1500	FES;FES;FES;FES		shore	NA
303	chr15	91427184	91427848	5	7.59589e-16	0.0847786	0.103228	0.035035	cg26405020	TSS1500;TSS1500;TSS1500;TSS1500	FES;FES;FES;FES		shore	NA
303	chr15	91427184	91427848	5	7.59589e-16	0.0847786	0.103228	0.035035	cg03209642	TSS200;TSS1500;TSS1500;TSS200	FES;FES;FES;FES		island	NA
303	chr15	91427184	91427848	5	7.59589e-16	0.0847786	0.103228	0.035035	cg13947995	5'UTR;TSS1500;5'UTR;TSS1500	FES;FES;FES;FES		island	NA
303	chr15	91427184	91427848	5	7.59589e-16	0.0847786	0.103228	0.035035	cg05211768	5'UTR;TSS1500;5'UTR;TSS1500	FES;FES;FES;FES		island	NA
304	chr6	15244618	15244878	4	5.99483e-12	0.0847964	-0.109204	-0.0205246	cg12694224				shore	NA
304	chr6	15244618	15244878	4	5.99483e-12	0.0847964	-0.109204	-0.0205246	cg20892245				shore	NA
304	chr6	15244618	15244878	4	5.99483e-12	0.0847964	-0.109204	-0.0205246	cg04505252				shore	NA
304	chr6	15244618	15244878	4	5.99483e-12	0.0847964	-0.109204	-0.0205246	cg02043994				island	NA
305	chr10	130832336	130832393	2	1.48435e-18	0.0863911	-0.0746525	-0.0470116	cg15601164				open sea	NA
305	chr10	130832336	130832393	2	1.48435e-18	0.0863911	-0.0746525	-0.0470116	cg08881175				open sea	V$GATA1_03
306	chr20	36147327	36147549	3	5.7853e-12	0.0870936	-0.13345	-0.100716	cg11948874	Body;Body;Body;Body;Body	BLCAP;BLCAP;BLCAP;BLCAP;BLCAP		shore	V$FAC1_01
306	chr20	36147327	36147549	3	5.7853e-12	0.0870936	-0.13345	-0.100716	cg13591710	Body;Body;Body;Body;Body	BLCAP;BLCAP;BLCAP;BLCAP;BLCAP		shore	NA
306	chr20	36147327	36147549	3	5.7853e-12	0.0870936	-0.13345	-0.100716	cg11399589	Body;Body;Body;Body;Body	BLCAP;BLCAP;BLCAP;BLCAP;BLCAP		shore	NA
307	chr8	54934346	54934459	2	3.22481e-10	0.0882816	-0.0172114	-0.0138928	cg11008690	Body;Body	TCEA1;TCEA1		shore	NA
307	chr8	54934346	54934459	2	3.22481e-10	0.0882816	-0.0172114	-0.0138928	cg12737801	Body;Body	TCEA1;TCEA1		shore	NA
308	chr1	231155758	231156359	7	5.55089e-14	0.0890744	0.13423	0.00736562	cg01534125	TSS200;Body	MIR1182;FAM89A	BS	open sea	NA
308	chr1	231155758	231156359	7	5.55089e-14	0.0890744	0.13423	0.00736562	cg02464665	TSS1500;Body	MIR1182;FAM89A	BS	open sea	NA
308	chr1	231155758	231156359	7	5.55089e-14	0.0890744	0.13423	0.00736562	cg13652991	TSS200;Body	MIR1182;FAM89A	BS	open sea	NA
308	chr1	231155758	231156359	7	5.55089e-14	0.0890744	0.13423	0.00736562	cg01569295	TSS200;Body	MIR1182;FAM89A	BS	open sea	NA
308	chr1	231155758	231156359	7	5.55089e-14	0.0890744	0.13423	0.00736562	cg20821842	TSS1500;Body	MIR1182;FAM89A	BS	open sea	NA
308	chr1	231155758	231156359	7	5.55089e-14	0.0890744	0.13423	0.00736562	cg08473764	TSS1500;Body	MIR1182;FAM89A	BS	open sea	NA
308	chr1	231155758	231156359	7	5.55089e-14	0.0890744	0.13423	0.00736562	cg26614229	TSS1500;Body	MIR1182;FAM89A	BS	open sea	NA
309	chr1	44715942	44716296	5	3.51938e-12	0.0893979	-0.213453	-0.106813	cg24373865	Body	ERI3		open sea	NA
309	chr1	44715942	44716296	5	3.51938e-12	0.0893979	-0.213453	-0.106813	cg26349416	Body	ERI3		open sea	NA
309	chr1	44715942	44716296	5	3.51938e-12	0.0893979	-0.213453	-0.106813	cg01782059	Body	ERI3		open sea	NA
309	chr1	44715942	44716296	5	3.51938e-12	0.0893979	-0.213453	-0.106813	cg12643917	Body	ERI3		open sea	NA
309	chr1	44715942	44716296	5	3.51938e-12	0.0893979	-0.213453	-0.106813	cg16710124	Body	ERI3		open sea	NA
310	chr1	44031756	44031826	2	1.87064e-12	0.0908548	-0.0184538	-0.0126932	cg22875872	Body;Body	PTPRF;PTPRF		island	NA
310	chr1	44031756	44031826	2	1.87064e-12	0.0908548	-0.0184538	-0.0126932	cg10881128	Body;Body	PTPRF;PTPRF		island	NA
311	chr12	131002792	131002918	2	1.43078e-10	0.0932091	-0.116403	-0.0767478	cg24272907	TSS1500	RIMBP2		open sea	NA
311	chr12	131002792	131002918	2	1.43078e-10	0.0932091	-0.116403	-0.0767478	cg04227871	TSS1500	RIMBP2		open sea	NA
312	chr17	3867014	3867227	3	6.99956e-16	0.0933187	-0.0431499	-0.0150546	cg12120292	Body;Body;Body;Body;Body;Body;Body	ATP2A3;ATP2A3;ATP2A3;ATP2A3;ATP2A3;ATP2A3;ATP2A3		island	NA
312	chr17	3867014	3867227	3	6.99956e-16	0.0933187	-0.0431499	-0.0150546	cg15443822	Body;Body;Body;Body;Body;Body;Body	ATP2A3;ATP2A3;ATP2A3;ATP2A3;ATP2A3;ATP2A3;ATP2A3		shore	NA
312	chr17	3867014	3867227	3	6.99956e-16	0.0933187	-0.0431499	-0.0150546	cg19290504	Body;Body;Body;Body;Body;Body;Body	ATP2A3;ATP2A3;ATP2A3;ATP2A3;ATP2A3;ATP2A3;ATP2A3		island	NA
313	chr4	3643404	3643475	2	2.34544e-10	0.0937891	-0.0945566	-0.0635413	cg02784202			5hmC	shore	NA
313	chr4	3643404	3643475	2	2.34544e-10	0.0937891	-0.0945566	-0.0635413	cg21441657			5hmC	shore	NA
314	chr4	3487164	3487436	3	1.49734e-13	0.0943757	0.220135	0.123179	cg15652666	Body;Body	DOK7;DOK7		shore	NA
314	chr4	3487164	3487436	3	1.49734e-13	0.0943757	0.220135	0.123179	cg14480249	Body;Body	DOK7;DOK7		shore	NA
314	chr4	3487164	3487436	3	1.49734e-13	0.0943757	0.220135	0.123179	cg15543045	Body;Body	DOK7;DOK7		shore	V$TAXCREB_02
315	chr2	203036093	203036235	4	4.93097e-15	0.0954308	0.0615373	0.0276544	cg09287629				island	NA
315	chr2	203036093	203036235	4	4.93097e-15	0.0954308	0.0615373	0.0276544	cg25121292				island	NA
315	chr2	203036093	203036235	4	4.93097e-15	0.0954308	0.0615373	0.0276544	cg08621447				island	NA
315	chr2	203036093	203036235	4	4.93097e-15	0.0954308	0.0615373	0.0276544	cg10089801				island	NA
316	chr11	393938	394289	4	2.57345e-10	0.096184	0.100772	0.02952	cg09671481	1stExon;5'UTR	PKP3;PKP3		island	NA
316	chr11	393938	394289	4	2.57345e-10	0.096184	0.100772	0.02952	cg05214427	TSS1500	PKP3		shore	NA
316	chr11	393938	394289	4	2.57345e-10	0.096184	0.100772	0.02952	cg08314660	TSS200	PKP3		shore	NA
316	chr11	393938	394289	4	2.57345e-10	0.096184	0.100772	0.02952	cg18011064	1stExon;5'UTR	PKP3;PKP3		island	NA
317	chr2	63274615	63275178	6	2.84502e-13	0.0992743	0.0695428	0.0474167	cg15402210	TSS200	LOC100132215		island	NA
317	chr2	63274615	63275178	6	2.84502e-13	0.0992743	0.0695428	0.0474167	cg15732840	Body	LOC100132215		island	NA
317	chr2	63274615	63275178	6	2.84502e-13	0.0992743	0.0695428	0.0474167	cg19177627	Body	LOC100132215		island	NA
317	chr2	63274615	63275178	6	2.84502e-13	0.0992743	0.0695428	0.0474167	cg17583946	TSS200	LOC100132215		island	NA
317	chr2	63274615	63275178	6	2.84502e-13	0.0992743	0.0695428	0.0474167	cg20585676	TSS200	LOC100132215		island	NA
317	chr2	63274615	63275178	6	2.84502e-13	0.0992743	0.0695428	0.0474167	cg01156077	TSS1500	LOC100132215		island	NA
318	chr20	19866743	19866974	4	1.51173e-10	0.100439	0.160698	0.087757	cg09219364				open sea	NA
318	chr20	19866743	19866974	4	1.51173e-10	0.100439	0.160698	0.087757	cg09110922				open sea	NA
318	chr20	19866743	19866974	4	1.51173e-10	0.100439	0.160698	0.087757	cg23501964				open sea	NA
318	chr20	19866743	19866974	4	1.51173e-10	0.100439	0.160698	0.087757	cg13396318				open sea	V$MYOGNF1_01
319	chr17	79283738	79283959	3	8.47891e-13	0.100916	0.200516	0.0664077	cg20275928	TSS1500	C17orf55		island	NA
319	chr17	79283738	79283959	3	8.47891e-13	0.100916	0.200516	0.0664077	cg07070113	TSS1500	C17orf55		shore	NA
319	chr17	79283738	79283959	3	8.47891e-13	0.100916	0.200516	0.0664077	cg23989336	TSS1500	C17orf55		island	NA
320	chr11	2356706	2356948	2	2.49045e-56	0.102738	-0.200785	-0.099674	cg10738865			5hmC	open sea	NA
320	chr11	2356706	2356948	2	2.49045e-56	0.102738	-0.200785	-0.099674	cg26688678			5hmC	open sea	NA
321	chr1	210000258	210000559	2	7.33214e-14	0.103919	-0.115407	-0.0750853	cg03753785	TSS1500	C1orf107		shore	NA
321	chr1	210000258	210000559	2	7.33214e-14	0.103919	-0.115407	-0.0750853	cg04238303	TSS1500	C1orf107		shore	NA
322	chr13	113105897	113106473	6	2.28974e-17	0.105824	-0.116912	-0.0892378	cg05285677				shore	NA
322	chr13	113105897	113106473	6	2.28974e-17	0.105824	-0.116912	-0.0892378	cg04190037				shore	NA
322	chr13	113105897	113106473	6	2.28974e-17	0.105824	-0.116912	-0.0892378	cg04563693				shore	NA
322	chr13	113105897	113106473	6	2.28974e-17	0.105824	-0.116912	-0.0892378	cg22318170				island	NA
322	chr13	113105897	113106473	6	2.28974e-17	0.105824	-0.116912	-0.0892378	cg10167785				island	NA
322	chr13	113105897	113106473	6	2.28974e-17	0.105824	-0.116912	-0.0892378	cg12939648				island	NA
323	chr7	155579788	155580322	5	1.02794e-19	0.105873	0.105331	0.0366073	cg11706177				shore	NA
323	chr7	155579788	155580322	5	1.02794e-19	0.105873	0.105331	0.0366073	cg00608299				shore	NA
323	chr7	155579788	155580322	5	1.02794e-19	0.105873	0.105331	0.0366073	cg05470643				shore	NA
323	chr7	155579788	155580322	5	1.02794e-19	0.105873	0.105331	0.0366073	cg10684547				island	NA
323	chr7	155579788	155580322	5	1.02794e-19	0.105873	0.105331	0.0366073	cg10602282				island	NA
324	chr22	43505892	43506505	18	1.99566e-12	0.106094	0.0872543	0.00437125	cg09263116	TSS1500	BIK		shore	NA
324	chr22	43505892	43506505	18	1.99566e-12	0.106094	0.0872543	0.00437125	cg01341487	TSS1500	BIK		island	NA
324	chr22	43505892	43506505	18	1.99566e-12	0.106094	0.0872543	0.00437125	cg26453588	TSS1500	BIK		island	NA
324	chr22	43505892	43506505	18	1.99566e-12	0.106094	0.0872543	0.00437125	cg04042468	TSS1500	BIK		island	NA
324	chr22	43505892	43506505	18	1.99566e-12	0.106094	0.0872543	0.00437125	cg17967224	TSS1500	BIK		shore	NA
324	chr22	43505892	43506505	18	1.99566e-12	0.106094	0.0872543	0.00437125	cg20662856	TSS1500	BIK		shore	NA
324	chr22	43505892	43506505	18	1.99566e-12	0.106094	0.0872543	0.00437125	cg08954856	TSS1500	BIK		shore	NA
324	chr22	43505892	43506505	18	1.99566e-12	0.106094	0.0872543	0.00437125	cg20550677	TSS1500	BIK		shore	NA
324	chr22	43505892	43506505	18	1.99566e-12	0.106094	0.0872543	0.00437125	cg10513709	TSS1500	BIK		shore	NA
324	chr22	43505892	43506505	18	1.99566e-12	0.106094	0.0872543	0.00437125	cg07972488	TSS1500	BIK		shore	NA
324	chr22	43505892	43506505	18	1.99566e-12	0.106094	0.0872543	0.00437125	cg04496246	TSS1500	BIK		shore	NA
324	chr22	43505892	43506505	18	1.99566e-12	0.106094	0.0872543	0.00437125	cg06787487	TSS1500	BIK		shore	NA
324	chr22	43505892	43506505	18	1.99566e-12	0.106094	0.0872543	0.00437125	cg11929629	TSS1500	BIK		shore	NA
324	chr22	43505892	43506505	18	1.99566e-12	0.106094	0.0872543	0.00437125	cg13504714	TSS1500	BIK		shore	NA
324	chr22	43505892	43506505	18	1.99566e-12	0.106094	0.0872543	0.00437125	cg18191200	TSS1500	BIK		shore	NA
324	chr22	43505892	43506505	18	1.99566e-12	0.106094	0.0872543	0.00437125	cg08411536	TSS1500	BIK		shore	NA
324	chr22	43505892	43506505	18	1.99566e-12	0.106094	0.0872543	0.00437125	cg08205110	TSS1500	BIK		shore	NA
324	chr22	43505892	43506505	18	1.99566e-12	0.106094	0.0872543	0.00437125	cg08129374	TSS1500	BIK		island	NA
325	chr7	130131359	130132790	35	4.68993e-21	0.107727	-0.0784699	-0.0339334	cg01784351	5'UTR;5'UTR;TSS1500;Body	MEST;MEST;MESTIT1;MEST		island	NA
325	chr7	130131359	130132790	35	4.68993e-21	0.107727	-0.0784699	-0.0339334	cg21667116	TSS1500;5'UTR;5'UTR;TSS1500	MEST;MEST;MEST;MESTIT1		island	NA
325	chr7	130131359	130132790	35	4.68993e-21	0.107727	-0.0784699	-0.0339334	cg23156962	TSS1500;5'UTR;5'UTR;TSS1500	MEST;MEST;MEST;MESTIT1		island	NA
325	chr7	130131359	130132790	35	4.68993e-21	0.107727	-0.0784699	-0.0339334	cg04678950	TSS1500;5'UTR;5'UTR;TSS1500	MEST;MEST;MEST;MESTIT1		island	NA
325	chr7	130131359	130132790	35	4.68993e-21	0.107727	-0.0784699	-0.0339334	cg17079325	TSS1500;5'UTR;5'UTR;TSS1500	MEST;MEST;MEST;MESTIT1		island	NA
325	chr7	130131359	130132790	35	4.68993e-21	0.107727	-0.0784699	-0.0339334	cg04344875	TSS1500;5'UTR;5'UTR;TSS1500	MEST;MEST;MEST;MESTIT1		island	NA
325	chr7	130131359	130132790	35	4.68993e-21	0.107727	-0.0784699	-0.0339334	cg18934293	TSS1500;5'UTR;5'UTR;TSS1500	MEST;MEST;MEST;MESTIT1		island	NA
325	chr7	130131359	130132790	35	4.68993e-21	0.107727	-0.0784699	-0.0339334	cg00286878	TSS1500;5'UTR;5'UTR;TSS1500	MEST;MEST;MEST;MESTIT1		island	NA
325	chr7	130131359	130132790	35	4.68993e-21	0.107727	-0.0784699	-0.0339334	cg12347392	TSS1500;5'UTR;5'UTR;TSS1500	MEST;MEST;MEST;MESTIT1		island	NA
325	chr7	130131359	130132790	35	4.68993e-21	0.107727	-0.0784699	-0.0339334	cg04786207	TSS1500;5'UTR;5'UTR;TSS1500	MEST;MEST;MEST;MESTIT1		island	NA
325	chr7	130131359	130132790	35	4.68993e-21	0.107727	-0.0784699	-0.0339334	cg19386484	TSS1500;5'UTR;5'UTR;TSS1500	MEST;MEST;MEST;MESTIT1		island	NA
325	chr7	130131359	130132790	35	4.68993e-21	0.107727	-0.0784699	-0.0339334	cg26708559	TSS1500;5'UTR;5'UTR;TSS1500	MEST;MEST;MEST;MESTIT1		island	NA
325	chr7	130131359	130132790	35	4.68993e-21	0.107727	-0.0784699	-0.0339334	cg22705386	5'UTR;TSS200;5'UTR;TSS1500	MEST;MEST;MEST;MESTIT1		island	NA
325	chr7	130131359	130132790	35	4.68993e-21	0.107727	-0.0784699	-0.0339334	cg06212135	5'UTR;TSS200;5'UTR;TSS1500	MEST;MEST;MEST;MESTIT1		island	NA
325	chr7	130131359	130132790	35	4.68993e-21	0.107727	-0.0784699	-0.0339334	cg10249538	5'UTR;TSS200;5'UTR;TSS1500	MEST;MEST;MEST;MESTIT1		island	NA
325	chr7	130131359	130132790	35	4.68993e-21	0.107727	-0.0784699	-0.0339334	cg16823958	5'UTR;TSS200;5'UTR;TSS1500	MEST;MEST;MEST;MESTIT1		island	NA
325	chr7	130131359	130132790	35	4.68993e-21	0.107727	-0.0784699	-0.0339334	cg27338480	5'UTR;TSS200;5'UTR;TSS1500	MEST;MEST;MEST;MESTIT1		island	NA
325	chr7	130131359	130132790	35	4.68993e-21	0.107727	-0.0784699	-0.0339334	cg09080913	5'UTR;TSS200;5'UTR;TSS1500	MEST;MEST;MEST;MESTIT1		island	NA
325	chr7	130131359	130132790	35	4.68993e-21	0.107727	-0.0784699	-0.0339334	cg13104298	5'UTR;TSS200;5'UTR;TSS1500	MEST;MEST;MEST;MESTIT1		island	NA
325	chr7	130131359	130132790	35	4.68993e-21	0.107727	-0.0784699	-0.0339334	cg21629528	5'UTR;TSS200;5'UTR;TSS1500	MEST;MEST;MEST;MESTIT1		island	NA
325	chr7	130131359	130132790	35	4.68993e-21	0.107727	-0.0784699	-0.0339334	cg20050761	5'UTR;TSS200;5'UTR;TSS1500	MEST;MEST;MEST;MESTIT1		island	NA
325	chr7	130131359	130132790	35	4.68993e-21	0.107727	-0.0784699	-0.0339334	cg07870293	5'UTR;TSS200;5'UTR;TSS1500	MEST;MEST;MEST;MESTIT1		island	NA
325	chr7	130131359	130132790	35	4.68993e-21	0.107727	-0.0784699	-0.0339334	cg05556276	5'UTR;1stExon;5'UTR;TSS1500	MEST;MEST;MEST;MESTIT1		island	NA
325	chr7	130131359	130132790	35	4.68993e-21	0.107727	-0.0784699	-0.0339334	cg17580798	5'UTR;5'UTR;TSS1500;Body	MEST;MEST;MESTIT1;MEST		island	NA
325	chr7	130131359	130132790	35	4.68993e-21	0.107727	-0.0784699	-0.0339334	cg05862114	5'UTR;5'UTR;TSS1500;Body	MEST;MEST;MESTIT1;MEST		island	NA
325	chr7	130131359	130132790	35	4.68993e-21	0.107727	-0.0784699	-0.0339334	cg27589003	5'UTR;5'UTR;TSS1500;Body	MEST;MEST;MESTIT1;MEST		island	NA
325	chr7	130131359	130132790	35	4.68993e-21	0.107727	-0.0784699	-0.0339334	cg19344806	5'UTR;5'UTR;TSS1500;Body	MEST;MEST;MESTIT1;MEST		island	NA
325	chr7	130131359	130132790	35	4.68993e-21	0.107727	-0.0784699	-0.0339334	cg23714917	5'UTR;5'UTR;TSS1500;Body	MEST;MEST;MESTIT1;MEST		island	NA
325	chr7	130131359	130132790	35	4.68993e-21	0.107727	-0.0784699	-0.0339334	cg21200654	5'UTR;5'UTR;TSS1500;Body	MEST;MEST;MESTIT1;MEST		island	NA
325	chr7	130131359	130132790	35	4.68993e-21	0.107727	-0.0784699	-0.0339334	cg25519926	5'UTR;5'UTR;TSS1500;Body	MEST;MEST;MESTIT1;MEST		island	NA
325	chr7	130131359	130132790	35	4.68993e-21	0.107727	-0.0784699	-0.0339334	cg09462536	5'UTR;5'UTR;TSS1500;Body	MEST;MEST;MESTIT1;MEST		island	NA
325	chr7	130131359	130132790	35	4.68993e-21	0.107727	-0.0784699	-0.0339334	cg22592140	5'UTR;5'UTR;TSS1500;Body	MEST;MEST;MESTIT1;MEST		island	NA
325	chr7	130131359	130132790	35	4.68993e-21	0.107727	-0.0784699	-0.0339334	cg03588221	5'UTR;5'UTR;TSS1500;Body	MEST;MEST;MESTIT1;MEST		island	NA
325	chr7	130131359	130132790	35	4.68993e-21	0.107727	-0.0784699	-0.0339334	cg13986840	5'UTR;5'UTR;TSS1500;Body	MEST;MEST;MESTIT1;MEST		island	NA
325	chr7	130131359	130132790	35	4.68993e-21	0.107727	-0.0784699	-0.0339334	cg14952237	5'UTR;5'UTR;Body	MEST;MEST;MEST		island	NA
326	chr3	46734995	46735338	8	1.30389e-11	0.108325	-0.027774	-0.0104849	cg04990724	1stExon;5'UTR	ALS2CL;ALS2CL		island	NA
326	chr3	46734995	46735338	8	1.30389e-11	0.108325	-0.027774	-0.0104849	cg11816841	5'UTR	ALS2CL		island	NA
326	chr3	46734995	46735338	8	1.30389e-11	0.108325	-0.027774	-0.0104849	cg05369142	5'UTR	ALS2CL		island	NA
326	chr3	46734995	46735338	8	1.30389e-11	0.108325	-0.027774	-0.0104849	cg23444101	1stExon;5'UTR	ALS2CL;ALS2CL		island	NA
326	chr3	46734995	46735338	8	1.30389e-11	0.108325	-0.027774	-0.0104849	cg03270929	TSS200	ALS2CL		island	NA
326	chr3	46734995	46735338	8	1.30389e-11	0.108325	-0.027774	-0.0104849	cg07279281	TSS200	ALS2CL		island	NA
326	chr3	46734995	46735338	8	1.30389e-11	0.108325	-0.027774	-0.0104849	cg19455322	TSS200	ALS2CL		island	NA
326	chr3	46734995	46735338	8	1.30389e-11	0.108325	-0.027774	-0.0104849	cg21379004	TSS200	ALS2CL		island	NA
327	chr1	22207011	22207207	2	1.73498e-10	0.112115	-0.202558	-0.116437	cg13940218	Body	HSPG2		shelf	NA
327	chr1	22207011	22207207	2	1.73498e-10	0.112115	-0.202558	-0.116437	cg02956660	Body	HSPG2		shelf	NA
328	chr15	79724517	79724802	6	1.44274e-10	0.11227	-0.0117094	-0.0085692	cg00462168	TSS200	KIAA1024		island	NA
328	chr15	79724517	79724802	6	1.44274e-10	0.11227	-0.0117094	-0.0085692	cg11821817	TSS1500	KIAA1024		island	NA
328	chr15	79724517	79724802	6	1.44274e-10	0.11227	-0.0117094	-0.0085692	cg05804863	TSS1500	KIAA1024		island	NA
328	chr15	79724517	79724802	6	1.44274e-10	0.11227	-0.0117094	-0.0085692	cg22963554	TSS200	KIAA1024		island	NA
328	chr15	79724517	79724802	6	1.44274e-10	0.11227	-0.0117094	-0.0085692	cg15431821	TSS200	KIAA1024		island	NA
328	chr15	79724517	79724802	6	1.44274e-10	0.11227	-0.0117094	-0.0085692	cg00544449	TSS200	KIAA1024		island	NA
329	chr17	80545454	80545869	5	8.77017e-12	0.112618	-0.171321	-0.0836498	cg04381393	Body	FOXK2		island	NA
329	chr17	80545454	80545869	5	8.77017e-12	0.112618	-0.171321	-0.0836498	cg07539709	Body	FOXK2		island	NA
329	chr17	80545454	80545869	5	8.77017e-12	0.112618	-0.171321	-0.0836498	cg04800768	Body	FOXK2		island	NA
329	chr17	80545454	80545869	5	8.77017e-12	0.112618	-0.171321	-0.0836498	cg24537348	Body	FOXK2		shore	NA
329	chr17	80545454	80545869	5	8.77017e-12	0.112618	-0.171321	-0.0836498	cg21842914	Body	FOXK2		shore	NA
330	chr8	143868530	143869473	9	9.80056e-13	0.112783	-0.142661	-0.0716883	cg14031465	TSS1500	LY6D	5hmC	open sea	NA
330	chr8	143868530	143869473	9	9.80056e-13	0.112783	-0.142661	-0.0716883	cg26466375	TSS1500	LY6D	5hmC	open sea	NA
330	chr8	143868530	143869473	9	9.80056e-13	0.112783	-0.142661	-0.0716883	cg02918648	TSS1500	LY6D	5hmC	open sea	NA
330	chr8	143868530	143869473	9	9.80056e-13	0.112783	-0.142661	-0.0716883	cg17080283	TSS1500	LY6D	5hmC	open sea	NA
330	chr8	143868530	143869473	9	9.80056e-13	0.112783	-0.142661	-0.0716883	cg02679028	TSS1500	LY6D	5hmC	open sea	NA
330	chr8	143868530	143869473	9	9.80056e-13	0.112783	-0.142661	-0.0716883	cg02926397	TSS1500	LY6D	5hmC	open sea	NA
330	chr8	143868530	143869473	9	9.80056e-13	0.112783	-0.142661	-0.0716883	cg23436058	TSS1500	LY6D	5hmC	open sea	NA
330	chr8	143868530	143869473	9	9.80056e-13	0.112783	-0.142661	-0.0716883	cg26042490	TSS1500	LY6D	5hmC	open sea	NA
330	chr8	143868530	143869473	9	9.80056e-13	0.112783	-0.142661	-0.0716883	cg01054454	TSS1500	LY6D	5hmC	open sea	NA
331	chr13	111365570	111366565	7	4.05887e-17	0.113864	-0.0263931	-0.00872436	cg20524211	Body;1stExon;5'UTR;TSS1500;5'UTR	ING1;ING1;ING1;ING1;ING1		island	NA
331	chr13	111365570	111366565	7	4.05887e-17	0.113864	-0.0263931	-0.00872436	cg01834010	Body;TSS200;TSS200	ING1;ING1;ING1		island	V$TATA_01
331	chr13	111365570	111366565	7	4.05887e-17	0.113864	-0.0263931	-0.00872436	cg24331049	Body;TSS200;TSS200	ING1;ING1;ING1		island	NA
331	chr13	111365570	111366565	7	4.05887e-17	0.113864	-0.0263931	-0.00872436	cg25989856	Body;1stExon;5'UTR;1stExon;5'UTR	ING1;ING1;ING1;ING1;ING1		island	NA
331	chr13	111365570	111366565	7	4.05887e-17	0.113864	-0.0263931	-0.00872436	cg05867960	Body;1stExon;5'UTR;TSS1500;5'UTR	ING1;ING1;ING1;ING1;ING1		island	NA
331	chr13	111365570	111366565	7	4.05887e-17	0.113864	-0.0263931	-0.00872436	cg02570593	Body;1stExon;5'UTR;TSS1500;5'UTR	ING1;ING1;ING1;ING1;ING1		island	NA
331	chr13	111365570	111366565	7	4.05887e-17	0.113864	-0.0263931	-0.00872436	cg04528024	Body;1stExon;TSS1500;5'UTR	ING1;ING1;ING1;ING1		island	NA
332	chr7	100809451	100809507	2	2.88224e-10	0.114615	-0.0291349	-0.0163502	cg16566171	TSS1500	VGF		shore	NA
332	chr7	100809451	100809507	2	2.88224e-10	0.114615	-0.0291349	-0.0163502	cg05225187	TSS1500	VGF		shore	NA
333	chr19	1580400	1581001	5	2.94976e-15	0.11598	-0.169568	-0.0821956	cg25435465	Body	MBD3	5hmC	island	NA
333	chr19	1580400	1581001	5	2.94976e-15	0.11598	-0.169568	-0.0821956	cg00402516	Body	MBD3	5hmC	island	NA
333	chr19	1580400	1581001	5	2.94976e-15	0.11598	-0.169568	-0.0821956	cg08506306	Body	MBD3	5hmC	island	NA
333	chr19	1580400	1581001	5	2.94976e-15	0.11598	-0.169568	-0.0821956	cg04446467	Body	MBD3	5hmC	island	NA
333	chr19	1580400	1581001	5	2.94976e-15	0.11598	-0.169568	-0.0821956	cg08599699	Body	MBD3		shore	NA
334	chr3	196367487	196367555	2	2.17357e-11	0.117378	-0.0925535	-0.0630231	cg06690168	5'UTR	LRRC33		shore	NA
334	chr3	196367487	196367555	2	2.17357e-11	0.117378	-0.0925535	-0.0630231	cg07700837	5'UTR	LRRC33		shore	NA
335	chr1	111768837	111769481	4	4.38447e-13	0.118315	-0.101293	-0.0664895	cg09516523	TSS1500;TSS1500	CHI3L2;CHI3L2		open sea	NA
335	chr1	111768837	111769481	4	4.38447e-13	0.118315	-0.101293	-0.0664895	cg09474476	TSS1500;TSS1500	CHI3L2;CHI3L2		open sea	NA
335	chr1	111768837	111769481	4	4.38447e-13	0.118315	-0.101293	-0.0664895	cg02590572	TSS1500;TSS1500	CHI3L2;CHI3L2		open sea	NA
336	chr16	88949367	88949636	2	3.10575e-13	0.12105	-0.170586	-0.0957406	cg02216032	Body;Body	CBFA2T3;CBFA2T3	5hmC	shore	NA
336	chr16	88949367	88949636	2	3.10575e-13	0.12105	-0.170586	-0.0957406	cg00402956	Body;Body	CBFA2T3;CBFA2T3	5hmC	shore	NA
337	chr16	1574269	1574590	2	5.17092e-16	0.121229	-0.148514	-0.063284	cg27503499	Body	IFT140	5hmC	shore	NA
337	chr16	1574269	1574590	2	5.17092e-16	0.121229	-0.148514	-0.063284	cg00374546	Body	IFT140	5hmC	island	NA
338	chr16	1267474	1267876	3	9.48871e-14	0.121369	-0.134659	-0.0638257	cg03386791	Body;Body	CACNA1H;CACNA1H		shore	NA
338	chr16	1267474	1267876	3	9.48871e-14	0.121369	-0.134659	-0.0638257	cg08353479	Body;Body	CACNA1H;CACNA1H		shore	NA
338	chr16	1267474	1267876	3	9.48871e-14	0.121369	-0.134659	-0.0638257	cg05364651	Body;Body	CACNA1H;CACNA1H		island	NA
339	chr17	79253888	79254595	6	4.04015e-22	0.122048	-0.199282	-0.0696156	cg19760249	Body;Body	SLC38A10;SLC38A10		island	NA
339	chr17	79253888	79254595	6	4.04015e-22	0.122048	-0.199282	-0.0696156	cg15009525	Body;Body	SLC38A10;SLC38A10		shore	NA
339	chr17	79253888	79254595	6	4.04015e-22	0.122048	-0.199282	-0.0696156	cg04512184	Body;Body	SLC38A10;SLC38A10		shore	NA
339	chr17	79253888	79254595	6	4.04015e-22	0.122048	-0.199282	-0.0696156	cg02632583	Body;Body	SLC38A10;SLC38A10		shore	NA
339	chr17	79253888	79254595	6	4.04015e-22	0.122048	-0.199282	-0.0696156	cg23792115	Body;Body	SLC38A10;SLC38A10		shore	NA
339	chr17	79253888	79254595	6	4.04015e-22	0.122048	-0.199282	-0.0696156	cg25405238	Body;Body	SLC38A10;SLC38A10		island	NA
340	chr17	73727435	73728061	6	2.85359e-29	0.122325	-0.170149	-0.0615227	cg27029445	Body;Body;Body	ITGB4;ITGB4;ITGB4	5hmC	shore	NA
340	chr17	73727435	73728061	6	2.85359e-29	0.122325	-0.170149	-0.0615227	cg20942310	Body;Body;Body	ITGB4;ITGB4;ITGB4	5hmC	shore	NA
340	chr17	73727435	73728061	6	2.85359e-29	0.122325	-0.170149	-0.0615227	cg19159842	Body;Body;Body	ITGB4;ITGB4;ITGB4	5hmC	shore	V$SPZ1_01
340	chr17	73727435	73728061	6	2.85359e-29	0.122325	-0.170149	-0.0615227	cg14601050	Body;Body;Body	ITGB4;ITGB4;ITGB4	5hmC	shore	NA
340	chr17	73727435	73728061	6	2.85359e-29	0.122325	-0.170149	-0.0615227	cg24037380	Body;Body;Body	ITGB4;ITGB4;ITGB4	5hmC	shore	NA
340	chr17	73727435	73728061	6	2.85359e-29	0.122325	-0.170149	-0.0615227	cg26314765	Body;Body;Body	ITGB4;ITGB4;ITGB4	5hmC	shore	NA
341	chr22	38823479	38823897	2	2.76691e-17	0.122776	-0.146971	-0.0893527	cg13861677	Body;Body	KCNJ4;KCNJ4		island	NA
341	chr22	38823479	38823897	2	2.76691e-17	0.122776	-0.146971	-0.0893527	cg26674301	Body;Body	KCNJ4;KCNJ4		island	NA
342	chr14	101349736	101351026	10	2.42156e-18	0.123092	-0.170848	-0.0640526	cg18141891	TSS1500;1stExon;TSS200	MIR136;RTL1;MIR432	5hmC	shore	NA
342	chr14	101349736	101351026	10	2.42156e-18	0.123092	-0.170848	-0.0640526	cg23377000	TSS1500;1stExon;TSS200	MIR136;RTL1;MIR432	5hmC	shore	NA
342	chr14	101349736	101351026	10	2.42156e-18	0.123092	-0.170848	-0.0640526	cg05371620	TSS1500;TSS1500;1stExon	MIR432;MIR136;RTL1	5hmC	shore	NA
342	chr14	101349736	101351026	10	2.42156e-18	0.123092	-0.170848	-0.0640526	cg23682215	TSS1500;1stExon;TSS200	MIR136;RTL1;MIR432	5hmC	shore	NA
342	chr14	101349736	101351026	10	2.42156e-18	0.123092	-0.170848	-0.0640526	cg26254637	TSS1500;1stExon;TSS200	MIR136;RTL1;MIR432	5hmC	shore	NA
342	chr14	101349736	101351026	10	2.42156e-18	0.123092	-0.170848	-0.0640526	cg18947995	TSS1500;1stExon;TSS200	MIR136;RTL1;MIR432	5hmC	shore	NA
342	chr14	101349736	101351026	10	2.42156e-18	0.123092	-0.170848	-0.0640526	cg02344891	TSS200;1stExon;Body	MIR136;RTL1;MIR432	5hmC	shore	NA
342	chr14	101349736	101351026	10	2.42156e-18	0.123092	-0.170848	-0.0640526	cg04699566	TSS200;1stExon	MIR136;RTL1	5hmC	shore	NA
342	chr14	101349736	101351026	10	2.42156e-18	0.123092	-0.170848	-0.0640526	cg19603885	TSS1500;TSS1500;1stExon	MIR432;MIR136;RTL1		island	NA
342	chr14	101349736	101351026	10	2.42156e-18	0.123092	-0.170848	-0.0640526	cg27267198	TSS1500;TSS1500;1stExon	MIR432;MIR136;RTL1		shore	NA
343	chr17	74387481	74387581	2	7.40795e-11	0.123765	-0.139416	-0.0880359	cg22443975	Body	UBE2O		open sea	NA
343	chr17	74387481	74387581	2	7.40795e-11	0.123765	-0.139416	-0.0880359	cg17907739	Body	UBE2O		open sea	NA
344	chr2	239974554	239974723	3	1.00058e-11	0.12604	-0.216544	-0.131686	cg18930444	3'UTR	HDAC4		island	NA
344	chr2	239974554	239974723	3	1.00058e-11	0.12604	-0.216544	-0.131686	cg12011198	3'UTR	HDAC4		island	NA
345	chr8	55047904	55048378	3	9.00303e-11	0.128844	-0.0222333	-0.00623501	cg09895187	Body	MRPL15		island	NA
345	chr8	55047904	55048378	3	9.00303e-11	0.128844	-0.0222333	-0.00623501	cg16129797	1stExon	MRPL15		island	NA
345	chr8	55047904	55048378	3	9.00303e-11	0.128844	-0.0222333	-0.00623501	cg16773294	Body	MRPL15		shore	NA
346	chr3	108836693	108837620	12	2.76254e-16	0.129676	-0.198829	-0.0564455	cg04167867	TSS200	MORC1	5hmC	shore	NA
346	chr3	108836693	108837620	12	2.76254e-16	0.129676	-0.198829	-0.0564455	cg16259931	Body	MORC1	5hmC	shore	NA
346	chr3	108836693	108837620	12	2.76254e-16	0.129676	-0.198829	-0.0564455	cg19857541	Body	MORC1	5hmC	island	NA
346	chr3	108836693	108837620	12	2.76254e-16	0.129676	-0.198829	-0.0564455	cg05148217	1stExon	MORC1	5hmC	island	NA
346	chr3	108836693	108837620	12	2.76254e-16	0.129676	-0.198829	-0.0564455	cg23550947	1stExon;5'UTR	MORC1;MORC1	5hmC	island	NA
346	chr3	108836693	108837620	12	2.76254e-16	0.129676	-0.198829	-0.0564455	cg09436190	TSS200	MORC1	5hmC	island	NA
346	chr3	108836693	108837620	12	2.76254e-16	0.129676	-0.198829	-0.0564455	cg26540808	TSS200	MORC1	5hmC	island	NA
346	chr3	108836693	108837620	12	2.76254e-16	0.129676	-0.198829	-0.0564455	cg25456186	TSS200	MORC1	5hmC	island	NA
346	chr3	108836693	108837620	12	2.76254e-16	0.129676	-0.198829	-0.0564455	cg18733433	TSS200	MORC1	5hmC	island	NA
346	chr3	108836693	108837620	12	2.76254e-16	0.129676	-0.198829	-0.0564455	cg14566661	TSS200	MORC1	5hmC	island	NA
346	chr3	108836693	108837620	12	2.76254e-16	0.129676	-0.198829	-0.0564455	cg07090057	TSS1500	MORC1	5hmC	shore	NA
346	chr3	108836693	108837620	12	2.76254e-16	0.129676	-0.198829	-0.0564455	cg25092670	TSS1500	MORC1	5hmC	shore	NA
347	chr11	4870255	4870453	2	2.61888e-13	0.131853	-0.130807	-0.0703363	cg11042501	TSS200	OR51S1		open sea	NA
347	chr11	4870255	4870453	2	2.61888e-13	0.131853	-0.130807	-0.0703363	cg12812834	1stExon	OR51S1		open sea	NA
348	chr17	30469691	30469938	3	7.6499e-13	0.133876	0.0165615	0.00110588	cg26944981	Body;Body;Body	RHOT1;RHOT1;RHOT1		island	NA
348	chr17	30469691	30469938	3	7.6499e-13	0.133876	0.0165615	0.00110588	cg25004693	5'UTR;1stExon;1stExon;1stExon;5'UTR;5'UTR	RHOT1;RHOT1;RHOT1;RHOT1;RHOT1;RHOT1		island	NA
348	chr17	30469691	30469938	3	7.6499e-13	0.133876	0.0165615	0.00110588	cg13960358	Body;Body;Body	RHOT1;RHOT1;RHOT1		island	NA
349	chr1	3195414	3196042	5	6.72558e-18	0.135011	-0.146791	-0.0344376	cg02067098	Body;Body	PRDM16;PRDM16		island	NA
349	chr1	3195414	3196042	5	6.72558e-18	0.135011	-0.146791	-0.0344376	cg09032732	Body;Body	PRDM16;PRDM16		island	NA
349	chr1	3195414	3196042	5	6.72558e-18	0.135011	-0.146791	-0.0344376	cg13789673	Body;Body	PRDM16;PRDM16		island	NA
349	chr1	3195414	3196042	5	6.72558e-18	0.135011	-0.146791	-0.0344376	cg24256745	Body;Body	PRDM16;PRDM16		island	NA
349	chr1	3195414	3196042	5	6.72558e-18	0.135011	-0.146791	-0.0344376	cg00701856	Body;Body	PRDM16;PRDM16		island	NA
350	chr5	132759700	132759792	2	5.14975e-10	0.137882	0.134133	0.0708855	cg11279294	Body	FSTL4		open sea	NA
350	chr5	132759700	132759792	2	5.14975e-10	0.137882	0.134133	0.0708855	cg10914727	Body	FSTL4		open sea	NA
351	chr6	31129883	31130548	12	1.09435e-10	0.141154	-0.104621	-0.0357473	cg20347648	3'UTR;3'UTR	TCF19;TCF19		shelf	NA
351	chr6	31129883	31130548	12	1.09435e-10	0.141154	-0.104621	-0.0357473	cg10647991	Body;Body	TCF19;TCF19		shelf	NA
351	chr6	31129883	31130548	12	1.09435e-10	0.141154	-0.104621	-0.0357473	cg07950252	Body;Body	TCF19;TCF19		shelf	NA
351	chr6	31129883	31130548	12	1.09435e-10	0.141154	-0.104621	-0.0357473	cg23998635	Body;Body	TCF19;TCF19		shelf	NA
351	chr6	31129883	31130548	12	1.09435e-10	0.141154	-0.104621	-0.0357473	cg06652085	Body;Body	TCF19;TCF19		shelf	NA
351	chr6	31129883	31130548	12	1.09435e-10	0.141154	-0.104621	-0.0357473	cg11982471	Body;Body	TCF19;TCF19		shelf	NA
351	chr6	31129883	31130548	12	1.09435e-10	0.141154	-0.104621	-0.0357473	cg07094194	Body;Body	TCF19;TCF19		shelf	NA
351	chr6	31129883	31130548	12	1.09435e-10	0.141154	-0.104621	-0.0357473	cg26586118	Body;Body	TCF19;TCF19		shelf	NA
351	chr6	31129883	31130548	12	1.09435e-10	0.141154	-0.104621	-0.0357473	cg03303475	Body;Body	TCF19;TCF19		shelf	NA
351	chr6	31129883	31130548	12	1.09435e-10	0.141154	-0.104621	-0.0357473	cg20217307	Body;Body	TCF19;TCF19		shelf	NA
351	chr6	31129883	31130548	12	1.09435e-10	0.141154	-0.104621	-0.0357473	cg23819653	Body;Body	TCF19;TCF19		shelf	NA
351	chr6	31129883	31130548	12	1.09435e-10	0.141154	-0.104621	-0.0357473	cg18050521	3'UTR;3'UTR	TCF19;TCF19		shelf	NA
352	chr16	968682	969468	5	2.40738e-17	0.141363	-0.192557	-0.0906964	cg03836831	Body	LMF1		shore	NA
352	chr16	968682	969468	5	2.40738e-17	0.141363	-0.192557	-0.0906964	cg08531623	Body	LMF1		shore	NA
352	chr16	968682	969468	5	2.40738e-17	0.141363	-0.192557	-0.0906964	cg04454872	Body	LMF1		shore	NA
352	chr16	968682	969468	5	2.40738e-17	0.141363	-0.192557	-0.0906964	cg27578227	Body	LMF1		shore	NA
352	chr16	968682	969468	5	2.40738e-17	0.141363	-0.192557	-0.0906964	cg16709691	Body	LMF1		shore	NA
353	chr16	88371314	88371417	3	1.20922e-10	0.148913	-0.147756	-0.0814952	cg00394385				open sea	NA
353	chr16	88371314	88371417	3	1.20922e-10	0.148913	-0.147756	-0.0814952	cg01205832				open sea	NA
353	chr16	88371314	88371417	3	1.20922e-10	0.148913	-0.147756	-0.0814952	cg07268240				open sea	NA
354	chr17	9850262	9850268	2	3.00761e-13	0.149981	-0.146607	-0.085659	cg26217185	Body;Body;Body;Body	GAS7;GAS7;GAS7;GAS7	5hmC	open sea	NA
354	chr17	9850262	9850268	2	3.00761e-13	0.149981	-0.146607	-0.085659	cg16537306	Body;Body;Body;Body	GAS7;GAS7;GAS7;GAS7	5hmC	open sea	NA
355	chr11	73008025	73008839	3	1.17069e-15	0.150043	-0.146529	-0.0629112	cg19349543	Body;Body;Body;Body	P2RY6;P2RY6;P2RY6;P2RY6		open sea	NA
355	chr11	73008025	73008839	3	1.17069e-15	0.150043	-0.146529	-0.0629112	cg24191821	Body;Body;Body;Body	P2RY6;P2RY6;P2RY6;P2RY6		open sea	NA
355	chr11	73008025	73008839	3	1.17069e-15	0.150043	-0.146529	-0.0629112	cg04481053	3'UTR;3'UTR;3'UTR;3'UTR	P2RY6;P2RY6;P2RY6;P2RY6		open sea	NA
356	chr5	195276	195698	3	1.78746e-12	0.150761	-0.230661	-0.102947	cg25621286				shore	NA
356	chr5	195276	195698	3	1.78746e-12	0.150761	-0.230661	-0.102947	cg00084435	Body	LRRC14B		island	NA
356	chr5	195276	195698	3	1.78746e-12	0.150761	-0.230661	-0.102947	cg00099519				shore	NA
357	chr4	103749726	103749966	2	1.70913e-12	0.152224	-0.0461902	-0.0269255	cg06670463	TSS1500;Body;TSS1500;TSS1500;TSS1500;TSS1500;TSS1500;5'UTR	UBE2D3;UBE2D3;UBE2D3;UBE2D3;UBE2D3;UBE2D3;UBE2D3;UBE2D3		shore	NA
357	chr4	103749726	103749966	2	1.70913e-12	0.152224	-0.0461902	-0.0269255	cg15783691	TSS1500;TSS1500;TSS1500;TSS1500;Body;TSS1500;TSS1500;5'UTR;TSS1500	UBE2D3;UBE2D3;UBE2D3;UBE2D3;UBE2D3;UBE2D3;UBE2D3;UBE2D3;UBE2D3		shore	NA
358	chr1	7764642	7764737	2	4.7518e-16	0.15304	-0.0139566	-0.0084811	cg08640609	Body	CAMTA1		island	NA
358	chr1	7764642	7764737	2	4.7518e-16	0.15304	-0.0139566	-0.0084811	cg01373292	Body	CAMTA1		island	NA
359	chr4	1052158	1052717	5	2.48959e-11	0.15828	-0.12468	-0.0419896	cg20531169			5hmC	shelf	NA
359	chr4	1052158	1052717	5	2.48959e-11	0.15828	-0.12468	-0.0419896	cg13180566			5hmC	shelf	NA
359	chr4	1052158	1052717	5	2.48959e-11	0.15828	-0.12468	-0.0419896	cg04423820			5hmC	shelf	NA
359	chr4	1052158	1052717	5	2.48959e-11	0.15828	-0.12468	-0.0419896	cg15377758			5hmC	shelf	NA
359	chr4	1052158	1052717	5	2.48959e-11	0.15828	-0.12468	-0.0419896	cg24696728			5hmC	shelf	NA
360	chr8	145018816	145019377	9	1.80878e-12	0.161706	-0.0586314	-0.0255578	cg13984060	Body;Body;1stExon;Body;TSS1500;Body	PLEC1;PLEC1;PLEC1;PLEC1;PLEC1;PLEC1		island	NA
360	chr8	145018816	145019377	9	1.80878e-12	0.161706	-0.0586314	-0.0255578	cg07898713	Body;Body;1stExon;Body;TSS1500;Body	PLEC1;PLEC1;PLEC1;PLEC1;PLEC1;PLEC1		island	NA
360	chr8	145018816	145019377	9	1.80878e-12	0.161706	-0.0586314	-0.0255578	cg17960164	Body;Body;Body;TSS1500;Body;TSS200	PLEC1;PLEC1;PLEC1;PLEC1;PLEC1;PLEC1		island	NA
360	chr8	145018816	145019377	9	1.80878e-12	0.161706	-0.0586314	-0.0255578	cg07690326	Body;Body;Body;TSS1500;Body;TSS200	PLEC1;PLEC1;PLEC1;PLEC1;PLEC1;PLEC1		island	NA
360	chr8	145018816	145019377	9	1.80878e-12	0.161706	-0.0586314	-0.0255578	cg11956819	Body;Body;Body;TSS1500;Body;TSS200	PLEC1;PLEC1;PLEC1;PLEC1;PLEC1;PLEC1		island	NA
360	chr8	145018816	145019377	9	1.80878e-12	0.161706	-0.0586314	-0.0255578	cg03537810	Body;Body;Body;TSS1500;Body;TSS200	PLEC1;PLEC1;PLEC1;PLEC1;PLEC1;PLEC1		island	NA
360	chr8	145018816	145019377	9	1.80878e-12	0.161706	-0.0586314	-0.0255578	cg16783170	Body;Body;Body;TSS1500;Body;TSS200	PLEC1;PLEC1;PLEC1;PLEC1;PLEC1;PLEC1		island	NA
360	chr8	145018816	145019377	9	1.80878e-12	0.161706	-0.0586314	-0.0255578	cg09406760	Body;Body;TSS1500;Body;TSS1500;Body	PLEC1;PLEC1;PLEC1;PLEC1;PLEC1;PLEC1		island	NA
360	chr8	145018816	145019377	9	1.80878e-12	0.161706	-0.0586314	-0.0255578	cg00128812	Body;Body;Body;TSS1500;Body;TSS1500;Body	PLEC1;MIR661;PLEC1;PLEC1;PLEC1;PLEC1;PLEC1		shore	NA
361	chr4	164088166	164088659	6	1.26699e-11	0.164045	-0.127898	-0.0341874	cg18120808	TSS1500;TSS1500	NAF1;NAF1		shore	NA
361	chr4	164088166	164088659	6	1.26699e-11	0.164045	-0.127898	-0.0341874	cg13399164	TSS200;TSS200	NAF1;NAF1		shore	NA
361	chr4	164088166	164088659	6	1.26699e-11	0.164045	-0.127898	-0.0341874	cg11051510	TSS200;TSS200	NAF1;NAF1		shore	NA
361	chr4	164088166	164088659	6	1.26699e-11	0.164045	-0.127898	-0.0341874	cg09150075	TSS200;TSS200	NAF1;NAF1		shore	NA
361	chr4	164088166	164088659	6	1.26699e-11	0.164045	-0.127898	-0.0341874	cg24309739	TSS1500;TSS1500	NAF1;NAF1		shore	NA
361	chr4	164088166	164088659	6	1.26699e-11	0.164045	-0.127898	-0.0341874	cg18023724	TSS1500;TSS1500	NAF1;NAF1		shore	NA
362	chr17	77960371	77960689	2	5.79171e-20	0.16643	0.165687	0.0599142	cg08731068	Body	TBC1D16		open sea	NA
362	chr17	77960371	77960689	2	5.79171e-20	0.16643	0.165687	0.0599142	cg11496593	Body	TBC1D16		open sea	NA
363	chr7	131864510	131864608	2	9.04113e-12	0.166918	-0.161723	-0.0913907	cg03295361	Body	PLXNA4	5hmC	open sea	NA
363	chr7	131864510	131864608	2	9.04113e-12	0.166918	-0.161723	-0.0913907	cg09244601	Body	PLXNA4	5hmC	open sea	V$CREBP1_Q2
364	chr12	49319453	49319767	6	5.95379e-11	0.16863	0.093127	0.0101395	cg15147435	TSS200;TSS1500;TSS200	FKBP11;FKBP11;FKBP11		island	NA
364	chr12	49319453	49319767	6	5.95379e-11	0.16863	0.093127	0.0101395	cg21672339	TSS200;TSS1500;TSS200	FKBP11;FKBP11;FKBP11		island	NA
364	chr12	49319453	49319767	6	5.95379e-11	0.16863	0.093127	0.0101395	cg11067907	TSS200;TSS1500;TSS200	FKBP11;FKBP11;FKBP11		shore	NA
364	chr12	49319453	49319767	6	5.95379e-11	0.16863	0.093127	0.0101395	cg03566156	TSS1500;TSS1500;TSS1500	FKBP11;FKBP11;FKBP11		shore	NA
364	chr12	49319453	49319767	6	5.95379e-11	0.16863	0.093127	0.0101395	cg22864266	TSS1500;TSS1500;TSS1500	FKBP11;FKBP11;FKBP11		shore	NA
364	chr12	49319453	49319767	6	5.95379e-11	0.16863	0.093127	0.0101395	cg20346388	TSS1500;TSS1500;TSS1500	FKBP11;FKBP11;FKBP11		shore	NA
365	chr6	33131072	33131893	12	6.98671e-14	0.169104	-0.123212	-0.047212	cg12881453	Body;Body;Body	COL11A2;COL11A2;COL11A2	5hmC	shelf	NA
365	chr6	33131072	33131893	12	6.98671e-14	0.169104	-0.123212	-0.047212	cg26998481	3'UTR;3'UTR;3'UTR	COL11A2;COL11A2;COL11A2	5hmC	shore	NA
365	chr6	33131072	33131893	12	6.98671e-14	0.169104	-0.123212	-0.047212	cg17931986	3'UTR;3'UTR;3'UTR	COL11A2;COL11A2;COL11A2	5hmC	shore	NA
365	chr6	33131072	33131893	12	6.98671e-14	0.169104	-0.123212	-0.047212	cg01881428	3'UTR;3'UTR;3'UTR	COL11A2;COL11A2;COL11A2	5hmC	shore	NA
365	chr6	33131072	33131893	12	6.98671e-14	0.169104	-0.123212	-0.047212	cg02304614	3'UTR;3'UTR;3'UTR	COL11A2;COL11A2;COL11A2	5hmC	shore	NA
365	chr6	33131072	33131893	12	6.98671e-14	0.169104	-0.123212	-0.047212	cg07703081	3'UTR;3'UTR;3'UTR	COL11A2;COL11A2;COL11A2	5hmC	shore	NA
365	chr6	33131072	33131893	12	6.98671e-14	0.169104	-0.123212	-0.047212	cg04249605	Body;Body;Body	COL11A2;COL11A2;COL11A2	5hmC	shore	NA
365	chr6	33131072	33131893	12	6.98671e-14	0.169104	-0.123212	-0.047212	cg04464727	Body;Body;Body	COL11A2;COL11A2;COL11A2	5hmC	shelf	NA
365	chr6	33131072	33131893	12	6.98671e-14	0.169104	-0.123212	-0.047212	cg08077736	Body;Body;Body	COL11A2;COL11A2;COL11A2	5hmC	shelf	NA
365	chr6	33131072	33131893	12	6.98671e-14	0.169104	-0.123212	-0.047212	cg10390980	Body;Body;Body	COL11A2;COL11A2;COL11A2	5hmC	shelf	NA
365	chr6	33131072	33131893	12	6.98671e-14	0.169104	-0.123212	-0.047212	cg14782559	Body;Body;Body	COL11A2;COL11A2;COL11A2	5hmC	shelf	NA
365	chr6	33131072	33131893	12	6.98671e-14	0.169104	-0.123212	-0.047212	cg22044585	3'UTR;3'UTR;3'UTR	COL11A2;COL11A2;COL11A2		shore	NA
366	chr5	179290641	179290765	3	1.76638e-15	0.169893	-0.254679	-0.113124	cg23934776	Body;Body	TBC1D9B;TBC1D9B		open sea	NA
366	chr5	179290641	179290765	3	1.76638e-15	0.169893	-0.254679	-0.113124	cg27090289	Body;Body	TBC1D9B;TBC1D9B		open sea	NA
366	chr5	179290641	179290765	3	1.76638e-15	0.169893	-0.254679	-0.113124	cg24795093	Body;Body	TBC1D9B;TBC1D9B		open sea	NA
367	chr1	3058199	3059820	10	2.2825e-23	0.173508	0.208939	0.0123487	cg13388191	Body;Body	PRDM16;PRDM16		island	NA
367	chr1	3058199	3059820	10	2.2825e-23	0.173508	0.208939	0.0123487	cg03226435	Body;Body	PRDM16;PRDM16		shore	NA
367	chr1	3058199	3059820	10	2.2825e-23	0.173508	0.208939	0.0123487	cg19243842	Body;Body	PRDM16;PRDM16		shore	NA
367	chr1	3058199	3059820	10	2.2825e-23	0.173508	0.208939	0.0123487	cg22510139	Body;Body	PRDM16;PRDM16		shore	NA
367	chr1	3058199	3059820	10	2.2825e-23	0.173508	0.208939	0.0123487	cg24968931	Body;Body	PRDM16;PRDM16		island	NA
367	chr1	3058199	3059820	10	2.2825e-23	0.173508	0.208939	0.0123487	cg14516243	Body;Body	PRDM16;PRDM16		island	NA
367	chr1	3058199	3059820	10	2.2825e-23	0.173508	0.208939	0.0123487	cg01047045	Body;Body	PRDM16;PRDM16		island	NA
367	chr1	3058199	3059820	10	2.2825e-23	0.173508	0.208939	0.0123487	cg09221035	Body;Body	PRDM16;PRDM16		shore	NA
367	chr1	3058199	3059820	10	2.2825e-23	0.173508	0.208939	0.0123487	cg24300981	Body;Body	PRDM16;PRDM16		shore	NA
367	chr1	3058199	3059820	10	2.2825e-23	0.173508	0.208939	0.0123487	cg25745135	Body;Body	PRDM16;PRDM16		shore	NA
368	chr2	26696038	26696104	3	2.22176e-11	0.175152	-0.186272	-0.082606	cg23221866	Body;Body;Body;Body	OTOF;OTOF;OTOF;OTOF		open sea	NA
368	chr2	26696038	26696104	3	2.22176e-11	0.175152	-0.186272	-0.082606	cg07296854	Body;Body;Body;Body	OTOF;OTOF;OTOF;OTOF		open sea	NA
368	chr2	26696038	26696104	3	2.22176e-11	0.175152	-0.186272	-0.082606	cg15113090	Body;Body;Body;Body	OTOF;OTOF;OTOF;OTOF		open sea	NA
369	chr16	67695462	67696204	15	8.28807e-22	0.179119	-0.216803	-0.0524619	cg09268125	Body;TSS1500;TSS1500;Body;TSS1500	PARD6A;ACD;ACD;PARD6A;ACD	5hmC	shore	NA
369	chr16	67695462	67696204	15	8.28807e-22	0.179119	-0.216803	-0.0524619	cg26685294	Body;TSS1500;TSS1500;Body;TSS1500	PARD6A;ACD;ACD;PARD6A;ACD	5hmC	shore	NA
369	chr16	67695462	67696204	15	8.28807e-22	0.179119	-0.216803	-0.0524619	cg26919100	Body;TSS1500;TSS1500;Body;TSS1500	PARD6A;ACD;ACD;PARD6A;ACD	5hmC	island	NA
369	chr16	67695462	67696204	15	8.28807e-22	0.179119	-0.216803	-0.0524619	cg09321029	Body;TSS1500;TSS1500;Body;TSS1500	PARD6A;ACD;ACD;PARD6A;ACD	5hmC	shore	NA
369	chr16	67695462	67696204	15	8.28807e-22	0.179119	-0.216803	-0.0524619	cg07492143	Body;TSS1500;TSS1500;Body;TSS1500	PARD6A;ACD;ACD;PARD6A;ACD	5hmC	shore	NA
369	chr16	67695462	67696204	15	8.28807e-22	0.179119	-0.216803	-0.0524619	cg20707345	Body;TSS1500;TSS1500;Body;TSS1500	PARD6A;ACD;ACD;PARD6A;ACD	5hmC	shore	NA
369	chr16	67695462	67696204	15	8.28807e-22	0.179119	-0.216803	-0.0524619	cg07469744	Body;TSS1500;TSS1500;Body;TSS1500	PARD6A;ACD;ACD;PARD6A;ACD	5hmC	shore	NA
369	chr16	67695462	67696204	15	8.28807e-22	0.179119	-0.216803	-0.0524619	cg26988853	Body;TSS1500;TSS1500;Body;TSS1500	PARD6A;ACD;ACD;PARD6A;ACD	5hmC	shore	NA
369	chr16	67695462	67696204	15	8.28807e-22	0.179119	-0.216803	-0.0524619	cg26698580	Body;TSS1500;TSS1500;Body;TSS1500	PARD6A;ACD;ACD;PARD6A;ACD	5hmC	shore	NA
369	chr16	67695462	67696204	15	8.28807e-22	0.179119	-0.216803	-0.0524619	cg03934313	Body;TSS1500;TSS1500;Body;TSS1500	PARD6A;ACD;ACD;PARD6A;ACD	5hmC	shore	NA
369	chr16	67695462	67696204	15	8.28807e-22	0.179119	-0.216803	-0.0524619	cg27219874	Body;TSS1500;TSS1500;Body;TSS1500	PARD6A;ACD;ACD;PARD6A;ACD	5hmC	shore	NA
369	chr16	67695462	67696204	15	8.28807e-22	0.179119	-0.216803	-0.0524619	cg04788956	Body;TSS1500;TSS1500;Body;TSS1500	PARD6A;ACD;ACD;PARD6A;ACD	5hmC	shore	V$COMP1_01
369	chr16	67695462	67696204	15	8.28807e-22	0.179119	-0.216803	-0.0524619	cg00318436	Body;TSS1500;TSS1500;Body;TSS1500	PARD6A;ACD;ACD;PARD6A;ACD	5hmC	shore	NA
369	chr16	67695462	67696204	15	8.28807e-22	0.179119	-0.216803	-0.0524619	cg04607024	Body;TSS1500;TSS1500;Body;TSS1500	PARD6A;ACD;ACD;PARD6A;ACD	5hmC	shore	NA
369	chr16	67695462	67696204	15	8.28807e-22	0.179119	-0.216803	-0.0524619	cg11698099	Body;TSS1500;TSS1500;Body;TSS1500	PARD6A;ACD;ACD;PARD6A;ACD		island	NA
370	chr4	3671380	3671503	2	7.3559e-11	0.180395	-0.241302	-0.137511	cg23980059				island	NA
370	chr4	3671380	3671503	2	7.3559e-11	0.180395	-0.241302	-0.137511	cg01454430				island	NA
371	chr17	2324794	2325143	5	1.64527e-13	0.181007	-0.129005	-0.0654957	cg06291314	Body	METT10D		open sea	NA
371	chr17	2324794	2325143	5	1.64527e-13	0.181007	-0.129005	-0.0654957	cg05185021	Body	METT10D		open sea	NA
371	chr17	2324794	2325143	5	1.64527e-13	0.181007	-0.129005	-0.0654957	cg22846776	Body	METT10D		open sea	NA
371	chr17	2324794	2325143	5	1.64527e-13	0.181007	-0.129005	-0.0654957	cg26710891	Body	METT10D		open sea	NA
371	chr17	2324794	2325143	5	1.64527e-13	0.181007	-0.129005	-0.0654957	cg25821781	Body	METT10D		open sea	NA
372	chr12	52473014	52473462	4	1.12717e-13	0.187251	0.174269	0.0430405	cg25351353				island	NA
372	chr12	52473014	52473462	4	1.12717e-13	0.187251	0.174269	0.0430405	cg02060434				shore	NA
372	chr12	52473014	52473462	4	1.12717e-13	0.187251	0.174269	0.0430405	cg27109650				island	NA
372	chr12	52473014	52473462	4	1.12717e-13	0.187251	0.174269	0.0430405	cg05124918				island	NA
373	chr11	118763674	118764003	6	4.63306e-10	0.190093	-0.130916	-0.0493797	cg04537602	Body;TSS1500	CXCR5;CXCR5		open sea	NA
373	chr11	118763674	118764003	6	4.63306e-10	0.190093	-0.130916	-0.0493797	cg03386765	Body;TSS1500	CXCR5;CXCR5		open sea	NA
373	chr11	118763674	118764003	6	4.63306e-10	0.190093	-0.130916	-0.0493797	cg13298528	Body;TSS1500	CXCR5;CXCR5		open sea	NA
373	chr11	118763674	118764003	6	4.63306e-10	0.190093	-0.130916	-0.0493797	cg19791714	Body;TSS200	CXCR5;CXCR5		open sea	NA
373	chr11	118763674	118764003	6	4.63306e-10	0.190093	-0.130916	-0.0493797	cg04903691	Body;TSS200	CXCR5;CXCR5		open sea	NA
373	chr11	118763674	118764003	6	4.63306e-10	0.190093	-0.130916	-0.0493797	cg03523129	Body;TSS200	CXCR5;CXCR5		open sea	NA
374	chr12	122356316	122356598	4	3.25473e-10	0.193721	-0.0210392	-0.0123634	cg21171335	TSS200	WDR66	5hmC, BS	island	NA
374	chr12	122356316	122356598	4	3.25473e-10	0.193721	-0.0210392	-0.0123634	cg22618164	TSS200	WDR66	5hmC, BS	island	NA
374	chr12	122356316	122356598	4	3.25473e-10	0.193721	-0.0210392	-0.0123634	cg21016266	1stExon;5'UTR	WDR66;WDR66	5hmC, BS	island	NA
374	chr12	122356316	122356598	4	3.25473e-10	0.193721	-0.0210392	-0.0123634	cg01765077	TSS200	WDR66	BS	island	NA
375	chr1	22919873	22920169	4	5.82415e-12	0.198052	-0.169494	-0.088198	cg05266226	Body	EPHA8		island	NA
375	chr1	22919873	22920169	4	5.82415e-12	0.198052	-0.169494	-0.088198	cg11721177	Body	EPHA8		island	NA
375	chr1	22919873	22920169	4	5.82415e-12	0.198052	-0.169494	-0.088198	cg15597364	Body	EPHA8		island	NA
375	chr1	22919873	22920169	4	5.82415e-12	0.198052	-0.169494	-0.088198	cg05269784	Body	EPHA8		island	NA
376	chr2	242678597	242678841	3	4.03074e-11	0.198508	-0.142796	-0.042348	cg08408937	Body	D2HGDH		shelf	NA
376	chr2	242678597	242678841	3	4.03074e-11	0.198508	-0.142796	-0.042348	cg18093328	Body	D2HGDH		shelf	NA
376	chr2	242678597	242678841	3	4.03074e-11	0.198508	-0.142796	-0.042348	cg16944026	Body	D2HGDH		shelf	NA
377	chr19	54242124	54242243	2	1.04271e-10	0.199493	-0.0842236	-0.0303207	cg09430586	TSS1500	MIR518A2	5hmC	open sea	NA
377	chr19	54242124	54242243	2	1.04271e-10	0.199493	-0.0842236	-0.0303207	cg02336334	TSS1500	MIR518A2	5hmC	open sea	NA
378	chr11	65626522	65627070	4	3.2023e-15	0.20047	-0.0443824	-0.0168001	cg04055107	TSS1500;TSS1500	MUS81;CFL1		island	NA
378	chr11	65626522	65627070	4	3.2023e-15	0.20047	-0.0443824	-0.0168001	cg09539256	TSS1500;TSS1500	MUS81;CFL1		island	NA
378	chr11	65626522	65627070	4	3.2023e-15	0.20047	-0.0443824	-0.0168001	cg12873305	TSS1500;TSS1500	MUS81;CFL1		island	NA
378	chr11	65626522	65627070	4	3.2023e-15	0.20047	-0.0443824	-0.0168001	cg11620896	TSS1500;TSS1500	MUS81;CFL1		island	NA
378	chr11	65626522	65627070	4	3.2023e-15	0.20047	-0.0443824	-0.0168001	cg04946535	TSS1500;TSS1500	MUS81;CFL1		island	NA
379	chr6	32016070	32016535	18	2.9009e-10	0.205492	0.118448	0.0400284	cg13771753	Body	TNXB		open sea	NA
379	chr6	32016070	32016535	18	2.9009e-10	0.205492	0.118448	0.0400284	cg15727424	Body	TNXB		open sea	NA
379	chr6	32016070	32016535	18	2.9009e-10	0.205492	0.118448	0.0400284	cg19455923	Body	TNXB		open sea	NA
379	chr6	32016070	32016535	18	2.9009e-10	0.205492	0.118448	0.0400284	cg15670990	Body	TNXB		open sea	NA
379	chr6	32016070	32016535	18	2.9009e-10	0.205492	0.118448	0.0400284	cg17115172	Body	TNXB		open sea	NA
379	chr6	32016070	32016535	18	2.9009e-10	0.205492	0.118448	0.0400284	cg02432444	Body	TNXB		open sea	NA
379	chr6	32016070	32016535	18	2.9009e-10	0.205492	0.118448	0.0400284	cg19964491	Body	TNXB		open sea	NA
379	chr6	32016070	32016535	18	2.9009e-10	0.205492	0.118448	0.0400284	cg11493661	Body	TNXB		open sea	NA
379	chr6	32016070	32016535	18	2.9009e-10	0.205492	0.118448	0.0400284	cg08661360	Body	TNXB		open sea	NA
379	chr6	32016070	32016535	18	2.9009e-10	0.205492	0.118448	0.0400284	cg05473289	Body	TNXB		open sea	NA
379	chr6	32016070	32016535	18	2.9009e-10	0.205492	0.118448	0.0400284	cg15840758	Body	TNXB		open sea	NA
379	chr6	32016070	32016535	18	2.9009e-10	0.205492	0.118448	0.0400284	cg13279955	Body	TNXB		open sea	NA
379	chr6	32016070	32016535	18	2.9009e-10	0.205492	0.118448	0.0400284	cg24376689	Body	TNXB		open sea	NA
379	chr6	32016070	32016535	18	2.9009e-10	0.205492	0.118448	0.0400284	cg05298224	Body	TNXB		open sea	NA
379	chr6	32016070	32016535	18	2.9009e-10	0.205492	0.118448	0.0400284	cg09474017	Body	TNXB		open sea	NA
379	chr6	32016070	32016535	18	2.9009e-10	0.205492	0.118448	0.0400284	cg04293778	Body	TNXB		open sea	NA
379	chr6	32016070	32016535	18	2.9009e-10	0.205492	0.118448	0.0400284	cg10500474	Body	TNXB		open sea	NA
379	chr6	32016070	32016535	18	2.9009e-10	0.205492	0.118448	0.0400284	cg15398152	Body	TNXB		open sea	NA
380	chr15	51057417	51057859	4	1.16972e-12	0.207335	-0.0402289	-0.021068	cg10469659	1stExon	SPPL2A		island	NA
380	chr15	51057417	51057859	4	1.16972e-12	0.207335	-0.0402289	-0.021068	cg15683743	Body	SPPL2A		shore	NA
380	chr15	51057417	51057859	4	1.16972e-12	0.207335	-0.0402289	-0.021068	cg20971014	5'UTR;1stExon	SPPL2A;SPPL2A		island	NA
380	chr15	51057417	51057859	4	1.16972e-12	0.207335	-0.0402289	-0.021068	cg15445111	5'UTR;1stExon	SPPL2A;SPPL2A		island	NA
381	chr1	18026187	18026411	3	8.56663e-12	0.216896	-0.171782	-0.0827525	cg07194152				shelf	NA
381	chr1	18026187	18026411	3	8.56663e-12	0.216896	-0.171782	-0.0827525	cg19508454				shelf	NA
381	chr1	18026187	18026411	3	8.56663e-12	0.216896	-0.171782	-0.0827525	cg26664979				shelf	NA
382	chr17	29158582	29159410	8	1.64471e-14	0.21838	-0.0174904	-0.00755482	cg27574673	TSS200	ATAD5		island	NA
382	chr17	29158582	29159410	8	1.64471e-14	0.21838	-0.0174904	-0.00755482	cg04872018	TSS200	ATAD5		island	V$E2F_02
382	chr17	29158582	29159410	8	1.64471e-14	0.21838	-0.0174904	-0.00755482	cg15439745	TSS1500	ATAD5		shore	NA
382	chr17	29158582	29159410	8	1.64471e-14	0.21838	-0.0174904	-0.00755482	cg18469326	TSS200	ATAD5		island	NA
382	chr17	29158582	29159410	8	1.64471e-14	0.21838	-0.0174904	-0.00755482	cg14595059	TSS200	ATAD5		island	NA
382	chr17	29158582	29159410	8	1.64471e-14	0.21838	-0.0174904	-0.00755482	cg03407648	TSS200	ATAD5		island	NA
382	chr17	29158582	29159410	8	1.64471e-14	0.21838	-0.0174904	-0.00755482	cg17167972	TSS200	ATAD5		island	V$E2F_02
382	chr17	29158582	29159410	8	1.64471e-14	0.21838	-0.0174904	-0.00755482	cg23905935	1stExon;5'UTR	ATAD5;ATAD5		island	NA
382	chr17	29158582	29159410	8	1.64471e-14	0.21838	-0.0174904	-0.00755482	cg05936487	1stExon	ATAD5		island	NA
383	chr5	175299035	175300027	6	1.66463e-17	0.221252	-0.0654805	-0.0147816	cg14678099	5'UTR;5'UTR	CPLX2;CPLX2		island	NA
383	chr5	175299035	175300027	6	1.66463e-17	0.221252	-0.0654805	-0.0147816	cg06833732	5'UTR;5'UTR	CPLX2;CPLX2		island	NA
383	chr5	175299035	175300027	6	1.66463e-17	0.221252	-0.0654805	-0.0147816	cg16590189	5'UTR;5'UTR	CPLX2;CPLX2		island	NA
383	chr5	175299035	175300027	6	1.66463e-17	0.221252	-0.0654805	-0.0147816	cg26982364	5'UTR;5'UTR	CPLX2;CPLX2		island	NA
383	chr5	175299035	175300027	6	1.66463e-17	0.221252	-0.0654805	-0.0147816	cg01450705	5'UTR;5'UTR	CPLX2;CPLX2		island	NA
384	chr1	160312163	160312544	4	6.39236e-11	0.221946	-0.0416422	-0.0196739	cg10382814	Body;Body;TSS1500	COPA;COPA;NCSTN		shore	NA
384	chr1	160312163	160312544	4	6.39236e-11	0.221946	-0.0416422	-0.0196739	cg15623398	Body;Body;TSS1500	COPA;COPA;NCSTN		shore	NA
384	chr1	160312163	160312544	4	6.39236e-11	0.221946	-0.0416422	-0.0196739	cg27497900	Body;Body;TSS1500	COPA;COPA;NCSTN		shore	NA
384	chr1	160312163	160312544	4	6.39236e-11	0.221946	-0.0416422	-0.0196739	cg05266784	Body;Body;TSS1500	COPA;COPA;NCSTN		shore	NA
385	chr16	4258150	4258342	2	2.66134e-11	0.223407	-0.13945	-0.0776835	cg03833429	Body	SRL		open sea	NA
385	chr16	4258150	4258342	2	2.66134e-11	0.223407	-0.13945	-0.0776835	cg10065739	Body	SRL		open sea	NA
386	chr1	54355272	54355906	9	1.47866e-11	0.226118	-0.0398674	-0.0113911	cg01401694	TSS200	YIPF1		island	NA
386	chr1	54355272	54355906	9	1.47866e-11	0.226118	-0.0398674	-0.0113911	cg06269281	TSS200	YIPF1		island	NA
386	chr1	54355272	54355906	9	1.47866e-11	0.226118	-0.0398674	-0.0113911	cg23061257	5'UTR	YIPF1		shore	NA
386	chr1	54355272	54355906	9	1.47866e-11	0.226118	-0.0398674	-0.0113911	cg12579676	5'UTR	YIPF1		shore	NA
386	chr1	54355272	54355906	9	1.47866e-11	0.226118	-0.0398674	-0.0113911	cg14176676	TSS200	YIPF1		island	NA
386	chr1	54355272	54355906	9	1.47866e-11	0.226118	-0.0398674	-0.0113911	cg24160082	TSS200	YIPF1		island	NA
386	chr1	54355272	54355906	9	1.47866e-11	0.226118	-0.0398674	-0.0113911	cg03752759	TSS1500	YIPF1		island	NA
386	chr1	54355272	54355906	9	1.47866e-11	0.226118	-0.0398674	-0.0113911	cg13262752	TSS1500	YIPF1		shore	NA
386	chr1	54355272	54355906	9	1.47866e-11	0.226118	-0.0398674	-0.0113911	cg03341469	TSS1500	YIPF1		shore	NA
387	chr22	50170670	50170866	2	3.2384e-12	0.235965	-0.167249	-0.0917947	cg03941531	Body	BRD1	5hmC	island	NA
387	chr22	50170670	50170866	2	3.2384e-12	0.235965	-0.167249	-0.0917947	cg21821726	Body	BRD1	5hmC	island	NA
388	chr10	134734520	134734693	3	8.63568e-11	0.239901	-0.107451	-0.0529831	cg16084830				shore	NA
388	chr10	134734520	134734693	3	8.63568e-11	0.239901	-0.107451	-0.0529831	cg06388605				shore	NA
388	chr10	134734520	134734693	3	8.63568e-11	0.239901	-0.107451	-0.0529831	cg00647046				shore	NA
389	chr15	101586790	101587053	2	1.32104e-12	0.241341	-0.153512	-0.0677475	cg14590214	Body	LRRK1	5hmC	open sea	NA
389	chr15	101586790	101587053	2	1.32104e-12	0.241341	-0.153512	-0.0677475	cg08750547	Body	LRRK1	5hmC	open sea	NA
390	chr5	1879698	1880310	4	7.05533e-12	0.261703	0.0602541	0.0149997	cg14970046	Body	IRX4		shore	NA
390	chr5	1879698	1880310	4	7.05533e-12	0.261703	0.0602541	0.0149997	cg17774559	Body	IRX4		island	NA
390	chr5	1879698	1880310	4	7.05533e-12	0.261703	0.0602541	0.0149997	cg04095339	Body	IRX4		island	NA
390	chr5	1879698	1880310	4	7.05533e-12	0.261703	0.0602541	0.0149997	cg02238012	Body	IRX4		shore	NA
391	chr5	1111049	1112355	10	8.31724e-18	0.265648	0.098841	0.0030823	cg26439015	Body	SLC12A7		island	NA
391	chr5	1111049	1112355	10	8.31724e-18	0.265648	0.098841	0.0030823	cg13592947	Body	SLC12A7		shore	NA
391	chr5	1111049	1112355	10	8.31724e-18	0.265648	0.098841	0.0030823	cg24886748	Body	SLC12A7		island	NA
391	chr5	1111049	1112355	10	8.31724e-18	0.265648	0.098841	0.0030823	cg26078244	1stExon;5'UTR	SLC12A7;SLC12A7		island	NA
391	chr5	1111049	1112355	10	8.31724e-18	0.265648	0.098841	0.0030823	cg11962947	TSS200	SLC12A7		island	NA
391	chr5	1111049	1112355	10	8.31724e-18	0.265648	0.098841	0.0030823	cg15680989	TSS200	SLC12A7		island	NA
391	chr5	1111049	1112355	10	8.31724e-18	0.265648	0.098841	0.0030823	cg19524810	TSS200	SLC12A7		island	NA
391	chr5	1111049	1112355	10	8.31724e-18	0.265648	0.098841	0.0030823	cg06748231	TSS200	SLC12A7		island	NA
391	chr5	1111049	1112355	10	8.31724e-18	0.265648	0.098841	0.0030823	cg21985251	TSS200	SLC12A7		island	NA
391	chr5	1111049	1112355	10	8.31724e-18	0.265648	0.098841	0.0030823	cg23091824	TSS200	SLC12A7		island	NA
392	chr12	115135045	115136308	32	4.49207e-31	0.265688	-0.0359801	-0.00622504	cg23367107				island	NA
392	chr12	115135045	115136308	32	4.49207e-31	0.265688	-0.0359801	-0.00622504	cg05398903				shore	NA
392	chr12	115135045	115136308	32	4.49207e-31	0.265688	-0.0359801	-0.00622504	cg21045464				shore	NA
392	chr12	115135045	115136308	32	4.49207e-31	0.265688	-0.0359801	-0.00622504	cg12713060				shore	NA
392	chr12	115135045	115136308	32	4.49207e-31	0.265688	-0.0359801	-0.00622504	cg08618204				shore	NA
392	chr12	115135045	115136308	32	4.49207e-31	0.265688	-0.0359801	-0.00622504	cg23754320				shore	NA
392	chr12	115135045	115136308	32	4.49207e-31	0.265688	-0.0359801	-0.00622504	cg26385172				shore	NA
392	chr12	115135045	115136308	32	4.49207e-31	0.265688	-0.0359801	-0.00622504	cg03723247				shore	NA
392	chr12	115135045	115136308	32	4.49207e-31	0.265688	-0.0359801	-0.00622504	cg08162222				shore	NA
392	chr12	115135045	115136308	32	4.49207e-31	0.265688	-0.0359801	-0.00622504	cg15402529				shore	NA
392	chr12	115135045	115136308	32	4.49207e-31	0.265688	-0.0359801	-0.00622504	cg25106645				shore	NA
392	chr12	115135045	115136308	32	4.49207e-31	0.265688	-0.0359801	-0.00622504	cg23342718				shore	NA
392	chr12	115135045	115136308	32	4.49207e-31	0.265688	-0.0359801	-0.00622504	cg10767192				shore	NA
392	chr12	115135045	115136308	32	4.49207e-31	0.265688	-0.0359801	-0.00622504	cg00737571				shore	NA
392	chr12	115135045	115136308	32	4.49207e-31	0.265688	-0.0359801	-0.00622504	cg18788932				shore	NA
392	chr12	115135045	115136308	32	4.49207e-31	0.265688	-0.0359801	-0.00622504	cg17173663				shore	NA
392	chr12	115135045	115136308	32	4.49207e-31	0.265688	-0.0359801	-0.00622504	cg14793406				shore	NA
392	chr12	115135045	115136308	32	4.49207e-31	0.265688	-0.0359801	-0.00622504	cg19248676				island	NA
392	chr12	115135045	115136308	32	4.49207e-31	0.265688	-0.0359801	-0.00622504	cg11078221				island	NA
392	chr12	115135045	115136308	32	4.49207e-31	0.265688	-0.0359801	-0.00622504	cg12368612				island	NA
392	chr12	115135045	115136308	32	4.49207e-31	0.265688	-0.0359801	-0.00622504	cg12698813				island	NA
392	chr12	115135045	115136308	32	4.49207e-31	0.265688	-0.0359801	-0.00622504	cg07147449				island	NA
392	chr12	115135045	115136308	32	4.49207e-31	0.265688	-0.0359801	-0.00622504	cg15266705				island	NA
392	chr12	115135045	115136308	32	4.49207e-31	0.265688	-0.0359801	-0.00622504	cg22586653				island	NA
392	chr12	115135045	115136308	32	4.49207e-31	0.265688	-0.0359801	-0.00622504	cg22489153				island	NA
392	chr12	115135045	115136308	32	4.49207e-31	0.265688	-0.0359801	-0.00622504	cg19887700				island	NA
392	chr12	115135045	115136308	32	4.49207e-31	0.265688	-0.0359801	-0.00622504	cg17101165				island	NA
392	chr12	115135045	115136308	32	4.49207e-31	0.265688	-0.0359801	-0.00622504	cg01622437				island	NA
392	chr12	115135045	115136308	32	4.49207e-31	0.265688	-0.0359801	-0.00622504	cg12106728				island	NA
392	chr12	115135045	115136308	32	4.49207e-31	0.265688	-0.0359801	-0.00622504	cg07969619				island	NA
392	chr12	115135045	115136308	32	4.49207e-31	0.265688	-0.0359801	-0.00622504	cg12513880				island	NA
392	chr12	115135045	115136308	32	4.49207e-31	0.265688	-0.0359801	-0.00622504	cg11199046				island	NA
393	chr16	56701918	56702158	6	2.46874e-11	0.274806	0.0615025	0.0394417	cg16452857	TSS200	MT1G		island	NA
393	chr16	56701918	56702158	6	2.46874e-11	0.274806	0.0615025	0.0394417	cg03566142	1stExon;5'UTR	MT1G;MT1G		island	NA
393	chr16	56701918	56702158	6	2.46874e-11	0.274806	0.0615025	0.0394417	cg07791866	TSS200	MT1G		island	NA
393	chr16	56701918	56702158	6	2.46874e-11	0.274806	0.0615025	0.0394417	cg27367960	TSS200	MT1G		island	NA
393	chr16	56701918	56702158	6	2.46874e-11	0.274806	0.0615025	0.0394417	cg07602841	TSS200	MT1G		island	NA
393	chr16	56701918	56702158	6	2.46874e-11	0.274806	0.0615025	0.0394417	cg02803037	TSS200	MT1G		island	NA
394	chr19	10444479	10445124	5	2.17287e-14	0.275211	0.0464297	0.00574937	cg25279553	TSS1500;Body	RAVER1;ICAM3		island	NA
394	chr19	10444479	10445124	5	2.17287e-14	0.275211	0.0464297	0.00574937	cg19645616	TSS1500;Body	RAVER1;ICAM3		island	NA
394	chr19	10444479	10445124	5	2.17287e-14	0.275211	0.0464297	0.00574937	cg00397283	3'UTR;TSS200	ICAM3;RAVER1		island	NA
394	chr19	10444479	10445124	5	2.17287e-14	0.275211	0.0464297	0.00574937	cg07976603	3'UTR;TSS200	ICAM3;RAVER1		island	NA
394	chr19	10444479	10445124	5	2.17287e-14	0.275211	0.0464297	0.00574937	cg13911392	TSS1500;Body	RAVER1;ICAM3		island	NA
395	chr10	135062102	135062155	2	2.15201e-11	0.283481	-0.100248	-0.0475743	cg14524334	TSS1500	MIR202	5hmC	open sea	NA
395	chr10	135062102	135062155	2	2.15201e-11	0.283481	-0.100248	-0.0475743	cg07944707	TSS1500	MIR202	5hmC	open sea	NA
396	chr15	74420890	74421535	4	5.63634e-10	0.284674	-0.0475619	-0.0207819	cg25828462	Body;TSS1500;TSS200;TSS1500;TSS1500	LOC283731;ISLR2;ISLR2;ISLR2;ISLR2		island	NA
396	chr15	74420890	74421535	4	5.63634e-10	0.284674	-0.0475619	-0.0207819	cg04138492	Body;TSS1500;TSS1500	LOC283731;ISLR2;ISLR2		island	NA
396	chr15	74420890	74421535	4	5.63634e-10	0.284674	-0.0475619	-0.0207819	cg05547902	Body;TSS1500;TSS200;TSS1500;TSS1500	LOC283731;ISLR2;ISLR2;ISLR2;ISLR2		island	NA
396	chr15	74420890	74421535	4	5.63634e-10	0.284674	-0.0475619	-0.0207819	cg00781110	Body;TSS1500;TSS200;TSS1500;TSS1500	LOC283731;ISLR2;ISLR2;ISLR2;ISLR2		island	NA
397	chr6	33943520	33944367	6	4.05015e-21	0.284927	0.132662	0.0267068	cg00333679				island	NA
397	chr6	33943520	33944367	6	4.05015e-21	0.284927	0.132662	0.0267068	cg01600222				shore	NA
397	chr6	33943520	33944367	6	4.05015e-21	0.284927	0.132662	0.0267068	cg12279419				island	NA
397	chr6	33943520	33944367	6	4.05015e-21	0.284927	0.132662	0.0267068	cg22244192				island	NA
397	chr6	33943520	33944367	6	4.05015e-21	0.284927	0.132662	0.0267068	cg08864645				island	NA
397	chr6	33943520	33944367	6	4.05015e-21	0.284927	0.132662	0.0267068	cg18468519				shore	NA
398	chr4	154265415	154266059	6	8.17437e-16	0.285516	-0.022958	-0.00957665	cg02675375	TSS200	MND1		island	NA
398	chr4	154265415	154266059	6	8.17437e-16	0.285516	-0.022958	-0.00957665	cg12943363	TSS1500	MND1		shore	NA
398	chr4	154265415	154266059	6	8.17437e-16	0.285516	-0.022958	-0.00957665	cg13326581	TSS1500	MND1		shore	NA
398	chr4	154265415	154266059	6	8.17437e-16	0.285516	-0.022958	-0.00957665	cg14320796	TSS1500	MND1		shore	NA
398	chr4	154265415	154266059	6	8.17437e-16	0.285516	-0.022958	-0.00957665	cg12383491	TSS200	MND1		island	NA
398	chr4	154265415	154266059	6	8.17437e-16	0.285516	-0.022958	-0.00957665	cg18350702	Body	MND1		island	NA
399	chr1	185285595	185286075	4	1.3355e-12	0.288424	-0.0147793	-0.00814462	cg14257449	5'UTR	IVNS1ABP		island	NA
399	chr1	185285595	185286075	4	1.3355e-12	0.288424	-0.0147793	-0.00814462	cg22398595	5'UTR	IVNS1ABP		island	NA
399	chr1	185285595	185286075	4	1.3355e-12	0.288424	-0.0147793	-0.00814462	cg12384126	5'UTR	IVNS1ABP		island	NA
399	chr1	185285595	185286075	4	1.3355e-12	0.288424	-0.0147793	-0.00814462	cg25423402	5'UTR	IVNS1ABP		island	NA
400	chr10	127462176	127462344	2	3.91853e-16	0.289036	-0.117845	-0.0571728	cg25400200	Body	MMP21		shore	NA
400	chr10	127462176	127462344	2	3.91853e-16	0.289036	-0.117845	-0.0571728	cg25906360	Body	MMP21		island	NA
401	chr11	117947214	117947555	3	2.86094e-10	0.29303	-0.108797	-0.0654313	cg26118131	TSS1500;TSS1500	TMPRSS4;TMPRSS4	5hmC	open sea	NA
401	chr11	117947214	117947555	3	2.86094e-10	0.29303	-0.108797	-0.0654313	cg13159318	TSS1500;TSS1500	TMPRSS4;TMPRSS4	5hmC	open sea	NA
401	chr11	117947214	117947555	3	2.86094e-10	0.29303	-0.108797	-0.0654313	cg05775918	TSS200;TSS200	TMPRSS4;TMPRSS4	5hmC	open sea	NA
402	chr6	30656499	30656667	5	7.12146e-11	0.295061	-0.137745	-0.0730604	cg08743794	TSS1500;Body;TSS1500	KIAA1949;NRM;KIAA1949	5hmC	shore	NA
402	chr6	30656499	30656667	5	7.12146e-11	0.295061	-0.137745	-0.0730604	cg03922146	TSS1500;Body;TSS1500	KIAA1949;NRM;KIAA1949	5hmC	shore	NA
402	chr6	30656499	30656667	5	7.12146e-11	0.295061	-0.137745	-0.0730604	cg24710951	TSS1500;Body;TSS1500	KIAA1949;NRM;KIAA1949	5hmC	shore	NA
402	chr6	30656499	30656667	5	7.12146e-11	0.295061	-0.137745	-0.0730604	cg26004235	TSS1500;Body;TSS1500	KIAA1949;NRM;KIAA1949	5hmC	shore	NA
402	chr6	30656499	30656667	5	7.12146e-11	0.295061	-0.137745	-0.0730604	cg14646977	Body;TSS1500	NRM;KIAA1949	5hmC	shore	NA
403	chr6	30121774	30123034	17	9.72582e-22	0.304203	-0.251094	-0.0528625	cg01748268	Body;Body	TRIM10;TRIM10	5hmC, BS	open sea	NA
403	chr6	30121774	30123034	17	9.72582e-22	0.304203	-0.251094	-0.0528625	cg11553183	Body;Body	TRIM10;TRIM10	5hmC, BS	open sea	NA
403	chr6	30121774	30123034	17	9.72582e-22	0.304203	-0.251094	-0.0528625	cg18267047	Body;Body	TRIM10;TRIM10	5hmC, BS	open sea	NA
403	chr6	30121774	30123034	17	9.72582e-22	0.304203	-0.251094	-0.0528625	cg05762309	Body;Body	TRIM10;TRIM10	5hmC, BS	open sea	NA
403	chr6	30121774	30123034	17	9.72582e-22	0.304203	-0.251094	-0.0528625	cg03957649	Body;Body	TRIM10;TRIM10	5hmC, BS	open sea	NA
403	chr6	30121774	30123034	17	9.72582e-22	0.304203	-0.251094	-0.0528625	cg08513123	Body;Body	TRIM10;TRIM10	5hmC, BS	open sea	NA
403	chr6	30121774	30123034	17	9.72582e-22	0.304203	-0.251094	-0.0528625	cg24329658	Body;Body	TRIM10;TRIM10	5hmC, BS	open sea	NA
403	chr6	30121774	30123034	17	9.72582e-22	0.304203	-0.251094	-0.0528625	cg27119877	Body;Body	TRIM10;TRIM10	5hmC, BS	open sea	NA
403	chr6	30121774	30123034	17	9.72582e-22	0.304203	-0.251094	-0.0528625	cg08508724	Body;Body	TRIM10;TRIM10	5hmC, BS	open sea	NA
403	chr6	30121774	30123034	17	9.72582e-22	0.304203	-0.251094	-0.0528625	cg06111486	Body;Body	TRIM10;TRIM10	5hmC, BS	open sea	NA
403	chr6	30121774	30123034	17	9.72582e-22	0.304203	-0.251094	-0.0528625	cg16206678	Body;Body	TRIM10;TRIM10	5hmC, BS	open sea	NA
403	chr6	30121774	30123034	17	9.72582e-22	0.304203	-0.251094	-0.0528625	cg27000368	Body;Body	TRIM10;TRIM10	5hmC, BS	open sea	NA
403	chr6	30121774	30123034	17	9.72582e-22	0.304203	-0.251094	-0.0528625	cg08094206	Body;Body	TRIM10;TRIM10	5hmC, BS	open sea	NA
403	chr6	30121774	30123034	17	9.72582e-22	0.304203	-0.251094	-0.0528625	cg07873154	Body;Body	TRIM10;TRIM10	5hmC, BS	open sea	NA
403	chr6	30121774	30123034	17	9.72582e-22	0.304203	-0.251094	-0.0528625	cg24847621	Body;Body	TRIM10;TRIM10	5hmC, BS	open sea	NA
403	chr6	30121774	30123034	17	9.72582e-22	0.304203	-0.251094	-0.0528625	cg05266816	Body;Body	TRIM10;TRIM10	5hmC	open sea	NA
403	chr6	30121774	30123034	17	9.72582e-22	0.304203	-0.251094	-0.0528625	cg05793094	Body;Body	TRIM10;TRIM10		open sea	NA
404	chr16	86653176	86653215	2	1.37421e-11	0.306232	0.0927575	0.0406531	cg16625119				open sea	NA
404	chr16	86653176	86653215	2	1.37421e-11	0.306232	0.0927575	0.0406531	cg06255006				open sea	NA
405	chr19	45996372	45996498	4	8.63568e-11	0.32329	-0.0751362	-0.0385865	cg02899346	Body;Body;Body	RTN2;RTN2;RTN2		shore	NA
405	chr19	45996372	45996498	4	8.63568e-11	0.32329	-0.0751362	-0.0385865	cg01005968	5'UTR;Body;1stExon;Body	RTN2;RTN2;RTN2;RTN2		shore	NA
405	chr19	45996372	45996498	4	8.63568e-11	0.32329	-0.0751362	-0.0385865	cg19031575	5'UTR;Body;1stExon;Body	RTN2;RTN2;RTN2;RTN2		shore	NA
405	chr19	45996372	45996498	4	8.63568e-11	0.32329	-0.0751362	-0.0385865	cg19869610	Body;Body;TSS200	RTN2;RTN2;RTN2		shore	NA
406	chr15	59498649	59499291	7	4.03565e-13	0.324143	-0.136246	-0.0492831	cg13600755	1stExon;5'UTR;Body	LDHAL6B;LDHAL6B;MYO1E		island	NA
406	chr15	59498649	59499291	7	4.03565e-13	0.324143	-0.136246	-0.0492831	cg03429785	Body;TSS1500	MYO1E;LDHAL6B		shore	NA
406	chr15	59498649	59499291	7	4.03565e-13	0.324143	-0.136246	-0.0492831	cg18809535	Body;TSS1500	MYO1E;LDHAL6B		shore	NA
406	chr15	59498649	59499291	7	4.03565e-13	0.324143	-0.136246	-0.0492831	cg04426326	TSS200;Body	LDHAL6B;MYO1E		island	NA
406	chr15	59498649	59499291	7	4.03565e-13	0.324143	-0.136246	-0.0492831	cg15479073	TSS200;Body	LDHAL6B;MYO1E		island	NA
406	chr15	59498649	59499291	7	4.03565e-13	0.324143	-0.136246	-0.0492831	cg18567687	1stExon;Body	LDHAL6B;MYO1E		island	NA
406	chr15	59498649	59499291	7	4.03565e-13	0.324143	-0.136246	-0.0492831	cg13138539	1stExon;Body	LDHAL6B;MYO1E		island	NA
407	chr2	242660564	242660724	3	4.23706e-11	0.328278	-0.161591	-0.070901	cg20518810	Body	ING5		shelf	NA
407	chr2	242660564	242660724	3	4.23706e-11	0.328278	-0.161591	-0.070901	cg03647581	Body	ING5		shelf	NA
407	chr2	242660564	242660724	3	4.23706e-11	0.328278	-0.161591	-0.070901	cg03515380	Body	ING5		shelf	NA
408	chr11	43333782	43333988	2	1.11028e-11	0.340656	-0.0243104	-0.0112453	cg25028523	Body;Body;Body;Body	API5;API5;API5;API5		shore	NA
408	chr11	43333782	43333988	2	1.11028e-11	0.340656	-0.0243104	-0.0112453	cg13808561	Body;Body;Body;Body	API5;API5;API5;API5		island	NA
409	chr16	30710278	30710486	4	4.46809e-12	0.345845	-0.0170029	-0.00694915	cg02635953	TSS200	SRCAP		island	NA
409	chr16	30710278	30710486	4	4.46809e-12	0.345845	-0.0170029	-0.00694915	cg04482088	TSS200	SRCAP		island	NA
409	chr16	30710278	30710486	4	4.46809e-12	0.345845	-0.0170029	-0.00694915	cg26635366	TSS200	SRCAP		island	NA
409	chr16	30710278	30710486	4	4.46809e-12	0.345845	-0.0170029	-0.00694915	cg04257638	5'UTR;1stExon	SRCAP;SRCAP		shore	V$PPARG_01
410	chr6	28911759	28911873	2	4.24419e-10	0.348291	-0.035651	-0.018077	cg23326313				open sea	NA
410	chr6	28911759	28911873	2	4.24419e-10	0.348291	-0.035651	-0.018077	cg04742282				open sea	NA
411	chr6	42928274	42928497	12	8.17329e-10	0.35449	-0.0219134	-0.00451894	cg17345569	TSS1500	GNMT		island	NA
411	chr6	42928274	42928497	12	8.17329e-10	0.35449	-0.0219134	-0.00451894	cg07941301	TSS1500	GNMT		island	NA
411	chr6	42928274	42928497	12	8.17329e-10	0.35449	-0.0219134	-0.00451894	cg04013093	TSS200	GNMT		island	NA
411	chr6	42928274	42928497	12	8.17329e-10	0.35449	-0.0219134	-0.00451894	cg11409096	TSS200	GNMT		island	NA
411	chr6	42928274	42928497	12	8.17329e-10	0.35449	-0.0219134	-0.00451894	cg23696834	TSS200	GNMT		island	NA
411	chr6	42928274	42928497	12	8.17329e-10	0.35449	-0.0219134	-0.00451894	cg19051105	TSS200	GNMT		island	NA
411	chr6	42928274	42928497	12	8.17329e-10	0.35449	-0.0219134	-0.00451894	cg05642143	TSS200	GNMT		island	NA
411	chr6	42928274	42928497	12	8.17329e-10	0.35449	-0.0219134	-0.00451894	cg16590910	TSS200	GNMT		island	NA
411	chr6	42928274	42928497	12	8.17329e-10	0.35449	-0.0219134	-0.00451894	cg13397359	TSS200	GNMT		island	NA
411	chr6	42928274	42928497	12	8.17329e-10	0.35449	-0.0219134	-0.00451894	cg02353165	TSS200	GNMT		island	NA
411	chr6	42928274	42928497	12	8.17329e-10	0.35449	-0.0219134	-0.00451894	cg24101359	TSS200	GNMT		island	NA
411	chr6	42928274	42928497	12	8.17329e-10	0.35449	-0.0219134	-0.00451894	cg05552183	TSS200	GNMT		island	NA
412	chr6	34433320	34434325	12	6.39262e-17	0.356323	-0.0572076	-0.015526	cg25473981	TSS1500	PACSIN1		island	NA
412	chr6	34433320	34434325	12	6.39262e-17	0.356323	-0.0572076	-0.015526	cg23239444	TSS1500	PACSIN1		shore	NA
412	chr6	34433320	34434325	12	6.39262e-17	0.356323	-0.0572076	-0.015526	cg12990116	TSS1500	PACSIN1		shore	NA
412	chr6	34433320	34434325	12	6.39262e-17	0.356323	-0.0572076	-0.015526	cg25808577	TSS1500	PACSIN1		island	NA
412	chr6	34433320	34434325	12	6.39262e-17	0.356323	-0.0572076	-0.015526	cg20405174	TSS200	PACSIN1		island	NA
412	chr6	34433320	34434325	12	6.39262e-17	0.356323	-0.0572076	-0.015526	cg05994148	TSS200	PACSIN1		island	NA
412	chr6	34433320	34434325	12	6.39262e-17	0.356323	-0.0572076	-0.015526	cg05233674	TSS200	PACSIN1		island	NA
412	chr6	34433320	34434325	12	6.39262e-17	0.356323	-0.0572076	-0.015526	cg05106897	TSS200	PACSIN1		island	NA
412	chr6	34433320	34434325	12	6.39262e-17	0.356323	-0.0572076	-0.015526	cg00444847	TSS200	PACSIN1		island	NA
412	chr6	34433320	34434325	12	6.39262e-17	0.356323	-0.0572076	-0.015526	cg16984332	1stExon;5'UTR	PACSIN1;PACSIN1		island	NA
412	chr6	34433320	34434325	12	6.39262e-17	0.356323	-0.0572076	-0.015526	cg23043245	5'UTR	PACSIN1		island	NA
412	chr6	34433320	34434325	12	6.39262e-17	0.356323	-0.0572076	-0.015526	cg06623698	5'UTR	PACSIN1		island	NA
413	chr13	21714535	21715145	10	1.81724e-16	0.357967	-0.0424182	-0.00918734	cg21067709	TSS200	SAP18		island	NA
413	chr13	21714535	21715145	10	1.81724e-16	0.357967	-0.0424182	-0.00918734	cg21495568	Body	SAP18		shore	NA
413	chr13	21714535	21715145	10	1.81724e-16	0.357967	-0.0424182	-0.00918734	cg23823879	TSS200	SAP18		island	NA
413	chr13	21714535	21715145	10	1.81724e-16	0.357967	-0.0424182	-0.00918734	cg20750606	TSS200	SAP18		island	NA
413	chr13	21714535	21715145	10	1.81724e-16	0.357967	-0.0424182	-0.00918734	cg23549264	TSS200	SAP18		island	NA
413	chr13	21714535	21715145	10	1.81724e-16	0.357967	-0.0424182	-0.00918734	cg01456440	TSS200	SAP18		island	NA
413	chr13	21714535	21715145	10	1.81724e-16	0.357967	-0.0424182	-0.00918734	cg25808926	1stExon	SAP18		island	NA
413	chr13	21714535	21715145	10	1.81724e-16	0.357967	-0.0424182	-0.00918734	cg04592544	1stExon	SAP18		island	NA
413	chr13	21714535	21715145	10	1.81724e-16	0.357967	-0.0424182	-0.00918734	cg25495394	1stExon	SAP18		island	NA
413	chr13	21714535	21715145	10	1.81724e-16	0.357967	-0.0424182	-0.00918734	cg16685607	Body	SAP18		island	NA
414	chr12	58158888	58159051	2	2.03858e-11	0.372127	0.0912937	0.0444172	cg23101118	Body	CYP27B1		island	NA
414	chr12	58158888	58159051	2	2.03858e-11	0.372127	0.0912937	0.0444172	cg16984335	Body	CYP27B1		island	NA
415	chr11	2153991	2154934	9	5.76853e-14	0.377256	-0.102081	-0.0468384	cg07096953	Body;Body;Body;Body	INS-IGF2;IGF2;IGF2;IGF2		island	V$EGR3_01
415	chr11	2153991	2154934	9	5.76853e-14	0.377256	-0.102081	-0.0468384	cg22956483	Body;Body;Body;Body	INS-IGF2;IGF2;IGF2;IGF2		shore	NA
415	chr11	2153991	2154934	9	5.76853e-14	0.377256	-0.102081	-0.0468384	cg02807948	Body;3'UTR;3'UTR;3'UTR	INS-IGF2;IGF2;IGF2;IGF2		shore	NA
415	chr11	2153991	2154934	9	5.76853e-14	0.377256	-0.102081	-0.0468384	cg12528452	Body;3'UTR;3'UTR;3'UTR	INS-IGF2;IGF2;IGF2;IGF2		island	NA
415	chr11	2153991	2154934	9	5.76853e-14	0.377256	-0.102081	-0.0468384	cg13165070	Body;3'UTR;3'UTR;3'UTR	INS-IGF2;IGF2;IGF2;IGF2		island	NA
415	chr11	2153991	2154934	9	5.76853e-14	0.377256	-0.102081	-0.0468384	cg11717189	Body;3'UTR;3'UTR;3'UTR	INS-IGF2;IGF2;IGF2;IGF2		island	NA
415	chr11	2153991	2154934	9	5.76853e-14	0.377256	-0.102081	-0.0468384	cg02613624	Body;Body;Body;Body	INS-IGF2;IGF2;IGF2;IGF2		island	V$EGR3_01
415	chr11	2153991	2154934	9	5.76853e-14	0.377256	-0.102081	-0.0468384	cg26401390	Body;Body;Body;Body	INS-IGF2;IGF2;IGF2;IGF2		shore	NA
415	chr11	2153991	2154934	9	5.76853e-14	0.377256	-0.102081	-0.0468384	cg05384664	Body;Body;Body;Body	INS-IGF2;IGF2;IGF2;IGF2		shore	NA
416	chr1	200841646	200842429	8	1.07692e-14	0.401722	-0.127058	-0.0527059	cg23260502	TSS1500	GPR25		shore	NA
416	chr1	200841646	200842429	8	1.07692e-14	0.401722	-0.127058	-0.0527059	cg26021810	TSS1500	GPR25		shore	NA
416	chr1	200841646	200842429	8	1.07692e-14	0.401722	-0.127058	-0.0527059	cg18758335	TSS1500	GPR25		shore	NA
416	chr1	200841646	200842429	8	1.07692e-14	0.401722	-0.127058	-0.0527059	cg24550456	TSS1500	GPR25		shore	NA
416	chr1	200841646	200842429	8	1.07692e-14	0.401722	-0.127058	-0.0527059	cg01711322	TSS200	GPR25		shore	NA
416	chr1	200841646	200842429	8	1.07692e-14	0.401722	-0.127058	-0.0527059	cg04983977	TSS200	GPR25		shore	NA
416	chr1	200841646	200842429	8	1.07692e-14	0.401722	-0.127058	-0.0527059	cg19940077	1stExon	GPR25		island	V$XBP1_01
416	chr1	200841646	200842429	8	1.07692e-14	0.401722	-0.127058	-0.0527059	cg21870884	1stExon	GPR25		island	NA
417	chr15	73076635	73077046	6	8.03804e-13	0.402932	-0.024579	-0.00714705	cg05159192	TSS1500;TSS1500;TSS1500	ADPGK;ADPGK;ADPGK		shore	NA
417	chr15	73076635	73077046	6	8.03804e-13	0.402932	-0.024579	-0.00714705	cg13094267	TSS1500;TSS1500;TSS1500	ADPGK;ADPGK;ADPGK		island	NA
417	chr15	73076635	73077046	6	8.03804e-13	0.402932	-0.024579	-0.00714705	cg14418942	TSS1500;TSS1500;TSS1500	ADPGK;ADPGK;ADPGK		island	NA
417	chr15	73076635	73077046	6	8.03804e-13	0.402932	-0.024579	-0.00714705	cg11781976	TSS1500;TSS1500;TSS1500	ADPGK;ADPGK;ADPGK		shore	NA
417	chr15	73076635	73077046	6	8.03804e-13	0.402932	-0.024579	-0.00714705	cg00484488	TSS1500;TSS1500;TSS1500	ADPGK;ADPGK;ADPGK		shore	NA
417	chr15	73076635	73077046	6	8.03804e-13	0.402932	-0.024579	-0.00714705	cg10862018	TSS1500;TSS1500;TSS1500	ADPGK;ADPGK;ADPGK		shore	NA
418	chr19	1815917	1816627	10	4.16262e-13	0.409169	-0.142628	-0.0403581	cg02467518	TSS200;Body	MIR1909;REXO1	5hmC	island	NA
418	chr19	1815917	1816627	10	4.16262e-13	0.409169	-0.142628	-0.0403581	cg23202053	3'UTR	REXO1	5hmC	island	NA
418	chr19	1815917	1816627	10	4.16262e-13	0.409169	-0.142628	-0.0403581	cg20442503	Body;Body	REXO1;MIR1909	5hmC	island	NA
418	chr19	1815917	1816627	10	4.16262e-13	0.409169	-0.142628	-0.0403581	cg03413810	TSS200;Body	MIR1909;REXO1	5hmC	island	NA
418	chr19	1815917	1816627	10	4.16262e-13	0.409169	-0.142628	-0.0403581	cg15051795	TSS200;Body	MIR1909;REXO1	5hmC	island	NA
418	chr19	1815917	1816627	10	4.16262e-13	0.409169	-0.142628	-0.0403581	cg24774002	TSS200;Body	MIR1909;REXO1	5hmC	island	NA
418	chr19	1815917	1816627	10	4.16262e-13	0.409169	-0.142628	-0.0403581	cg27091642	TSS200;Body	MIR1909;REXO1	5hmC	island	NA
418	chr19	1815917	1816627	10	4.16262e-13	0.409169	-0.142628	-0.0403581	cg01386868	TSS200;Body	MIR1909;REXO1	5hmC	island	NA
418	chr19	1815917	1816627	10	4.16262e-13	0.409169	-0.142628	-0.0403581	cg02368428	TSS200;Body	MIR1909;REXO1	5hmC	island	NA
418	chr19	1815917	1816627	10	4.16262e-13	0.409169	-0.142628	-0.0403581	cg14763933	TSS1500;Body	MIR1909;REXO1		island	NA
419	chr20	31349752	31349939	2	1.54937e-10	0.409734	-0.144187	-0.072079	cg13636640	TSS1500;TSS1500;TSS1500	DNMT3B;DNMT3B;DNMT3B		shore	NA
419	chr20	31349752	31349939	2	1.54937e-10	0.409734	-0.144187	-0.072079	cg25803642	TSS1500;TSS1500;TSS1500	DNMT3B;DNMT3B;DNMT3B		shore	NA
420	chr1	200708027	200708503	6	1.55155e-13	0.413262	-0.0345021	-0.011292	cg16010827	TSS1500	CAMSAP1L1		island	NA
420	chr1	200708027	200708503	6	1.55155e-13	0.413262	-0.0345021	-0.011292	cg16600927	TSS1500	CAMSAP1L1		island	NA
420	chr1	200708027	200708503	6	1.55155e-13	0.413262	-0.0345021	-0.011292	cg01796184	TSS1500	CAMSAP1L1		island	NA
420	chr1	200708027	200708503	6	1.55155e-13	0.413262	-0.0345021	-0.011292	cg16443152	TSS1500	CAMSAP1L1		island	NA
420	chr1	200708027	200708503	6	1.55155e-13	0.413262	-0.0345021	-0.011292	cg11856688	TSS1500	CAMSAP1L1		island	NA
420	chr1	200708027	200708503	6	1.55155e-13	0.413262	-0.0345021	-0.011292	cg12361356	TSS200	CAMSAP1L1		island	NA
421	chr7	1588284	1588579	4	3.34853e-13	0.414011	-0.171042	-0.067755	cg09495282	Body	TMEM184A		shore	NA
421	chr7	1588284	1588579	4	3.34853e-13	0.414011	-0.171042	-0.067755	cg18705808	Body	TMEM184A		shore	NA
421	chr7	1588284	1588579	4	3.34853e-13	0.414011	-0.171042	-0.067755	cg04633141	Body	TMEM184A		shore	NA
421	chr7	1588284	1588579	4	3.34853e-13	0.414011	-0.171042	-0.067755	cg23404435	Body	TMEM184A		shore	NA
422	chr6	31698218	31698734	11	7.22698e-11	0.414566	0.109399	0.0235574	cg12216180	Body;TSS1500	CLIC1;DDAH2		shore	NA
422	chr6	31698218	31698734	11	7.22698e-11	0.414566	0.109399	0.0235574	cg00124375	TSS200	DDAH2		island	NA
422	chr6	31698218	31698734	11	7.22698e-11	0.414566	0.109399	0.0235574	cg17983217	TSS200	DDAH2		island	NA
422	chr6	31698218	31698734	11	7.22698e-11	0.414566	0.109399	0.0235574	cg18055007	TSS200	DDAH2		island	NA
422	chr6	31698218	31698734	11	7.22698e-11	0.414566	0.109399	0.0235574	cg03980764	3'UTR;TSS1500	CLIC1;DDAH2		shore	NA
422	chr6	31698218	31698734	11	7.22698e-11	0.414566	0.109399	0.0235574	cg03329603	Body;TSS1500	CLIC1;DDAH2		shore	NA
422	chr6	31698218	31698734	11	7.22698e-11	0.414566	0.109399	0.0235574	cg00657529	Body;TSS1500	CLIC1;DDAH2		shore	NA
422	chr6	31698218	31698734	11	7.22698e-11	0.414566	0.109399	0.0235574	cg14647877	Body;TSS1500	CLIC1;DDAH2		shore	NA
422	chr6	31698218	31698734	11	7.22698e-11	0.414566	0.109399	0.0235574	cg04387059	Body;TSS1500	CLIC1;DDAH2		shore	NA
422	chr6	31698218	31698734	11	7.22698e-11	0.414566	0.109399	0.0235574	cg05157492	Body;TSS1500	CLIC1;DDAH2		shore	NA
423	chr1	43353980	43354136	3	8.25961e-11	0.418902	-0.0868948	-0.0374367	cg05164680				island	NA
423	chr1	43353980	43354136	3	8.25961e-11	0.418902	-0.0868948	-0.0374367	cg16395679				island	NA
423	chr1	43353980	43354136	3	8.25961e-11	0.418902	-0.0868948	-0.0374367	cg10436833				island	NA
424	chr6	31832796	31833747	13	1.18403e-13	0.419215	-0.111611	-0.0300787	cg00123181	Body	SLC44A4		shore	NA
424	chr6	31832796	31833747	13	1.18403e-13	0.419215	-0.111611	-0.0300787	cg20961940	Body	SLC44A4		shore	NA
424	chr6	31832796	31833747	13	1.18403e-13	0.419215	-0.111611	-0.0300787	cg02775414	Body	SLC44A4		shelf	NA
424	chr6	31832796	31833747	13	1.18403e-13	0.419215	-0.111611	-0.0300787	cg25368728	Body	SLC44A4		shelf	NA
424	chr6	31832796	31833747	13	1.18403e-13	0.419215	-0.111611	-0.0300787	cg09153713	Body	SLC44A4		shelf	NA
424	chr6	31832796	31833747	13	1.18403e-13	0.419215	-0.111611	-0.0300787	cg26434400	Body	SLC44A4		shelf	NA
424	chr6	31832796	31833747	13	1.18403e-13	0.419215	-0.111611	-0.0300787	cg07705820	Body	SLC44A4		shelf	NA
424	chr6	31832796	31833747	13	1.18403e-13	0.419215	-0.111611	-0.0300787	cg23701033	Body	SLC44A4		shelf	V$SRF_C;V$YY1_01
424	chr6	31832796	31833747	13	1.18403e-13	0.419215	-0.111611	-0.0300787	cg05686323	Body	SLC44A4		shelf	V$SRF_C;V$YY1_01
424	chr6	31832796	31833747	13	1.18403e-13	0.419215	-0.111611	-0.0300787	cg07546508	Body	SLC44A4		shelf	NA
[truncated: 690 more rows]

## Sheet: TS5. 5hmC-DhMRs
Supplementary Table 5. 5mC-DMRs, 5hmC-DhMRs and BS-DMRs (cohort 2).
DMR_ID	Chr	Start	Stop	no.cpgs	minfdr	Stouffer	maxbetafc	meanbetafc	ProbeIDs	UCSC_RefGene_Group	UCSC_RefGene_Name	CpG in other DMRs	cgi	conserved_tfbs
1	chr1	223900693	223900822	2	9.81503e-27	0.00337211	-0.0470631	-0.0449817	cg18224445	Body;Body	CAPN2;CAPN2	-	island	NA
1	chr1	223900693	223900822	2	9.81503e-27	0.00337211	-0.0470631	-0.0449817	cg07395969	Body;Body	CAPN2;CAPN2	-	island	NA
2	chr11	115860954	115861018	3	3.20645e-12	0.00342707	-0.10509	-0.0848705	cg24543854	-	-	-	open sea	NA
2	chr11	115860954	115861018	3	3.20645e-12	0.00342707	-0.10509	-0.0848705	cg23288099	-	-	-	open sea	NA
2	chr11	115860954	115861018	3	3.20645e-12	0.00342707	-0.10509	-0.0848705	cg01807735	-	-	-	open sea	V$PAX4_01;V$AHRARNT_01
3	chr2	288785	289702	2	5.51212e-13	0.00463014	0.0487186	0.0144913	cg02736505	TSS1500	FAM150B	-	island	NA
3	chr2	288785	289702	2	5.51212e-13	0.00463014	0.0487186	0.0144913	cg13507506	TSS1500	FAM150B	-	island	V$STAT1_01
3	chr2	288785	289702	2	5.51212e-13	0.00463014	0.0487186	0.0144913	cg07800384	TSS1500	FAM150B	-	island	NA
3	chr2	288785	289702	2	5.51212e-13	0.00463014	0.0487186	0.0144913	cg08856347	TSS1500	FAM150B	-	island	NA
3	chr2	288785	289702	2	5.51212e-13	0.00463014	0.0487186	0.0144913	cg18642499	TSS1500	FAM150B	-	island	NA
3	chr2	288785	289702	2	5.51212e-13	0.00463014	0.0487186	0.0144913	cg09985832	TSS1500	FAM150B	-	island	NA
4	chr7	157342543	157342801	3	1.2973e-34	0.00509113	0.176914	0.133522	cg20159095	Body;Body;Body	PTPRN2;PTPRN2;PTPRN2	5mC	open sea	NA
4	chr7	157342543	157342801	3	1.2973e-34	0.00509113	0.176914	0.133522	cg09226185	Body;Body;Body	PTPRN2;PTPRN2;PTPRN2	5mC	shelf	NA
4	chr7	157342543	157342801	3	1.2973e-34	0.00509113	0.176914	0.133522	cg04212285	Body;Body;Body	PTPRN2;PTPRN2;PTPRN2	5mC	shelf	NA
5	chr8	11565530	11566096	2	5.8007e-11	0.00589595	-0.0412885	-0.00303443	cg06704518	5'UTR	GATA4	-	island	NA
5	chr8	11565530	11566096	2	5.8007e-11	0.00589595	-0.0412885	-0.00303443	cg24646414	5'UTR	GATA4	-	island	NA
5	chr8	11565530	11566096	2	5.8007e-11	0.00589595	-0.0412885	-0.00303443	cg09626984	Body	GATA4	-	island	NA
6	chr11	67810742	67811265	3	2.26012e-16	0.00620137	0.148825	0.0955245	cg10301588	Body;1stExon;5'UTR	TCIRG1;TCIRG1;TCIRG1	-	open sea	NA
6	chr11	67810742	67811265	3	2.26012e-16	0.00620137	0.148825	0.0955245	cg24496349	Body;1stExon;5'UTR	TCIRG1;TCIRG1;TCIRG1	-	open sea	NA
6	chr11	67810742	67811265	3	2.26012e-16	0.00620137	0.148825	0.0955245	cg08801887	Body;Body	TCIRG1;TCIRG1	-	open sea	NA
6	chr11	67810742	67811265	3	2.26012e-16	0.00620137	0.148825	0.0955245	cg20865778	Body;Body	TCIRG1;TCIRG1	-	open sea	NA
7	chr16	314666	314811	2	4.68954e-17	0.00634784	0.178641	0.170043	cg08713437	Body	ITFG3	5mC	shelf	NA
7	chr16	314666	314811	2	4.68954e-17	0.00634784	0.178641	0.170043	cg00418913	Body	ITFG3	5mC	shelf	V$PAX5_02
8	chr11	66102055	66102686	6	9.39425e-13	0.00679547	0.162008	0.120186	cg20749584	Body	RIN1	5mC	island	NA
8	chr11	66102055	66102686	6	9.39425e-13	0.00679547	0.162008	0.120186	cg07948432	Body	RIN1	5mC	island	NA
8	chr11	66102055	66102686	6	9.39425e-13	0.00679547	0.162008	0.120186	cg04808027	Body	RIN1	5mC	island	NA
8	chr11	66102055	66102686	6	9.39425e-13	0.00679547	0.162008	0.120186	cg12912663	Body	RIN1	5mC	island	NA
8	chr11	66102055	66102686	6	9.39425e-13	0.00679547	0.162008	0.120186	cg12068791	Body	RIN1	5mC	shore	NA
8	chr11	66102055	66102686	6	9.39425e-13	0.00679547	0.162008	0.120186	cg12062782	Body	RIN1	5mC	shore	NA
9	chr16	723016	723047	2	2.21633e-12	0.00689821	0.276555	0.215943	cg09355190	Body	RHOT2	5mC	shore	NA
9	chr16	723016	723047	2	2.21633e-12	0.00689821	0.276555	0.215943	cg03246570	Body	RHOT2	5mC	shore	NA
10	chr19	51529628	51529999	5	1.12776e-16	0.00780037	0.127875	0.0722135	cg26310000	Body;5'UTR;1stExon;5'UTR;5'UTR	KLK11;KLK11;KLK11;KLK11;KLK11	5mC	open sea	NA
10	chr19	51529628	51529999	5	1.12776e-16	0.00780037	0.127875	0.0722135	cg19912337	Body;5'UTR;5'UTR;5'UTR	KLK11;KLK11;KLK11;KLK11	5mC	open sea	NA
10	chr19	51529628	51529999	5	1.12776e-16	0.00780037	0.127875	0.0722135	cg19318380	Body;5'UTR;TSS200;5'UTR	KLK11;KLK11;KLK11;KLK11	5mC	open sea	NA
10	chr19	51529628	51529999	5	1.12776e-16	0.00780037	0.127875	0.0722135	cg05267952	Body;5'UTR;TSS200;5'UTR	KLK11;KLK11;KLK11;KLK11	5mC	open sea	NA
10	chr19	51529628	51529999	5	1.12776e-16	0.00780037	0.127875	0.0722135	cg08814947	Body;5'UTR;TSS200;5'UTR	KLK11;KLK11;KLK11;KLK11	5mC	open sea	NA
11	chr5	2186856	2187004	3	4.16609e-10	0.00782061	0.138851	0.101803	cg19790972	-	-	-	open sea	NA
11	chr5	2186856	2187004	3	4.16609e-10	0.00782061	0.138851	0.101803	cg09050058	-	-	-	open sea	NA
11	chr5	2186856	2187004	3	4.16609e-10	0.00782061	0.138851	0.101803	cg19486833	-	-	-	open sea	NA
12	chr2	242841239	242841490	3	3.79016e-13	0.00799429	0.167712	0.110596	cg18322739	-	-	-	shelf	NA
12	chr2	242841239	242841490	3	3.79016e-13	0.00799429	0.167712	0.110596	cg19084127	-	-	-	shelf	NA
12	chr2	242841239	242841490	3	3.79016e-13	0.00799429	0.167712	0.110596	cg22435335	-	-	-	shelf	NA
13	chr12	54376019	54376241	2	1.2973e-11	0.00800695	0.0602982	0.0444075	cg04032071	-	-	-	shelf	NA
13	chr12	54376019	54376241	2	1.2973e-11	0.00800695	0.0602982	0.0444075	cg10792302	-	-	-	shelf	V$AHRARNT_01
13	chr12	54376019	54376241	2	1.2973e-11	0.00800695	0.0602982	0.0444075	cg03719428	-	-	-	shelf	V$ROAZ_01
13	chr12	54376019	54376241	2	1.2973e-11	0.00800695	0.0602982	0.0444075	cg06619938	-	-	-	shelf	NA
14	chr14	101507570	101507590	2	1.22505e-12	0.00804495	0.0998092	0.0829219	cg02174748	TSS200	MIR300	-	open sea	NA
14	chr14	101507570	101507590	2	1.22505e-12	0.00804495	0.0998092	0.0829219	cg10137253	TSS200	MIR300	-	open sea	NA
15	chr7	158712271	158712832	3	8.86923e-11	0.00828393	0.0941869	0.0900915	cg19783160	Body	WDR60	-	shore	NA
15	chr7	158712271	158712832	3	8.86923e-11	0.00828393	0.0941869	0.0900915	cg06422381	Body	WDR60	-	island	NA
15	chr7	158712271	158712832	3	8.86923e-11	0.00828393	0.0941869	0.0900915	cg04683035	Body	WDR60	-	island	NA
16	chr13	28502630	28503373	3	8.78003e-13	0.00829777	-0.0251319	-0.0142944	cg06883496	-	-	-	island	NA
16	chr13	28502630	28503373	3	8.78003e-13	0.00829777	-0.0251319	-0.0142944	cg08100687	-	-	-	island	NA
16	chr13	28502630	28503373	3	8.78003e-13	0.00829777	-0.0251319	-0.0142944	cg20194314	-	-	-	island	NA
16	chr13	28502630	28503373	3	8.78003e-13	0.00829777	-0.0251319	-0.0142944	cg17200768	-	-	-	island	NA
17	chr19	51587409	51587945	2	5.30946e-10	0.00842194	0.16007	0.131806	cg25263454	1stExon;5'UTR	KLK14;KLK14	5mC	open sea	NA
17	chr19	51587409	51587945	2	5.30946e-10	0.00842194	0.16007	0.131806	cg24425175	TSS1500	KLK14	5mC	open sea	NA
18	chr5	50684985	50685716	4	1.79587e-15	0.00886608	-0.0749326	-0.00396558	cg14142283	Body	ISL1	-	island	NA
18	chr5	50684985	50685716	4	1.79587e-15	0.00886608	-0.0749326	-0.00396558	cg07362168	Body	ISL1	-	shore	NA
18	chr5	50684985	50685716	4	1.79587e-15	0.00886608	-0.0749326	-0.00396558	cg01904063	Body	ISL1	-	shore	NA
18	chr5	50684985	50685716	4	1.79587e-15	0.00886608	-0.0749326	-0.00396558	cg11486350	Body	ISL1	-	shore	NA
18	chr5	50684985	50685716	4	1.79587e-15	0.00886608	-0.0749326	-0.00396558	cg05710997	Body	ISL1	-	island	NA
18	chr5	50684985	50685716	4	1.79587e-15	0.00886608	-0.0749326	-0.00396558	cg16270526	Body	ISL1	-	island	NA
19	chr14	102226486	102226945	2	2.45505e-16	0.00928686	-0.0237371	-0.0192073	cg21570168	TSS1500;TSS1500	PPP2R5C;PPP2R5C	-	island	NA
19	chr14	102226486	102226945	2	2.45505e-16	0.00928686	-0.0237371	-0.0192073	cg18952599	TSS1500;TSS1500	PPP2R5C;PPP2R5C	-	island	NA
19	chr14	102226486	102226945	2	2.45505e-16	0.00928686	-0.0237371	-0.0192073	cg18086416	-	-	-	shore	NA
19	chr14	102226486	102226945	2	2.45505e-16	0.00928686	-0.0237371	-0.0192073	cg13679478	-	-	-	shore	NA
20	chr16	339492	339544	2	1.01903e-09	0.00945399	0.13351	0.112841	cg26462212	Body;Body	AXIN1;AXIN1	-	shore	NA
20	chr16	339492	339544	2	1.01903e-09	0.00945399	0.13351	0.112841	cg02145319	Body;Body	AXIN1;AXIN1	-	shore	NA
21	chr2	74941807	74942001	2	1.03477e-29	0.0102102	0.281866	0.160418	cg04639610	-	-	-	shore	NA
21	chr2	74941807	74942001	2	1.03477e-29	0.0102102	0.281866	0.160418	cg04669895	-	-	-	shore	NA
22	chr2	95522896	95522902	2	1.48568e-10	0.0103692	-0.07042	-0.0474286	cg08721908	TSS200	ANKRD20B	-	island	NA
22	chr2	95522896	95522902	2	1.48568e-10	0.0103692	-0.07042	-0.0474286	cg23363202	TSS200	ANKRD20B	-	island	NA
23	chr7	158270995	158271081	2	2.91762e-17	0.0104789	0.263551	0.224866	cg04313978	Body;Body;Body	PTPRN2;PTPRN2;PTPRN2	5mC	open sea	NA
23	chr7	158270995	158271081	2	2.91762e-17	0.0104789	0.263551	0.224866	cg17812313	Body;Body;Body	PTPRN2;PTPRN2;PTPRN2	5mC	open sea	NA
24	chr1	29139278	29139522	2	2.80993e-09	0.0105634	0.0980928	0.0678706	cg09970593	Body	OPRD1	-	shore	NA
24	chr1	29139278	29139522	2	2.80993e-09	0.0105634	0.0980928	0.0678706	cg02785792	Body	OPRD1	-	island	NA
25	chr10	372859	373069	2	2.23495e-11	0.0112675	0.167724	0.154979	cg24386905	Body	DIP2C	5mC	shore	NA
25	chr10	372859	373069	2	2.23495e-11	0.0112675	0.167724	0.154979	cg22831256	Body	DIP2C	5mC	island	NA
26	chr1	6137955	6138086	2	1.66344e-09	0.0114855	0.189397	0.156354	cg25880365	Body;Body	KCNAB2;KCNAB2	-	open sea	NA
26	chr1	6137955	6138086	2	1.66344e-09	0.0114855	0.189397	0.156354	cg17179571	Body;Body	KCNAB2;KCNAB2	-	open sea	NA
27	chr17	78896012	78897137	7	1.89574e-20	0.0116489	0.204351	0.0936034	cg21734751	Body;Body	RPTOR;RPTOR	5mC	island	NA
27	chr17	78896012	78897137	7	1.89574e-20	0.0116489	0.204351	0.0936034	cg17052885	Body;Body	RPTOR;RPTOR	5mC	shore	NA
27	chr17	78896012	78897137	7	1.89574e-20	0.0116489	0.204351	0.0936034	cg12044293	Body;Body	RPTOR;RPTOR	5mC	island	NA
27	chr17	78896012	78897137	7	1.89574e-20	0.0116489	0.204351	0.0936034	cg17144164	Body;Body	RPTOR;RPTOR	5mC	island	NA
27	chr17	78896012	78897137	7	1.89574e-20	0.0116489	0.204351	0.0936034	cg24744721	Body;Body	RPTOR;RPTOR	5mC	shore	NA
27	chr17	78896012	78897137	7	1.89574e-20	0.0116489	0.204351	0.0936034	cg06358794	Body;Body	RPTOR;RPTOR	5mC	shore	NA
27	chr17	78896012	78897137	7	1.89574e-20	0.0116489	0.204351	0.0936034	cg26290973	Body;Body	RPTOR;RPTOR	5mC	shore	NA
28	chr14	101525995	101526670	6	3.45562e-17	0.0118034	0.238956	0.114916	cg09213165	Body;TSS1500	MIR154;MIR496	5mC	open sea	NA
28	chr14	101525995	101526670	6	3.45562e-17	0.0118034	0.238956	0.114916	cg05249271	TSS1500;TSS200	MIR496;MIR154	5mC	open sea	NA
28	chr14	101525995	101526670	6	3.45562e-17	0.0118034	0.238956	0.114916	cg06753050	TSS1500;TSS200	MIR496;MIR154	5mC	open sea	NA
28	chr14	101525995	101526670	6	3.45562e-17	0.0118034	0.238956	0.114916	cg15508280	TSS1500;TSS200	MIR496;MIR154	5mC	open sea	NA
28	chr14	101525995	101526670	6	3.45562e-17	0.0118034	0.238956	0.114916	cg14355941	TSS1500	MIR496	5mC, BS	open sea	NA
28	chr14	101525995	101526670	6	3.45562e-17	0.0118034	0.238956	0.114916	cg02883666	TSS1500	MIR496	5mC, BS	open sea	NA
29	chr2	177037364	177037631	2	1.35882e-09	0.0118355	-0.050917	-0.0384545	cg10159630	3'UTR	HOXD3	-	shore	NA
29	chr2	177037364	177037631	2	1.35882e-09	0.0118355	-0.050917	-0.0384545	cg13053653	3'UTR	HOXD3	-	shore	NA
30	chr12	122356390	122356852	4	4.92737e-10	0.0121254	-0.12436	-0.0843211	cg21016266	1stExon;5'UTR	WDR66;WDR66	5mC, BS	island	NA
30	chr12	122356390	122356852	4	4.92737e-10	0.0121254	-0.12436	-0.0843211	cg21171335	TSS200	WDR66	5mC, BS	island	NA
30	chr12	122356390	122356852	4	4.92737e-10	0.0121254	-0.12436	-0.0843211	cg22618164	TSS200	WDR66	5mC, BS	island	NA
30	chr12	122356390	122356852	4	4.92737e-10	0.0121254	-0.12436	-0.0843211	cg10207240	5'UTR	WDR66	BS	island	NA
30	chr12	122356390	122356852	4	4.92737e-10	0.0121254	-0.12436	-0.0843211	cg12705353	5'UTR	WDR66	BS	island	NA
31	chr10	34061612	34062234	3	8.7422e-17	0.0125759	-0.090722	-0.0614581	cg25672060	-	-	-	open sea	NA
31	chr10	34061612	34062234	3	8.7422e-17	0.0125759	-0.090722	-0.0614581	cg02191862	-	-	-	open sea	V$CMYB_01;V$RFX1_01;V$MIF1_01
31	chr10	34061612	34062234	3	8.7422e-17	0.0125759	-0.090722	-0.0614581	cg08662620	-	-	-	open sea	NA
31	chr10	34061612	34062234	3	8.7422e-17	0.0125759	-0.090722	-0.0614581	cg11147278	-	-	-	open sea	NA
32	chr20	36572562	36572741	2	9.6898e-09	0.0129538	0.157756	0.119522	cg17071589	3'UTR	VSTM2L	5mC	island	NA
32	chr20	36572562	36572741	2	9.6898e-09	0.0129538	0.157756	0.119522	cg09337248	Body	VSTM2L	5mC	island	NA
33	chr20	56064151	56064273	3	3.43107e-11	0.012963	0.211771	0.0194547	cg10793301	TSS200	HMGB1L1	-	open sea	NA
33	chr20	56064151	56064273	3	3.43107e-11	0.012963	0.211771	0.0194547	cg22846149	TSS200	HMGB1L1	-	open sea	NA
33	chr20	56064151	56064273	3	3.43107e-11	0.012963	0.211771	0.0194547	cg23291271	TSS200	HMGB1L1	-	open sea	NA
34	chr21	37092865	37093012	2	4.23347e-10	0.0132541	0.0961037	0.0952786	cg00871610	Body	MIR802	-	open sea	NA
34	chr21	37092865	37093012	2	4.23347e-10	0.0132541	0.0961037	0.0952786	cg18862975	TSS200	MIR802	-	open sea	NA
35	chr2	241721922	241722281	3	1.28522e-12	0.0134065	0.250089	0.149826	cg05116145	Body	KIF1A	5mC	island	NA
35	chr2	241721922	241722281	3	1.28522e-12	0.0134065	0.250089	0.149826	cg17500202	Body	KIF1A	5mC	island	NA
35	chr2	241721922	241722281	3	1.28522e-12	0.0134065	0.250089	0.149826	cg01662942	Body	KIF1A	5mC	island	NA
35	chr2	241721922	241722281	3	1.28522e-12	0.0134065	0.250089	0.149826	cg22414499	Body	KIF1A	5mC	shore	NA
36	chr1	92001033	92001242	2	2.26339e-10	0.013487	0.122788	0.100926	cg06915918	-	-	-	island	NA
36	chr1	92001033	92001242	2	2.26339e-10	0.013487	0.122788	0.100926	cg05152465	-	-	-	island	NA
36	chr1	92001033	92001242	2	2.26339e-10	0.013487	0.122788	0.100926	cg23674647	-	-	-	island	NA
37	chr5	3104873	3105012	2	4.36734e-11	0.0142269	-0.132501	-0.106498	cg01939562	-	-	-	open sea	NA
37	chr5	3104873	3105012	2	4.36734e-11	0.0142269	-0.132501	-0.106498	cg15108727	-	-	-	open sea	NA
38	chr9	137387895	137387926	2	1.78144e-10	0.0150631	0.0924581	0.0886625	cg13758932	-	-	-	open sea	NA
38	chr9	137387895	137387926	2	1.78144e-10	0.0150631	0.0924581	0.0886625	cg14282531	-	-	-	open sea	NA
39	chr19	1152147	1152189	2	6.49237e-09	0.0154327	0.107697	0.10105	cg04271289	Body	SBNO2	-	island	NA
39	chr19	1152147	1152189	2	6.49237e-09	0.0154327	0.107697	0.10105	cg08438705	Body	SBNO2	-	island	NA
40	chr6	31090929	31091345	2	7.52721e-14	0.0159158	0.0858914	0.0139257	cg19456997	5'UTR	PSORS1C1	-	open sea	NA
40	chr6	31090929	31091345	2	7.52721e-14	0.0159158	0.0858914	0.0139257	cg22402850	5'UTR	PSORS1C1	-	open sea	NA
41	chr16	816650	817098	2	1.59865e-12	0.0161788	0.142616	0.115447	cg05971010	Body;Body	MSLN;MSLN	-	open sea	NA
41	chr16	816650	817098	2	1.59865e-12	0.0161788	0.142616	0.115447	cg08079266	Body;Body	MSLN;MSLN	-	open sea	NA
42	chr12	127209284	127209925	4	5.50029e-17	0.0163544	0.186587	0.105763	cg15054288	-	-	-	shore	NA
42	chr12	127209284	127209925	4	5.50029e-17	0.0163544	0.186587	0.105763	cg13135437	-	-	-	shore	NA
42	chr12	127209284	127209925	4	5.50029e-17	0.0163544	0.186587	0.105763	cg12400519	-	-	-	shore	NA
42	chr12	127209284	127209925	4	5.50029e-17	0.0163544	0.186587	0.105763	cg22686718	-	-	-	shore	NA
43	chr7	157306340	157306592	4	2.03888e-10	0.0164653	0.135174	0.115955	cg10235181	-	-	-	open sea	NA
43	chr7	157306340	157306592	4	2.03888e-10	0.0164653	0.135174	0.115955	cg10838683	-	-	-	open sea	NA
43	chr7	157306340	157306592	4	2.03888e-10	0.0164653	0.135174	0.115955	cg14095593	-	-	-	open sea	NA
43	chr7	157306340	157306592	4	2.03888e-10	0.0164653	0.135174	0.115955	cg25815421	-	-	-	open sea	NA
44	chr16	73100426	73100790	3	3.70285e-11	0.0170162	-0.0735483	-0.0590774	cg01744822	-	-	-	island	NA
44	chr16	73100426	73100790	3	3.70285e-11	0.0170162	-0.0735483	-0.0590774	cg06984903	-	-	-	island	NA
44	chr16	73100426	73100790	3	3.70285e-11	0.0170162	-0.0735483	-0.0590774	cg15712310	-	-	-	island	NA
45	chr8	144809598	144810034	3	3.04156e-11	0.0171171	0.163694	0.140075	cg07962934	Body	FAM83H	5mC	island	NA
45	chr8	144809598	144810034	3	3.04156e-11	0.0171171	0.163694	0.140075	cg01612292	Body	FAM83H	5mC	island	NA
45	chr8	144809598	144810034	3	3.04156e-11	0.0171171	0.163694	0.140075	cg25468618	Body	FAM83H	5mC	island	NA
46	chr8	102503892	102503970	3	1.15024e-09	0.0176057	0.0938003	0.0755795	cg05458052	TSS1500	GRHL2	-	shore	NA
46	chr8	102503892	102503970	3	1.15024e-09	0.0176057	0.0938003	0.0755795	cg17885542	TSS1500	GRHL2	-	shore	NA
46	chr8	102503892	102503970	3	1.15024e-09	0.0176057	0.0938003	0.0755795	cg20342184	TSS1500	GRHL2	-	shore	NA
47	chr22	24552379	24552594	2	4.69158e-10	0.0182647	-0.0430644	-0.0272655	cg03768513	Body	CABIN1	-	island	V$MEF2_02
48	chr14	105359836	105360327	4	1.19805e-10	0.0187468	0.328287	0.148206	cg10289790	Body;Body	KIAA0284;KIAA0284	5mC	island	NA
48	chr14	105359836	105360327	4	1.19805e-10	0.0187468	0.328287	0.148206	cg15297752	Body;Body	KIAA0284;KIAA0284	5mC	island	NA
48	chr14	105359836	105360327	4	1.19805e-10	0.0187468	0.328287	0.148206	cg11121935	Body;Body	KIAA0284;KIAA0284	5mC	island	NA
48	chr14	105359836	105360327	4	1.19805e-10	0.0187468	0.328287	0.148206	cg06887444	Body;Body	KIAA0284;KIAA0284	5mC	island	NA
48	chr14	105359836	105360327	4	1.19805e-10	0.0187468	0.328287	0.148206	cg25073967	Body;Body	KIAA0284;KIAA0284	5mC	shore	NA
49	chr5	140781179	140781193	2	9.74779e-10	0.0187468	0.178604	0.141762	cg26879386	Body;Body;Body;Body;Body;Body;Body;Body;Body;Body;Body;TSS1500;Body;TSS1500;Body	PCDHGA4;PCDHGA6;PCDHGA1;PCDHGA8;PCDHGA5;PCDHGB1;PCDHGB4;PCDHGA3;PCDHGA2;PCDHGA7;PCDHGB2;PCDHGA9;PCDHGB5;PCDHGA9;PCDHGB3	-	shore	NA
49	chr5	140781179	140781193	2	9.74779e-10	0.0187468	0.178604	0.141762	cg24921961	Body;Body;Body;Body;Body;Body;Body;Body;Body;Body;Body;TSS1500;Body;TSS1500;Body	PCDHGA4;PCDHGA6;PCDHGA1;PCDHGA8;PCDHGA5;PCDHGB1;PCDHGB4;PCDHGA3;PCDHGA2;PCDHGA7;PCDHGB2;PCDHGA9;PCDHGB5;PCDHGA9;PCDHGB3	-	shore	NA
50	chr6	168857542	168857803	3	1.16027e-09	0.0189296	0.129793	0.106555	cg13705956	Body;Body	SMOC2;SMOC2	5mC	open sea	NA
50	chr6	168857542	168857803	3	1.16027e-09	0.0189296	0.129793	0.106555	cg16588799	Body;Body	SMOC2;SMOC2	5mC	open sea	NA
50	chr6	168857542	168857803	3	1.16027e-09	0.0189296	0.129793	0.106555	cg16053651	Body;Body	SMOC2;SMOC2	5mC	open sea	NA
51	chr1	230414987	230415377	5	1.92315e-10	0.0192162	0.246575	0.118851	cg24591105	3'UTR	GALNT2	5mC	shore	NA
51	chr1	230414987	230415377	5	1.92315e-10	0.0192162	0.246575	0.118851	cg00589617	3'UTR	GALNT2	5mC	island	NA
51	chr1	230414987	230415377	5	1.92315e-10	0.0192162	0.246575	0.118851	cg05697274	3'UTR	GALNT2	5mC	island	NA
51	chr1	230414987	230415377	5	1.92315e-10	0.0192162	0.246575	0.118851	cg12723251	Body	GALNT2	5mC	shore	NA
51	chr1	230414987	230415377	5	1.92315e-10	0.0192162	0.246575	0.118851	cg19727396	Body	GALNT2	5mC	shore	V$AHR_01
52	chr20	25039658	25039812	5	1.47766e-11	0.0199381	0.196434	0.0782156	cg23676480	TSS200	ACSS1	-	shore	NA
52	chr20	25039658	25039812	5	1.47766e-11	0.0199381	0.196434	0.0782156	cg14810385	TSS200	ACSS1	-	shore	NA
52	chr20	25039658	25039812	5	1.47766e-11	0.0199381	0.196434	0.0782156	cg03321508	TSS200	ACSS1	-	shore	NA
52	chr20	25039658	25039812	5	1.47766e-11	0.0199381	0.196434	0.0782156	cg02086310	TSS200	ACSS1	-	shore	NA
52	chr20	25039658	25039812	5	1.47766e-11	0.0199381	0.196434	0.0782156	cg26325723	TSS200	ACSS1	-	shore	NA
53	chr11	528207	528653	4	2.89589e-18	0.0201731	0.172146	0.103252	cg21039438	-	-	5mC	open sea	NA
53	chr11	528207	528653	4	2.89589e-18	0.0201731	0.172146	0.103252	cg15343812	-	-	5mC	open sea	NA
53	chr11	528207	528653	4	2.89589e-18	0.0201731	0.172146	0.103252	cg13167353	-	-	5mC	open sea	NA
53	chr11	528207	528653	4	2.89589e-18	0.0201731	0.172146	0.103252	cg13226968	-	-	5mC	open sea	NA
54	chr16	4732369	4732406	2	7.92254e-09	0.0206605	0.211391	0.193107	cg03963853	Body;Body;Body;Body	MGRN1;MGRN1;MGRN1;MGRN1	5mC	island	NA
54	chr16	4732369	4732406	2	7.92254e-09	0.0206605	0.211391	0.193107	cg07248377	Body;Body;Body;Body	MGRN1;MGRN1;MGRN1;MGRN1	5mC	island	NA
55	chr17	79792997	79793795	8	3.16483e-10	0.0214796	0.129113	0.0617178	cg02408850	TSS1500	DYSFIP1	5mC	shore	NA
55	chr17	79792997	79793795	8	3.16483e-10	0.0214796	0.129113	0.0617178	cg12008350	TSS1500	DYSFIP1	5mC	shore	NA
55	chr17	79792997	79793795	8	3.16483e-10	0.0214796	0.129113	0.0617178	cg00666559	TSS1500	DYSFIP1	5mC	shore	NA
55	chr17	79792997	79793795	8	3.16483e-10	0.0214796	0.129113	0.0617178	cg03750525	TSS1500	DYSFIP1	5mC	shelf	NA
55	chr17	79792997	79793795	8	3.16483e-10	0.0214796	0.129113	0.0617178	cg21320221	TSS200	DYSFIP1	5mC	shore	NA
55	chr17	79792997	79793795	8	3.16483e-10	0.0214796	0.129113	0.0617178	cg23596678	TSS200	DYSFIP1	5mC	shore	NA
55	chr17	79792997	79793795	8	3.16483e-10	0.0214796	0.129113	0.0617178	cg24380489	TSS200	DYSFIP1	5mC	shore	NA
55	chr17	79792997	79793795	8	3.16483e-10	0.0214796	0.129113	0.0617178	cg02862897	TSS200	DYSFIP1	5mC	shore	NA
56	chr19	58280767	58281117	3	1.51548e-12	0.0216502	0.0599305	0.0122513	cg22956410	1stExon;5'UTR	ZNF586;ZNF586	-	island	NA
56	chr19	58280767	58281117	3	1.51548e-12	0.0216502	0.0599305	0.0122513	cg13382661	TSS1500	ZNF586	-	shore	NA
56	chr19	58280767	58281117	3	1.51548e-12	0.0216502	0.0599305	0.0122513	cg27046034	TSS1500	ZNF586	-	shore	NA
56	chr19	58280767	58281117	3	1.51548e-12	0.0216502	0.0599305	0.0122513	cg03584535	TSS200	ZNF586	-	shore	NA
56	chr19	58280767	58281117	3	1.51548e-12	0.0216502	0.0599305	0.0122513	cg07685728	TSS200	ZNF586	-	shore	NA
56	chr19	58280767	58281117	3	1.51548e-12	0.0216502	0.0599305	0.0122513	cg13636880	TSS200	ZNF586	-	island	NA
56	chr19	58280767	58281117	3	1.51548e-12	0.0216502	0.0599305	0.0122513	cg24298255	TSS200	ZNF586	-	island	NA
56	chr19	58280767	58281117	3	1.51548e-12	0.0216502	0.0599305	0.0122513	cg18575209	TSS200	ZNF586	-	island	NA
56	chr19	58280767	58281117	3	1.51548e-12	0.0216502	0.0599305	0.0122513	cg20751795	TSS200	ZNF586	-	island	NA
57	chr5	180048155	180048893	2	1.83049e-19	0.0218268	0.220985	0.164329	cg06077821	Body;Body	FLT4;FLT4	5mC	island	NA
57	chr5	180048155	180048893	2	1.83049e-19	0.0218268	0.220985	0.164329	cg18719563	Body;Body	FLT4;FLT4	5mC	island	NA
58	chr14	67981876	67982456	2	4.12462e-26	0.0224219	-0.0291523	-0.00171065	cg10153809	1stExon;5'UTR	TMEM229B;TMEM229B	-	island	NA
58	chr14	67981876	67982456	2	4.12462e-26	0.0224219	-0.0291523	-0.00171065	cg20454158	TSS1500	TMEM229B	-	shore	NA
58	chr14	67981876	67982456	2	4.12462e-26	0.0224219	-0.0291523	-0.00171065	cg25006823	TSS1500	TMEM229B	-	shore	NA
58	chr14	67981876	67982456	2	4.12462e-26	0.0224219	-0.0291523	-0.00171065	cg27086024	TSS200	TMEM229B	-	island	NA
58	chr14	67981876	67982456	2	4.12462e-26	0.0224219	-0.0291523	-0.00171065	cg10188299	TSS200	TMEM229B	-	island	NA
58	chr14	67981876	67982456	2	4.12462e-26	0.0224219	-0.0291523	-0.00171065	cg10484450	TSS200	TMEM229B	-	island	NA
58	chr14	67981876	67982456	2	4.12462e-26	0.0224219	-0.0291523	-0.00171065	cg01215356	TSS200	TMEM229B	-	island	NA
58	chr14	67981876	67982456	2	4.12462e-26	0.0224219	-0.0291523	-0.00171065	cg18484507	TSS200	TMEM229B	-	island	NA
58	chr14	67981876	67982456	2	4.12462e-26	0.0224219	-0.0291523	-0.00171065	cg02032696	TSS200	TMEM229B	-	island	NA
59	chr9	134405925	134406048	2	9.30573e-11	0.0234401	-0.0363216	-0.0271152	cg12894126	Body;Body	UCK1;UCK1	-	shore	NA
59	chr9	134405925	134406048	2	9.30573e-11	0.0234401	-0.0363216	-0.0271152	cg00149830	Body;Body	UCK1;UCK1	-	island	NA
60	chr11	117947214	117947877	6	3.03342e-11	0.0244697	0.1247	0.0782916	cg26118131	TSS1500;TSS1500	TMPRSS4;TMPRSS4	5mC	open sea	NA
60	chr11	117947214	117947877	6	3.03342e-11	0.0244697	0.1247	0.0782916	cg13159318	TSS1500;TSS1500	TMPRSS4;TMPRSS4	5mC	open sea	NA
60	chr11	117947214	117947877	6	3.03342e-11	0.0244697	0.1247	0.0782916	cg05775918	TSS200;TSS200	TMPRSS4;TMPRSS4	5mC	open sea	NA
60	chr11	117947214	117947877	6	3.03342e-11	0.0244697	0.1247	0.0782916	cg22957898	5'UTR;1stExon;1stExon;5'UTR	TMPRSS4;TMPRSS4;TMPRSS4;TMPRSS4	-	open sea	V$HNF4_01
60	chr11	117947214	117947877	6	3.03342e-11	0.0244697	0.1247	0.0782916	cg27300950	TSS200;TSS200	TMPRSS4;TMPRSS4	-	open sea	NA
60	chr11	117947214	117947877	6	3.03342e-11	0.0244697	0.1247	0.0782916	cg03634928	TSS200;TSS200	TMPRSS4;TMPRSS4	-	open sea	V$PAX6_01
60	chr11	117947214	117947877	6	3.03342e-11	0.0244697	0.1247	0.0782916	cg25116503	TSS200;TSS200	TMPRSS4;TMPRSS4	-	open sea	NA
61	chr4	107237991	107238104	2	7.56775e-09	0.0251715	-0.0482412	-0.0121076	cg25072643	5'UTR;TSS1500;Body;TSS1500;5'UTR;TSS1500;TSS1500	AIMP1;TBCK;AIMP1;TBCK;AIMP1;TBCK;TBCK	-	open sea	NA
61	chr4	107237991	107238104	2	7.56775e-09	0.0251715	-0.0482412	-0.0121076	cg20061689	TSS200;5'UTR;TSS1500;Body;TSS1500;5'UTR;TSS1500	TBCK;AIMP1;TBCK;AIMP1;TBCK;AIMP1;TBCK	-	open sea	NA
61	chr4	107237991	107238104	2	7.56775e-09	0.0251715	-0.0482412	-0.0121076	cg00622204	TSS200;5'UTR;TSS1500;Body;TSS1500;5'UTR;TSS1500	TBCK;AIMP1;TBCK;AIMP1;TBCK;AIMP1;TBCK	-	open sea	NA
62	chr7	157890968	157891327	2	1.90545e-18	0.0259221	0.126044	0.124798	cg07879612	Body;Body;Body	PTPRN2;PTPRN2;PTPRN2	5mC	island	NA
62	chr7	157890968	157891327	2	1.90545e-18	0.0259221	0.126044	0.124798	cg11053171	Body;Body;Body	PTPRN2;PTPRN2;PTPRN2	5mC	island	NA
63	chr16	88949367	88949636	2	1.39578e-16	0.0267718	0.189309	0.112399	cg02216032	Body;Body	CBFA2T3;CBFA2T3	5mC	shore	NA
63	chr16	88949367	88949636	2	1.39578e-16	0.0267718	0.189309	0.112399	cg00402956	Body;Body	CBFA2T3;CBFA2T3	5mC	shore	NA
64	chr10	71177158	71177172	3	1.63026e-10	0.0269386	0.147298	0.0887445	cg18675128	TSS1500	TACR2	5mC	open sea	NA
64	chr10	71177158	71177172	3	1.63026e-10	0.0269386	0.147298	0.0887445	cg02303677	TSS1500	TACR2	5mC	open sea	NA
64	chr10	71177158	71177172	3	1.63026e-10	0.0269386	0.147298	0.0887445	cg26866174	TSS1500	TACR2	5mC	open sea	NA
65	chr11	62414563	62415024	4	1.1446e-09	0.027182	0.104038	0.0290991	cg12954619	TSS1500;TSS1500;Body	GANAB;GANAB;INTS5	5mC	shore	NA
65	chr11	62414563	62415024	4	1.1446e-09	0.027182	0.104038	0.0290991	cg16260700	TSS1500;TSS1500;Body	GANAB;GANAB;INTS5	5mC	shore	NA
65	chr11	62414563	62415024	4	1.1446e-09	0.027182	0.104038	0.0290991	cg23508264	TSS1500;TSS1500;Body	GANAB;GANAB;INTS5	5mC	shore	NA
65	chr11	62414563	62415024	4	1.1446e-09	0.027182	0.104038	0.0290991	cg05962404	TSS1500;TSS1500;Body	GANAB;GANAB;INTS5	-	shore	V$CDPCR1_01
66	chr17	81031249	81032067	3	1.50803e-13	0.0280666	-0.105376	0.0160677	cg25162533	-	-	5mC	shore	NA
66	chr17	81031249	81032067	3	1.50803e-13	0.0280666	-0.105376	0.0160677	cg24278841	-	-	-	shore	NA
66	chr17	81031249	81032067	3	1.50803e-13	0.0280666	-0.105376	0.0160677	cg18413830	-	-	-	shore	NA
66	chr17	81031249	81032067	3	1.50803e-13	0.0280666	-0.105376	0.0160677	cg18104015	-	-	-	shore	NA
67	chr5	125695473	125695699	3	4.20658e-09	0.0281005	0.108558	-0.00017756	cg26107055	TSS200	GRAMD3	-	open sea	NA
67	chr5	125695473	125695699	3	4.20658e-09	0.0281005	0.108558	-0.00017756	cg25426716	TSS200	GRAMD3	-	open sea	NA
68	chr7	36339004	36339405	3	6.6017e-12	0.0286261	0.138215	0.0804736	cg18045658	3'UTR	EEPD1	-	open sea	NA
68	chr7	36339004	36339405	3	6.6017e-12	0.0286261	0.138215	0.0804736	cg02734419	3'UTR	EEPD1	-	open sea	NA
68	chr7	36339004	36339405	3	6.6017e-12	0.0286261	0.138215	0.0804736	cg01449168	3'UTR	EEPD1	-	open sea	NA
69	chr12	107974186	107974897	8	4.33941e-12	0.0289744	0.128794	0.0645423	cg27567561	Body;1stExon	BTBD11;BTBD11	-	shore	NA
69	chr12	107974186	107974897	8	4.33941e-12	0.0289744	0.128794	0.0645423	cg13935577	Body;Body	BTBD11;BTBD11	-	island	NA
69	chr12	107974186	107974897	8	4.33941e-12	0.0289744	0.128794	0.0645423	cg05649374	TSS1500;Body	BTBD11;BTBD11	-	shore	NA
69	chr12	107974186	107974897	8	4.33941e-12	0.0289744	0.128794	0.0645423	cg21500895	TSS1500;Body	BTBD11;BTBD11	-	shore	NA
69	chr12	107974186	107974897	8	4.33941e-12	0.0289744	0.128794	0.0645423	cg11711057	TSS200;Body	BTBD11;BTBD11	-	shore	NA
69	chr12	107974186	107974897	8	4.33941e-12	0.0289744	0.128794	0.0645423	cg21757872	TSS200;Body	BTBD11;BTBD11	-	shore	NA
69	chr12	107974186	107974897	8	4.33941e-12	0.0289744	0.128794	0.0645423	cg27662246	TSS200;Body	BTBD11;BTBD11	-	shore	NA
69	chr12	107974186	107974897	8	4.33941e-12	0.0289744	0.128794	0.0645423	cg00530688	TSS200;Body	BTBD11;BTBD11	-	shore	NA
69	chr12	107974186	107974897	8	4.33941e-12	0.0289744	0.128794	0.0645423	cg14141102	TSS200;Body	BTBD11;BTBD11	-	shore	NA
69	chr12	107974186	107974897	8	4.33941e-12	0.0289744	0.128794	0.0645423	cg21535366	TSS200;Body	BTBD11;BTBD11	-	shore	NA
70	chr4	657536	657927	3	6.5448e-11	0.0290594	-0.0401239	-0.029219	cg14470398	Body;Body;Body	PDE6B;PDE6B;PDE6B	-	island	NA
70	chr4	657536	657927	3	6.5448e-11	0.0290594	-0.0401239	-0.029219	cg17035770	Body;Body;Body	PDE6B;PDE6B;PDE6B	-	island	NA
70	chr4	657536	657927	3	6.5448e-11	0.0290594	-0.0401239	-0.029219	cg04722722	Body;Body;Body	PDE6B;PDE6B;PDE6B	-	island	NA
70	chr4	657536	657927	3	6.5448e-11	0.0290594	-0.0401239	-0.029219	cg14226747	Body;Body;Body	PDE6B;PDE6B;PDE6B	-	island	NA
71	chr16	7364246	7364322	2	6.42602e-09	0.0293482	0.199862	0.147836	cg02236847	Body;Body;Body	A2BP1;A2BP1;A2BP1	-	open sea	NA
71	chr16	7364246	7364322	2	6.42602e-09	0.0293482	0.199862	0.147836	cg16696400	Body;Body;Body	A2BP1;A2BP1;A2BP1	-	open sea	NA
72	chr3	195552341	195552429	2	3.21231e-09	0.0304133	0.105771	0.0818873	cg20710258	-	-	-	open sea	NA
72	chr3	195552341	195552429	2	3.21231e-09	0.0304133	0.105771	0.0818873	cg12739914	-	-	-	open sea	NA
73	chr2	242766284	242766567	3	9.3731e-10	0.0309785	0.161899	0.113887	cg19384073	-	-	-	island	NA
73	chr2	242766284	242766567	3	9.3731e-10	0.0309785	0.161899	0.113887	cg16514818	-	-	-	island	NA
73	chr2	242766284	242766567	3	9.3731e-10	0.0309785	0.161899	0.113887	cg14175617	-	-	-	island	NA
74	chr12	132923339	132923603	4	2.07002e-11	0.0314494	0.144537	0.0897006	cg17270519	-	-	-	shore	NA
74	chr12	132923339	132923603	4	2.07002e-11	0.0314494	0.144537	0.0897006	cg01052701	-	-	-	shore	NA
74	chr12	132923339	132923603	4	2.07002e-11	0.0314494	0.144537	0.0897006	cg14907262	-	-	-	shore	NA
74	chr12	132923339	132923603	4	2.07002e-11	0.0314494	0.144537	0.0897006	cg02467451	-	-	-	shore	NA
75	chr22	20192371	20192485	2	1.06577e-09	0.0315238	0.193953	0.141848	cg05389174	TSS1500	LOC150197	-	open sea	NA
75	chr22	20192371	20192485	2	1.06577e-09	0.0315238	0.193953	0.141848	cg12743638	TSS1500	LOC150197	-	open sea	NA
76	chr9	136443547	136443584	2	1.08487e-10	0.0319339	0.150382	0.112066	cg13908632	-	-	-	shore	NA
76	chr9	136443547	136443584	2	1.08487e-10	0.0319339	0.150382	0.112066	cg00473702	-	-	-	shore	NA
77	chr5	3181925	3182057	2	2.13311e-12	0.0322861	-0.0330977	-0.00782273	cg18894214	-	-	-	open sea	NA
77	chr5	3181925	3182057	2	2.13311e-12	0.0322861	-0.0330977	-0.00782273	cg06976144	-	-	-	open sea	NA
78	chr17	26926511	26926868	2	9.9807e-12	0.032651	-0.0498024	-0.00633845	cg06329022	TSS1500	SPAG5	-	island	NA
78	chr17	26926511	26926868	2	9.9807e-12	0.032651	-0.0498024	-0.00633845	cg08062469	TSS1500	SPAG5	-	shore	NA
78	chr17	26926511	26926868	2	9.9807e-12	0.032651	-0.0498024	-0.00633845	cg06803850	TSS1500	SPAG5	-	shore	NA
78	chr17	26926511	26926868	2	9.9807e-12	0.032651	-0.0498024	-0.00633845	cg17960080	TSS1500	SPAG5	-	shore	NA
79	chr1	53924389	53926112	9	3.33571e-32	0.0327338	0.111225	0.0550788	cg16252727	1stExon	DMRTB1	5mC	island	NA
79	chr1	53924389	53926112	9	3.33571e-32	0.0327338	0.111225	0.0550788	cg07220007	Body	DMRTB1	5mC	island	NA
79	chr1	53924389	53926112	9	3.33571e-32	0.0327338	0.111225	0.0550788	cg05885647	Body	DMRTB1	5mC	island	NA
79	chr1	53924389	53926112	9	3.33571e-32	0.0327338	0.111225	0.0550788	cg07203271	Body	DMRTB1	5mC	island	NA
79	chr1	53924389	53926112	9	3.33571e-32	0.0327338	0.111225	0.0550788	cg17736259	1stExon	DMRTB1	-	shore	NA
79	chr1	53924389	53926112	9	3.33571e-32	0.0327338	0.111225	0.0550788	cg09254853	1stExon	DMRTB1	-	island	NA
79	chr1	53924389	53926112	9	3.33571e-32	0.0327338	0.111225	0.0550788	cg10130718	1stExon	DMRTB1	-	island	NA
79	chr1	53924389	53926112	9	3.33571e-32	0.0327338	0.111225	0.0550788	cg07149641	5'UTR;1stExon	DMRTB1;DMRTB1	-	shore	NA
79	chr1	53924389	53926112	9	3.33571e-32	0.0327338	0.111225	0.0550788	cg10818160	TSS1500	DMRTB1	-	shore	NA
79	chr1	53924389	53926112	9	3.33571e-32	0.0327338	0.111225	0.0550788	cg00008810	TSS1500	DMRTB1	-	shore	NA
79	chr1	53924389	53926112	9	3.33571e-32	0.0327338	0.111225	0.0550788	cg00578363	TSS200	DMRTB1	-	shore	NA
79	chr1	53924389	53926112	9	3.33571e-32	0.0327338	0.111225	0.0550788	cg24845207	TSS200	DMRTB1	-	shore	NA
80	chr19	15512044	15512550	3	4.27985e-12	0.0328246	0.182345	0.117449	cg10754777	Body	AKAP8L	5mC	island	NA
80	chr19	15512044	15512550	3	4.27985e-12	0.0328246	0.182345	0.117449	cg27393769	Body	AKAP8L	5mC	island	NA
80	chr19	15512044	15512550	3	4.27985e-12	0.0328246	0.182345	0.117449	cg00022594	Body	AKAP8L	5mC	shore	NA
81	chr12	51236582	51236768	4	5.99116e-13	0.0331977	-0.103352	0.0100378	cg12439325	1stExon	TMPRSS12	-	island	NA
81	chr12	51236582	51236768	4	5.99116e-13	0.0331977	-0.103352	0.0100378	cg01020079	1stExon;5'UTR	TMPRSS12;TMPRSS12	-	island	NA
81	chr12	51236582	51236768	4	5.99116e-13	0.0331977	-0.103352	0.0100378	cg02956274	TSS200	TMPRSS12	-	shore	NA
81	chr12	51236582	51236768	4	5.99116e-13	0.0331977	-0.103352	0.0100378	cg25213362	TSS200	TMPRSS12	-	island	NA
81	chr12	51236582	51236768	4	5.99116e-13	0.0331977	-0.103352	0.0100378	cg27261219	TSS200	TMPRSS12	-	island	NA
81	chr12	51236582	51236768	4	5.99116e-13	0.0331977	-0.103352	0.0100378	cg15169829	TSS200	TMPRSS12	-	island	NA
82	chr8	57358130	57358928	6	8.42001e-11	0.0345035	-0.0596341	-0.0252965	cg21694941	5'UTR;5'UTR;1stExon	PENK;PENK;PENK	-	island	NA
82	chr8	57358130	57358928	6	8.42001e-11	0.0345035	-0.0596341	-0.0252965	cg03483150	5'UTR;TSS200	PENK;PENK	-	island	NA
82	chr8	57358130	57358928	6	8.42001e-11	0.0345035	-0.0596341	-0.0252965	cg04612444	5'UTR;TSS200	PENK;PENK	-	island	NA
82	chr8	57358130	57358928	6	8.42001e-11	0.0345035	-0.0596341	-0.0252965	cg04598121	Body;1stExon	PENK;PENK	-	island	NA
82	chr8	57358130	57358928	6	8.42001e-11	0.0345035	-0.0596341	-0.0252965	cg04127342	Body;Body	PENK;PENK	-	island	NA
82	chr8	57358130	57358928	6	8.42001e-11	0.0345035	-0.0596341	-0.0252965	cg22848150	Body;Body	PENK;PENK	-	island	NA
82	chr8	57358130	57358928	6	8.42001e-11	0.0345035	-0.0596341	-0.0252965	cg19414741	Body;Body	PENK;PENK	-	island	NA
82	chr8	57358130	57358928	6	8.42001e-11	0.0345035	-0.0596341	-0.0252965	cg12877723	Body;Body	PENK;PENK	-	island	NA
82	chr8	57358130	57358928	6	8.42001e-11	0.0345035	-0.0596341	-0.0252965	cg24645221	TSS1500;5'UTR	PENK;PENK	-	island	NA
83	chr3	13083151	13083477	3	8.01767e-10	0.035222	0.130478	0.10363	cg21831975	Body	IQSEC1	-	open sea	NA
83	chr3	13083151	13083477	3	8.01767e-10	0.035222	0.130478	0.10363	cg09886336	Body	IQSEC1	-	open sea	NA
83	chr3	13083151	13083477	3	8.01767e-10	0.035222	0.130478	0.10363	cg08099661	Body	IQSEC1	-	open sea	NA
84	chr7	5520933	5521614	4	2.40809e-10	0.0353928	0.12055	0.0809611	cg16554627	3'UTR	FBXL18	5mC	shore	NA
84	chr7	5520933	5521614	4	2.40809e-10	0.0353928	0.12055	0.0809611	cg04784014	3'UTR	FBXL18	5mC	shore	NA
84	chr7	5520933	5521614	4	2.40809e-10	0.0353928	0.12055	0.0809611	cg04305325	Body	FBXL18	5mC	island	NA
84	chr7	5520933	5521614	4	2.40809e-10	0.0353928	0.12055	0.0809611	cg02356002	Body	FBXL18	5mC	island	NA
84	chr7	5520933	5521614	4	2.40809e-10	0.0353928	0.12055	0.0809611	cg11155002	Body	FBXL18	5mC	island	NA
85	chr7	157502370	157502620	4	1.84035e-14	0.035766	0.130995	0.0846124	cg13816552	Body;Body;Body	PTPRN2;PTPRN2;PTPRN2	5mC	shore	NA
85	chr7	157502370	157502620	4	1.84035e-14	0.035766	0.130995	0.0846124	cg13401196	Body;Body;Body	PTPRN2;PTPRN2;PTPRN2	5mC	shore	NA
85	chr7	157502370	157502620	4	1.84035e-14	0.035766	0.130995	0.0846124	cg11340881	Body;Body;Body	PTPRN2;PTPRN2;PTPRN2	5mC	shore	NA
85	chr7	157502370	157502620	4	1.84035e-14	0.035766	0.130995	0.0846124	cg00231927	Body;Body;Body	PTPRN2;PTPRN2;PTPRN2	5mC	shore	NA
86	chr14	101235945	101236070	2	3.88494e-09	0.0359677	0.13099	0.129528	cg16562127	-	-	-	open sea	NA
86	chr14	101235945	101236070	2	3.88494e-09	0.0359677	0.13099	0.129528	cg18603483	-	-	-	open sea	NA
87	chr22	49637702	49637880	2	6.21939e-11	0.0382151	0.188775	0.114399	cg20715885	-	-	-	island	NA
87	chr22	49637702	49637880	2	6.21939e-11	0.0382151	0.188775	0.114399	cg23236325	-	-	-	island	NA
88	chr15	62537760	62537934	4	1.14949e-09	0.0387607	0.106968	0.0490154	cg03608502	-	-	-	open sea	NA
88	chr15	62537760	62537934	4	1.14949e-09	0.0387607	0.106968	0.0490154	cg13175736	-	-	-	open sea	NA
88	chr15	62537760	62537934	4	1.14949e-09	0.0387607	0.106968	0.0490154	cg06136125	-	-	-	open sea	NA
88	chr15	62537760	62537934	4	1.14949e-09	0.0387607	0.106968	0.0490154	cg23066057	-	-	-	open sea	NA
89	chr2	227288518	227288863	2	4.67334e-12	0.0397732	0.139088	0.0829652	cg18864124	-	-	-	open sea	NA
89	chr2	227288518	227288863	2	4.67334e-12	0.0397732	0.139088	0.0829652	cg05209518	-	-	-	open sea	NA
90	chr17	79799358	79799549	4	7.56036e-13	0.0410786	0.133855	0.106639	cg27316369	-	-	-	island	NA
90	chr17	79799358	79799549	4	7.56036e-13	0.0410786	0.133855	0.106639	cg13480197	-	-	-	island	NA
90	chr17	79799358	79799549	4	7.56036e-13	0.0410786	0.133855	0.106639	cg27039898	-	-	-	island	NA
90	chr17	79799358	79799549	4	7.56036e-13	0.0410786	0.133855	0.106639	cg00469771	-	-	-	island	NA
90	chr17	79799358	79799549	4	7.56036e-13	0.0410786	0.133855	0.106639	cg26985878	-	-	-	island	NA
91	chr22	25615317	25615557	7	4.31908e-10	0.0422486	0.207689	0.117899	cg26239816	TSS1500	CRYBB2	-	open sea	NA
91	chr22	25615317	25615557	7	4.31908e-10	0.0422486	0.207689	0.117899	cg25497487	TSS1500	CRYBB2	-	open sea	NA
91	chr22	25615317	25615557	7	4.31908e-10	0.0422486	0.207689	0.117899	cg12652953	TSS200	CRYBB2	-	open sea	NA
91	chr22	25615317	25615557	7	4.31908e-10	0.0422486	0.207689	0.117899	cg23803431	TSS200	CRYBB2	-	open sea	NA
91	chr22	25615317	25615557	7	4.31908e-10	0.0422486	0.207689	0.117899	cg19025573	TSS200	CRYBB2	-	open sea	NA
91	chr22	25615317	25615557	7	4.31908e-10	0.0422486	0.207689	0.117899	cg09680055	TSS200	CRYBB2	-	open sea	NA
91	chr22	25615317	25615557	7	4.31908e-10	0.0422486	0.207689	0.117899	cg23035923	TSS200	CRYBB2	-	open sea	NA
92	chr10	128593624	128594417	4	2.2681e-18	0.0424972	-0.0292824	-0.0121352	cg18932726	Body	DOCK1	-	island	NA
92	chr10	128593624	128594417	4	2.2681e-18	0.0424972	-0.0292824	-0.0121352	cg05608777	Body	DOCK1	-	island	NA
92	chr10	128593624	128594417	4	2.2681e-18	0.0424972	-0.0292824	-0.0121352	cg11793631	Body	DOCK1	-	island	NA
92	chr10	128593624	128594417	4	2.2681e-18	0.0424972	-0.0292824	-0.0121352	cg05858607	TSS1500	DOCK1	-	island	NA
92	chr10	128593624	128594417	4	2.2681e-18	0.0424972	-0.0292824	-0.0121352	cg00622654	TSS1500	DOCK1	-	island	NA
92	chr10	128593624	128594417	4	2.2681e-18	0.0424972	-0.0292824	-0.0121352	cg06128198	TSS200	DOCK1	-	island	NA
92	chr10	128593624	128594417	4	2.2681e-18	0.0424972	-0.0292824	-0.0121352	cg22665692	TSS200	DOCK1	-	island	NA
92	chr10	128593624	128594417	4	2.2681e-18	0.0424972	-0.0292824	-0.0121352	cg23665778	TSS200	DOCK1	-	island	NA
93	chr22	50644361	50645200	6	6.67674e-20	0.043326	0.256254	0.0933391	cg25934700	Body	SELO	5mC	island	NA
93	chr22	50644361	50645200	6	6.67674e-20	0.043326	0.256254	0.0933391	cg10201084	Body	SELO	5mC	shore	NA
93	chr22	50644361	50645200	6	6.67674e-20	0.043326	0.256254	0.0933391	cg07366553	Body	SELO	5mC	shore	NA
93	chr22	50644361	50645200	6	6.67674e-20	0.043326	0.256254	0.0933391	cg21874862	Body	SELO	5mC	island	NA
93	chr22	50644361	50645200	6	6.67674e-20	0.043326	0.256254	0.0933391	cg16919420	Body	SELO	5mC	island	V$PAX2_01;V$HTF_01;V$XBP1_01
93	chr22	50644361	50645200	6	6.67674e-20	0.043326	0.256254	0.0933391	cg24993400	Body	SELO	5mC	shore	NA
94	chr1	2310084	2310327	3	6.21954e-12	0.0439794	0.130212	0.0766078	cg07087919	Body	MORN1	-	open sea	NA
94	chr1	2310084	2310327	3	6.21954e-12	0.0439794	0.130212	0.0766078	cg10376814	Body	MORN1	-	open sea	NA
94	chr1	2310084	2310327	3	6.21954e-12	0.0439794	0.130212	0.0766078	cg13864546	Body	MORN1	-	open sea	NA
95	chr11	46741299	46741405	3	1.58388e-12	0.0469139	0.190888	0.0738682	cg09004691	Body	F2	5mC	open sea	NA
95	chr11	46741299	46741405	3	1.58388e-12	0.0469139	0.190888	0.0738682	cg13527922	Body	F2	5mC	open sea	NA
96	chr6	30483837	30483923	5	8.13834e-09	0.0471543	-0.0562843	-0.0312268	cg22765426	-	-	-	open sea	NA
96	chr6	30483837	30483923	5	8.13834e-09	0.0471543	-0.0562843	-0.0312268	cg03585731	-	-	-	open sea	NA
96	chr6	30483837	30483923	5	8.13834e-09	0.0471543	-0.0562843	-0.0312268	cg10830822	-	-	-	open sea	NA
96	chr6	30483837	30483923	5	8.13834e-09	0.0471543	-0.0562843	-0.0312268	cg16013925	-	-	-	open sea	NA
96	chr6	30483837	30483923	5	8.13834e-09	0.0471543	-0.0562843	-0.0312268	cg22410026	-	-	-	open sea	NA
97	chr10	134895031	134896232	3	3.37883e-16	0.0471906	0.151331	0.11177	cg14503168	-	-	5mC	shore	NA
97	chr10	134895031	134896232	3	3.37883e-16	0.0471906	0.151331	0.11177	cg11028710	-	-	5mC	shore	NA
97	chr10	134895031	134896232	3	3.37883e-16	0.0471906	0.151331	0.11177	cg19336811	-	-	-	shore	NA
98	chr11	472782	472948	2	9.18613e-09	0.0473101	0.0905324	0.079117	cg08063418	Body	PTDSS2	-	island	NA
98	chr11	472782	472948	2	9.18613e-09	0.0473101	0.0905324	0.079117	cg00593699	Body	PTDSS2	-	island	NA
99	chr16	1449308	1449479	3	1.96223e-09	0.0478457	0.120994	0.068558	cg08424513	Body	UNKL	-	island	NA
99	chr16	1449308	1449479	3	1.96223e-09	0.0478457	0.120994	0.068558	cg08246323	Body	UNKL	-	island	NA
99	chr16	1449308	1449479	3	1.96223e-09	0.0478457	0.120994	0.068558	cg26443922	Body	UNKL	-	island	NA
100	chr19	49054908	49055443	8	2.79301e-15	0.0497393	0.132675	0.0525862	cg08151612	1stExon;5'UTR	SULT2B1;SULT2B1	5mC	open sea	NA
100	chr19	49054908	49055443	8	2.79301e-15	0.0497393	0.132675	0.0525862	cg07543967	1stExon;5'UTR	SULT2B1;SULT2B1	5mC	open sea	V$AREB6_03
100	chr19	49054908	49055443	8	2.79301e-15	0.0497393	0.132675	0.0525862	cg00698688	1stExon;5'UTR	SULT2B1;SULT2B1	5mC	open sea	NA
100	chr19	49054908	49055443	8	2.79301e-15	0.0497393	0.132675	0.0525862	cg12250421	TSS1500	SULT2B1	5mC	open sea	NA
100	chr19	49054908	49055443	8	2.79301e-15	0.0497393	0.132675	0.0525862	cg15149098	TSS1500	SULT2B1	5mC	open sea	NA
100	chr19	49054908	49055443	8	2.79301e-15	0.0497393	0.132675	0.0525862	cg03039843	TSS200	SULT2B1	5mC	open sea	NA
100	chr19	49054908	49055443	8	2.79301e-15	0.0497393	0.132675	0.0525862	cg23097961	TSS200	SULT2B1	5mC	open sea	NA
100	chr19	49054908	49055443	8	2.79301e-15	0.0497393	0.132675	0.0525862	cg18549547	TSS1500	SULT2B1	-	open sea	NA
101	chr15	43512998	43513055	2	1.60359e-09	0.05023	0.207329	0.123728	cg24485332	1stExon;5'UTR;1stExon;5'UTR	EPB42;EPB42;EPB42;EPB42	-	open sea	NA
101	chr15	43512998	43513055	2	1.60359e-09	0.05023	0.207329	0.123728	cg22680812	1stExon;Body	EPB42;EPB42	-	open sea	NA
102	chr1	196619631	196619732	2	8.18625e-24	0.0506306	0.29203	0.141629	cg27331828	TSS1500;TSS1500	CFH;CFH	-	open sea	NA
102	chr1	196619631	196619732	2	8.18625e-24	0.0506306	0.29203	0.141629	cg18436810	TSS1500;TSS1500	CFH;CFH	-	open sea	NA
103	chr5	75380987	75381070	2	4.02227e-11	0.051477	0.0963564	0.0604868	cg18877252	5'UTR	SV2C	-	shore	NA
103	chr5	75380987	75381070	2	4.02227e-11	0.051477	0.0963564	0.0604868	cg18891924	5'UTR	SV2C	-	shore	NA
104	chr1	2918526	2918612	2	2.87192e-10	0.0535964	0.124024	0.0888801	cg22517653	-	-	-	island	NA
104	chr1	2918526	2918612	2	2.87192e-10	0.0535964	0.124024	0.0888801	cg00830435	-	-	-	island	NA
105	chr13	113783470	113784438	3	5.6125e-18	0.0550623	0.285234	0.0868924	cg07465431	Body	F10	-	island	NA
105	chr13	113783470	113784438	3	5.6125e-18	0.0550623	0.285234	0.0868924	cg10580951	Body	F10	-	shore	NA
105	chr13	113783470	113784438	3	5.6125e-18	0.0550623	0.285234	0.0868924	cg23389023	Body	F10	-	island	NA
105	chr13	113783470	113784438	3	5.6125e-18	0.0550623	0.285234	0.0868924	cg21860560	Body	F10	-	island	NA
106	chr12	97884975	97885729	5	2.14506e-11	0.0554559	-0.208115	-0.0883339	cg03415518	Body;Body	RMST;MIR1251	-	open sea	NA
106	chr12	97884975	97885729	5	2.14506e-11	0.0554559	-0.208115	-0.0883339	cg17967602	Body;TSS1500	RMST;MIR1251	-	open sea	NA
106	chr12	97884975	97885729	5	2.14506e-11	0.0554559	-0.208115	-0.0883339	cg27533635	Body;TSS1500	RMST;MIR1251	-	open sea	NA
106	chr12	97884975	97885729	5	2.14506e-11	0.0554559	-0.208115	-0.0883339	cg00030523	Body;TSS1500	RMST;MIR1251	-	open sea	NA
106	chr12	97884975	97885729	5	2.14506e-11	0.0554559	-0.208115	-0.0883339	cg04663692	Body;TSS200	RMST;MIR1251	-	open sea	NA
106	chr12	97884975	97885729	5	2.14506e-11	0.0554559	-0.208115	-0.0883339	cg19702383	Body;TSS200	RMST;MIR1251	-	open sea	NA
107	chr11	1008290	1008337	2	2.13418e-09	0.0564127	0.098889	0.0877355	cg25073705	Body	AP2A2	5mC	island	NA
107	chr11	1008290	1008337	2	2.13418e-09	0.0564127	0.098889	0.0877355	cg19851113	Body	AP2A2	5mC	island	NA
108	chr10	38644675	38645113	2	1.32428e-19	0.0566312	-0.0563456	-0.0018736	cg26499232	TSS1500	HSD17B7P2	-	shore	NA
108	chr10	38644675	38645113	2	1.32428e-19	0.0566312	-0.0563456	-0.0018736	cg17219203	TSS200	HSD17B7P2	-	island	NA
109	chr11	70557445	70557693	4	2.30103e-10	0.0569233	0.0702008	0.0374872	cg16516712	Body	SHANK2	-	open sea	NA
109	chr11	70557445	70557693	4	2.30103e-10	0.0569233	0.0702008	0.0374872	cg23055735	Body	SHANK2	-	open sea	NA
109	chr11	70557445	70557693	4	2.30103e-10	0.0569233	0.0702008	0.0374872	cg11833293	Body	SHANK2	-	open sea	NA
109	chr11	70557445	70557693	4	2.30103e-10	0.0569233	0.0702008	0.0374872	cg15418783	Body	SHANK2	-	open sea	NA
110	chr1	160340708	160340774	2	5.17946e-09	0.0571649	0.0943775	0.075885	cg26875665	Body	NHLH1	-	island	NA
110	chr1	160340708	160340774	2	5.17946e-09	0.0571649	0.0943775	0.075885	cg21538190	Body	NHLH1	-	island	V$PAX2_01
111	chr12	133000171	133000383	3	5.39767e-09	0.057166	-0.121029	-0.0633754	cg22977246	-	-	-	island	NA
111	chr12	133000171	133000383	3	5.39767e-09	0.057166	-0.121029	-0.0633754	cg09698465	-	-	-	island	NA
111	chr12	133000171	133000383	3	5.39767e-09	0.057166	-0.121029	-0.0633754	cg07775468	-	-	-	shore	NA
111	chr12	133000171	133000383	3	5.39767e-09	0.057166	-0.121029	-0.0633754	cg15962965	-	-	-	shore	NA
112	chr3	46395191	46395356	2	5.53182e-09	0.0582294	-0.107872	-0.0784245	cg04110105	5'UTR;1stExon;1stExon;5'UTR	CCR2;CCR2;CCR2;CCR2	-	open sea	NA
112	chr3	46395191	46395356	2	5.53182e-09	0.0582294	-0.107872	-0.0784245	cg03928384	TSS200;TSS200	CCR2;CCR2	-	open sea	NA
113	chr3	108836693	108837620	9	3.64037e-14	0.05861	0.200302	0.0710338	cg05148217	1stExon	MORC1	5mC	island	NA
113	chr3	108836693	108837620	9	3.64037e-14	0.05861	0.200302	0.0710338	cg23550947	1stExon;5'UTR	MORC1;MORC1	5mC	island	NA
113	chr3	108836693	108837620	9	3.64037e-14	0.05861	0.200302	0.0710338	cg16259931	Body	MORC1	5mC	shore	NA
113	chr3	108836693	108837620	9	3.64037e-14	0.05861	0.200302	0.0710338	cg19857541	Body	MORC1	5mC	island	NA
113	chr3	108836693	108837620	9	3.64037e-14	0.05861	0.200302	0.0710338	cg07090057	TSS1500	MORC1	5mC	shore	NA
113	chr3	108836693	108837620	9	3.64037e-14	0.05861	0.200302	0.0710338	cg25092670	TSS1500	MORC1	5mC	shore	NA
113	chr3	108836693	108837620	9	3.64037e-14	0.05861	0.200302	0.0710338	cg04167867	TSS200	MORC1	5mC	shore	NA
113	chr3	108836693	108837620	9	3.64037e-14	0.05861	0.200302	0.0710338	cg09436190	TSS200	MORC1	5mC	island	NA
113	chr3	108836693	108837620	9	3.64037e-14	0.05861	0.200302	0.0710338	cg26540808	TSS200	MORC1	5mC	island	NA
113	chr3	108836693	108837620	9	3.64037e-14	0.05861	0.200302	0.0710338	cg25456186	TSS200	MORC1	5mC	island	NA
113	chr3	108836693	108837620	9	3.64037e-14	0.05861	0.200302	0.0710338	cg18733433	TSS200	MORC1	5mC	island	NA
113	chr3	108836693	108837620	9	3.64037e-14	0.05861	0.200302	0.0710338	cg14566661	TSS200	MORC1	5mC	island	NA
114	chr17	17109239	17109740	4	4.18645e-12	0.0593408	-0.115831	-0.0495431	cg01412970	1stExon	PLD6	BS	island	V$AHRARNT_02
114	chr17	17109239	17109740	4	4.18645e-12	0.0593408	-0.115831	-0.0495431	cg05590257	1stExon	PLD6	BS	island	NA
114	chr17	17109239	17109740	4	4.18645e-12	0.0593408	-0.115831	-0.0495431	cg03292213	1stExon;5'UTR	PLD6;PLD6	BS	island	NA
114	chr17	17109239	17109740	4	4.18645e-12	0.0593408	-0.115831	-0.0495431	cg26539818	TSS200	PLD6	BS	island	NA
114	chr17	17109239	17109740	4	4.18645e-12	0.0593408	-0.115831	-0.0495431	cg11392858	TSS200	PLD6	BS	island	NA
114	chr17	17109239	17109740	4	4.18645e-12	0.0593408	-0.115831	-0.0495431	cg23661344	TSS200	PLD6	BS	island	NA
114	chr17	17109239	17109740	4	4.18645e-12	0.0593408	-0.115831	-0.0495431	cg00572586	TSS200	PLD6	BS	shore	NA
115	chr1	60539135	60539932	7	1.0925e-19	0.0600151	-0.0954212	-0.00988465	cg24740868	1stExon;5'UTR	C1orf87;C1orf87	-	island	NA
115	chr1	60539135	60539932	7	1.0925e-19	0.0600151	-0.0954212	-0.00988465	cg00914726	1stExon;5'UTR	C1orf87;C1orf87	-	island	NA
115	chr1	60539135	60539932	7	1.0925e-19	0.0600151	-0.0954212	-0.00988465	cg18870231	5'UTR	C1orf87	-	shore	NA
115	chr1	60539135	60539932	7	1.0925e-19	0.0600151	-0.0954212	-0.00988465	cg09851465	TSS1500	C1orf87	-	shore	NA
115	chr1	60539135	60539932	7	1.0925e-19	0.0600151	-0.0954212	-0.00988465	cg20674480	TSS1500	C1orf87	-	shore	NA
115	chr1	60539135	60539932	7	1.0925e-19	0.0600151	-0.0954212	-0.00988465	cg17238766	TSS1500	C1orf87	-	shore	NA
115	chr1	60539135	60539932	7	1.0925e-19	0.0600151	-0.0954212	-0.00988465	cg11231291	TSS1500	C1orf87	-	shore	NA
115	chr1	60539135	60539932	7	1.0925e-19	0.0600151	-0.0954212	-0.00988465	cg15628917	TSS200	C1orf87	-	shore	NA
115	chr1	60539135	60539932	7	1.0925e-19	0.0600151	-0.0954212	-0.00988465	cg09176275	TSS200	C1orf87	-	shore	NA
116	chr7	2082868	2083197	5	5.40488e-10	0.0637955	0.165166	0.110412	cg15914316	Body;Body;Body	MAD1L1;MAD1L1;MAD1L1	5mC	open sea	NA
116	chr7	2082868	2083197	5	5.40488e-10	0.0637955	0.165166	0.110412	cg24577389	Body;Body;Body	MAD1L1;MAD1L1;MAD1L1	5mC	open sea	NA
116	chr7	2082868	2083197	5	5.40488e-10	0.0637955	0.165166	0.110412	cg14010305	Body;Body;Body	MAD1L1;MAD1L1;MAD1L1	5mC	open sea	NA
116	chr7	2082868	2083197	5	5.40488e-10	0.0637955	0.165166	0.110412	cg11792186	Body;Body;Body	MAD1L1;MAD1L1;MAD1L1	5mC	open sea	NA
116	chr7	2082868	2083197	5	5.40488e-10	0.0637955	0.165166	0.110412	cg18483265	Body;Body;Body	MAD1L1;MAD1L1;MAD1L1	5mC	open sea	NA
117	chr10	134971594	134971734	2	6.5779e-09	0.0644668	0.143537	0.108152	cg15784580	-	-	5mC	island	NA
117	chr10	134971594	134971734	2	6.5779e-09	0.0644668	0.143537	0.108152	cg14372635	-	-	5mC	shore	NA
118	chr12	132983589	132984261	3	1.97124e-29	0.0660277	0.192845	0.073467	cg15426626	-	-	-	island	NA
118	chr12	132983589	132984261	3	1.97124e-29	0.0660277	0.192845	0.073467	cg02907117	-	-	-	island	NA
118	chr12	132983589	132984261	3	1.97124e-29	0.0660277	0.192845	0.073467	cg14507016	-	-	-	island	NA
119	chr2	10666585	10666713	3	4.9583e-11	0.0699054	0.156015	0.0606046	cg26539736	-	-	-	island	NA
119	chr2	10666585	10666713	3	4.9583e-11	0.0699054	0.156015	0.0606046	cg10767193	-	-	-	island	NA
119	chr2	10666585	10666713	3	4.9583e-11	0.0699054	0.156015	0.0606046	cg08846959	-	-	-	island	NA
120	chr1	16347984	16347995	2	3.02876e-09	0.0705271	0.156173	0.103615	cg11528029	TSS1500;TSS1500	CLCNKA;CLCNKA	5mC	open sea	NA
120	chr1	16347984	16347995	2	3.02876e-09	0.0705271	0.156173	0.103615	cg16591681	TSS1500;TSS1500	CLCNKA;CLCNKA	5mC	open sea	NA
121	chr7	150109704	150110226	4	3.21959e-11	0.072057	0.168137	0.0432765	cg21104546	-	-	5mC	open sea	NA
121	chr7	150109704	150110226	4	3.21959e-11	0.072057	0.168137	0.0432765	cg10658768	-	-	5mC	open sea	NA
121	chr7	150109704	150110226	4	3.21959e-11	0.072057	0.168137	0.0432765	cg09135201	-	-	5mC	open sea	NA
121	chr7	150109704	150110226	4	3.21959e-11	0.072057	0.168137	0.0432765	cg15391375	-	-	5mC	open sea	NA
122	chr1	175474437	175474533	3	8.03971e-09	0.0732839	0.162322	0.0967457	cg20164016	5'UTR	TNR	-	open sea	NA
122	chr1	175474437	175474533	3	8.03971e-09	0.0732839	0.162322	0.0967457	cg01787798	5'UTR	TNR	-	open sea	NA
122	chr1	175474437	175474533	3	8.03971e-09	0.0732839	0.162322	0.0967457	cg24861859	5'UTR	TNR	-	open sea	NA
123	chr1	50886782	50886920	2	1.15569e-10	0.073761	-0.130685	-0.0802585	cg16732616	Body	DMRTA2	BS	island	NA
123	chr1	50886782	50886920	2	1.15569e-10	0.073761	-0.130685	-0.0802585	cg04455430	Body	DMRTA2	BS	island	V$GRE_C
124	chr11	71313287	71313838	3	3.5106e-14	0.0758044	0.14074	0.058361	cg27252367	-	-	-	open sea	NA
124	chr11	71313287	71313838	3	3.5106e-14	0.0758044	0.14074	0.058361	cg14053701	-	-	-	open sea	NA
124	chr11	71313287	71313838	3	3.5106e-14	0.0758044	0.14074	0.058361	cg25801502	-	-	-	open sea	NA
125	chr12	57584971	57585184	3	1.89822e-09	0.0811891	0.174317	0.103437	cg01515074	Body	LRP1	-	open sea	NA
125	chr12	57584971	57585184	3	1.89822e-09	0.0811891	0.174317	0.103437	cg18443392	Body	LRP1	-	open sea	NA
125	chr12	57584971	57585184	3	1.89822e-09	0.0811891	0.174317	0.103437	cg19258868	Body	LRP1	-	open sea	NA
126	chr1	1099563	1099651	4	4.54265e-10	0.0818456	0.13159	0.0648409	cg08474826	-	-	-	island	NA
126	chr1	1099563	1099651	4	4.54265e-10	0.0818456	0.13159	0.0648409	cg14166948	-	-	-	island	NA
126	chr1	1099563	1099651	4	4.54265e-10	0.0818456	0.13159	0.0648409	cg08090385	-	-	-	island	NA
126	chr1	1099563	1099651	4	4.54265e-10	0.0818456	0.13159	0.0648409	cg20185617	-	-	-	island	NA
127	chr16	88804373	88804971	4	9.9684e-28	0.0837895	0.150942	0.104515	cg06855137	Body	FAM38A	5mC	shore	NA
127	chr16	88804373	88804971	4	9.9684e-28	0.0837895	0.150942	0.104515	cg02443732	Body	FAM38A	5mC	shore	NA
127	chr16	88804373	88804971	4	9.9684e-28	0.0837895	0.150942	0.104515	cg10366867	Body	FAM38A	5mC	shore	NA
127	chr16	88804373	88804971	4	9.9684e-28	0.0837895	0.150942	0.104515	cg07067448	Body	FAM38A	5mC	shore	V$E2F_02
128	chr2	239799720	239799954	3	3.89807e-09	0.08379	0.182893	0.0828866	cg15548656	3'UTR	TWIST2	5mC	open sea	NA
128	chr2	239799720	239799954	3	3.89807e-09	0.08379	0.182893	0.0828866	cg02281489	3'UTR	TWIST2	5mC	open sea	NA
128	chr2	239799720	239799954	3	3.89807e-09	0.08379	0.182893	0.0828866	cg15144319	3'UTR	TWIST2	5mC	open sea	NA
128	chr2	239799720	239799954	3	3.89807e-09	0.08379	0.182893	0.0828866	cg19965312	3'UTR	TWIST2	5mC	open sea	NA
129	chr17	3850285	3851110	4	1.09888e-36	0.0848188	0.190029	0.116178	cg13561792	Body;Body;Body;Body;Body;Body;Body	ATP2A3;ATP2A3;ATP2A3;ATP2A3;ATP2A3;ATP2A3;ATP2A3	5mC	shore	NA
129	chr17	3850285	3851110	4	1.09888e-36	0.0848188	0.190029	0.116178	cg05158913	Body;Body;Body;Body;Body;Body;Body	ATP2A3;ATP2A3;ATP2A3;ATP2A3;ATP2A3;ATP2A3;ATP2A3	5mC	island	NA
129	chr17	3850285	3851110	4	1.09888e-36	0.0848188	0.190029	0.116178	cg19849151	Body;Body;Body;Body;Body;Body;Body	ATP2A3;ATP2A3;ATP2A3;ATP2A3;ATP2A3;ATP2A3;ATP2A3	5mC	island	NA
129	chr17	3850285	3851110	4	1.09888e-36	0.0848188	0.190029	0.116178	cg11869281	Body;Body;Body;Body;Body;Body;Body	ATP2A3;ATP2A3;ATP2A3;ATP2A3;ATP2A3;ATP2A3;ATP2A3	5mC	island	NA
130	chr3	181442676	181443009	3	4.93739e-12	0.0867616	0.0667071	0.0469868	cg11362010	Body	SOX2OT	-	shore	NA
130	chr3	181442676	181443009	3	4.93739e-12	0.0867616	0.0667071	0.0469868	cg01783662	Body	SOX2OT	-	shore	NA
130	chr3	181442676	181443009	3	4.93739e-12	0.0867616	0.0667071	0.0469868	cg03731303	Body	SOX2OT	-	shore	NA
131	chr11	2356706	2356948	2	7.18688e-37	0.0887901	0.208095	0.104649	cg10738865	-	-	5mC	open sea	NA
131	chr11	2356706	2356948	2	7.18688e-37	0.0887901	0.208095	0.104649	cg26688678	-	-	5mC	open sea	NA
132	chr8	144601734	144602485	6	3.97102e-12	0.0904518	0.117098	0.0807644	cg00783706	Body	ZC3H3	-	island	NA
132	chr8	144601734	144602485	6	3.97102e-12	0.0904518	0.117098	0.0807644	cg19598713	Body	ZC3H3	-	island	NA
132	chr8	144601734	144602485	6	3.97102e-12	0.0904518	0.117098	0.0807644	cg18210511	Body	ZC3H3	-	island	NA
132	chr8	144601734	144602485	6	3.97102e-12	0.0904518	0.117098	0.0807644	cg09580859	Body	ZC3H3	-	island	NA
132	chr8	144601734	144602485	6	3.97102e-12	0.0904518	0.117098	0.0807644	cg25900150	Body	ZC3H3	-	island	NA
132	chr8	144601734	144602485	6	3.97102e-12	0.0904518	0.117098	0.0807644	cg25638714	Body	ZC3H3	-	shore	NA
133	chr12	6645287	6645571	2	5.40488e-10	0.0908047	-0.0319393	-0.0275188	cg06362313	Body	GAPDH	-	shore	NA
133	chr12	6645287	6645571	2	5.40488e-10	0.0908047	-0.0319393	-0.0275188	cg21225563	Body	GAPDH	-	shore	NA
134	chr7	155916902	155917159	3	4.9147e-11	0.0910144	0.11191	0.0509638	cg05295082	-	-	-	shore	NA
134	chr7	155916902	155917159	3	4.9147e-11	0.0910144	0.11191	0.0509638	cg13626639	-	-	-	shore	NA
134	chr7	155916902	155917159	3	4.9147e-11	0.0910144	0.11191	0.0509638	cg12620706	-	-	-	shore	NA
135	chr4	5990227	5990638	4	4.2029e-14	0.0932608	0.127985	0.0810095	cg25093045	TSS1500	C4orf50	-	open sea	NA
135	chr4	5990227	5990638	4	4.2029e-14	0.0932608	0.127985	0.0810095	cg16253663	TSS1500	C4orf50	-	open sea	NA
135	chr4	5990227	5990638	4	4.2029e-14	0.0932608	0.127985	0.0810095	cg27193726	TSS200	C4orf50	-	open sea	NA
135	chr4	5990227	5990638	4	4.2029e-14	0.0932608	0.127985	0.0810095	cg19237337	TSS200	C4orf50	-	open sea	NA
136	chr12	3371886	3371908	3	3.40772e-09	0.10175	0.178054	0.0986622	cg07915730	Body;Body	TSPAN9;TSPAN9	-	open sea	NA
136	chr12	3371886	3371908	3	3.40772e-09	0.10175	0.178054	0.0986622	cg14774511	Body;Body	TSPAN9;TSPAN9	-	open sea	NA
136	chr12	3371886	3371908	3	3.40772e-09	0.10175	0.178054	0.0986622	cg17517613	Body;Body	TSPAN9;TSPAN9	-	open sea	NA
137	chr8	11619852	11619866	2	1.07715e-12	0.102096	0.172644	0.103509	cg09232555	-	-	-	open sea	NA
137	chr8	11619852	11619866	2	1.07715e-12	0.102096	0.172644	0.103509	cg11123440	-	-	-	open sea	NA
138	chr6	29571363	29571875	9	5.94612e-11	0.103217	0.113075	0.0651068	cg18656132	Body;Body;Body	GABBR1;GABBR1;GABBR1	5mC	open sea	NA
138	chr6	29571363	29571875	9	5.94612e-11	0.103217	0.113075	0.0651068	cg07169712	Body;Body;Body	GABBR1;GABBR1;GABBR1	5mC	open sea	V$RREB1_01;V$TAXCREB_01
138	chr6	29571363	29571875	9	5.94612e-11	0.103217	0.113075	0.0651068	cg12166917	Body;Body;Body	GABBR1;GABBR1;GABBR1	5mC	open sea	V$TAXCREB_01
138	chr6	29571363	29571875	9	5.94612e-11	0.103217	0.113075	0.0651068	cg00806253	Body;Body;Body	GABBR1;GABBR1;GABBR1	5mC	open sea	V$TAXCREB_01
138	chr6	29571363	29571875	9	5.94612e-11	0.103217	0.113075	0.0651068	cg12083232	Body;Body;Body	GABBR1;GABBR1;GABBR1	5mC	open sea	NA
138	chr6	29571363	29571875	9	5.94612e-11	0.103217	0.113075	0.0651068	cg15136600	Body;Body;Body	GABBR1;GABBR1;GABBR1	5mC	open sea	NA
138	chr6	29571363	29571875	9	5.94612e-11	0.103217	0.113075	0.0651068	cg21652192	Body;Body;Body	GABBR1;GABBR1;GABBR1	5mC	open sea	NA
138	chr6	29571363	29571875	9	5.94612e-11	0.103217	0.113075	0.0651068	cg20067272	Body;Body;Body	GABBR1;GABBR1;GABBR1	5mC	open sea	NA
138	chr6	29571363	29571875	9	5.94612e-11	0.103217	0.113075	0.0651068	cg05437995	Body;Body;Body	GABBR1;GABBR1;GABBR1	5mC	open sea	NA
139	chr6	28871977	28872654	13	9.16443e-10	0.103792	0.0737152	0.0471566	cg26892251	Body	TRIM27	-	open sea	NA
139	chr6	28871977	28872654	13	9.16443e-10	0.103792	0.0737152	0.0471566	cg23780580	Body	TRIM27	-	open sea	NA
139	chr6	28871977	28872654	13	9.16443e-10	0.103792	0.0737152	0.0471566	cg26723331	Body	TRIM27	-	open sea	NA
139	chr6	28871977	28872654	13	9.16443e-10	0.103792	0.0737152	0.0471566	cg17416748	Body	TRIM27	-	open sea	NA
139	chr6	28871977	28872654	13	9.16443e-10	0.103792	0.0737152	0.0471566	cg10729419	Body	TRIM27	-	open sea	NA
139	chr6	28871977	28872654	13	9.16443e-10	0.103792	0.0737152	0.0471566	cg06021189	Body	TRIM27	-	open sea	NA
139	chr6	28871977	28872654	13	9.16443e-10	0.103792	0.0737152	0.0471566	cg27636813	Body	TRIM27	-	open sea	NA
139	chr6	28871977	28872654	13	9.16443e-10	0.103792	0.0737152	0.0471566	cg13612515	Body	TRIM27	-	open sea	NA
139	chr6	28871977	28872654	13	9.16443e-10	0.103792	0.0737152	0.0471566	cg23211158	Body	TRIM27	-	open sea	NA
139	chr6	28871977	28872654	13	9.16443e-10	0.103792	0.0737152	0.0471566	cg09292581	Body	TRIM27	-	open sea	NA
139	chr6	28871977	28872654	13	9.16443e-10	0.103792	0.0737152	0.0471566	cg01928896	Body	TRIM27	-	open sea	NA
139	chr6	28871977	28872654	13	9.16443e-10	0.103792	0.0737152	0.0471566	cg01521674	Body	TRIM27	-	open sea	NA
139	chr6	28871977	28872654	13	9.16443e-10	0.103792	0.0737152	0.0471566	cg22900372	Body	TRIM27	-	open sea	NA
140	chr12	7046277	7046730	2	8.4493e-17	0.104266	0.0567675	0.0444253	cg03393638	Body;Body	ATN1;ATN1	-	island	NA
140	chr12	7046277	7046730	2	8.4493e-17	0.104266	0.0567675	0.0444253	cg14996263	Body;Body	ATN1;ATN1	-	island	NA
141	chr5	555895	556291	2	6.70365e-13	0.109022	0.0712213	0.018043	cg12947079	-	-	-	open sea	NA
141	chr5	555895	556291	2	6.70365e-13	0.109022	0.0712213	0.018043	cg19741148	-	-	-	open sea	NA
142	chr3	71276214	71276336	2	6.46748e-09	0.109287	0.268623	0.112432	cg17803993	5'UTR;5'UTR	FOXP1;FOXP1	-	open sea	NA
142	chr3	71276214	71276336	2	6.46748e-09	0.109287	0.268623	0.112432	cg07368857	5'UTR;5'UTR	FOXP1;FOXP1	-	open sea	NA
143	chr2	242833494	242833648	2	1.7744e-09	0.109462	0.176782	0.119821	cg23069297	-	-	-	shore	NA
143	chr2	242833494	242833648	2	1.7744e-09	0.109462	0.176782	0.119821	cg22764535	-	-	-	shore	NA
144	chr5	138737437	138737585	2	1.93598e-13	0.109675	-0.120162	-0.0749521	cg03259984	Body	SPATA24	-	shore	NA
144	chr5	138737437	138737585	2	1.93598e-13	0.109675	-0.120162	-0.0749521	cg11570383	Body	SPATA24	-	shelf	NA
145	chr1	147718157	147718540	3	1.20738e-13	0.109927	0.0597253	0.00959848	cg03965496	-	-	-	island	NA
145	chr1	147718157	147718540	3	1.20738e-13	0.109927	0.0597253	0.00959848	cg01052200	-	-	-	island	NA
145	chr1	147718157	147718540	3	1.20738e-13	0.109927	0.0597253	0.00959848	cg17442776	-	-	-	island	NA
146	chr21	47706029	47706221	2	2.21042e-09	0.110236	0.0257819	0.0102572	cg22395299	TSS1500;TSS1500;TSS1500	MCM3AP;C21orf57;C21orf57	-	island	NA
146	chr21	47706029	47706221	2	2.21042e-09	0.110236	0.0257819	0.0102572	cg02878701	TSS1500;TSS200;TSS200	MCM3AP;C21orf57;C21orf57	-	island	NA
146	chr21	47706029	47706221	2	2.21042e-09	0.110236	0.0257819	0.0102572	cg03753597	TSS1500;TSS200;TSS200	MCM3AP;C21orf57;C21orf57	-	island	NA
146	chr21	47706029	47706221	2	2.21042e-09	0.110236	0.0257819	0.0102572	cg24553691	TSS1500;TSS200;TSS200	MCM3AP;C21orf57;C21orf57	-	island	NA
146	chr21	47706029	47706221	2	2.21042e-09	0.110236	0.0257819	0.0102572	cg21945459	TSS1500;TSS200;TSS200	MCM3AP;C21orf57;C21orf57	-	island	NA
146	chr21	47706029	47706221	2	2.21042e-09	0.110236	0.0257819	0.0102572	cg20202505	TSS1500;TSS200;TSS200	MCM3AP;C21orf57;C21orf57	-	island	NA
147	chr17	839526	839754	2	8.86286e-10	0.110814	0.116146	0.072869	cg10065210	Body	NXN	5mC	open sea	NA
147	chr17	839526	839754	2	8.86286e-10	0.110814	0.116146	0.072869	cg26003785	Body	NXN	5mC	open sea	NA
148	chr18	12254976	12255318	2	6.16847e-12	0.111888	0.144886	0.0845266	cg12642717	Body;Body	CIDEA;CIDEA	-	shore	NA
148	chr18	12254976	12255318	2	6.16847e-12	0.111888	0.144886	0.0845266	cg07824824	Body;Body	CIDEA;CIDEA	-	island	NA
149	chr17	20798895	20799714	11	3.5106e-14	0.114121	0.176619	0.0587677	cg18251984	1stExon	CCDC144NL	5mC	island	NA
149	chr17	20798895	20799714	11	3.5106e-14	0.114121	0.176619	0.0587677	cg08458692	1stExon;5'UTR	CCDC144NL;CCDC144NL	5mC	island	NA
149	chr17	20798895	20799714	11	3.5106e-14	0.114121	0.176619	0.0587677	cg06633402	Body	CCDC144NL	5mC	shore	NA
149	chr17	20798895	20799714	11	3.5106e-14	0.114121	0.176619	0.0587677	cg25893857	TSS1500	CCDC144NL	5mC	island	NA
149	chr17	20798895	20799714	11	3.5106e-14	0.114121	0.176619	0.0587677	cg11633473	TSS1500	CCDC144NL	5mC	island	NA
149	chr17	20798895	20799714	11	3.5106e-14	0.114121	0.176619	0.0587677	cg08288433	TSS200	CCDC144NL	5mC	island	NA
149	chr17	20798895	20799714	11	3.5106e-14	0.114121	0.176619	0.0587677	cg14560110	TSS200	CCDC144NL	5mC	island	NA
149	chr17	20798895	20799714	11	3.5106e-14	0.114121	0.176619	0.0587677	cg22516161	TSS200	CCDC144NL	5mC	island	NA
149	chr17	20798895	20799714	11	3.5106e-14	0.114121	0.176619	0.0587677	cg06809326	TSS200	CCDC144NL	5mC	island	NA
149	chr17	20798895	20799714	11	3.5106e-14	0.114121	0.176619	0.0587677	cg22570042	TSS200	CCDC144NL	5mC	island	NA
149	chr17	20798895	20799714	11	3.5106e-14	0.114121	0.176619	0.0587677	cg21980100	TSS200	CCDC144NL	5mC	island	NA
150	chr4	619162	619865	8	2.2919e-10	0.114235	0.210684	0.0876327	cg06444452	1stExon;1stExon	PDE6B;PDE6B	5mC	island	NA
150	chr4	619162	619865	8	2.2919e-10	0.114235	0.210684	0.0876327	cg09382601	1stExon;1stExon	PDE6B;PDE6B	5mC	island	NA
150	chr4	619162	619865	8	2.2919e-10	0.114235	0.210684	0.0876327	cg02237540	1stExon;1stExon	PDE6B;PDE6B	5mC	island	NA
150	chr4	619162	619865	8	2.2919e-10	0.114235	0.210684	0.0876327	cg12435792	1stExon;1stExon;5'UTR;5'UTR	PDE6B;PDE6B;PDE6B;PDE6B	5mC	shore	NA
150	chr4	619162	619865	8	2.2919e-10	0.114235	0.210684	0.0876327	cg05078019	1stExon;1stExon;5'UTR;5'UTR	PDE6B;PDE6B;PDE6B;PDE6B	5mC	shore	NA
150	chr4	619162	619865	8	2.2919e-10	0.114235	0.210684	0.0876327	cg06648812	TSS200;TSS200	PDE6B;PDE6B	5mC	shore	NA
150	chr4	619162	619865	8	2.2919e-10	0.114235	0.210684	0.0876327	cg03033111	TSS200;TSS200	PDE6B;PDE6B	5mC	shore	NA
150	chr4	619162	619865	8	2.2919e-10	0.114235	0.210684	0.0876327	cg19463531	TSS200;TSS200	PDE6B;PDE6B	5mC	shore	NA
150	chr4	619162	619865	8	2.2919e-10	0.114235	0.210684	0.0876327	cg04926732	TSS200;TSS200	PDE6B;PDE6B	5mC	shore	NA
151	chr14	101347143	101347290	4	1.70127e-13	0.116869	0.195661	0.0775094	cg23546343	1stExon;TSS200;TSS1500	RTL1;MIR431;MIR433	5mC	shore	NA
151	chr14	101347143	101347290	4	1.70127e-13	0.116869	0.195661	0.0775094	cg06165706	1stExon;TSS200;TSS1500	RTL1;MIR431;MIR433	5mC	shore	NA
151	chr14	101347143	101347290	4	1.70127e-13	0.116869	0.195661	0.0775094	cg18340059	1stExon;TSS200;TSS1500	RTL1;MIR431;MIR433	5mC	shore	NA
151	chr14	101347143	101347290	4	1.70127e-13	0.116869	0.195661	0.0775094	cg15516314	1stExon;TSS200;TSS1500	RTL1;MIR431;MIR433	5mC	shore	NA
152	chr19	34174345	34174388	2	7.47247e-09	0.117996	0.0860869	0.0752284	cg24221853	5'UTR;5'UTR;TSS1500	CHST8;CHST8;CHST8	-	shore	NA
152	chr19	34174345	34174388	2	7.47247e-09	0.117996	0.0860869	0.0752284	cg15642666	5'UTR;5'UTR;TSS1500	CHST8;CHST8;CHST8	-	shore	NA
153	chr14	101350094	101351026	8	7.44979e-13	0.118008	0.172802	0.0647558	cg23377000	TSS1500;1stExon;TSS200	MIR136;RTL1;MIR432	5mC	shore	NA
153	chr14	101350094	101351026	8	7.44979e-13	0.118008	0.172802	0.0647558	cg18141891	TSS1500;1stExon;TSS200	MIR136;RTL1;MIR432	5mC	shore	NA
153	chr14	101350094	101351026	8	7.44979e-13	0.118008	0.172802	0.0647558	cg23682215	TSS1500;1stExon;TSS200	MIR136;RTL1;MIR432	5mC	shore	NA
153	chr14	101350094	101351026	8	7.44979e-13	0.118008	0.172802	0.0647558	cg26254637	TSS1500;1stExon;TSS200	MIR136;RTL1;MIR432	5mC	shore	NA
153	chr14	101350094	101351026	8	7.44979e-13	0.118008	0.172802	0.0647558	cg18947995	TSS1500;1stExon;TSS200	MIR136;RTL1;MIR432	5mC	shore	NA
153	chr14	101350094	101351026	8	7.44979e-13	0.118008	0.172802	0.0647558	cg05371620	TSS1500;TSS1500;1stExon	MIR432;MIR136;RTL1	5mC	shore	NA
153	chr14	101350094	101351026	8	7.44979e-13	0.118008	0.172802	0.0647558	cg04699566	TSS200;1stExon	MIR136;RTL1	5mC	shore	NA
153	chr14	101350094	101351026	8	7.44979e-13	0.118008	0.172802	0.0647558	cg02344891	TSS200;1stExon;Body	MIR136;RTL1;MIR432	5mC	shore	NA
154	chr17	76495017	76495071	2	2.20667e-10	0.120275	-0.176421	-0.0709556	cg15106561	Body	DNAH17	-	shelf	NA
154	chr17	76495017	76495071	2	2.20667e-10	0.120275	-0.176421	-0.0709556	cg27052709	Body	DNAH17	-	shelf	NA
155	chr17	68128754	68128923	3	1.36406e-20	0.120449	0.0985311	0.0204906	cg23663533	Body;Body;Body	KCNJ16;KCNJ16;KCNJ16	-	open sea	NA
155	chr17	68128754	68128923	3	1.36406e-20	0.120449	0.0985311	0.0204906	cg11310812	Body;Body;Body	KCNJ16;KCNJ16;KCNJ16	-	open sea	NA
155	chr17	68128754	68128923	3	1.36406e-20	0.120449	0.0985311	0.0204906	cg10858415	Body;Body;Body	KCNJ16;KCNJ16;KCNJ16	-	open sea	NA
155	chr17	68128754	68128923	3	1.36406e-20	0.120449	0.0985311	0.0204906	cg01487494	Body;Body;Body	KCNJ16;KCNJ16;KCNJ16	-	open sea	V$PAX3_01
156	chr6	42989096	42989345	2	1.71877e-10	0.121847	0.0214727	0.00113116	cg09478591	TSS1500	C6orf153	-	shore	NA
156	chr6	42989096	42989345	2	1.71877e-10	0.121847	0.0214727	0.00113116	cg05777492	TSS1500	C6orf153	-	island	NA
156	chr6	42989096	42989345	2	1.71877e-10	0.121847	0.0214727	0.00113116	cg22491171	TSS1500	C6orf153	-	island	NA
156	chr6	42989096	42989345	2	1.71877e-10	0.121847	0.0214727	0.00113116	cg05428912	TSS200	C6orf153	-	island	NA
156	chr6	42989096	42989345	2	1.71877e-10	0.121847	0.0214727	0.00113116	cg03989789	TSS200	C6orf153	-	island	NA
156	chr6	42989096	42989345	2	1.71877e-10	0.121847	0.0214727	0.00113116	cg18802486	TSS200	C6orf153	-	island	NA
157	chr17	9850262	9850268	2	5.7471e-09	0.122281	0.160751	0.10088	cg26217185	Body;Body;Body;Body	GAS7;GAS7;GAS7;GAS7	5mC	open sea	NA
157	chr17	9850262	9850268	2	5.7471e-09	0.122281	0.160751	0.10088	cg16537306	Body;Body;Body;Body	GAS7;GAS7;GAS7;GAS7	5mC	open sea	NA
158	chr11	68193549	68194238	6	5.88866e-11	0.123036	-0.106494	0.023465	cg08035277	Body	LRP5	-	shore	NA
158	chr11	68193549	68194238	6	5.88866e-11	0.123036	-0.106494	0.023465	cg07758428	Body	LRP5	-	shore	NA
158	chr11	68193549	68194238	6	5.88866e-11	0.123036	-0.106494	0.023465	cg25435338	Body	LRP5	-	shore	NA
158	chr11	68193549	68194238	6	5.88866e-11	0.123036	-0.106494	0.023465	cg24538967	Body	LRP5	-	shore	NA
158	chr11	68193549	68194238	6	5.88866e-11	0.123036	-0.106494	0.023465	cg05825928	Body	LRP5	-	shore	NA
158	chr11	68193549	68194238	6	5.88866e-11	0.123036	-0.106494	0.023465	cg17198658	Body	LRP5	-	shore	NA
158	chr11	68193549	68194238	6	5.88866e-11	0.123036	-0.106494	0.023465	cg13872780	Body	LRP5	-	shore	NA
159	chr1	84326462	84326624	3	6.86548e-09	0.123399	-0.0422887	-0.0180891	cg14790630	-	-	-	island	NA
159	chr1	84326462	84326624	3	6.86548e-09	0.123399	-0.0422887	-0.0180891	cg07807165	-	-	-	island	NA
159	chr1	84326462	84326624	3	6.86548e-09	0.123399	-0.0422887	-0.0180891	cg02531516	-	-	-	island	NA
160	chr4	3643404	3643770	4	1.41425e-11	0.123618	0.125046	0.0823356	cg02784202	-	-	5mC	shore	NA
160	chr4	3643404	3643770	4	1.41425e-11	0.123618	0.125046	0.0823356	cg21441657	-	-	5mC	shore	NA
160	chr4	3643404	3643770	4	1.41425e-11	0.123618	0.125046	0.0823356	cg09367432	-	-	-	shore	NA
160	chr4	3643404	3643770	4	1.41425e-11	0.123618	0.125046	0.0823356	cg15031150	-	-	-	island	NA
161	chr8	48649457	48649767	2	5.16474e-09	0.124973	0.077563	0.0413714	cg04239843	1stExon;3'UTR	CEBPD;CEBPD	-	island	NA
161	chr8	48649457	48649767	2	5.16474e-09	0.124973	0.077563	0.0413714	cg11426427	-	-	-	shore	NA
162	chr17	4337094	4337202	4	4.20452e-09	0.128271	0.114954	0.0604404	cg01138020	TSS200	SPNS3	-	open sea	NA
162	chr17	4337094	4337202	4	4.20452e-09	0.128271	0.114954	0.0604404	cg01768686	TSS200	SPNS3	-	open sea	NA
162	chr17	4337094	4337202	4	4.20452e-09	0.128271	0.114954	0.0604404	cg03820795	TSS200	SPNS3	-	open sea	NA
162	chr17	4337094	4337202	4	4.20452e-09	0.128271	0.114954	0.0604404	cg00356694	TSS200	SPNS3	-	open sea	NA
163	chr6	158507753	158508188	4	1.17178e-15	0.128418	0.154016	0.0848603	cg11723077	Body	SYNJ2	BS	shore	NA
163	chr6	158507753	158508188	4	1.17178e-15	0.128418	0.154016	0.0848603	cg10977795	Body	SYNJ2	BS	island	NA
163	chr6	158507753	158508188	4	1.17178e-15	0.128418	0.154016	0.0848603	cg09667606	Body	SYNJ2	BS	island	NA
163	chr6	158507753	158508188	4	1.17178e-15	0.128418	0.154016	0.0848603	cg14533068	Body	SYNJ2	BS	island	NA
164	chr6	30434129	30434552	5	5.71696e-15	0.130686	-0.0345065	-0.0218162	cg09002049	-	-	-	shore	NA
164	chr6	30434129	30434552	5	5.71696e-15	0.130686	-0.0345065	-0.0218162	cg27535757	-	-	-	island	NA
164	chr6	30434129	30434552	5	5.71696e-15	0.130686	-0.0345065	-0.0218162	cg04293259	-	-	-	island	NA
164	chr6	30434129	30434552	5	5.71696e-15	0.130686	-0.0345065	-0.0218162	cg24650522	-	-	-	island	NA
164	chr6	30434129	30434552	5	5.71696e-15	0.130686	-0.0345065	-0.0218162	cg20073831	-	-	-	island	NA
164	chr6	30434129	30434552	5	5.71696e-15	0.130686	-0.0345065	-0.0218162	cg27061115	-	-	-	island	NA
164	chr6	30434129	30434552	5	5.71696e-15	0.130686	-0.0345065	-0.0218162	cg10196102	-	-	-	island	NA
164	chr6	30434129	30434552	5	5.71696e-15	0.130686	-0.0345065	-0.0218162	cg21740359	-	-	-	island	NA
164	chr6	30434129	30434552	5	5.71696e-15	0.130686	-0.0345065	-0.0218162	cg00012701	-	-	-	island	NA
164	chr6	30434129	30434552	5	5.71696e-15	0.130686	-0.0345065	-0.0218162	cg22845037	-	-	-	island	NA
164	chr6	30434129	30434552	5	5.71696e-15	0.130686	-0.0345065	-0.0218162	cg11012953	-	-	-	island	NA
164	chr6	30434129	30434552	5	5.71696e-15	0.130686	-0.0345065	-0.0218162	cg22829821	-	-	-	island	NA
164	chr6	30434129	30434552	5	5.71696e-15	0.130686	-0.0345065	-0.0218162	cg09364338	-	-	-	shore	NA
164	chr6	30434129	30434552	5	5.71696e-15	0.130686	-0.0345065	-0.0218162	cg15265458	-	-	-	shore	NA
165	chr3	180319597	180320022	3	1.94314e-14	0.133103	0.0273656	0.0192331	cg19444950	5'UTR;1stExon;1stExon;5'UTR	TTC14;TTC14;TTC14;TTC14	-	island	NA
165	chr3	180319597	180320022	3	1.94314e-14	0.133103	0.0273656	0.0192331	cg00818693	5'UTR;1stExon;1stExon;5'UTR	TTC14;TTC14;TTC14;TTC14	-	island	NA
165	chr3	180319597	180320022	3	1.94314e-14	0.133103	0.0273656	0.0192331	cg15870818	TSS1500;TSS1500	TTC14;TTC14	-	shore	NA
165	chr3	180319597	180320022	3	1.94314e-14	0.133103	0.0273656	0.0192331	cg10459387	TSS200;TSS200	TTC14;TTC14	-	shore	NA
165	chr3	180319597	180320022	3	1.94314e-14	0.133103	0.0273656	0.0192331	cg14930059	TSS200;TSS200	TTC14;TTC14	-	island	NA
165	chr3	180319597	180320022	3	1.94314e-14	0.133103	0.0273656	0.0192331	cg01335781	TSS200;TSS200	TTC14;TTC14	-	island	NA
165	chr3	180319597	180320022	3	1.94314e-14	0.133103	0.0273656	0.0192331	cg20047732	TSS200;TSS200	TTC14;TTC14	-	island	NA
165	chr3	180319597	180320022	3	1.94314e-14	0.133103	0.0273656	0.0192331	cg16496895	TSS200;TSS200	TTC14;TTC14	-	island	NA
166	chr16	89115353	89115733	3	2.69959e-15	0.133434	0.151109	0.0755234	cg16626731	-	-	-	shore	NA
166	chr16	89115353	89115733	3	2.69959e-15	0.133434	0.151109	0.0755234	cg01570142	-	-	-	shore	NA
166	chr16	89115353	89115733	3	2.69959e-15	0.133434	0.151109	0.0755234	cg26515389	-	-	-	shore	NA
167	chr5	43019773	43020451	6	8.03322e-11	0.141372	-0.0404716	-0.012684	cg26437825	-	-	-	shore	NA
167	chr5	43019773	43020451	6	8.03322e-11	0.141372	-0.0404716	-0.012684	cg20739435	-	-	-	shore	NA
167	chr5	43019773	43020451	6	8.03322e-11	0.141372	-0.0404716	-0.012684	cg20565980	-	-	-	shore	NA
167	chr5	43019773	43020451	6	8.03322e-11	0.141372	-0.0404716	-0.012684	cg07541200	-	-	-	shore	NA
167	chr5	43019773	43020451	6	8.03322e-11	0.141372	-0.0404716	-0.012684	cg05975410	-	-	-	shore	NA
167	chr5	43019773	43020451	6	8.03322e-11	0.141372	-0.0404716	-0.012684	cg14450725	-	-	-	shore	NA
168	chr11	110225049	110225333	2	2.44641e-10	0.141992	-0.0963188	-0.0430318	cg06125821	-	-	-	open sea	NA
168	chr11	110225049	110225333	2	2.44641e-10	0.141992	-0.0963188	-0.0430318	cg10924806	-	-	-	open sea	NA
169	chr12	3103878	3104055	3	1.51026e-09	0.142052	0.103474	0.065284	cg19263974	5'UTR;5'UTR;5'UTR	TEAD4;TEAD4;TEAD4	-	open sea	NA
169	chr12	3103878	3104055	3	1.51026e-09	0.142052	0.103474	0.065284	cg14232889	Body;Body;5'UTR	TEAD4;TEAD4;TEAD4	-	open sea	NA
169	chr12	3103878	3104055	3	1.51026e-09	0.142052	0.103474	0.065284	cg24775300	Body;Body;5'UTR	TEAD4;TEAD4;TEAD4	-	open sea	NA
170	chr7	131864510	131864608	2	4.92982e-12	0.145888	0.168323	0.0974677	cg03295361	Body	PLXNA4	5mC	open sea	NA
170	chr7	131864510	131864608	2	4.92982e-12	0.145888	0.168323	0.0974677	cg09244601	Body	PLXNA4	5mC	open sea	V$CREBP1_Q2
171	chr8	38964500	38965492	12	3.79025e-13	0.146039	0.12333	0.0525296	cg26124318	1stExon;5'UTR	ADAM32;ADAM32	-	island	NA
171	chr8	38964500	38965492	12	3.79025e-13	0.146039	0.12333	0.0525296	cg02637318	1stExon;5'UTR	ADAM32;ADAM32	-	island	NA
171	chr8	38964500	38965492	12	3.79025e-13	0.146039	0.12333	0.0525296	cg03780701	Body	ADAM32	-	island	NA
171	chr8	38964500	38965492	12	3.79025e-13	0.146039	0.12333	0.0525296	cg16540080	Body	ADAM32	-	shore	NA
171	chr8	38964500	38965492	12	3.79025e-13	0.146039	0.12333	0.0525296	cg01565608	TSS1500	ADAM32	-	shore	NA
171	chr8	38964500	38965492	12	3.79025e-13	0.146039	0.12333	0.0525296	cg11052259	TSS1500	ADAM32	-	shore	NA
171	chr8	38964500	38965492	12	3.79025e-13	0.146039	0.12333	0.0525296	cg27417469	TSS200	ADAM32	-	shore	NA
171	chr8	38964500	38965492	12	3.79025e-13	0.146039	0.12333	0.0525296	cg14618996	TSS200	ADAM32	-	shore	NA
171	chr8	38964500	38965492	12	3.79025e-13	0.146039	0.12333	0.0525296	cg26394257	TSS200	ADAM32	-	shore	NA
171	chr8	38964500	38965492	12	3.79025e-13	0.146039	0.12333	0.0525296	cg08827307	TSS200	ADAM32	-	island	NA
171	chr8	38964500	38965492	12	3.79025e-13	0.146039	0.12333	0.0525296	cg05789704	TSS200	ADAM32	-	island	NA
171	chr8	38964500	38965492	12	3.79025e-13	0.146039	0.12333	0.0525296	cg22848598	TSS200	ADAM32	-	island	NA
172	chr16	4748507	4749556	8	1.09929e-19	0.14619	0.193501	0.0806976	cg03681679	Body	ANKS3	5mC	open sea	NA
172	chr16	4748507	4749556	8	1.09929e-19	0.14619	0.193501	0.0806976	cg00181419	Body	ANKS3	5mC	open sea	NA
172	chr16	4748507	4749556	8	1.09929e-19	0.14619	0.193501	0.0806976	cg00387982	Body	ANKS3	5mC	open sea	NA
172	chr16	4748507	4749556	8	1.09929e-19	0.14619	0.193501	0.0806976	cg09466397	Body	ANKS3	5mC	open sea	NA
172	chr16	4748507	4749556	8	1.09929e-19	0.14619	0.193501	0.0806976	cg09851072	Body	ANKS3	5mC	open sea	NA
172	chr16	4748507	4749556	8	1.09929e-19	0.14619	0.193501	0.0806976	cg26544435	Body	ANKS3	5mC	open sea	NA
172	chr16	4748507	4749556	8	1.09929e-19	0.14619	0.193501	0.0806976	cg07291802	Body	ANKS3	-	open sea	V$PAX5_02
172	chr16	4748507	4749556	8	1.09929e-19	0.14619	0.193501	0.0806976	cg03914988	Body	ANKS3	-	open sea	NA
173	chr3	49377853	49378124	5	3.40583e-14	0.147697	0.0329981	0.0157333	cg12384572	TSS1500;TSS1500	USP4;USP4	-	shore	NA
173	chr3	49377853	49378124	5	3.40583e-14	0.147697	0.0329981	0.0157333	cg16347136	TSS1500;TSS1500	USP4;USP4	-	island	NA
173	chr3	49377853	49378124	5	3.40583e-14	0.147697	0.0329981	0.0157333	cg06624156	TSS1500;TSS1500	USP4;USP4	-	shore	NA
173	chr3	49377853	49378124	5	3.40583e-14	0.147697	0.0329981	0.0157333	cg18886444	TSS1500;TSS1500	USP4;USP4	-	shore	NA
173	chr3	49377853	49378124	5	3.40583e-14	0.147697	0.0329981	0.0157333	cg26353296	TSS1500;TSS1500	USP4;USP4	-	shore	NA
174	chr8	143867942	143869473	19	1.24336e-10	0.1502	0.132425	0.0485411	cg26466375	TSS1500	LY6D	5mC	open sea	NA
174	chr8	143867942	143869473	19	1.24336e-10	0.1502	0.132425	0.0485411	cg02918648	TSS1500	LY6D	5mC	open sea	NA
174	chr8	143867942	143869473	19	1.24336e-10	0.1502	0.132425	0.0485411	cg17080283	TSS1500	LY6D	5mC	open sea	NA
174	chr8	143867942	143869473	19	1.24336e-10	0.1502	0.132425	0.0485411	cg02679028	TSS1500	LY6D	5mC	open sea	NA
174	chr8	143867942	143869473	19	1.24336e-10	0.1502	0.132425	0.0485411	cg02926397	TSS1500	LY6D	5mC	open sea	NA
174	chr8	143867942	143869473	19	1.24336e-10	0.1502	0.132425	0.0485411	cg23436058	TSS1500	LY6D	5mC	open sea	NA
174	chr8	143867942	143869473	19	1.24336e-10	0.1502	0.132425	0.0485411	cg26042490	TSS1500	LY6D	5mC	open sea	NA
174	chr8	143867942	143869473	19	1.24336e-10	0.1502	0.132425	0.0485411	cg01054454	TSS1500	LY6D	5mC	open sea	NA
174	chr8	143867942	143869473	19	1.24336e-10	0.1502	0.132425	0.0485411	cg14031465	TSS1500	LY6D	5mC	open sea	NA
174	chr8	143867942	143869473	19	1.24336e-10	0.1502	0.132425	0.0485411	cg07661805	1stExon;5'UTR	LY6D;LY6D	-	open sea	NA
174	chr8	143867942	143869473	19	1.24336e-10	0.1502	0.132425	0.0485411	cg24495007	1stExon;5'UTR	LY6D;LY6D	-	open sea	NA
174	chr8	143867942	143869473	19	1.24336e-10	0.1502	0.132425	0.0485411	cg20100987	TSS1500	LY6D	-	open sea	NA
174	chr8	143867942	143869473	19	1.24336e-10	0.1502	0.132425	0.0485411	cg07572435	TSS200	LY6D	-	open sea	NA
174	chr8	143867942	143869473	19	1.24336e-10	0.1502	0.132425	0.0485411	cg08137669	TSS200	LY6D	-	open sea	NA
174	chr8	143867942	143869473	19	1.24336e-10	0.1502	0.132425	0.0485411	cg08209691	TSS200	LY6D	-	open sea	NA
174	chr8	143867942	143869473	19	1.24336e-10	0.1502	0.132425	0.0485411	cg04811942	TSS200	LY6D	-	open sea	NA
174	chr8	143867942	143869473	19	1.24336e-10	0.1502	0.132425	0.0485411	cg10140583	TSS200	LY6D	-	open sea	NA
174	chr8	143867942	143869473	19	1.24336e-10	0.1502	0.132425	0.0485411	cg09964873	TSS200	LY6D	-	open sea	NA
174	chr8	143867942	143869473	19	1.24336e-10	0.1502	0.132425	0.0485411	cg14585892	TSS200	LY6D	-	open sea	NA
175	chr2	45232417	45232888	3	3.29729e-13	0.150883	0.0495446	0.0385342	cg07834682	3'UTR	SIX2	-	shore	NA
175	chr2	45232417	45232888	3	3.29729e-13	0.150883	0.0495446	0.0385342	cg00366850	3'UTR	SIX2	-	island	NA
175	chr2	45232417	45232888	3	3.29729e-13	0.150883	0.0495446	0.0385342	cg02893453	3'UTR	SIX2	-	shore	NA
176	chr4	52917875	52918065	2	4.24214e-09	0.153239	-0.0482308	-0.0386585	cg09022993	1stExon	SPATA18	-	island	NA
176	chr4	52917875	52918065	2	4.24214e-09	0.153239	-0.0482308	-0.0386585	cg01429039	Body	SPATA18	-	island	NA
177	chr8	1048841	1049901	8	6.65493e-17	0.154406	0.143844	0.0531111	cg04106395	-	-	-	shore	NA
177	chr8	1048841	1049901	8	6.65493e-17	0.154406	0.143844	0.0531111	cg21515003	-	-	-	shore	NA
177	chr8	1048841	1049901	8	6.65493e-17	0.154406	0.143844	0.0531111	cg22346032	-	-	-	island	NA
177	chr8	1048841	1049901	8	6.65493e-17	0.154406	0.143844	0.0531111	cg25705452	-	-	-	island	NA
177	chr8	1048841	1049901	8	6.65493e-17	0.154406	0.143844	0.0531111	cg09618773	-	-	-	shore	NA
177	chr8	1048841	1049901	8	6.65493e-17	0.154406	0.143844	0.0531111	cg15682797	-	-	-	shore	NA
177	chr8	1048841	1049901	8	6.65493e-17	0.154406	0.143844	0.0531111	cg17119279	-	-	-	shore	NA
177	chr8	1048841	1049901	8	6.65493e-17	0.154406	0.143844	0.0531111	cg24185817	-	-	-	shore	NA
178	chr2	1668487	1668758	2	3.40583e-14	0.155021	0.149858	0.0590145	cg08084799	Body	PXDN	-	shore	NA
178	chr2	1668487	1668758	2	3.40583e-14	0.155021	0.149858	0.0590145	cg12624031	Body	PXDN	-	shore	NA
179	chr6	31708226	31708299	5	7.9224e-10	0.157437	0.0498468	0.0252478	cg08888439	5'UTR;5'UTR;5'UTR;5'UTR	MSH5;MSH5;MSH5;MSH5	-	island	NA
179	chr6	31708226	31708299	5	7.9224e-10	0.157437	0.0498468	0.0252478	cg14658948	Body;Body;Body;Body	MSH5;MSH5;MSH5;MSH5	-	island	NA
179	chr6	31708226	31708299	5	7.9224e-10	0.157437	0.0498468	0.0252478	cg00868252	Body;Body;Body;Body	MSH5;MSH5;MSH5;MSH5	-	island	NA
179	chr6	31708226	31708299	5	7.9224e-10	0.157437	0.0498468	0.0252478	cg24500422	Body;Body;Body;Body	MSH5;MSH5;MSH5;MSH5	-	island	NA
179	chr6	31708226	31708299	5	7.9224e-10	0.157437	0.0498468	0.0252478	cg24932925	Body;Body;Body;Body	MSH5;MSH5;MSH5;MSH5	-	island	NA
180	chr10	134540973	134541472	3	4.91461e-14	0.158649	0.142382	0.0703141	cg04744514	Body	INPP5A	5mC	shore	NA
180	chr10	134540973	134541472	3	4.91461e-14	0.158649	0.142382	0.0703141	cg20210689	Body	INPP5A	5mC	shore	NA
180	chr10	134540973	134541472	3	4.91461e-14	0.158649	0.142382	0.0703141	cg09649196	Body	INPP5A	-	shore	NA
181	chr13	31480942	31481184	3	9.88241e-12	0.165137	0.137895	0.0419037	cg13251181	Body	C13orf33	-	shore	NA
181	chr13	31480942	31481184	3	9.88241e-12	0.165137	0.137895	0.0419037	cg00570269	Body	C13orf33	-	island	NA
181	chr13	31480942	31481184	3	9.88241e-12	0.165137	0.137895	0.0419037	cg00367615	Body	C13orf33	-	island	NA
182	chr7	142970319	142970460	2	3.91157e-15	0.165448	0.263996	0.138915	cg13976610	-	-	5mC	open sea	NA
182	chr7	142970319	142970460	2	3.91157e-15	0.165448	0.263996	0.138915	cg08161136	-	-	5mC	open sea	NA
183	chr1	4221388	4221485	3	1.6307e-19	0.165473	0.157524	0.0739075	cg18213443	-	-	-	island	NA
183	chr1	4221388	4221485	3	1.6307e-19	0.165473	0.157524	0.0739075	cg22016671	-	-	-	island	NA
183	chr1	4221388	4221485	3	1.6307e-19	0.165473	0.157524	0.0739075	cg10622019	-	-	-	island	NA
184	chr12	132653089	132653212	3	1.13272e-09	0.167237	0.120581	0.0773358	cg16392561	-	-	-	island	NA
184	chr12	132653089	132653212	3	1.13272e-09	0.167237	0.120581	0.0773358	cg08812266	-	-	-	island	NA
184	chr12	132653089	132653212	3	1.13272e-09	0.167237	0.120581	0.0773358	cg06937459	-	-	-	island	NA
185	chr3	44803289	44803452	5	5.00759e-09	0.172556	-0.0627945	-0.0158435	cg25743481	1stExon;5'UTR;TSS200	KIF15;KIF15;KIAA1143	-	island	NA
185	chr3	44803289	44803452	5	5.00759e-09	0.172556	-0.0627945	-0.0158435	cg24888989	1stExon;5'UTR;TSS200	KIF15;KIF15;KIAA1143	-	island	NA
185	chr3	44803289	44803452	5	5.00759e-09	0.172556	-0.0627945	-0.0158435	cg00702638	1stExon;5'UTR;TSS200	KIF15;KIF15;KIAA1143	-	island	NA
185	chr3	44803289	44803452	5	5.00759e-09	0.172556	-0.0627945	-0.0158435	cg07303143	TSS1500;Body	KIAA1143;KIF15	-	island	NA
185	chr3	44803289	44803452	5	5.00759e-09	0.172556	-0.0627945	-0.0158435	cg12141030	TSS1500;Body	KIAA1143;KIF15	-	island	NA
186	chr2	114034534	114034595	2	2.17093e-10	0.174022	-0.0807841	-0.0501023	cg04746199	Body;Body;Body;Body;Body;Body	PAX8;PAX8;PAX8;PAX8;PAX8;LOC440839	-	shore	NA
186	chr2	114034534	114034595	2	2.17093e-10	0.174022	-0.0807841	-0.0501023	cg24409539	Body;Body;Body;Body;Body;Body	PAX8;PAX8;PAX8;PAX8;PAX8;LOC440839	-	island	NA
187	chr6	30130420	30131214	6	2.78162e-10	0.177761	0.0872451	0.0421987	cg22425467	5'UTR;1stExon	TRIM15;TRIM15	-	open sea	NA
187	chr6	30130420	30131214	6	2.78162e-10	0.177761	0.0872451	0.0421987	cg06051311	5'UTR;1stExon	TRIM15;TRIM15	-	open sea	NA
187	chr6	30130420	30131214	6	2.78162e-10	0.177761	0.0872451	0.0421987	cg21856784	5'UTR;1stExon	TRIM15;TRIM15	-	open sea	NA
187	chr6	30130420	30131214	6	2.78162e-10	0.177761	0.0872451	0.0421987	cg18678389	TSS1500	TRIM15	-	open sea	NA
187	chr6	30130420	30131214	6	2.78162e-10	0.177761	0.0872451	0.0421987	cg10708400	TSS1500	TRIM15	-	open sea	NA
187	chr6	30130420	30131214	6	2.78162e-10	0.177761	0.0872451	0.0421987	cg02888490	TSS1500	TRIM15	-	open sea	NA
187	chr6	30130420	30131214	6	2.78162e-10	0.177761	0.0872451	0.0421987	cg09848114	TSS1500	TRIM15	-	open sea	NA
187	chr6	30130420	30131214	6	2.78162e-10	0.177761	0.0872451	0.0421987	cg12422154	TSS200	TRIM15	-	open sea	NA
187	chr6	30130420	30131214	6	2.78162e-10	0.177761	0.0872451	0.0421987	cg02772121	TSS200	TRIM15	-	open sea	NA
188	chr12	122711988	122712381	9	7.89662e-10	0.178411	0.137403	0.0808138	cg14506192	Body;5'UTR;5'UTR;Body;1stExon;1stExon	DIABLO;DIABLO;DIABLO;DIABLO;DIABLO;DIABLO	5mC	shore	NA
188	chr12	122711988	122712381	9	7.89662e-10	0.178411	0.137403	0.0808138	cg13587802	TSS1500;TSS1500;TSS1500;TSS1500	DIABLO;DIABLO;DIABLO;DIABLO	5mC	shore	NA
188	chr12	122711988	122712381	9	7.89662e-10	0.178411	0.137403	0.0808138	cg10802680	TSS200;TSS200;TSS200;TSS200	DIABLO;DIABLO;DIABLO;DIABLO	5mC	shore	NA
188	chr12	122711988	122712381	9	7.89662e-10	0.178411	0.137403	0.0808138	cg14094409	TSS200;TSS200;TSS200;TSS200	DIABLO;DIABLO;DIABLO;DIABLO	5mC	shore	NA
188	chr12	122711988	122712381	9	7.89662e-10	0.178411	0.137403	0.0808138	cg08622923	TSS200;TSS200;TSS200;TSS200	DIABLO;DIABLO;DIABLO;DIABLO	5mC	shore	NA
188	chr12	122711988	122712381	9	7.89662e-10	0.178411	0.137403	0.0808138	cg11804414	TSS200;TSS200;TSS200;TSS200	DIABLO;DIABLO;DIABLO;DIABLO	5mC	shore	NA
188	chr12	122711988	122712381	9	7.89662e-10	0.178411	0.137403	0.0808138	cg21805118	TSS200;TSS200;TSS200;TSS200	DIABLO;DIABLO;DIABLO;DIABLO	5mC	shore	NA
188	chr12	122711988	122712381	9	7.89662e-10	0.178411	0.137403	0.0808138	cg09123760	TSS200;TSS200;TSS200;TSS200	DIABLO;DIABLO;DIABLO;DIABLO	5mC	shore	NA
189	chr6	160388924	160390107	9	2.71781e-18	0.182798	0.109599	0.0165877	cg21774926	TSS1500	IGF2R	-	shore	NA
189	chr6	160388924	160390107	9	2.71781e-18	0.182798	0.109599	0.0165877	cg18189591	TSS1500	IGF2R	-	shore	NA
189	chr6	160388924	160390107	9	2.71781e-18	0.182798	0.109599	0.0165877	cg08569322	TSS1500	IGF2R	-	shore	NA
189	chr6	160388924	160390107	9	2.71781e-18	0.182798	0.109599	0.0165877	cg05885023	TSS1500	IGF2R	-	shore	NA
189	chr6	160388924	160390107	9	2.71781e-18	0.182798	0.109599	0.0165877	cg14270073	TSS1500	IGF2R	-	shore	NA
189	chr6	160388924	160390107	9	2.71781e-18	0.182798	0.109599	0.0165877	cg11170810	TSS1500	IGF2R	-	shore	NA
189	chr6	160388924	160390107	9	2.71781e-18	0.182798	0.109599	0.0165877	cg10894318	TSS1500	IGF2R	-	shore	NA
189	chr6	160388924	160390107	9	2.71781e-18	0.182798	0.109599	0.0165877	cg11656326	TSS1500	IGF2R	-	shore	NA
189	chr6	160388924	160390107	9	2.71781e-18	0.182798	0.109599	0.0165877	cg12345982	TSS1500	IGF2R	-	shore	NA
189	chr6	160388924	160390107	9	2.71781e-18	0.182798	0.109599	0.0165877	cg18809600	TSS1500	IGF2R	-	shore	NA
189	chr6	160388924	160390107	9	2.71781e-18	0.182798	0.109599	0.0165877	cg16797777	TSS1500	IGF2R	-	shore	NA
189	chr6	160388924	160390107	9	2.71781e-18	0.182798	0.109599	0.0165877	cg17074454	TSS1500	IGF2R	-	shore	NA
189	chr6	160388924	160390107	9	2.71781e-18	0.182798	0.109599	0.0165877	cg10738016	TSS1500	IGF2R	-	shore	NA
189	chr6	160388924	160390107	9	2.71781e-18	0.182798	0.109599	0.0165877	cg00230368	TSS1500	IGF2R	-	island	NA
189	chr6	160388924	160390107	9	2.71781e-18	0.182798	0.109599	0.0165877	cg27083429	TSS1500	IGF2R	-	island	NA
189	chr6	160388924	160390107	9	2.71781e-18	0.182798	0.109599	0.0165877	cg00180277	TSS1500	IGF2R	-	island	NA
189	chr6	160388924	160390107	9	2.71781e-18	0.182798	0.109599	0.0165877	cg14817370	TSS200	IGF2R	-	island	NA
189	chr6	160388924	160390107	9	2.71781e-18	0.182798	0.109599	0.0165877	cg04276370	TSS200	IGF2R	-	island	NA
189	chr6	160388924	160390107	9	2.71781e-18	0.182798	0.109599	0.0165877	cg14165789	TSS200	IGF2R	-	island	NA
190	chr6	31762353	31762776	12	5.99637e-10	0.183123	-0.048547	-0.0155115	cg03078400	Body	VARS	-	shore	NA
190	chr6	31762353	31762776	12	5.99637e-10	0.183123	-0.048547	-0.0155115	cg02932780	Body	VARS	-	shore	NA
190	chr6	31762353	31762776	12	5.99637e-10	0.183123	-0.048547	-0.0155115	cg02205391	Body	VARS	-	shore	NA
190	chr6	31762353	31762776	12	5.99637e-10	0.183123	-0.048547	-0.0155115	cg06857094	Body	VARS	-	shore	NA
190	chr6	31762353	31762776	12	5.99637e-10	0.183123	-0.048547	-0.0155115	cg11073255	Body	VARS	-	shore	NA
190	chr6	31762353	31762776	12	5.99637e-10	0.183123	-0.048547	-0.0155115	cg25843346	Body	VARS	-	shore	NA
190	chr6	31762353	31762776	12	5.99637e-10	0.183123	-0.048547	-0.0155115	cg12670305	Body	VARS	-	shore	NA
190	chr6	31762353	31762776	12	5.99637e-10	0.183123	-0.048547	-0.0155115	cg16988810	Body	VARS	-	shore	NA
190	chr6	31762353	31762776	12	5.99637e-10	0.183123	-0.048547	-0.0155115	cg03877020	Body	VARS	-	shore	NA
190	chr6	31762353	31762776	12	5.99637e-10	0.183123	-0.048547	-0.0155115	cg18274559	Body	VARS	-	shore	NA
190	chr6	31762353	31762776	12	5.99637e-10	0.183123	-0.048547	-0.0155115	cg04659729	Body	VARS	-	shore	NA
190	chr6	31762353	31762776	12	5.99637e-10	0.183123	-0.048547	-0.0155115	cg26346875	Body	VARS	-	shore	NA
190	chr6	31762353	31762776	12	5.99637e-10	0.183123	-0.048547	-0.0155115	cg01787834	Body	VARS	-	shore	NA
190	chr6	31762353	31762776	12	5.99637e-10	0.183123	-0.048547	-0.0155115	cg13014333	Body	VARS	-	shore	V$HEN1_02
191	chr10	135082008	135082349	4	2.56077e-11	0.185326	0.127325	0.0777352	cg07807481	Body;Body;Body	ADAM8;ADAM8;ADAM8	5mC	island	NA
191	chr10	135082008	135082349	4	2.56077e-11	0.185326	0.127325	0.0777352	cg04225554	Body;Body;Body	ADAM8;ADAM8;ADAM8	5mC	shore	NA
191	chr10	135082008	135082349	4	2.56077e-11	0.185326	0.127325	0.0777352	cg03553964	Body;Body;Body	ADAM8;ADAM8;ADAM8	5mC	island	NA
191	chr10	135082008	135082349	4	2.56077e-11	0.185326	0.127325	0.0777352	cg13893566	Body;Body;Body	ADAM8;ADAM8;ADAM8	5mC	island	NA
191	chr10	135082008	135082349	4	2.56077e-11	0.185326	0.127325	0.0777352	cg05838113	Body;Body;Body	ADAM8;ADAM8;ADAM8	5mC	island	NA
192	chr17	80859477	80859946	3	1.55359e-09	0.187019	0.172809	0.0808828	cg06791695	Body	TBCD	5mC	shelf	NA
192	chr17	80859477	80859946	3	1.55359e-09	0.187019	0.172809	0.0808828	cg08153595	Body	TBCD	5mC	shelf	NA
192	chr17	80859477	80859946	3	1.55359e-09	0.187019	0.172809	0.0808828	cg25022289	Body	TBCD	5mC	shelf	NA
192	chr17	80859477	80859946	3	1.55359e-09	0.187019	0.172809	0.0808828	cg21376658	Body	TBCD	5mC	shelf	NA
193	chr19	7741838	7741955	2	8.9522e-09	0.190119	0.107195	0.0663015	cg12571879	5'UTR;1stExon	C19orf59;C19orf59	-	shelf	NA
193	chr19	7741838	7741955	2	8.9522e-09	0.190119	0.107195	0.0663015	cg17661462	TSS200	C19orf59	-	shelf	NA
194	chr7	155151195	155151427	2	1.55695e-11	0.191365	0.279831	0.149955	cg26463496	-	-	-	open sea	NA
194	chr7	155151195	155151427	2	1.55695e-11	0.191365	0.279831	0.149955	cg14927855	-	-	-	open sea	NA
195	chr3	52255405	52256186	5	9.82489e-12	0.196435	0.132364	0.090902	cg13380109	Body	TLR9	-	island	NA
195	chr3	52255405	52256186	5	9.82489e-12	0.196435	0.132364	0.090902	cg13680844	Body	TLR9	-	island	NA
195	chr3	52255405	52256186	5	9.82489e-12	0.196435	0.132364	0.090902	cg01045723	Body	TLR9	-	island	NA
195	chr3	52255405	52256186	5	9.82489e-12	0.196435	0.132364	0.090902	cg00774149	Body	TLR9	-	island	NA
195	chr3	52255405	52256186	5	9.82489e-12	0.196435	0.132364	0.090902	cg23021329	Body	TLR9	-	shore	NA
196	chr4	174451251	174451413	3	3.41886e-09	0.198091	-0.0490316	-0.00630553	cg02774439	5'UTR;TSS1500;1stExon	HAND2;NBLA00301;HAND2	-	island	NA
196	chr4	174451251	174451413	3	3.41886e-09	0.198091	-0.0490316	-0.00630553	cg00443971	TSS200;TSS1500	HAND2;NBLA00301	-	island	V$CDC5_01
196	chr4	174451251	174451413	3	3.41886e-09	0.198091	-0.0490316	-0.00630553	cg21530280	TSS200;TSS1500	HAND2;NBLA00301	-	island	NA
196	chr4	174451251	174451413	3	3.41886e-09	0.198091	-0.0490316	-0.00630553	cg03676512	TSS200;TSS200	HAND2;NBLA00301	-	island	V$HNF1_01
197	chr16	56622951	56622960	2	9.44563e-09	0.198651	-0.0575466	-0.0163572	cg27295963	TSS1500	MT3	-	shore	NA
197	chr16	56622951	56622960	2	9.44563e-09	0.198651	-0.0575466	-0.0163572	cg06120945	TSS1500	MT3	-	shore	NA
198	chr7	2115547	2115808	2	2.3075e-14	0.202257	0.0770241	0.0301704	cg15410753	Body;Body;Body	MAD1L1;MAD1L1;MAD1L1	-	shore	NA
198	chr7	2115547	2115808	2	2.3075e-14	0.202257	0.0770241	0.0301704	cg00970824	Body;Body;Body	MAD1L1;MAD1L1;MAD1L1	-	shore	NA
199	chr7	63667212	63667718	4	1.96223e-09	0.203941	0.0849381	0.00904799	cg00775388	Body	ZNF735	-	open sea	NA
199	chr7	63667212	63667718	4	1.96223e-09	0.203941	0.0849381	0.00904799	cg26874764	TSS1500	ZNF735	-	open sea	NA
199	chr7	63667212	63667718	4	1.96223e-09	0.203941	0.0849381	0.00904799	cg13809026	TSS1500	ZNF735	-	open sea	NA
199	chr7	63667212	63667718	4	1.96223e-09	0.203941	0.0849381	0.00904799	cg13451008	TSS200	ZNF735	-	open sea	NA
199	chr7	63667212	63667718	4	1.96223e-09	0.203941	0.0849381	0.00904799	cg05632088	TSS200	ZNF735	-	open sea	NA
199	chr7	63667212	63667718	4	1.96223e-09	0.203941	0.0849381	0.00904799	cg14319135	TSS200	ZNF735	-	open sea	NA
199	chr7	63667212	63667718	4	1.96223e-09	0.203941	0.0849381	0.00904799	cg13571470	TSS200	ZNF735	-	open sea	NA
200	chr7	100490570	100491337	4	1.5658e-12	0.206135	0.22565	0.100439	cg23549117	Body;Body	ACHE;ACHE	-	island	NA
200	chr7	100490570	100491337	4	1.5658e-12	0.206135	0.22565	0.100439	cg01482087	Body;Body	ACHE;ACHE	-	shore	NA
200	chr7	100490570	100491337	4	1.5658e-12	0.206135	0.22565	0.100439	cg15586193	Body;Body	ACHE;ACHE	-	island	NA
200	chr7	100490570	100491337	4	1.5658e-12	0.206135	0.22565	0.100439	cg04380800	Body;Body	ACHE;ACHE	-	shore	NA
201	chr10	61469748	61470282	5	3.48786e-11	0.206742	0.0392383	0.0031687	cg20156450	TSS1500	SLC16A9	-	island	NA
201	chr10	61469748	61470282	5	3.48786e-11	0.206742	0.0392383	0.0031687	cg10845249	TSS1500	SLC16A9	-	island	NA
201	chr10	61469748	61470282	5	3.48786e-11	0.206742	0.0392383	0.0031687	cg00219151	TSS1500	SLC16A9	-	shore	NA
201	chr10	61469748	61470282	5	3.48786e-11	0.206742	0.0392383	0.0031687	cg16430909	TSS200	SLC16A9	-	island	NA
201	chr10	61469748	61470282	5	3.48786e-11	0.206742	0.0392383	0.0031687	cg20627835	TSS200	SLC16A9	-	island	NA
201	chr10	61469748	61470282	5	3.48786e-11	0.206742	0.0392383	0.0031687	cg12583927	TSS200	SLC16A9	-	island	NA
201	chr10	61469748	61470282	5	3.48786e-11	0.206742	0.0392383	0.0031687	cg20193173	TSS200	SLC16A9	-	island	NA
201	chr10	61469748	61470282	5	3.48786e-11	0.206742	0.0392383	0.0031687	cg06373764	TSS200	SLC16A9	-	island	NA
201	chr10	61469748	61470282	5	3.48786e-11	0.206742	0.0392383	0.0031687	cg27346088	TSS200	SLC16A9	-	island	NA
202	chr8	11560299	11562155	13	1.18456e-19	0.20928	-0.0405051	-0.0141686	cg14666113	1stExon;5'UTR	GATA4;GATA4	-	island	NA
202	chr8	11560299	11562155	13	1.18456e-19	0.20928	-0.0405051	-0.0141686	cg21073927	5'UTR	GATA4	-	island	NA
202	chr8	11560299	11562155	13	1.18456e-19	0.20928	-0.0405051	-0.0141686	cg06707081	TSS1500	GATA4	-	island	V$MEF2_01
202	chr8	11560299	11562155	13	1.18456e-19	0.20928	-0.0405051	-0.0141686	cg16803596	TSS1500	GATA4	-	island	NA
202	chr8	11560299	11562155	13	1.18456e-19	0.20928	-0.0405051	-0.0141686	cg22320962	TSS1500	GATA4	-	island	NA
202	chr8	11560299	11562155	13	1.18456e-19	0.20928	-0.0405051	-0.0141686	cg08379586	TSS1500	GATA4	-	island	NA
202	chr8	11560299	11562155	13	1.18456e-19	0.20928	-0.0405051	-0.0141686	cg13680188	TSS1500	GATA4	-	island	NA
202	chr8	11560299	11562155	13	1.18456e-19	0.20928	-0.0405051	-0.0141686	cg16795466	TSS1500	GATA4	-	island	NA
202	chr8	11560299	11562155	13	1.18456e-19	0.20928	-0.0405051	-0.0141686	cg05930881	TSS1500	GATA4	-	island	NA
202	chr8	11560299	11562155	13	1.18456e-19	0.20928	-0.0405051	-0.0141686	cg13166213	TSS1500	GATA4	-	island	NA
202	chr8	11560299	11562155	13	1.18456e-19	0.20928	-0.0405051	-0.0141686	cg04233840	TSS1500	GATA4	-	island	NA
202	chr8	11560299	11562155	13	1.18456e-19	0.20928	-0.0405051	-0.0141686	cg00595237	TSS1500	GATA4	-	island	V$CEBP_C;V$CDPCR1_01
202	chr8	11560299	11562155	13	1.18456e-19	0.20928	-0.0405051	-0.0141686	cg18123948	TSS1500	GATA4	-	island	V$MEF2_01
202	chr8	11560299	11562155	13	1.18456e-19	0.20928	-0.0405051	-0.0141686	cg05412333	TSS1500	GATA4	-	island	NA
202	chr8	11560299	11562155	13	1.18456e-19	0.20928	-0.0405051	-0.0141686	cg10451078	TSS1500	GATA4	-	island	NA
202	chr8	11560299	11562155	13	1.18456e-19	0.20928	-0.0405051	-0.0141686	cg09130043	TSS1500	GATA4	-	island	NA
202	chr8	11560299	11562155	13	1.18456e-19	0.20928	-0.0405051	-0.0141686	cg10866709	TSS1500	GATA4	-	island	NA
202	chr8	11560299	11562155	13	1.18456e-19	0.20928	-0.0405051	-0.0141686	cg27100236	TSS1500	GATA4	-	island	NA
202	chr8	11560299	11562155	13	1.18456e-19	0.20928	-0.0405051	-0.0141686	cg14379719	TSS1500	GATA4	-	island	NA
202	chr8	11560299	11562155	13	1.18456e-19	0.20928	-0.0405051	-0.0141686	cg02726121	TSS200	GATA4	-	island	NA
202	chr8	11560299	11562155	13	1.18456e-19	0.20928	-0.0405051	-0.0141686	cg09951349	TSS200	GATA4	-	island	NA
202	chr8	11560299	11562155	13	1.18456e-19	0.20928	-0.0405051	-0.0141686	cg00397986	TSS200	GATA4	-	island	NA
202	chr8	11560299	11562155	13	1.18456e-19	0.20928	-0.0405051	-0.0141686	cg14900471	TSS200	GATA4	-	island	NA
203	chr12	13154475	13155236	5	3.92092e-22	0.213556	0.224578	0.0533946	cg12910900	Body	HTR7P	5mC	shore	NA
203	chr12	13154475	13155236	5	3.92092e-22	0.213556	0.224578	0.0533946	cg20822426	Body	HTR7P	5mC	island	NA
203	chr12	13154475	13155236	5	3.92092e-22	0.213556	0.224578	0.0533946	cg16705889	Body	HTR7P	5mC	shore	NA
203	chr12	13154475	13155236	5	3.92092e-22	0.213556	0.224578	0.0533946	cg22490861	Body;TSS1500	HTR7P;HEBP1	5mC	island	NA
203	chr12	13154475	13155236	5	3.92092e-22	0.213556	0.224578	0.0533946	cg03157633	Body;TSS1500	HTR7P;HEBP1	-	island	NA
204	chr14	96730482	96730780	4	2.71781e-18	0.21665	0.154736	0.0525	cg01863290	Body	BDKRB1	-	open sea	NA
204	chr14	96730482	96730780	4	2.71781e-18	0.21665	0.154736	0.0525	cg22838003	Body	BDKRB1	-	open sea	NA
204	chr14	96730482	96730780	4	2.71781e-18	0.21665	0.154736	0.0525	cg23470139	Body	BDKRB1	-	open sea	NA
204	chr14	96730482	96730780	4	2.71781e-18	0.21665	0.154736	0.0525	cg18129961	Body	BDKRB1	-	open sea	NA
205	chr19	1580400	1580629	4	2.41151e-11	0.223017	0.165779	0.0851021	cg25435465	Body	MBD3	5mC	island	NA
205	chr19	1580400	1580629	4	2.41151e-11	0.223017	0.165779	0.0851021	cg00402516	Body	MBD3	5mC	island	NA
205	chr19	1580400	1580629	4	2.41151e-11	0.223017	0.165779	0.0851021	cg08506306	Body	MBD3	5mC	island	NA
205	chr19	1580400	1580629	4	2.41151e-11	0.223017	0.165779	0.0851021	cg04446467	Body	MBD3	5mC	island	NA
206	chr1	2899264	2899656	2	3.06861e-12	0.223543	0.111683	0.040353	cg03737787	-	-	-	open sea	NA
206	chr1	2899264	2899656	2	3.06861e-12	0.223543	0.111683	0.040353	cg10226013	-	-	-	open sea	NA
206	chr1	2899264	2899656	2	3.06861e-12	0.223543	0.111683	0.040353	cg09469812	-	-	-	open sea	NA
207	chr13	52435164	52435351	2	4.15646e-11	0.225838	0.12098	0.0678121	cg12318152	TSS1500	CCDC70	-	open sea	NA
208	chr10	134073820	134073911	3	3.87091e-09	0.225983	0.112696	0.0616593	cg10843401	Body	STK32C	5mC	shore	NA
208	chr10	134073820	134073911	3	3.87091e-09	0.225983	0.112696	0.0616593	cg08386897	Body	STK32C	5mC	shore	NA
208	chr10	134073820	134073911	3	3.87091e-09	0.225983	0.112696	0.0616593	cg25197240	Body	STK32C	5mC	shore	NA
209	chr5	134365728	134366377	2	2.25603e-24	0.229621	0.0675094	0.0372653	cg18606375	Body	PITX1	-	shore	NA
209	chr5	134365728	134366377	2	2.25603e-24	0.229621	0.0675094	0.0372653	cg03347590	Body	PITX1	-	shore	NA
209	chr5	134365728	134366377	2	2.25603e-24	0.229621	0.0675094	0.0372653	cg21614303	Body	PITX1	-	shore	NA
210	chr6	168443003	168443352	3	1.50522e-17	0.229894	0.0978453	0.0475833	cg16320173	Body;Body	KIF25;KIF25	-	open sea	NA
210	chr6	168443003	168443352	3	1.50522e-17	0.229894	0.0978453	0.0475833	cg25008524	Body;Body	KIF25;KIF25	-	open sea	NA
210	chr6	168443003	168443352	3	1.50522e-17	0.229894	0.0978453	0.0475833	cg15770012	Body;Body	KIF25;KIF25	-	open sea	NA
211	chr2	176971353	176972113	5	2.19715e-12	0.230096	-0.0355738	-0.0150997	cg16632715	1stExon	HOXD11	-	island	NA
211	chr2	176971353	176972113	5	2.19715e-12	0.230096	-0.0355738	-0.0150997	cg02527112	TSS1500	HOXD11	-	shore	NA
211	chr2	176971353	176972113	5	2.19715e-12	0.230096	-0.0355738	-0.0150997	cg20124587	TSS1500	HOXD11	-	shore	NA
211	chr2	176971353	176972113	5	2.19715e-12	0.230096	-0.0355738	-0.0150997	cg03782202	TSS1500	HOXD11	-	island	NA
211	chr2	176971353	176972113	5	2.19715e-12	0.230096	-0.0355738	-0.0150997	cg04949206	TSS200	HOXD11	-	island	NA
211	chr2	176971353	176972113	5	2.19715e-12	0.230096	-0.0355738	-0.0150997	cg08806153	TSS200	HOXD11	-	island	NA
211	chr2	176971353	176972113	5	2.19715e-12	0.230096	-0.0355738	-0.0150997	cg05942128	TSS200	HOXD11	-	island	NA
211	chr2	176971353	176972113	5	2.19715e-12	0.230096	-0.0355738	-0.0150997	cg00495775	TSS200	HOXD11	-	island	NA
211	chr2	176971353	176972113	5	2.19715e-12	0.230096	-0.0355738	-0.0150997	cg05500840	TSS200	HOXD11	-	island	NA
212	chr10	135062102	135062155	2	1.01402e-09	0.232572	0.121803	0.0623911	cg14524334	TSS1500	MIR202	5mC	open sea	NA
212	chr10	135062102	135062155	2	1.01402e-09	0.232572	0.121803	0.0623911	cg07944707	TSS1500	MIR202	5mC	open sea	NA
213	chr1	55008319	55008516	2	4.20174e-10	0.233352	0.138117	0.0750402	cg17001034	-	-	-	shore	NA
213	chr1	55008319	55008516	2	4.20174e-10	0.233352	0.138117	0.0750402	cg00590761	-	-	-	island	NA
214	chr4	8073790	8073804	2	2.32971e-09	0.236341	-0.0696912	-0.0412873	cg17949969	Body;Body;Body;Body;Body;Body;Body	ABLIM2;ABLIM2;ABLIM2;ABLIM2;ABLIM2;ABLIM2;ABLIM2	-	open sea	NA
214	chr4	8073790	8073804	2	2.32971e-09	0.236341	-0.0696912	-0.0412873	cg10754215	Body;Body;Body;Body;Body;Body;Body	ABLIM2;ABLIM2;ABLIM2;ABLIM2;ABLIM2;ABLIM2;ABLIM2	-	open sea	NA
215	chr16	81039227	81039325	2	1.53198e-09	0.238402	0.099587	0.0372873	cg03284308	TSS1500;TSS1500;TSS1500;5'UTR	CENPN;CENPN;CENPN;C16orf61	-	shore	NA
215	chr16	81039227	81039325	2	1.53198e-09	0.238402	0.099587	0.0372873	cg08265926	TSS1500;TSS1500;TSS1500;5'UTR	CENPN;CENPN;CENPN;C16orf61	-	shore	NA
216	chr18	44236847	44237658	10	4.11596e-15	0.23892	0.157921	0.0797602	cg06520279	1stExon	LOXHD1	-	island	NA
216	chr18	44236847	44237658	10	4.11596e-15	0.23892	0.157921	0.0797602	cg21737734	Body	LOXHD1	-	island	NA
216	chr18	44236847	44237658	10	4.11596e-15	0.23892	0.157921	0.0797602	cg13561807	TSS1500	LOXHD1	-	shore	NA
216	chr18	44236847	44237658	10	4.11596e-15	0.23892	0.157921	0.0797602	cg19829856	TSS1500	LOXHD1	-	shore	NA
216	chr18	44236847	44237658	10	4.11596e-15	0.23892	0.157921	0.0797602	cg05264816	TSS200	LOXHD1	-	island	NA
216	chr18	44236847	44237658	10	4.11596e-15	0.23892	0.157921	0.0797602	cg22138002	TSS200	LOXHD1	-	island	NA
216	chr18	44236847	44237658	10	4.11596e-15	0.23892	0.157921	0.0797602	cg05315417	TSS200	LOXHD1	-	island	NA
216	chr18	44236847	44237658	10	4.11596e-15	0.23892	0.157921	0.0797602	cg07263382	TSS200	LOXHD1	-	shore	NA
216	chr18	44236847	44237658	10	4.11596e-15	0.23892	0.157921	0.0797602	cg18144485	TSS200	LOXHD1	-	shore	NA
216	chr18	44236847	44237658	10	4.11596e-15	0.23892	0.157921	0.0797602	cg22102582	TSS200	LOXHD1	-	shore	NA
217	chr7	94285270	94285343	6	5.08158e-09	0.239201	-0.0586624	-0.030957	cg13266630	1stExon;TSS1500;1stExon;TSS1500;1stExon	SGCE;PEG10;SGCE;PEG10;SGCE	BS	island	NA
217	chr7	94285270	94285343	6	5.08158e-09	0.239201	-0.0586624	-0.030957	cg23616761	1stExon;TSS1500;1stExon;TSS1500;1stExon	SGCE;PEG10;SGCE;PEG10;SGCE	BS	island	NA
217	chr7	94285270	94285343	6	5.08158e-09	0.239201	-0.0586624	-0.030957	cg17701373	1stExon;TSS1500;1stExon;TSS1500;1stExon	SGCE;PEG10;SGCE;PEG10;SGCE	BS	island	NA
217	chr7	94285270	94285343	6	5.08158e-09	0.239201	-0.0586624	-0.030957	cg23690528	Body;Body;TSS1500;Body;TSS1500	SGCE;SGCE;PEG10;SGCE;PEG10	BS	island	NA
217	chr7	94285270	94285343	6	5.08158e-09	0.239201	-0.0586624	-0.030957	cg16956426	Body;Body;TSS1500;Body;TSS1500	SGCE;SGCE;PEG10;SGCE;PEG10	BS	island	NA
217	chr7	94285270	94285343	6	5.08158e-09	0.239201	-0.0586624	-0.030957	cg17890778	Body;Body;TSS1500;Body;TSS1500	SGCE;SGCE;PEG10;SGCE;PEG10	BS	island	NA
218	chr16	1844927	1845113	5	7.84315e-10	0.24223	0.164622	0.0746605	cg07190921	TSS1500;TSS1500;TSS1500	IGFALS;IGFALS;IGFALS	-	shelf	NA
218	chr16	1844927	1845113	5	7.84315e-10	0.24223	0.164622	0.0746605	cg09996597	TSS200;TSS1500;TSS1500	IGFALS;IGFALS;IGFALS	-	shelf	NA
218	chr16	1844927	1845113	5	7.84315e-10	0.24223	0.164622	0.0746605	cg00629117	TSS200;TSS1500;TSS1500	IGFALS;IGFALS;IGFALS	-	shelf	NA
218	chr16	1844927	1845113	5	7.84315e-10	0.24223	0.164622	0.0746605	cg05982504	TSS200;TSS1500;TSS1500	IGFALS;IGFALS;IGFALS	-	shelf	NA
218	chr16	1844927	1845113	5	7.84315e-10	0.24223	0.164622	0.0746605	cg02593924	TSS200;TSS1500;TSS1500	IGFALS;IGFALS;IGFALS	-	shelf	NA
219	chr1	27113722	27114177	3	5.85922e-10	0.253686	0.0672024	0.0242332	cg07782886	TSS1500	PIGV	-	shore	NA
219	chr1	27113722	27114177	3	5.85922e-10	0.253686	0.0672024	0.0242332	cg01791104	TSS1500	PIGV	-	shore	NA
219	chr1	27113722	27114177	3	5.85922e-10	0.253686	0.0672024	0.0242332	cg12806381	TSS1500	PIGV	-	island	NA
220	chr1	160708987	160709239	3	6.66384e-15	0.255626	0.23036	0.0837528	cg11721194	Body	SLAMF7	-	open sea	NA
220	chr1	160708987	160709239	3	6.66384e-15	0.255626	0.23036	0.0837528	cg07837085	TSS200	SLAMF7	-	open sea	NA
220	chr1	160708987	160709239	3	6.66384e-15	0.255626	0.23036	0.0837528	cg04244970	TSS200	SLAMF7	-	open sea	NA
221	chr10	130268735	130269030	3	1.36461e-11	0.260026	0.127563	0.0879711	cg06119630	-	-	-	open sea	V$AHRARNT_02;V$PAX5_01
221	chr10	130268735	130269030	3	1.36461e-11	0.260026	0.127563	0.0879711	cg27024950	-	-	-	open sea	NA
221	chr10	130268735	130269030	3	1.36461e-11	0.260026	0.127563	0.0879711	cg01319892	-	-	-	open sea	NA
222	chr7	128354862	128355289	5	3.79811e-12	0.263933	0.104959	0.0524026	cg10157098	TSS1500	FAM71F1	-	open sea	NA
222	chr7	128354862	128355289	5	3.79811e-12	0.263933	0.104959	0.0524026	cg21351241	TSS1500	FAM71F1	-	open sea	NA
222	chr7	128354862	128355289	5	3.79811e-12	0.263933	0.104959	0.0524026	cg12560447	TSS1500	FAM71F1	-	open sea	NA
222	chr7	128354862	128355289	5	3.79811e-12	0.263933	0.104959	0.0524026	cg06719448	TSS200	FAM71F1	-	open sea	NA
222	chr7	128354862	128355289	5	3.79811e-12	0.263933	0.104959	0.0524026	cg23525941	TSS200	FAM71F1	-	open sea	NA
223	chr1	3130485	3130550	3	7.20688e-10	0.269589	-0.0847266	-0.00464436	cg06659980	Body;Body	PRDM16;PRDM16	-	open sea	NA
223	chr1	3130485	3130550	3	7.20688e-10	0.269589	-0.0847266	-0.00464436	cg04988794	Body;Body	PRDM16;PRDM16	-	open sea	NA
223	chr1	3130485	3130550	3	7.20688e-10	0.269589	-0.0847266	-0.00464436	cg25372239	Body;Body	PRDM16;PRDM16	-	open sea	NA
224	chr16	47048004	47048265	3	4.46458e-11	0.270404	0.0894728	0.0257449	cg03931865	-	-	-	island	NA
224	chr16	47048004	47048265	3	4.46458e-11	0.270404	0.0894728	0.0257449	cg03743678	-	-	-	island	NA
224	chr16	47048004	47048265	3	4.46458e-11	0.270404	0.0894728	0.0257449	cg14468741	-	-	-	island	NA
224	chr16	47048004	47048265	3	4.46458e-11	0.270404	0.0894728	0.0257449	cg04540493	-	-	-	shore	NA
225	chr17	79829378	79829466	2	2.5606e-16	0.273595	0.0256105	0.013689	cg14122358	TSS1500	ARHGDIA	-	island	NA
225	chr17	79829378	79829466	2	2.5606e-16	0.273595	0.0256105	0.013689	cg14074715	TSS200	ARHGDIA	-	island	NA
225	chr17	79829378	79829466	2	2.5606e-16	0.273595	0.0256105	0.013689	cg22805796	TSS200	ARHGDIA	-	island	NA
225	chr17	79829378	79829466	2	2.5606e-16	0.273595	0.0256105	0.013689	cg23522862	TSS200	ARHGDIA	-	island	NA
226	chr16	1363957	1365052	5	2.14207e-28	0.275742	0.283928	0.119169	cg08626605	5'UTR;5'UTR;5'UTR;5'UTR	UBE2I;UBE2I;UBE2I;UBE2I	5mC	island	NA
226	chr16	1363957	1365052	5	2.14207e-28	0.275742	0.283928	0.119169	cg06703573	Body;Body;Body;Body	UBE2I;UBE2I;UBE2I;UBE2I	5mC	island	NA
226	chr16	1363957	1365052	5	2.14207e-28	0.275742	0.283928	0.119169	cg07511587	Body;Body;Body;Body	UBE2I;UBE2I;UBE2I;UBE2I	5mC	island	NA
226	chr16	1363957	1365052	5	2.14207e-28	0.275742	0.283928	0.119169	cg02920178	Body;Body;Body;Body	UBE2I;UBE2I;UBE2I;UBE2I	5mC	shore	NA
226	chr16	1363957	1365052	5	2.14207e-28	0.275742	0.283928	0.119169	cg01503184	Body;Body;Body;Body	UBE2I;UBE2I;UBE2I;UBE2I	5mC	shore	NA
227	chr5	1324528	1325156	6	9.91934e-11	0.281582	0.204407	0.0825176	cg06665485	Body	CLPTM1L	5mC	open sea	NA
227	chr5	1324528	1325156	6	9.91934e-11	0.281582	0.204407	0.0825176	cg14500614	Body	CLPTM1L	5mC	open sea	NA
227	chr5	1324528	1325156	6	9.91934e-11	0.281582	0.204407	0.0825176	cg25077823	Body	CLPTM1L	5mC	open sea	NA
227	chr5	1324528	1325156	6	9.91934e-11	0.281582	0.204407	0.0825176	cg02053265	Body	CLPTM1L	5mC	open sea	NA
227	chr5	1324528	1325156	6	9.91934e-11	0.281582	0.204407	0.0825176	cg26720682	Body	CLPTM1L	5mC	open sea	NA
227	chr5	1324528	1325156	6	9.91934e-11	0.281582	0.204407	0.0825176	cg09826697	Body	CLPTM1L	5mC	open sea	NA
228	chr5	3822924	3822947	2	1.67268e-13	0.282252	0.15757	0.0864553	cg00322623	-	-	-	open sea	NA
228	chr5	3822924	3822947	2	1.67268e-13	0.282252	0.15757	0.0864553	cg07585899	-	-	-	open sea	NA
229	chr17	73727435	73728061	6	1.90725e-17	0.287454	0.143185	0.0484161	cg20942310	Body;Body;Body	ITGB4;ITGB4;ITGB4	5mC	shore	NA
229	chr17	73727435	73728061	6	1.90725e-17	0.287454	0.143185	0.0484161	cg19159842	Body;Body;Body	ITGB4;ITGB4;ITGB4	5mC	shore	V$SPZ1_01
229	chr17	73727435	73728061	6	1.90725e-17	0.287454	0.143185	0.0484161	cg14601050	Body;Body;Body	ITGB4;ITGB4;ITGB4	5mC	shore	NA
229	chr17	73727435	73728061	6	1.90725e-17	0.287454	0.143185	0.0484161	cg27029445	Body;Body;Body	ITGB4;ITGB4;ITGB4	5mC	shore	NA
229	chr17	73727435	73728061	6	1.90725e-17	0.287454	0.143185	0.0484161	cg24037380	Body;Body;Body	ITGB4;ITGB4;ITGB4	5mC	shore	NA
229	chr17	73727435	73728061	6	1.90725e-17	0.287454	0.143185	0.0484161	cg26314765	Body;Body;Body	ITGB4;ITGB4;ITGB4	5mC	shore	NA
230	chr10	96953447	96953953	2	8.87779e-19	0.29135	0.183206	0.0903015	cg05258264	TSS1500	C10orf129	-	open sea	NA
230	chr10	96953447	96953953	2	8.87779e-19	0.29135	0.183206	0.0903015	cg05964918	TSS200	C10orf129	-	open sea	NA
231	chr15	29431453	29431515	2	9.94609e-09	0.291833	0.131981	0.0561155	cg26225847	Body	FAM189A1	-	open sea	NA
231	chr15	29431453	29431515	2	9.94609e-09	0.291833	0.131981	0.0561155	cg24646554	Body	FAM189A1	-	open sea	NA
232	chr13	30054440	30054557	3	4.43996e-09	0.294293	0.145556	0.0758289	cg07268021	Body;Body	MTUS2;MTUS2	-	island	NA
232	chr13	30054440	30054557	3	4.43996e-09	0.294293	0.145556	0.0758289	cg14365785	Body;Body	MTUS2;MTUS2	-	island	NA
232	chr13	30054440	30054557	3	4.43996e-09	0.294293	0.145556	0.0758289	cg24289821	Body;Body	MTUS2;MTUS2	-	island	NA
233	chr17	80893951	80894243	3	7.36294e-10	0.295096	0.103928	0.0503281	cg25898516	Body	TBCD	-	open sea	NA
233	chr17	80893951	80894243	3	7.36294e-10	0.295096	0.103928	0.0503281	cg12963111	Body	TBCD	-	open sea	NA
233	chr17	80893951	80894243	3	7.36294e-10	0.295096	0.103928	0.0503281	cg14269021	Body	TBCD	-	open sea	NA
233	chr17	80893951	80894243	3	7.36294e-10	0.295096	0.103928	0.0503281	cg10473821	Body	TBCD	-	open sea	NA
234	chr3	170746029	170746586	7	1.53984e-17	0.297346	0.082499	0.0101503	cg03699904	TSS1500	SLC2A2	-	shore	NA
234	chr3	170746029	170746586	7	1.53984e-17	0.297346	0.082499	0.0101503	cg24302235	TSS1500	SLC2A2	-	island	NA
234	chr3	170746029	170746586	7	1.53984e-17	0.297346	0.082499	0.0101503	cg01146875	TSS1500	SLC2A2	-	island	NA
234	chr3	170746029	170746586	7	1.53984e-17	0.297346	0.082499	0.0101503	cg07139301	TSS1500	SLC2A2	-	island	NA
234	chr3	170746029	170746586	7	1.53984e-17	0.297346	0.082499	0.0101503	cg14777768	TSS1500	SLC2A2	-	island	NA
234	chr3	170746029	170746586	7	1.53984e-17	0.297346	0.082499	0.0101503	cg25203962	-	-	-	island	NA
234	chr3	170746029	170746586	7	1.53984e-17	0.297346	0.082499	0.0101503	cg01423389	-	-	-	shore	NA
235	chr12	49318740	49319284	5	3.47828e-10	0.301886	0.078799	0.0307211	cg23699916	1stExon;TSS1500;5'UTR;1stExon;5'UTR	FKBP11;FKBP11;FKBP11;FKBP11;FKBP11	-	island	NA
235	chr12	49318740	49319284	5	3.47828e-10	0.301886	0.078799	0.0307211	cg03059112	1stExon;TSS1500;5'UTR;1stExon;5'UTR	FKBP11;FKBP11;FKBP11;FKBP11;FKBP11	-	island	NA
235	chr12	49318740	49319284	5	3.47828e-10	0.301886	0.078799	0.0307211	cg01612057	Body;Body;TSS200	FKBP11;FKBP11;FKBP11	-	island	NA
235	chr12	49318740	49319284	5	3.47828e-10	0.301886	0.078799	0.0307211	cg22021756	Body;Body;TSS200	FKBP11;FKBP11;FKBP11	-	island	NA
235	chr12	49318740	49319284	5	3.47828e-10	0.301886	0.078799	0.0307211	cg19190217	Body;Body;TSS200	FKBP11;FKBP11;FKBP11	-	island	V$MYCMAX_01;V$NMYC_01;V$USF_Q6
235	chr12	49318740	49319284	5	3.47828e-10	0.301886	0.078799	0.0307211	cg15620146	Body;Body;TSS200	FKBP11;FKBP11;FKBP11	-	island	NA
235	chr12	49318740	49319284	5	3.47828e-10	0.301886	0.078799	0.0307211	cg21908259	Body;TSS1500;Body	FKBP11;FKBP11;FKBP11	-	island	NA
236	chr4	53617784	53617882	2	2.13875e-10	0.307475	0.0348061	0.0140206	cg20704772	-	-	-	shore	NA
236	chr4	53617784	53617882	2	2.13875e-10	0.307475	0.0348061	0.0140206	cg25355316	-	-	-	shore	NA
237	chr4	141564017	141564271	3	6.18329e-10	0.323703	0.182591	0.1011	cg23631385	Body	TBC1D9	5mC	open sea	NA
237	chr4	141564017	141564271	3	6.18329e-10	0.323703	0.182591	0.1011	cg03135535	Body	TBC1D9	5mC	open sea	NA
237	chr4	141564017	141564271	3	6.18329e-10	0.323703	0.182591	0.1011	cg06147143	Body	TBC1D9	-	open sea	NA
238	chr4	53727781	53727979	3	4.52618e-10	0.324866	-0.0509332	-0.0292694	cg26260408	TSS1500	RASL11B	-	shore	NA
238	chr4	53727781	53727979	3	4.52618e-10	0.324866	-0.0509332	-0.0292694	cg03786743	TSS1500	RASL11B	-	shore	NA
238	chr4	53727781	53727979	3	4.52618e-10	0.324866	-0.0509332	-0.0292694	cg00791764	TSS1500	RASL11B	-	shore	NA
239	chr19	1815917	1816405	9	2.13423e-09	0.342651	0.160196	0.0545308	cg23202053	3'UTR	REXO1	5mC	island	NA
239	chr19	1815917	1816405	9	2.13423e-09	0.342651	0.160196	0.0545308	cg20442503	Body;Body	REXO1;MIR1909	5mC	island	NA
239	chr19	1815917	1816405	9	2.13423e-09	0.342651	0.160196	0.0545308	cg02467518	TSS200;Body	MIR1909;REXO1	5mC	island	NA
239	chr19	1815917	1816405	9	2.13423e-09	0.342651	0.160196	0.0545308	cg03413810	TSS200;Body	MIR1909;REXO1	5mC	island	NA
239	chr19	1815917	1816405	9	2.13423e-09	0.342651	0.160196	0.0545308	cg15051795	TSS200;Body	MIR1909;REXO1	5mC	island	NA
239	chr19	1815917	1816405	9	2.13423e-09	0.342651	0.160196	0.0545308	cg24774002	TSS200;Body	MIR1909;REXO1	5mC	island	NA
239	chr19	1815917	1816405	9	2.13423e-09	0.342651	0.160196	0.0545308	cg27091642	TSS200;Body	MIR1909;REXO1	5mC	island	NA
239	chr19	1815917	1816405	9	2.13423e-09	0.342651	0.160196	0.0545308	cg01386868	TSS200;Body	MIR1909;REXO1	5mC	island	NA
239	chr19	1815917	1816405	9	2.13423e-09	0.342651	0.160196	0.0545308	cg02368428	TSS200;Body	MIR1909;REXO1	5mC	island	NA
240	chr6	30019518	30019916	2	1.12027e-26	0.34403	0.191053	0.0931268	cg05949877	Body	NCRNA00171	-	open sea	NA
240	chr6	30019518	30019916	2	1.12027e-26	0.34403	0.191053	0.0931268	cg05136139	Body	NCRNA00171	-	open sea	NA
241	chr10	71332776	71333556	7	1.85622e-10	0.349786	-0.0502007	-0.0133551	cg17583413	5'UTR	NEUROG3	-	island	NA
241	chr10	71332776	71333556	7	1.85622e-10	0.349786	-0.0502007	-0.0133551	cg03425110	5'UTR;1stExon	NEUROG3;NEUROG3	-	island	NA
241	chr10	71332776	71333556	7	1.85622e-10	0.349786	-0.0502007	-0.0133551	cg12938159	Body	NEUROG3	-	island	NA
241	chr10	71332776	71333556	7	1.85622e-10	0.349786	-0.0502007	-0.0133551	cg09154558	TSS1500	NEUROG3	-	shore	NA
241	chr10	71332776	71333556	7	1.85622e-10	0.349786	-0.0502007	-0.0133551	cg18834338	TSS200	NEUROG3	-	island	NA
241	chr10	71332776	71333556	7	1.85622e-10	0.349786	-0.0502007	-0.0133551	cg05886671	TSS200	NEUROG3	-	island	NA
241	chr10	71332776	71333556	7	1.85622e-10	0.349786	-0.0502007	-0.0133551	cg07647353	TSS200	NEUROG3	-	island	NA
241	chr10	71332776	71333556	7	1.85622e-10	0.349786	-0.0502007	-0.0133551	cg06043042	TSS200	NEUROG3	-	island	V$GATA1_04
241	chr10	71332776	71333556	7	1.85622e-10	0.349786	-0.0502007	-0.0133551	cg02262662	TSS200	NEUROG3	-	island	NA
242	chr18	19284821	19285336	4	7.19033e-11	0.352868	-0.0343257	-0.0137732	cg15533222	TSS1500	ABHD3	-	island	NA
242	chr18	19284821	19285336	4	7.19033e-11	0.352868	-0.0343257	-0.0137732	cg05378295	TSS1500	ABHD3	-	island	NA
242	chr18	19284821	19285336	4	7.19033e-11	0.352868	-0.0343257	-0.0137732	cg10690887	TSS1500	ABHD3	-	island	NA
242	chr18	19284821	19285336	4	7.19033e-11	0.352868	-0.0343257	-0.0137732	cg03393602	TSS1500	ABHD3	-	shore	NA
242	chr18	19284821	19285336	4	7.19033e-11	0.352868	-0.0343257	-0.0137732	cg25680245	TSS200	ABHD3	-	island	NA
242	chr18	19284821	19285336	4	7.19033e-11	0.352868	-0.0343257	-0.0137732	cg06967703	TSS200	ABHD3	-	island	NA
242	chr18	19284821	19285336	4	7.19033e-11	0.352868	-0.0343257	-0.0137732	cg13628146	TSS200	ABHD3	-	island	NA
243	chr19	3753931	3754703	4	3.57524e-11	0.354311	0.152055	0.0919119	cg08603735	Body	APBA3	-	island	V$AP4_01
243	chr19	3753931	3754703	4	3.57524e-11	0.354311	0.152055	0.0919119	cg04202570	Body	APBA3	-	island	NA
243	chr19	3753931	3754703	4	3.57524e-11	0.354311	0.152055	0.0919119	cg27267436	Body	APBA3	-	island	NA
243	chr19	3753931	3754703	4	3.57524e-11	0.354311	0.152055	0.0919119	cg14799489	Body	APBA3	-	shore	NA
244	chr8	143427631	143427976	4	2.18809e-10	0.367033	0.199758	0.0845701	cg06454464	Body	TSNARE1	5mC	shore	NA
244	chr8	143427631	143427976	4	2.18809e-10	0.367033	0.199758	0.0845701	cg22931466	Body	TSNARE1	5mC	shore	NA
244	chr8	143427631	143427976	4	2.18809e-10	0.367033	0.199758	0.0845701	cg11926839	Body	TSNARE1	5mC	shore	NA
244	chr8	143427631	143427976	4	2.18809e-10	0.367033	0.199758	0.0845701	cg17372408	Body	TSNARE1	5mC	shore	NA
244	chr8	143427631	143427976	4	2.18809e-10	0.367033	0.199758	0.0845701	cg23890910	Body	TSNARE1	5mC	shore	NA
245	chr19	51486901	51487968	11	1.71217e-15	0.367626	-0.129658	-0.0288626	cg19471655	5'UTR;1stExon;TSS200	KLK7;KLK7;KLK7	BS	open sea	NA
245	chr19	51486901	51487968	11	1.71217e-15	0.367626	-0.129658	-0.0288626	cg06258834	5'UTR;1stExon;TSS200	KLK7;KLK7;KLK7	BS	open sea	NA
245	chr19	51486901	51487968	11	1.71217e-15	0.367626	-0.129658	-0.0288626	cg19953406	TSS1500;TSS1500	KLK7;KLK7	BS	open sea	NA
245	chr19	51486901	51487968	11	1.71217e-15	0.367626	-0.129658	-0.0288626	cg26172504	TSS1500;TSS1500	KLK7;KLK7	BS	open sea	NA
245	chr19	51486901	51487968	11	1.71217e-15	0.367626	-0.129658	-0.0288626	cg27021492	TSS1500;TSS1500	KLK7;KLK7	BS	open sea	NA
245	chr19	51486901	51487968	11	1.71217e-15	0.367626	-0.129658	-0.0288626	cg15732230	TSS200;TSS1500	KLK7;KLK7	BS	open sea	NA
245	chr19	51486901	51487968	11	1.71217e-15	0.367626	-0.129658	-0.0288626	cg27497839	TSS200;TSS1500	KLK7;KLK7	BS	open sea	NA
245	chr19	51486901	51487968	11	1.71217e-15	0.367626	-0.129658	-0.0288626	cg06707544	TSS200;TSS200	KLK7;KLK7	BS	open sea	V$OLF1_01;V$ROAZ_01
245	chr19	51486901	51487968	11	1.71217e-15	0.367626	-0.129658	-0.0288626	cg26241993	TSS200;TSS200	KLK7;KLK7	BS	open sea	V$OLF1_01
245	chr19	51486901	51487968	11	1.71217e-15	0.367626	-0.129658	-0.0288626	cg22044892	5'UTR;5'UTR	KLK7;KLK7	-	open sea	NA
245	chr19	51486901	51487968	11	1.71217e-15	0.367626	-0.129658	-0.0288626	cg17103314	TSS1500;TSS1500	KLK7;KLK7	-	open sea	NA
246	chr1	151763931	151764147	3	5.4932e-13	0.368683	-0.249742	-0.0872103	cg20686828	TSS1500;TSS1500;TSS1500;TSS1500	TDRKH;TDRKH;TDRKH;TDRKH	BS	shore	NA
246	chr1	151763931	151764147	3	5.4932e-13	0.368683	-0.249742	-0.0872103	cg20227763	TSS1500;TSS1500;TSS1500;TSS1500	TDRKH;TDRKH;TDRKH;TDRKH	BS	island	NA
246	chr1	151763931	151764147	3	5.4932e-13	0.368683	-0.249742	-0.0872103	cg18086761	TSS1500;TSS1500;TSS1500;TSS1500	TDRKH;TDRKH;TDRKH;TDRKH	BS	island	NA
247	chr19	54242124	54242243	2	1.27451e-11	0.382479	0.114175	0.0514707	cg09430586	TSS1500	MIR518A2	5mC	open sea	NA
247	chr19	54242124	54242243	2	1.27451e-11	0.382479	0.114175	0.0514707	cg02336334	TSS1500	MIR518A2	5mC	open sea	NA
248	chr11	1855286	1856307	12	2.32409e-16	0.382753	0.106108	0.0407556	cg03861143	1stExon;5'UTR	SYT8;SYT8	-	open sea	NA
248	chr11	1855286	1856307	12	2.32409e-16	0.382753	0.106108	0.0407556	cg17046756	Body	SYT8	-	open sea	NA
248	chr11	1855286	1856307	12	2.32409e-16	0.382753	0.106108	0.0407556	cg03164969	Body	SYT8	-	open sea	NA
248	chr11	1855286	1856307	12	2.32409e-16	0.382753	0.106108	0.0407556	cg08137852	Body	SYT8	-	open sea	NA
248	chr11	1855286	1856307	12	2.32409e-16	0.382753	0.106108	0.0407556	cg11368628	Body	SYT8	-	open sea	NA
248	chr11	1855286	1856307	12	2.32409e-16	0.382753	0.106108	0.0407556	cg26473272	Body	SYT8	-	open sea	NA
248	chr11	1855286	1856307	12	2.32409e-16	0.382753	0.106108	0.0407556	cg03044344	Body	SYT8	-	open sea	NA
248	chr11	1855286	1856307	12	2.32409e-16	0.382753	0.106108	0.0407556	cg20363586	TSS1500	SYT8	-	open sea	NA
248	chr11	1855286	1856307	12	2.32409e-16	0.382753	0.106108	0.0407556	cg18122696	TSS1500	SYT8	-	open sea	NA
248	chr11	1855286	1856307	12	2.32409e-16	0.382753	0.106108	0.0407556	cg02294791	TSS200	SYT8	-	open sea	NA
248	chr11	1855286	1856307	12	2.32409e-16	0.382753	0.106108	0.0407556	cg16657886	TSS200	SYT8	-	open sea	NA
248	chr11	1855286	1856307	12	2.32409e-16	0.382753	0.106108	0.0407556	cg09575189	TSS200	SYT8	-	open sea	NA
248	chr11	1855286	1856307	12	2.32409e-16	0.382753	0.106108	0.0407556	cg24331162	TSS200	SYT8	-	open sea	NA
249	chr18	77395326	77395435	3	2.56372e-09	0.383392	0.082739	0.00680878	cg02424539	-	-	-	island	NA
249	chr18	77395326	77395435	3	2.56372e-09	0.383392	0.082739	0.00680878	cg14086908	-	-	-	island	NA
249	chr18	77395326	77395435	3	2.56372e-09	0.383392	0.082739	0.00680878	cg05961160	-	-	-	island	NA
250	chr8	144773877	144774308	2	6.56783e-13	0.384186	0.0983501	0.0561443	cg02479691	Body;Body;Body	ZNF707;ZNF707;ZNF707	-	shelf	NA
250	chr8	144773877	144774308	2	6.56783e-13	0.384186	0.0983501	0.0561443	cg20984614	Body;Body;Body	ZNF707;ZNF707;ZNF707	-	shore	NA
251	chr6	33131222	33132241	16	2.5614e-13	0.391002	0.146562	0.0457749	cg26998481	3'UTR;3'UTR;3'UTR	COL11A2;COL11A2;COL11A2	5mC	shore	NA
251	chr6	33131222	33132241	16	2.5614e-13	0.391002	0.146562	0.0457749	cg17931986	3'UTR;3'UTR;3'UTR	COL11A2;COL11A2;COL11A2	5mC	shore	NA
251	chr6	33131222	33132241	16	2.5614e-13	0.391002	0.146562	0.0457749	cg01881428	3'UTR;3'UTR;3'UTR	COL11A2;COL11A2;COL11A2	5mC	shore	NA
251	chr6	33131222	33132241	16	2.5614e-13	0.391002	0.146562	0.0457749	cg02304614	3'UTR;3'UTR;3'UTR	COL11A2;COL11A2;COL11A2	5mC	shore	NA
251	chr6	33131222	33132241	16	2.5614e-13	0.391002	0.146562	0.0457749	cg07703081	3'UTR;3'UTR;3'UTR	COL11A2;COL11A2;COL11A2	5mC	shore	NA
251	chr6	33131222	33132241	16	2.5614e-13	0.391002	0.146562	0.0457749	cg04249605	Body;Body;Body	COL11A2;COL11A2;COL11A2	5mC	shore	NA
251	chr6	33131222	33132241	16	2.5614e-13	0.391002	0.146562	0.0457749	cg12881453	Body;Body;Body	COL11A2;COL11A2;COL11A2	5mC	shelf	NA
251	chr6	33131222	33132241	16	2.5614e-13	0.391002	0.146562	0.0457749	cg04464727	Body;Body;Body	COL11A2;COL11A2;COL11A2	5mC	shelf	NA
251	chr6	33131222	33132241	16	2.5614e-13	0.391002	0.146562	0.0457749	cg08077736	Body;Body;Body	COL11A2;COL11A2;COL11A2	5mC	shelf	NA
251	chr6	33131222	33132241	16	2.5614e-13	0.391002	0.146562	0.0457749	cg10390980	Body;Body;Body	COL11A2;COL11A2;COL11A2	5mC	shelf	NA
251	chr6	33131222	33132241	16	2.5614e-13	0.391002	0.146562	0.0457749	cg14782559	Body;Body;Body	COL11A2;COL11A2;COL11A2	5mC	shelf	NA
251	chr6	33131222	33132241	16	2.5614e-13	0.391002	0.146562	0.0457749	cg01533585	Body;Body;Body	COL11A2;COL11A2;COL11A2	-	shelf	NA
251	chr6	33131222	33132241	16	2.5614e-13	0.391002	0.146562	0.0457749	cg07570257	Body;Body;Body	COL11A2;COL11A2;COL11A2	-	shelf	NA
251	chr6	33131222	33132241	16	2.5614e-13	0.391002	0.146562	0.0457749	cg14147420	Body;Body;Body	COL11A2;COL11A2;COL11A2	-	shelf	NA
251	chr6	33131222	33132241	16	2.5614e-13	0.391002	0.146562	0.0457749	cg12945707	Body;Body;Body	COL11A2;COL11A2;COL11A2	-	shelf	NA
252	chr8	72468987	72469560	5	5.05189e-17	0.406283	-0.0889613	-0.0345286	cg17943279	-	-	-	island	NA
252	chr8	72468987	72469560	5	5.05189e-17	0.406283	-0.0889613	-0.0345286	cg08795964	-	-	-	island	NA
252	chr8	72468987	72469560	5	5.05189e-17	0.406283	-0.0889613	-0.0345286	cg26947626	-	-	-	island	NA
252	chr8	72468987	72469560	5	5.05189e-17	0.406283	-0.0889613	-0.0345286	cg11878331	-	-	-	island	NA
252	chr8	72468987	72469560	5	5.05189e-17	0.406283	-0.0889613	-0.0345286	cg18855674	-	-	-	island	NA
253	chr7	151542050	151542452	4	1.92259e-16	0.419262	0.16934	0.0710014	cg06996555	Body	PRKAG2	-	open sea	NA
253	chr7	151542050	151542452	4	1.92259e-16	0.419262	0.16934	0.0710014	cg20406576	Body	PRKAG2	-	open sea	NA
253	chr7	151542050	151542452	4	1.92259e-16	0.419262	0.16934	0.0710014	cg05890154	Body	PRKAG2	-	open sea	NA
253	chr7	151542050	151542452	4	1.92259e-16	0.419262	0.16934	0.0710014	cg13810766	Body	PRKAG2	-	open sea	NA
254	chr7	2105368	2105443	3	4.21769e-09	0.428992	0.241151	0.0788018	cg19513987	Body;Body;Body	MAD1L1;MAD1L1;MAD1L1	-	shore	NA
254	chr7	2105368	2105443	3	4.21769e-09	0.428992	0.241151	0.0788018	cg09075743	Body;Body;Body	MAD1L1;MAD1L1;MAD1L1	-	shore	NA
254	chr7	2105368	2105443	3	4.21769e-09	0.428992	0.241151	0.0788018	cg13868473	Body;Body;Body	MAD1L1;MAD1L1;MAD1L1	-	shore	NA
255	chr6	30121774	30122947	13	2.42846e-30	0.447604	0.0990948	0.0343865	cg05266816	Body;Body	TRIM10;TRIM10	5mC	open sea	NA
255	chr6	30121774	30122947	13	2.42846e-30	0.447604	0.0990948	0.0343865	cg11553183	Body;Body	TRIM10;TRIM10	5mC, BS	open sea	NA
255	chr6	30121774	30122947	13	2.42846e-30	0.447604	0.0990948	0.0343865	cg18267047	Body;Body	TRIM10;TRIM10	5mC, BS	open sea	NA
255	chr6	30121774	30122947	13	2.42846e-30	0.447604	0.0990948	0.0343865	cg05762309	Body;Body	TRIM10;TRIM10	5mC, BS	open sea	NA
255	chr6	30121774	30122947	13	2.42846e-30	0.447604	0.0990948	0.0343865	cg03957649	Body;Body	TRIM10;TRIM10	5mC, BS	open sea	NA
255	chr6	30121774	30122947	13	2.42846e-30	0.447604	0.0990948	0.0343865	cg08513123	Body;Body	TRIM10;TRIM10	5mC, BS	open sea	NA
255	chr6	30121774	30122947	13	2.42846e-30	0.447604	0.0990948	0.0343865	cg24329658	Body;Body	TRIM10;TRIM10	5mC, BS	open sea	NA
255	chr6	30121774	30122947	13	2.42846e-30	0.447604	0.0990948	0.0343865	cg27119877	Body;Body	TRIM10;TRIM10	5mC, BS	open sea	NA
255	chr6	30121774	30122947	13	2.42846e-30	0.447604	0.0990948	0.0343865	cg08508724	Body;Body	TRIM10;TRIM10	5mC, BS	open sea	NA
255	chr6	30121774	30122947	13	2.42846e-30	0.447604	0.0990948	0.0343865	cg06111486	Body;Body	TRIM10;TRIM10	5mC, BS	open sea	NA
255	chr6	30121774	30122947	13	2.42846e-30	0.447604	0.0990948	0.0343865	cg01748268	Body;Body	TRIM10;TRIM10	5mC, BS	open sea	NA
255	chr6	30121774	30122947	13	2.42846e-30	0.447604	0.0990948	0.0343865	cg16206678	Body;Body	TRIM10;TRIM10	5mC, BS	open sea	NA
255	chr6	30121774	30122947	13	2.42846e-30	0.447604	0.0990948	0.0343865	cg27000368	Body;Body	TRIM10;TRIM10	5mC, BS	open sea	NA
255	chr6	30121774	30122947	13	2.42846e-30	0.447604	0.0990948	0.0343865	cg08094206	Body;Body	TRIM10;TRIM10	5mC, BS	open sea	NA
255	chr6	30121774	30122947	13	2.42846e-30	0.447604	0.0990948	0.0343865	cg07873154	Body;Body	TRIM10;TRIM10	5mC, BS	open sea	NA
255	chr6	30121774	30122947	13	2.42846e-30	0.447604	0.0990948	0.0343865	cg24847621	Body;Body	TRIM10;TRIM10	5mC, BS	open sea	NA
256	chr5	141488016	141488121	4	8.86116e-10	0.449381	-0.0902182	-0.0352285	cg23435118	TSS1500	NDFIP1	-	shore	NA
256	chr5	141488016	141488121	4	8.86116e-10	0.449381	-0.0902182	-0.0352285	cg08523384	TSS1500	NDFIP1	-	shore	NA
256	chr5	141488016	141488121	4	8.86116e-10	0.449381	-0.0902182	-0.0352285	cg00609948	TSS1500	NDFIP1	-	shore	NA
256	chr5	141488016	141488121	4	8.86116e-10	0.449381	-0.0902182	-0.0352285	cg13490971	TSS1500	NDFIP1	-	shore	NA
257	chr11	87908192	87908897	8	4.51992e-11	0.453026	0.0925634	0.00375808	cg17285922	1stExon;5'UTR	RAB38;RAB38	-	island	NA
257	chr11	87908192	87908897	8	4.51992e-11	0.453026	0.0925634	0.00375808	cg01761409	Body	RAB38	-	shore	NA
257	chr11	87908192	87908897	8	4.51992e-11	0.453026	0.0925634	0.00375808	cg17108629	TSS1500	RAB38	-	shore	NA
257	chr11	87908192	87908897	8	4.51992e-11	0.453026	0.0925634	0.00375808	cg22096687	TSS1500	RAB38	-	shore	NA
257	chr11	87908192	87908897	8	4.51992e-11	0.453026	0.0925634	0.00375808	cg00027674	TSS1500	RAB38	-	shore	NA
257	chr11	87908192	87908897	8	4.51992e-11	0.453026	0.0925634	0.00375808	cg14428310	TSS200	RAB38	-	shore	NA
257	chr11	87908192	87908897	8	4.51992e-11	0.453026	0.0925634	0.00375808	cg04653522	TSS200	RAB38	-	shore	NA
257	chr11	87908192	87908897	8	4.51992e-11	0.453026	0.0925634	0.00375808	cg01568784	TSS200	RAB38	-	shore	NA
257	chr11	87908192	87908897	8	4.51992e-11	0.453026	0.0925634	0.00375808	cg18395636	TSS200	RAB38	-	shore	NA
258	chr7	150210742	150211152	3	3.93056e-11	0.46053	0.0807537	0.046982	cg01444712	TSS1500	GIMAP7	-	open sea	NA
258	chr7	150210742	150211152	3	3.93056e-11	0.46053	0.0807537	0.046982	cg05597504	TSS1500	GIMAP7	-	open sea	NA
258	chr7	150210742	150211152	3	3.93056e-11	0.46053	0.0807537	0.046982	cg15704358	TSS1500	GIMAP7	-	open sea	NA
258	chr7	150210742	150211152	3	3.93056e-11	0.46053	0.0807537	0.046982	cg08037327	TSS1500	GIMAP7	-	open sea	NA
258	chr7	150210742	150211152	3	3.93056e-11	0.46053	0.0807537	0.046982	cg01827098	TSS1500	GIMAP7	-	open sea	NA
259	chr6	166666078	166666210	2	5.66696e-11	0.463783	0.069507	0.0362795	cg03351580	-	-	-	shore	NA
259	chr6	166666078	166666210	2	5.66696e-11	0.463783	0.069507	0.0362795	cg25152411	-	-	-	shore	NA
260	chr6	30656499	30656667	5	1.83962e-09	0.474418	0.148173	0.076076	cg14646977	Body;TSS1500	NRM;KIAA1949	5mC	shore	NA
260	chr6	30656499	30656667	5	1.83962e-09	0.474418	0.148173	0.076076	cg08743794	TSS1500;Body;TSS1500	KIAA1949;NRM;KIAA1949	5mC	shore	NA
260	chr6	30656499	30656667	5	1.83962e-09	0.474418	0.148173	0.076076	cg03922146	TSS1500;Body;TSS1500	KIAA1949;NRM;KIAA1949	5mC	shore	NA
260	chr6	30656499	30656667	5	1.83962e-09	0.474418	0.148173	0.076076	cg24710951	TSS1500;Body;TSS1500	KIAA1949;NRM;KIAA1949	5mC	shore	NA
260	chr6	30656499	30656667	5	1.83962e-09	0.474418	0.148173	0.076076	cg26004235	TSS1500;Body;TSS1500	KIAA1949;NRM;KIAA1949	5mC	shore	NA
261	chr10	131213990	131214585	7	1.58963e-11	0.475672	0.164109	0.0604394	cg27523644	-	-	-	open sea	NA
261	chr10	131213990	131214585	7	1.58963e-11	0.475672	0.164109	0.0604394	cg26010877	-	-	-	open sea	NA
261	chr10	131213990	131214585	7	1.58963e-11	0.475672	0.164109	0.0604394	cg05489054	-	-	-	open sea	NA
261	chr10	131213990	131214585	7	1.58963e-11	0.475672	0.164109	0.0604394	cg25425089	-	-	-	open sea	NA
261	chr10	131213990	131214585	7	1.58963e-11	0.475672	0.164109	0.0604394	cg15531536	-	-	-	open sea	NA
261	chr10	131213990	131214585	7	1.58963e-11	0.475672	0.164109	0.0604394	cg20432754	-	-	-	open sea	NA
261	chr10	131213990	131214585	7	1.58963e-11	0.475672	0.164109	0.0604394	cg11826295	-	-	-	open sea	NA
262	chr6	31854633	31854849	6	9.59575e-09	0.481488	0.104473	0.038739	cg25853673	Body;Body	EHMT2;EHMT2	-	shelf	NA
262	chr6	31854633	31854849	6	9.59575e-09	0.481488	0.104473	0.038739	cg21141346	Body;Body	EHMT2;EHMT2	-	shelf	NA
262	chr6	31854633	31854849	6	9.59575e-09	0.481488	0.104473	0.038739	cg22999989	Body;Body	EHMT2;EHMT2	-	shelf	NA
262	chr6	31854633	31854849	6	9.59575e-09	0.481488	0.104473	0.038739	cg17750075	Body;Body	EHMT2;EHMT2	-	shelf	V$AHRARNT_02
262	chr6	31854633	31854849	6	9.59575e-09	0.481488	0.104473	0.038739	cg19647155	Body;Body	EHMT2;EHMT2	-	shelf	V$AHRARNT_02;V$EGR1_01
262	chr6	31854633	31854849	6	9.59575e-09	0.481488	0.104473	0.038739	cg18644481	Body;Body	EHMT2;EHMT2	-	shelf	NA
263	chr16	67695516	67696204	13	4.80848e-16	0.491784	0.228993	0.0609016	cg09268125	Body;TSS1500;TSS1500;Body;TSS1500	PARD6A;ACD;ACD;PARD6A;ACD	5mC	shore	NA
263	chr16	67695516	67696204	13	4.80848e-16	0.491784	0.228993	0.0609016	cg26685294	Body;TSS1500;TSS1500;Body;TSS1500	PARD6A;ACD;ACD;PARD6A;ACD	5mC	shore	NA
263	chr16	67695516	67696204	13	4.80848e-16	0.491784	0.228993	0.0609016	cg26919100	Body;TSS1500;TSS1500;Body;TSS1500	PARD6A;ACD;ACD;PARD6A;ACD	5mC	island	NA
263	chr16	67695516	67696204	13	4.80848e-16	0.491784	0.228993	0.0609016	cg09321029	Body;TSS1500;TSS1500;Body;TSS1500	PARD6A;ACD;ACD;PARD6A;ACD	5mC	shore	NA
263	chr16	67695516	67696204	13	4.80848e-16	0.491784	0.228993	0.0609016	cg07492143	Body;TSS1500;TSS1500;Body;TSS1500	PARD6A;ACD;ACD;PARD6A;ACD	5mC	shore	NA
263	chr16	67695516	67696204	13	4.80848e-16	0.491784	0.228993	0.0609016	cg20707345	Body;TSS1500;TSS1500;Body;TSS1500	PARD6A;ACD;ACD;PARD6A;ACD	5mC	shore	NA
263	chr16	67695516	67696204	13	4.80848e-16	0.491784	0.228993	0.0609016	cg07469744	Body;TSS1500;TSS1500;Body;TSS1500	PARD6A;ACD;ACD;PARD6A;ACD	5mC	shore	NA
263	chr16	67695516	67696204	13	4.80848e-16	0.491784	0.228993	0.0609016	cg26988853	Body;TSS1500;TSS1500;Body;TSS1500	PARD6A;ACD;ACD;PARD6A;ACD	5mC	shore	NA
263	chr16	67695516	67696204	13	4.80848e-16	0.491784	0.228993	0.0609016	cg26698580	Body;TSS1500;TSS1500;Body;TSS1500	PARD6A;ACD;ACD;PARD6A;ACD	5mC	shore	NA
263	chr16	67695516	67696204	13	4.80848e-16	0.491784	0.228993	0.0609016	cg03934313	Body;TSS1500;TSS1500;Body;TSS1500	PARD6A;ACD;ACD;PARD6A;ACD	5mC	shore	NA
263	chr16	67695516	67696204	13	4.80848e-16	0.491784	0.228993	0.0609016	cg27219874	Body;TSS1500;TSS1500;Body;TSS1500	PARD6A;ACD;ACD;PARD6A;ACD	5mC	shore	NA
263	chr16	67695516	67696204	13	4.80848e-16	0.491784	0.228993	0.0609016	cg04788956	Body;TSS1500;TSS1500;Body;TSS1500	PARD6A;ACD;ACD;PARD6A;ACD	5mC	shore	V$COMP1_01
263	chr16	67695516	67696204	13	4.80848e-16	0.491784	0.228993	0.0609016	cg00318436	Body;TSS1500;TSS1500;Body;TSS1500	PARD6A;ACD;ACD;PARD6A;ACD	5mC	shore	NA
263	chr16	67695516	67696204	13	4.80848e-16	0.491784	0.228993	0.0609016	cg04607024	Body;TSS1500;TSS1500;Body;TSS1500	PARD6A;ACD;ACD;PARD6A;ACD	5mC	shore	NA
264	chr10	99609716	99609860	2	1.02427e-12	0.495073	0.0364034	0.0182651	cg10575133	TSS1500	GOLGA7B	-	island	NA
264	chr10	99609716	99609860	2	1.02427e-12	0.495073	0.0364034	0.0182651	cg19440955	TSS200	GOLGA7B	-	island	V$PAX5_02
264	chr10	99609716	99609860	2	1.02427e-12	0.495073	0.0364034	0.0182651	cg04531794	TSS200	GOLGA7B	-	island	NA
265	chr5	177539937	177539998	2	4.93111e-10	0.496419	0.097212	0.0356394	cg27035514	TSS1500	N4BP3	-	shore	NA
265	chr5	177539937	177539998	2	4.93111e-10	0.496419	0.097212	0.0356394	cg20559537	TSS1500	N4BP3	-	shore	NA
266	chr11	68772710	68773285	5	1.30576e-20	0.501753	0.111665	0.0326817	cg01165177	3'UTR;3'UTR	MRGPRF;MRGPRF	-	shore	NA
266	chr11	68772710	68773285	5	1.30576e-20	0.501753	0.111665	0.0326817	cg16538343	Body;Body	MRGPRF;MRGPRF	-	island	NA
266	chr11	68772710	68773285	5	1.30576e-20	0.501753	0.111665	0.0326817	cg01169746	Body;Body	MRGPRF;MRGPRF	-	island	NA
266	chr11	68772710	68773285	5	1.30576e-20	0.501753	0.111665	0.0326817	cg17299921	Body;Body	MRGPRF;MRGPRF	-	shore	NA
266	chr11	68772710	68773285	5	1.30576e-20	0.501753	0.111665	0.0326817	cg22510814	Body;Body	MRGPRF;MRGPRF	-	island	NA
267	chr1	3620638	3621445	3	2.39232e-20	0.501833	0.123497	0.04991	cg19819912	Body;Body;Body;Body	TP73;TP73;TP73;TP73	-	shelf	NA
267	chr1	3620638	3621445	3	2.39232e-20	0.501833	0.123497	0.04991	cg00505606	Body;Body;Body;Body	TP73;TP73;TP73;TP73	-	shelf	NA
267	chr1	3620638	3621445	3	2.39232e-20	0.501833	0.123497	0.04991	cg06996273	Body;Body;Body;Body	TP73;TP73;TP73;TP73	-	shelf	NA
267	chr1	3620638	3621445	3	2.39232e-20	0.501833	0.123497	0.04991	cg03103850	Body;Body;Body;Body	TP73;TP73;TP73;TP73	-	shelf	NA
267	chr1	3620638	3621445	3	2.39232e-20	0.501833	0.123497	0.04991	cg19692322	Body;Body;Body;Body	TP73;TP73;TP73;TP73	-	shelf	NA
267	chr1	3620638	3621445	3	2.39232e-20	0.501833	0.123497	0.04991	cg06646112	Body;Body;Body;Body	TP73;TP73;TP73;TP73	-	shore	NA
268	chr4	1052158	1052717	5	5.18564e-10	0.506317	0.124909	0.0474232	cg20531169	-	-	5mC	shelf	NA
268	chr4	1052158	1052717	5	5.18564e-10	0.506317	0.124909	0.0474232	cg13180566	-	-	5mC	shelf	NA
268	chr4	1052158	1052717	5	5.18564e-10	0.506317	0.124909	0.0474232	cg04423820	-	-	5mC	shelf	NA
268	chr4	1052158	1052717	5	5.18564e-10	0.506317	0.124909	0.0474232	cg15377758	-	-	5mC	shelf	NA
268	chr4	1052158	1052717	5	5.18564e-10	0.506317	0.124909	0.0474232	cg24696728	-	-	5mC	shelf	NA
269	chr2	175198664	175198952	3	9.18452e-09	0.512384	-0.028375	-0.0145382	cg03805618	TSS1500	SP9	-	shore	NA
269	chr2	175198664	175198952	3	9.18452e-09	0.512384	-0.028375	-0.0145382	cg06212224	TSS1500	SP9	-	shore	NA
269	chr2	175198664	175198952	3	9.18452e-09	0.512384	-0.028375	-0.0145382	cg00928397	TSS1500	SP9	-	shore	NA
270	chr11	76381971	76382128	2	1.16789e-09	0.513015	0.0177615	0.0101394	cg01187562	TSS1500;TSS1500	LRRC32;LRRC32	-	island	NA
270	chr11	76381971	76382128	2	1.16789e-09	0.513015	0.0177615	0.0101394	cg01691530	TSS1500;TSS200	LRRC32;LRRC32	-	island	NA
271	chr12	54354974	54355476	4	1.76972e-14	0.516068	-0.0576311	-0.0195909	cg01524278	-	-	-	island	NA
271	chr12	54354974	54355476	4	1.76972e-14	0.516068	-0.0576311	-0.0195909	cg03078269	-	-	-	island	NA
271	chr12	54354974	54355476	4	1.76972e-14	0.516068	-0.0576311	-0.0195909	cg26809635	-	-	-	island	NA
271	chr12	54354974	54355476	4	1.76972e-14	0.516068	-0.0576311	-0.0195909	cg19188855	-	-	-	island	NA
272	chr8	124657935	124658143	2	1.14544e-14	0.518565	0.0739338	0.037827	cg14113569	3'UTR	KLHL38	-	open sea	NA
272	chr8	124657935	124658143	2	1.14544e-14	0.518565	0.0739338	0.037827	cg13477525	Body	KLHL38	-	open sea	NA
272	chr8	124657935	124658143	2	1.14544e-14	0.518565	0.0739338	0.037827	cg25302730	Body	KLHL38	-	open sea	NA
272	chr8	124657935	124658143	2	1.14544e-14	0.518565	0.0739338	0.037827	cg16783412	Body	KLHL38	-	open sea	NA
273	chr1	18959354	18959427	2	1.24154e-09	0.520785	-0.0391737	-0.0267021	cg00855990	Body;Body;Body	PAX7;PAX7;PAX7	-	island	NA
273	chr1	18959354	18959427	2	1.24154e-09	0.520785	-0.0391737	-0.0267021	cg09670535	Body;Body;Body	PAX7;PAX7;PAX7	-	island	NA
274	chr16	1574269	1574590	2	1.41041e-10	0.521458	0.1194	0.053586	cg27503499	Body	IFT140	5mC	shore	NA
274	chr16	1574269	1574590	2	1.41041e-10	0.521458	0.1194	0.053586	cg00374546	Body	IFT140	5mC	island	NA
275	chr6	10415653	10416531	8	6.35113e-15	0.532319	-0.0959791	-0.0220098	cg23535596	Body;TSS1500	TFAP2A;TFAP2A	-	shore	NA
275	chr6	10415653	10416531	8	6.35113e-15	0.532319	-0.0959791	-0.0220098	cg24902920	Body;TSS1500	TFAP2A;TFAP2A	-	shore	NA
275	chr6	10415653	10416531	8	6.35113e-15	0.532319	-0.0959791	-0.0220098	cg16226962	Body;TSS1500	TFAP2A;TFAP2A	-	shore	NA
275	chr6	10415653	10416531	8	6.35113e-15	0.532319	-0.0959791	-0.0220098	cg09255586	Body;TSS1500	TFAP2A;TFAP2A	-	shore	NA
275	chr6	10415653	10416531	8	6.35113e-15	0.532319	-0.0959791	-0.0220098	cg20540714	Body;TSS1500	TFAP2A;TFAP2A	-	shore	NA
275	chr6	10415653	10416531	8	6.35113e-15	0.532319	-0.0959791	-0.0220098	cg10899301	Body;TSS1500	TFAP2A;TFAP2A	-	shore	NA
275	chr6	10415653	10416531	8	6.35113e-15	0.532319	-0.0959791	-0.0220098	cg13373589	Body;TSS1500	TFAP2A;TFAP2A	-	shore	NA
275	chr6	10415653	10416531	8	6.35113e-15	0.532319	-0.0959791	-0.0220098	cg06880667	Body;TSS1500	TFAP2A;TFAP2A	-	shore	NA
275	chr6	10415653	10416531	8	6.35113e-15	0.532319	-0.0959791	-0.0220098	cg13298147	Body;TSS1500	TFAP2A;TFAP2A	-	shore	NA
275	chr6	10415653	10416531	8	6.35113e-15	0.532319	-0.0959791	-0.0220098	cg27283345	Body;TSS1500	TFAP2A;TFAP2A	-	shore	NA
275	chr6	10415653	10416531	8	6.35113e-15	0.532319	-0.0959791	-0.0220098	cg11063729	Body;TSS200	TFAP2A;TFAP2A	-	shore	NA
275	chr6	10415653	10416531	8	6.35113e-15	0.532319	-0.0959791	-0.0220098	cg14909730	Body;TSS200	TFAP2A;TFAP2A	-	shore	NA
276	chr15	101586790	101587053	2	7.16192e-11	0.53321	0.173999	0.0825957	cg14590214	Body	LRRK1	5mC	open sea	NA
276	chr15	101586790	101587053	2	7.16192e-11	0.53321	0.173999	0.0825957	cg08750547	Body	LRRK1	5mC	open sea	NA
277	chr20	42294903	42296114	5	7.01756e-25	0.53969	-0.0446552	-0.0163365	cg09604203	Body	MYBL2	-	island	NA
277	chr20	42294903	42296114	5	7.01756e-25	0.53969	-0.0446552	-0.0163365	cg24924731	TSS1500	MYBL2	-	shore	NA
277	chr20	42294903	42296114	5	7.01756e-25	0.53969	-0.0446552	-0.0163365	cg23843505	TSS1500	MYBL2	-	island	NA
277	chr20	42294903	42296114	5	7.01756e-25	0.53969	-0.0446552	-0.0163365	cg16487280	TSS1500	MYBL2	-	island	NA
277	chr20	42294903	42296114	5	7.01756e-25	0.53969	-0.0446552	-0.0163365	cg14430582	TSS200	MYBL2	-	island	NA
277	chr20	42294903	42296114	5	7.01756e-25	0.53969	-0.0446552	-0.0163365	cg08290421	TSS200	MYBL2	-	island	NA
277	chr20	42294903	42296114	5	7.01756e-25	0.53969	-0.0446552	-0.0163365	cg14577472	TSS200	MYBL2	-	island	NA
278	chr7	2827064	2827233	2	9.7627e-14	0.549312	0.221481	0.110324	cg18634690	Body	GNA12	5mC	open sea	NA
278	chr7	2827064	2827233	2	9.7627e-14	0.549312	0.221481	0.110324	cg19422369	Body	GNA12	5mC	open sea	NA
279	chr19	49176968	49177693	3	9.43229e-12	0.550294	0.0468182	0.0151601	cg02446487	TSS1500;Body	NTN5;SEC1	-	shelf	NA
279	chr19	49176968	49177693	3	9.43229e-12	0.550294	0.0468182	0.0151601	cg21658372	TSS1500;Body	NTN5;SEC1	-	shelf	NA
279	chr19	49176968	49177693	3	9.43229e-12	0.550294	0.0468182	0.0151601	cg07051648	TSS1500;Body	NTN5;SEC1	-	shelf	NA
280	chr13	111214096	111214457	3	9.7265e-10	0.556559	0.0328909	0.0136352	cg12736438	TSS1500	RAB20	-	island	NA
280	chr13	111214096	111214457	3	9.7265e-10	0.556559	0.0328909	0.0136352	cg26410311	TSS200	RAB20	-	island	NA
280	chr13	111214096	111214457	3	9.7265e-10	0.556559	0.0328909	0.0136352	cg05045294	TSS200	RAB20	-	island	NA
280	chr13	111214096	111214457	3	9.7265e-10	0.556559	0.0328909	0.0136352	cg00473245	TSS200	RAB20	-	island	NA
280	chr13	111214096	111214457	3	9.7265e-10	0.556559	0.0328909	0.0136352	cg25404263	TSS200	RAB20	-	island	NA
280	chr13	111214096	111214457	3	9.7265e-10	0.556559	0.0328909	0.0136352	cg05734176	TSS200	RAB20	-	island	NA
280	chr13	111214096	111214457	3	9.7265e-10	0.556559	0.0328909	0.0136352	cg22983760	TSS200	RAB20	-	island	NA
281	chr11	32421514	32421845	6	5.36325e-11	0.565149	0.0944327	0.0417046	cg20449659	Body;Body;Body;Body	WT1;WT1;WT1;WT1	-	open sea	NA
281	chr11	32421514	32421845	6	5.36325e-11	0.565149	0.0944327	0.0417046	cg01168289	Body;Body;Body;Body	WT1;WT1;WT1;WT1	-	open sea	NA
281	chr11	32421514	32421845	6	5.36325e-11	0.565149	0.0944327	0.0417046	cg27019929	Body;Body;Body;Body	WT1;WT1;WT1;WT1	-	open sea	NA
281	chr11	32421514	32421845	6	5.36325e-11	0.565149	0.0944327	0.0417046	cg24325551	Body;Body;Body;Body	WT1;WT1;WT1;WT1	-	open sea	NA
281	chr11	32421514	32421845	6	5.36325e-11	0.565149	0.0944327	0.0417046	cg10244666	Body;Body;Body;Body	WT1;WT1;WT1;WT1	-	open sea	NA
281	chr11	32421514	32421845	6	5.36325e-11	0.565149	0.0944327	0.0417046	cg08575722	Body;Body;Body;Body	WT1;WT1;WT1;WT1	-	open sea	NA
282	chr5	122422411	122423190	4	1.41041e-10	0.568152	0.0453373	0.0121783	cg18829827	-	-	-	shore	NA
282	chr5	122422411	122423190	4	1.41041e-10	0.568152	0.0453373	0.0121783	cg01434160	-	-	-	shore	NA
282	chr5	122422411	122423190	4	1.41041e-10	0.568152	0.0453373	0.0121783	cg04285666	-	-	-	shore	NA
282	chr5	122422411	122423190	4	1.41041e-10	0.568152	0.0453373	0.0121783	cg14698448	-	-	-	shore	NA
283	chr6	32117377	32117725	6	7.75193e-10	0.571267	0.0965185	0.0648125	cg07444414	Body	PRRT1	-	shore	NA
283	chr6	32117377	32117725	6	7.75193e-10	0.571267	0.0965185	0.0648125	cg18501647	Body	PRRT1	-	shore	NA
283	chr6	32117377	32117725	6	7.75193e-10	0.571267	0.0965185	0.0648125	cg11515873	Body	PRRT1	-	shore	NA
283	chr6	32117377	32117725	6	7.75193e-10	0.571267	0.0965185	0.0648125	cg15078061	Body	PRRT1	-	shore	NA
283	chr6	32117377	32117725	6	7.75193e-10	0.571267	0.0965185	0.0648125	cg14732337	Body	PRRT1	-	shore	NA
283	chr6	32117377	32117725	6	7.75193e-10	0.571267	0.0965185	0.0648125	cg14849065	Body	PRRT1	-	shore	NA
284	chr1	46951291	46951589	3	1.99735e-10	0.587612	0.0691864	0.0253889	cg19807257	-	-	-	island	NA
284	chr1	46951291	46951589	3	1.99735e-10	0.587612	0.0691864	0.0253889	cg03311232	-	-	-	island	V$CHX10_01
284	chr1	46951291	46951589	3	1.99735e-10	0.587612	0.0691864	0.0253889	cg03257575	-	-	-	island	NA
284	chr1	46951291	46951589	3	1.99735e-10	0.587612	0.0691864	0.0253889	cg03401357	-	-	-	island	NA
284	chr1	46951291	46951589	3	1.99735e-10	0.587612	0.0691864	0.0253889	cg19375537	-	-	-	island	NA
285	chr1	3162104	3162922	7	4.20315e-14	0.58866	0.142063	0.00594158	cg19704073	Body;Body	PRDM16;PRDM16	-	shore	NA
285	chr1	3162104	3162922	7	4.20315e-14	0.58866	0.142063	0.00594158	cg00849570	Body;Body	PRDM16;PRDM16	-	shore	NA
285	chr1	3162104	3162922	7	4.20315e-14	0.58866	0.142063	0.00594158	cg16710099	Body;Body	PRDM16;PRDM16	-	shore	NA
285	chr1	3162104	3162922	7	4.20315e-14	0.58866	0.142063	0.00594158	cg17104202	Body;Body	PRDM16;PRDM16	-	shore	NA
285	chr1	3162104	3162922	7	4.20315e-14	0.58866	0.142063	0.00594158	cg12800122	Body;Body	PRDM16;PRDM16	-	shore	NA
285	chr1	3162104	3162922	7	4.20315e-14	0.58866	0.142063	0.00594158	cg27229529	Body;Body	PRDM16;PRDM16	-	shore	NA
285	chr1	3162104	3162922	7	4.20315e-14	0.58866	0.142063	0.00594158	cg10952596	Body;Body	PRDM16;PRDM16	-	shore	NA
286	chr22	50170670	50170866	2	2.68341e-11	0.591592	0.178278	0.088327	cg03941531	Body	BRD1	5mC	island	NA
286	chr22	50170670	50170866	2	2.68341e-11	0.591592	0.178278	0.088327	cg21821726	Body	BRD1	5mC	island	NA
287	chr14	52734156	52735485	9	2.23365e-63	0.595759	0.0806094	-0.00639573	cg08504659	1stExon	PTGDR	-	island	NA
287	chr14	52734156	52735485	9	2.23365e-63	0.595759	0.0806094	-0.00639573	cg19716643	1stExon	PTGDR	-	island	NA
287	chr14	52734156	52735485	9	2.23365e-63	0.595759	0.0806094	-0.00639573	cg05302386	1stExon;5'UTR	PTGDR;PTGDR	-	island	NA
287	chr14	52734156	52735485	9	2.23365e-63	0.595759	0.0806094	-0.00639573	cg09516965	1stExon;5'UTR	PTGDR;PTGDR	-	island	NA
287	chr14	52734156	52735485	9	2.23365e-63	0.595759	0.0806094	-0.00639573	cg18693395	Body	PTGDR	-	island	NA
287	chr14	52734156	52735485	9	2.23365e-63	0.595759	0.0806094	-0.00639573	cg27634876	Body	PTGDR	-	island	NA
287	chr14	52734156	52735485	9	2.23365e-63	0.595759	0.0806094	-0.00639573	cg10837806	TSS1500	PTGDR	-	shore	NA
287	chr14	52734156	52735485	9	2.23365e-63	0.595759	0.0806094	-0.00639573	cg24089118	TSS200	PTGDR	-	island	NA
287	chr14	52734156	52735485	9	2.23365e-63	0.595759	0.0806094	-0.00639573	cg18242103	TSS200	PTGDR	-	island	NA
287	chr14	52734156	52735485	9	2.23365e-63	0.595759	0.0806094	-0.00639573	cg24989962	TSS200	PTGDR	-	island	NA
287	chr14	52734156	52735485	9	2.23365e-63	0.595759	0.0806094	-0.00639573	cg17929687	TSS200	PTGDR	-	island	NA
287	chr14	52734156	52735485	9	2.23365e-63	0.595759	0.0806094	-0.00639573	cg02191312	TSS200	PTGDR	-	island	NA
288	chr5	1278791	1279449	3	2.49442e-25	0.611674	0.0286711	0.010308	cg06560300	Body;Body	TERT;TERT	-	shore	NA
288	chr5	1278791	1279449	3	2.49442e-25	0.611674	0.0286711	0.010308	cg06674436	Body;Body	TERT;TERT	-	shore	NA
288	chr5	1278791	1279449	3	2.49442e-25	0.611674	0.0286711	0.010308	cg11832804	Body;Body	TERT;TERT	-	shore	V$EGR1_01;V$EGR2_01;V$EGR3_01
289	chr10	132632041	132632713	7	3.65422e-20	0.616702	0.143537	0.0672725	cg08483912	-	-	5mC	open sea	NA
289	chr10	132632041	132632713	7	3.65422e-20	0.616702	0.143537	0.0672725	cg03912661	-	-	5mC	open sea	NA
289	chr10	132632041	132632713	7	3.65422e-20	0.616702	0.143537	0.0672725	cg16430256	-	-	5mC	open sea	NA
289	chr10	132632041	132632713	7	3.65422e-20	0.616702	0.143537	0.0672725	cg05351173	-	-	5mC	open sea	NA
289	chr10	132632041	132632713	7	3.65422e-20	0.616702	0.143537	0.0672725	cg02948497	-	-	5mC	open sea	NA
289	chr10	132632041	132632713	7	3.65422e-20	0.616702	0.143537	0.0672725	cg14822754	-	-	-	open sea	NA
289	chr10	132632041	132632713	7	3.65422e-20	0.616702	0.143537	0.0672725	cg13842203	-	-	-	open sea	NA
290	chr6	144329382	144330345	14	6.44863e-13	0.621999	0.110247	0.0346047	cg22352234	1stExon;Body;5'UTR;5'UTR;5'UTR;1stExon;5'UTR;1stExon;1stExon;1stExon;5'UTR;5'UTR;1stExon;5'UTR;5'UTR	PLAGL1;HYMAI;PLAGL1;PLAGL1;PLAGL1;PLAGL1;PLAGL1;PLAGL1;PLAGL1;PLAGL1;PLAGL1;PLAGL1;PLAGL1;PLAGL1;PLAGL1	-	island	NA
290	chr6	144329382	144330345	14	6.44863e-13	0.621999	0.110247	0.0346047	cg00702231	1stExon;Body;5'UTR;5'UTR;5'UTR;1stExon;5'UTR;1stExon;1stExon;1stExon;5'UTR;5'UTR;1stExon;5'UTR;5'UTR	PLAGL1;HYMAI;PLAGL1;PLAGL1;PLAGL1;PLAGL1;PLAGL1;PLAGL1;PLAGL1;PLAGL1;PLAGL1;PLAGL1;PLAGL1;PLAGL1;PLAGL1	-	island	V$PPARG_03
290	chr6	144329382	144330345	14	6.44863e-13	0.621999	0.110247	0.0346047	cg12757684	1stExon;Body;5'UTR;5'UTR;5'UTR;1stExon;5'UTR;1stExon;1stExon;1stExon;5'UTR;5'UTR;1stExon;5'UTR;5'UTR	PLAGL1;HYMAI;PLAGL1;PLAGL1;PLAGL1;PLAGL1;PLAGL1;PLAGL1;PLAGL1;PLAGL1;PLAGL1;PLAGL1;PLAGL1;PLAGL1;PLAGL1	-	island	V$PPARG_03;V$E2F_02
290	chr6	144329382	144330345	14	6.44863e-13	0.621999	0.110247	0.0346047	cg21952820	Body;5'UTR;TSS200;TSS200;5'UTR;TSS200;TSS200;TSS200;TSS200	HYMAI;PLAGL1;PLAGL1;PLAGL1;PLAGL1;PLAGL1;PLAGL1;PLAGL1;PLAGL1	-	island	NA
290	chr6	144329382	144330345	14	6.44863e-13	0.621999	0.110247	0.0346047	cg05326984	Body;TSS1500;TSS1500;5'UTR;TSS1500;TSS1500;TSS1500;5'UTR;TSS1500	HYMAI;PLAGL1;PLAGL1;PLAGL1;PLAGL1;PLAGL1;PLAGL1;PLAGL1;PLAGL1	-	island	NA
290	chr6	144329382	144330345	14	6.44863e-13	0.621999	0.110247	0.0346047	cg08263357	Body;TSS1500;TSS1500;5'UTR;TSS1500;TSS1500;TSS1500;5'UTR;TSS1500	HYMAI;PLAGL1;PLAGL1;PLAGL1;PLAGL1;PLAGL1;PLAGL1;PLAGL1;PLAGL1	-	island	NA
290	chr6	144329382	144330345	14	6.44863e-13	0.621999	0.110247	0.0346047	cg11532302	Body;TSS1500;TSS1500;5'UTR;TSS1500;TSS1500;TSS1500;5'UTR;TSS1500	HYMAI;PLAGL1;PLAGL1;PLAGL1;PLAGL1;PLAGL1;PLAGL1;PLAGL1;PLAGL1	-	island	NA
290	chr6	144329382	144330345	14	6.44863e-13	0.621999	0.110247	0.0346047	cg27216384	Body;TSS1500;TSS1500;5'UTR;TSS1500;TSS1500;TSS1500;5'UTR;TSS1500	HYMAI;PLAGL1;PLAGL1;PLAGL1;PLAGL1;PLAGL1;PLAGL1;PLAGL1;PLAGL1	-	island	NA
290	chr6	144329382	144330345	14	6.44863e-13	0.621999	0.110247	0.0346047	cg17895149	Body;TSS1500;TSS1500;5'UTR;TSS1500;TSS1500;TSS1500;5'UTR;TSS1500	HYMAI;PLAGL1;PLAGL1;PLAGL1;PLAGL1;PLAGL1;PLAGL1;PLAGL1;PLAGL1	-	island	NA
290	chr6	144329382	144330345	14	6.44863e-13	0.621999	0.110247	0.0346047	cg03562868	TSS1500;TSS1500;5'UTR;TSS1500;TSS1500;TSS1500;5'UTR;TSS200;TSS1500	PLAGL1;PLAGL1;PLAGL1;PLAGL1;PLAGL1;PLAGL1;PLAGL1;HYMAI;PLAGL1	-	shore	NA
290	chr6	144329382	144330345	14	6.44863e-13	0.621999	0.110247	0.0346047	cg23460430	TSS1500;TSS1500;5'UTR;TSS1500;TSS1500;TSS1500;5'UTR;TSS200;TSS1500	PLAGL1;PLAGL1;PLAGL1;PLAGL1;PLAGL1;PLAGL1;PLAGL1;HYMAI;PLAGL1	-	shore	NA
290	chr6	144329382	144330345	14	6.44863e-13	0.621999	0.110247	0.0346047	cg14161241	TSS1500;TSS1500;5'UTR;TSS1500;TSS1500;TSS1500;5'UTR;TSS200;TSS1500	PLAGL1;PLAGL1;PLAGL1;PLAGL1;PLAGL1;PLAGL1;PLAGL1;HYMAI;PLAGL1	-	shore	NA
290	chr6	144329382	144330345	14	6.44863e-13	0.621999	0.110247	0.0346047	cg20443501	TSS1500;TSS1500;5'UTR;TSS1500;TSS1500;TSS1500;5'UTR;TSS200;TSS1500	PLAGL1;PLAGL1;PLAGL1;PLAGL1;PLAGL1;PLAGL1;PLAGL1;HYMAI;PLAGL1	-	shore	NA
290	chr6	144329382	144330345	14	6.44863e-13	0.621999	0.110247	0.0346047	cg04840930	TSS1500;TSS1500;5'UTR;TSS1500;TSS1500;TSS1500;5'UTR;TSS200;TSS1500	PLAGL1;PLAGL1;PLAGL1;PLAGL1;PLAGL1;PLAGL1;PLAGL1;HYMAI;PLAGL1	-	shore	NA
290	chr6	144329382	144330345	14	6.44863e-13	0.621999	0.110247	0.0346047	cg18593039	TSS1500;TSS1500;5'UTR;TSS1500;TSS1500;TSS1500;TSS1500;5'UTR;TSS1500	PLAGL1;PLAGL1;PLAGL1;PLAGL1;PLAGL1;HYMAI;PLAGL1;PLAGL1;PLAGL1	-	shore	NA
290	chr6	144329382	144330345	14	6.44863e-13	0.621999	0.110247	0.0346047	cg23840797	TSS1500;TSS1500;5'UTR;TSS1500;TSS1500;TSS1500;TSS1500;5'UTR;TSS1500	PLAGL1;PLAGL1;PLAGL1;PLAGL1;PLAGL1;HYMAI;PLAGL1;PLAGL1;PLAGL1	-	shore	NA
290	chr6	144329382	144330345	14	6.44863e-13	0.621999	0.110247	0.0346047	cg00981250	TSS1500;TSS1500;5'UTR;TSS1500;TSS1500;TSS1500;TSS1500;5'UTR;TSS1500	PLAGL1;PLAGL1;PLAGL1;PLAGL1;PLAGL1;HYMAI;PLAGL1;PLAGL1;PLAGL1	-	shore	NA
291	chr17	59473124	59474078	5	6.10474e-21	0.624746	-0.0219758	0.00243732	cg27125849	-	-	-	island	NA
291	chr17	59473124	59474078	5	6.10474e-21	0.624746	-0.0219758	0.00243732	cg14244013	-	-	-	island	NA
291	chr17	59473124	59474078	5	6.10474e-21	0.624746	-0.0219758	0.00243732	cg14355911	-	-	-	island	NA
291	chr17	59473124	59474078	5	6.10474e-21	0.624746	-0.0219758	0.00243732	cg24157892	-	-	-	island	NA
291	chr17	59473124	59474078	5	6.10474e-21	0.624746	-0.0219758	0.00243732	cg04304333	-	-	-	island	NA
291	chr17	59473124	59474078	5	6.10474e-21	0.624746	-0.0219758	0.00243732	cg01488770	-	-	-	island	NA
292	chr17	3585069	3585166	2	4.48925e-09	0.632851	-0.0910876	-0.0510072	cg23551198	Body;Body	P2RX5;P2RX5	-	open sea	NA
292	chr17	3585069	3585166	2	4.48925e-09	0.632851	-0.0910876	-0.0510072	cg17093615	Body;Body	P2RX5;P2RX5	-	open sea	NA
293	chr22	19751899	19755334	7	4.21256e-09	0.642258	0.088343	0.0077812	cg21507095	Body;3'UTR;Body	TBX1;TBX1;TBX1	-	island	NA
293	chr22	19751899	19755334	7	4.21256e-09	0.642258	0.088343	0.0077812	cg04999026	Body;3'UTR;Body	TBX1;TBX1;TBX1	-	island	NA
293	chr22	19751899	19755334	7	4.21256e-09	0.642258	0.088343	0.0077812	cg18867923	Body;Body	TBX1;TBX1	-	shore	NA
293	chr22	19751899	19755334	7	4.21256e-09	0.642258	0.088343	0.0077812	cg24345184	Body;Body;Body	TBX1;TBX1;TBX1	-	island	NA
293	chr22	19751899	19755334	7	4.21256e-09	0.642258	0.088343	0.0077812	cg00720629	Body;Body;Body	TBX1;TBX1;TBX1	-	shore	NA
293	chr22	19751899	19755334	7	4.21256e-09	0.642258	0.088343	0.0077812	cg04679902	Body;Body;Body	TBX1;TBX1;TBX1	-	shore	NA
293	chr22	19751899	19755334	7	4.21256e-09	0.642258	0.088343	0.0077812	cg00204782	Body;Body;Body	TBX1;TBX1;TBX1	-	island	NA
293	chr22	19751899	19755334	7	4.21256e-09	0.642258	0.088343	0.0077812	cg01697719	Body;Body;Body	TBX1;TBX1;TBX1	-	island	NA
293	chr22	19751899	19755334	7	4.21256e-09	0.642258	0.088343	0.0077812	cg08382235	Body;Body;Body	TBX1;TBX1;TBX1	-	island	NA
294	chr14	100405616	100405934	2	2.38136e-11	0.671212	0.0857972	0.0371277	cg05876892	Body;Body	EML1;EML1	-	open sea	NA
294	chr14	100405616	100405934	2	2.38136e-11	0.671212	0.0857972	0.0371277	cg11199642	Body;Body	EML1;EML1	-	open sea	NA
295	chr6	3848863	3849702	26	2.46237e-11	0.698495	0.106396	0.0311315	cg03202897	1stExon;5'UTR	FAM50B;FAM50B	-	island	NA
295	chr6	3848863	3849702	26	2.46237e-11	0.698495	0.106396	0.0311315	cg21153160	1stExon;5'UTR	FAM50B;FAM50B	-	island	NA
295	chr6	3848863	3849702	26	2.46237e-11	0.698495	0.106396	0.0311315	cg25073793	1stExon;5'UTR	FAM50B;FAM50B	-	island	NA
295	chr6	3848863	3849702	26	2.46237e-11	0.698495	0.106396	0.0311315	cg26211800	TSS1500	FAM50B	-	shore	NA
295	chr6	3848863	3849702	26	2.46237e-11	0.698495	0.106396	0.0311315	cg15382302	TSS1500	FAM50B	-	shore	NA
295	chr6	3848863	3849702	26	2.46237e-11	0.698495	0.106396	0.0311315	cg22649349	TSS1500	FAM50B	-	shore	NA
295	chr6	3848863	3849702	26	2.46237e-11	0.698495	0.106396	0.0311315	cg16907934	TSS1500	FAM50B	-	shore	NA
295	chr6	3848863	3849702	26	2.46237e-11	0.698495	0.106396	0.0311315	cg03330552	TSS1500	FAM50B	-	shore	NA
295	chr6	3848863	3849702	26	2.46237e-11	0.698495	0.106396	0.0311315	cg18872973	TSS1500	FAM50B	-	shore	NA
295	chr6	3848863	3849702	26	2.46237e-11	0.698495	0.106396	0.0311315	cg17739279	TSS1500	FAM50B	-	shore	NA
295	chr6	3848863	3849702	26	2.46237e-11	0.698495	0.106396	0.0311315	cg18656763	TSS1500	FAM50B	-	shore	NA
295	chr6	3848863	3849702	26	2.46237e-11	0.698495	0.106396	0.0311315	cg01570885	TSS1500	FAM50B	-	island	NA
295	chr6	3848863	3849702	26	2.46237e-11	0.698495	0.106396	0.0311315	cg09821214	TSS1500	FAM50B	-	island	NA
295	chr6	3848863	3849702	26	2.46237e-11	0.698495	0.106396	0.0311315	cg07898446	TSS1500	FAM50B	-	island	NA
295	chr6	3848863	3849702	26	2.46237e-11	0.698495	0.106396	0.0311315	cg25195497	TSS1500	FAM50B	-	island	NA
295	chr6	3848863	3849702	26	2.46237e-11	0.698495	0.106396	0.0311315	cg21740964	TSS1500	FAM50B	-	island	NA
295	chr6	3848863	3849702	26	2.46237e-11	0.698495	0.106396	0.0311315	cg13289019	TSS1500	FAM50B	-	island	NA
295	chr6	3848863	3849702	26	2.46237e-11	0.698495	0.106396	0.0311315	cg12840312	TSS1500	FAM50B	-	island	NA
295	chr6	3848863	3849702	26	2.46237e-11	0.698495	0.106396	0.0311315	cg01905633	TSS1500	FAM50B	-	island	NA
295	chr6	3848863	3849702	26	2.46237e-11	0.698495	0.106396	0.0311315	cg21177626	TSS1500	FAM50B	-	island	NA
295	chr6	3848863	3849702	26	2.46237e-11	0.698495	0.106396	0.0311315	cg03954573	TSS200	FAM50B	-	island	NA
295	chr6	3848863	3849702	26	2.46237e-11	0.698495	0.106396	0.0311315	cg19362611	TSS200	FAM50B	-	island	NA
295	chr6	3848863	3849702	26	2.46237e-11	0.698495	0.106396	0.0311315	cg18197332	TSS200	FAM50B	-	island	NA
295	chr6	3848863	3849702	26	2.46237e-11	0.698495	0.106396	0.0311315	cg04447621	TSS200	FAM50B	-	island	NA
295	chr6	3848863	3849702	26	2.46237e-11	0.698495	0.106396	0.0311315	cg23835083	TSS200	FAM50B	-	island	NA
295	chr6	3848863	3849702	26	2.46237e-11	0.698495	0.106396	0.0311315	cg18487516	TSS200	FAM50B	-	island	NA
295	chr6	3848863	3849702	26	2.46237e-11	0.698495	0.106396	0.0311315	cg12497786	TSS200	FAM50B	-	island	NA
296	chr7	139929429	139930256	6	1.22245e-28	0.704953	0.0955575	0.00961572	cg08042316	-	-	-	island	NA
296	chr7	139929429	139930256	6	1.22245e-28	0.704953	0.0955575	0.00961572	cg01003666	-	-	-	shore	NA
296	chr7	139929429	139930256	6	1.22245e-28	0.704953	0.0955575	0.00961572	cg21056706	-	-	-	shore	NA
296	chr7	139929429	139930256	6	1.22245e-28	0.704953	0.0955575	0.00961572	cg22459664	-	-	-	shore	NA
296	chr7	139929429	139930256	6	1.22245e-28	0.704953	0.0955575	0.00961572	cg16063989	-	-	-	shore	NA
296	chr7	139929429	139930256	6	1.22245e-28	0.704953	0.0955575	0.00961572	cg22418737	-	-	-	island	NA
297	chr6	32026350	32026891	7	1.96266e-12	0.705571	-0.108093	-0.0117229	cg14642392	Body	TNXB	-	open sea	NA
297	chr6	32026350	32026891	7	1.96266e-12	0.705571	-0.108093	-0.0117229	cg06365270	Body	TNXB	-	open sea	NA
297	chr6	32026350	32026891	7	1.96266e-12	0.705571	-0.108093	-0.0117229	cg21951797	Body	TNXB	-	open sea	NA
297	chr6	32026350	32026891	7	1.96266e-12	0.705571	-0.108093	-0.0117229	cg25596754	Body	TNXB	-	open sea	NA
297	chr6	32026350	32026891	7	1.96266e-12	0.705571	-0.108093	-0.0117229	cg19071976	Body	TNXB	-	open sea	NA
297	chr6	32026350	32026891	7	1.96266e-12	0.705571	-0.108093	-0.0117229	cg16225663	Body	TNXB	-	open sea	NA
297	chr6	32026350	32026891	7	1.96266e-12	0.705571	-0.108093	-0.0117229	cg16678426	Body	TNXB	-	open sea	NA
298	chr17	76988208	76988558	3	5.18409e-16	0.716698	0.260082	0.0908806	cg10999136	3'UTR;3'UTR;3'UTR	CANT1;CANT1;CANT1	5mC	shore	NA
298	chr17	76988208	76988558	3	5.18409e-16	0.716698	0.260082	0.0908806	cg04131638	3'UTR;3'UTR;3'UTR	CANT1;CANT1;CANT1	5mC	shore	NA
298	chr17	76988208	76988558	3	5.18409e-16	0.716698	0.260082	0.0908806	cg06530270	3'UTR;3'UTR;3'UTR	CANT1;CANT1;CANT1	5mC	shore	NA
299	chr3	66908772	66909150	4	1.20767e-12	0.726353	-0.0258137	-0.0155088	cg22160662	-	-	-	open sea	NA
299	chr3	66908772	66909150	4	1.20767e-12	0.726353	-0.0258137	-0.0155088	cg05668667	-	-	-	open sea	NA
299	chr3	66908772	66909150	4	1.20767e-12	0.726353	-0.0258137	-0.0155088	cg25350464	-	-	-	open sea	NA
299	chr3	66908772	66909150	4	1.20767e-12	0.726353	-0.0258137	-0.0155088	cg03731235	-	-	-	open sea	NA
300	chr20	42543034	42543422	5	3.39618e-10	0.729873	0.0425163	0.0134566	cg18693412	TSS1500	TOX2	-	island	NA
300	chr20	42543034	42543422	5	3.39618e-10	0.729873	0.0425163	0.0134566	cg00789528	TSS1500	TOX2	-	shore	NA
300	chr20	42543034	42543422	5	3.39618e-10	0.729873	0.0425163	0.0134566	cg11667451	TSS1500	TOX2	-	island	NA
300	chr20	42543034	42543422	5	3.39618e-10	0.729873	0.0425163	0.0134566	cg23872756	TSS1500;TSS200;TSS1500	TOX2;TOX2;TOX2	-	island	NA
300	chr20	42543034	42543422	5	3.39618e-10	0.729873	0.0425163	0.0134566	cg06239208	TSS1500;TSS200;TSS1500	TOX2;TOX2;TOX2	-	island	NA
301	chr16	88717374	88717989	11	4.79674e-11	0.752231	-0.0972699	-0.0276412	cg26537639	1stExon	CYBA	-	island	NA
301	chr16	88717374	88717989	11	4.79674e-11	0.752231	-0.0972699	-0.0276412	cg04879832	1stExon;5'UTR	CYBA;CYBA	-	island	NA
301	chr16	88717374	88717989	11	4.79674e-11	0.752231	-0.0972699	-0.0276412	cg05744675	TSS1500	CYBA	-	shore	NA
301	chr16	88717374	88717989	11	4.79674e-11	0.752231	-0.0972699	-0.0276412	cg19790294	TSS1500	CYBA	-	shore	NA
301	chr16	88717374	88717989	11	4.79674e-11	0.752231	-0.0972699	-0.0276412	cg03870138	TSS1500	CYBA	-	shore	NA
301	chr16	88717374	88717989	11	4.79674e-11	0.752231	-0.0972699	-0.0276412	cg27176614	TSS1500	CYBA	-	shore	NA
301	chr16	88717374	88717989	11	4.79674e-11	0.752231	-0.0972699	-0.0276412	cg09025501	TSS200	CYBA	-	island	NA
301	chr16	88717374	88717989	11	4.79674e-11	0.752231	-0.0972699	-0.0276412	cg08843517	TSS200	CYBA	-	island	NA
301	chr16	88717374	88717989	11	4.79674e-11	0.752231	-0.0972699	-0.0276412	cg03125427	TSS200	CYBA	-	island	NA
301	chr16	88717374	88717989	11	4.79674e-11	0.752231	-0.0972699	-0.0276412	cg08177833	TSS200	CYBA	-	island	NA
301	chr16	88717374	88717989	11	4.79674e-11	0.752231	-0.0972699	-0.0276412	cg00054525	TSS200	CYBA	-	island	NA
301	chr16	88717374	88717989	11	4.79674e-11	0.752231	-0.0972699	-0.0276412	cg10246531	TSS200	CYBA	-	shore	NA
301	chr16	88717374	88717989	11	4.79674e-11	0.752231	-0.0972699	-0.0276412	cg24046411	TSS200	CYBA	-	shore	NA
302	chr6	29342522	29342706	5	1.70489e-10	0.781631	0.486029	0.0981194	cg01553182	1stExon	OR12D3	-	open sea	NA
302	chr6	29342522	29342706	5	1.70489e-10	0.781631	0.486029	0.0981194	cg20856834	1stExon	OR12D3	-	open sea	NA
302	chr6	29342522	29342706	5	1.70489e-10	0.781631	0.486029	0.0981194	cg19459843	1stExon	OR12D3	-	open sea	NA
302	chr6	29342522	29342706	5	1.70489e-10	0.781631	0.486029	0.0981194	cg03608577	1stExon	OR12D3	-	open sea	NA
302	chr6	29342522	29342706	5	1.70489e-10	0.781631	0.486029	0.0981194	cg10278025	1stExon	OR12D3	-	open sea	NA
303	chr19	51522894	51522921	2	9.9679e-09	0.81499	0.0487794	0.0200937	cg18437710	5'UTR;5'UTR;1stExon;5'UTR	KLK10;KLK10;KLK10;KLK10	-	shore	NA
303	chr19	51522894	51522921	2	9.9679e-09	0.81499	0.0487794	0.0200937	cg17766007	5'UTR;5'UTR;1stExon;5'UTR	KLK10;KLK10;KLK10;KLK10	-	shore	NA
304	chr6	31855906	31856502	15	7.52367e-10	0.866491	0.0991427	0.00642348	cg09733045	Body;Body	EHMT2;EHMT2	5mC	shore	NA
304	chr6	31855906	31856502	15	7.52367e-10	0.866491	0.0991427	0.00642348	cg19669701	Body;Body	EHMT2;EHMT2	5mC	shore	NA
304	chr6	31855906	31856502	15	7.52367e-10	0.866491	0.0991427	0.00642348	cg04637007	Body;Body	EHMT2;EHMT2	5mC	shore	NA
304	chr6	31855906	31856502	15	7.52367e-10	0.866491	0.0991427	0.00642348	cg23649211	Body;Body	EHMT2;EHMT2	5mC	shore	NA
304	chr6	31855906	31856502	15	7.52367e-10	0.866491	0.0991427	0.00642348	cg11209988	Body;Body	EHMT2;EHMT2	5mC	shore	NA
304	chr6	31855906	31856502	15	7.52367e-10	0.866491	0.0991427	0.00642348	cg02629156	Body;Body	EHMT2;EHMT2	5mC	shore	NA
304	chr6	31855906	31856502	15	7.52367e-10	0.866491	0.0991427	0.00642348	cg07028705	Body;Body	EHMT2;EHMT2	5mC	shore	NA
304	chr6	31855906	31856502	15	7.52367e-10	0.866491	0.0991427	0.00642348	cg25202877	Body;Body	EHMT2;EHMT2	5mC	shore	NA
304	chr6	31855906	31856502	15	7.52367e-10	0.866491	0.0991427	0.00642348	cg05720054	Body;Body	EHMT2;EHMT2	5mC	shore	NA
304	chr6	31855906	31856502	15	7.52367e-10	0.866491	0.0991427	0.00642348	cg04227254	Body;Body	EHMT2;EHMT2	5mC	shore	NA
304	chr6	31855906	31856502	15	7.52367e-10	0.866491	0.0991427	0.00642348	cg21472542	Body;Body	EHMT2;EHMT2	5mC	shore	NA
304	chr6	31855906	31856502	15	7.52367e-10	0.866491	0.0991427	0.00642348	cg11203797	Body;Body	EHMT2;EHMT2	5mC	shore	NA
304	chr6	31855906	31856502	15	7.52367e-10	0.866491	0.0991427	0.00642348	cg06411506	Body;Body	EHMT2;EHMT2	5mC	shore	NA
304	chr6	31855906	31856502	15	7.52367e-10	0.866491	0.0991427	0.00642348	cg21318835	Body;Body	EHMT2;EHMT2	5mC	shore	NA
304	chr6	31855906	31856502	15	7.52367e-10	0.866491	0.0991427	0.00642348	cg14790153	Body;Body	EHMT2;EHMT2	5mC	shore	V$XBP1_01
305	chr19	42348588	42349032	7	4.91461e-14	0.895801	0.157007	0.0228004	cg07890457	TSS1500;TSS1500	LYPD4;DMRTC2	-	island	NA
305	chr19	42348588	42349032	7	4.91461e-14	0.895801	0.157007	0.0228004	cg11308549	TSS1500;TSS200	LYPD4;DMRTC2	-	island	NA
305	chr19	42348588	42349032	7	4.91461e-14	0.895801	0.157007	0.0228004	cg15142488	TSS1500;TSS200	LYPD4;DMRTC2	-	shore	NA
305	chr19	42348588	42349032	7	4.91461e-14	0.895801	0.157007	0.0228004	cg17347810	TSS1500;TSS200	LYPD4;DMRTC2	-	shore	NA
305	chr19	42348588	42349032	7	4.91461e-14	0.895801	0.157007	0.0228004	cg13324643	TSS1500;TSS200	LYPD4;DMRTC2	-	shore	NA
305	chr19	42348588	42349032	7	4.91461e-14	0.895801	0.157007	0.0228004	cg04669422	TSS200;TSS1500	LYPD4;DMRTC2	-	shore	NA
305	chr19	42348588	42349032	7	4.91461e-14	0.895801	0.157007	0.0228004	cg00588262	TSS200;TSS1500	LYPD4;DMRTC2	-	shore	NA
305	chr19	42348588	42349032	7	4.91461e-14	0.895801	0.157007	0.0228004	cg00741731	TSS200;TSS1500	LYPD4;DMRTC2	-	island	NA
305	chr19	42348588	42349032	7	4.91461e-14	0.895801	0.157007	0.0228004	cg21557875	TSS200;TSS1500	LYPD4;DMRTC2	-	island	NA
306	chr6	33256078	33256912	7	1.25226e-18	0.942453	0.0413804	0.00937742	cg21754746	1stExon;1stExon;TSS1500	WDR46;WDR46;PFDN6	-	island	NA
306	chr6	33256078	33256912	7	1.25226e-18	0.942453	0.0413804	0.00937742	cg13600781	TSS1500;Body;Body	PFDN6;WDR46;WDR46	-	island	NA
306	chr6	33256078	33256912	7	1.25226e-18	0.942453	0.0413804	0.00937742	cg27355501	TSS1500;Body;Body	PFDN6;WDR46;WDR46	-	shore	NA
306	chr6	33256078	33256912	7	1.25226e-18	0.942453	0.0413804	0.00937742	cg19048360	TSS1500;Body;Body	PFDN6;WDR46;WDR46	-	shore	NA
306	chr6	33256078	33256912	7	1.25226e-18	0.942453	0.0413804	0.00937742	cg17131579	TSS1500;Body;Body	PFDN6;WDR46;WDR46	-	shore	NA
[truncated: 85 more rows]

## Sheet: TS5. BS-DMRs
Supplementary Table 5. 5mC-DMRs, 5hmC-DhMRs and BS-DMRs (cohort 2).
[truncated: 1,404 more rows]

## Sheet: Description
Supplementary Table 5. 5mC-DMRs, 5hmC-DhMRs and BS-DMRs (cohort 2).
[truncated: 1 more rows]
